# Supplementary material for: Biological and Clinical Factors contributing to the Metabolic Heterogeneity of Hospitalized Patients with and without COVID-19
Source: Res Sq. 2021 May 10:rs.3.rs-480167. Preprint. [Version 1] doi: 10.21203/rs.3.rs-480167/v1 (PMC8132252; doi:10.21203/rs.3.rs-480167/v1)
Supplement: Supplement 1 [file 5ba0268b3d640b7bbd173f18.xlsx]

## Sheet: Supplementary Table 1 - All raw
Supplementary Table 1 - Metabolomics data of COVID-19 patients
Sheet 1 - Relative quantitative metabolomics data
Sheet 2 - Absolute quantitative metabolomics date
Sheet 3 - Template for MetaboAnalyst analyses including clinical covariates	*including demographics (sex, age, ethnicity, race, blood group, etc) and clinical history
Sheet 4 - Legend for abbreviations and units of clinical covariates in Sheet 3
Sheet 5 - Time series analysis of patient 188 (MetaboAnalyst ready)
Sheet 6 - Time series analysis of patient 701 (MetaboAnalyst ready)
Sheet 5 - Time series analysis of patient 707 (MetaboAnalyst ready)
Sheet 6 - Correlates to Age
Sheet 7 - Correlates to IL-6
Sheet 8 - Correlates to BUN
Sheet 9 - Markers to Death
Sheet 10 - Correlates to BMI
Sheet 11 - Correlates to CRP
Sheet 12 - Correlates to CK
Sheet 13 - Correlates to ALT
Sheet 14 - Correlates to AST
Sheet 15 - Correlates to LDH
Sheet 16 - Correlates to Coagulation parameters
Sheet 17 - Batch to Batch Correction with MetaboDrift
Sheet 18 - Lipidomics in top 15 lowest and highest BMI in Covid Negative and Positive patients

## Sheet: Relative quant (AU)
Name	Label	(5-L-Glutamyl)-L-glutamine	(R)-S-Lactoylglutathione	(Z)-5-Oxohex-2-enedioate	3-Methyleneoxindole	5-Guanidino-2-oxopentanoate	5-Hydroxyindoleacetate	5-Hydroxyisourate	5-Oxoproline	Adenine	Adenosine	Allantoate	Anthranilate	choline	Creatine	Creatinine	Dopamine	gamma-Glutamyl-gamma-aminobutyrate	gamma-L-Glutamyl-D-alanine	Guanidinoacetate	Guanosine	Hypoxanthine	Indole	Indole-3-acetaldehyde	Indolepyruvate	Inosine	L-Adrenaline	L-Alanine	L-Arginine	L-Asparagine	L-Aspartate	L-Carnitine	L-Citrulline	L-Cystine	L-Glutamate	L-Glutamine	L-Histidine	L-Isoleucine	L-Kynurenine	L-Lysine	L-Methionine	L-Methionine S-oxide	L-Phenylalanine	L-Proline	L-Serine	L-Threonine	L-Tryptophan	L-Tyrosine	L-Valine
1 M	Positive	1.39464e+06	348658	5.98393e+06	6.81979e+06	547303	775581	2.84484e+06	7.03881e+06	883394	16304.9	347018	834933	3.39009e+07	1.69887e+08	1.14789e+08	544457	66387.8	186228	471943	17321.4	1.13258e+07	3.27379e+06	277944	1.60465e+06	50179.6	1.69122e+07	1.82131e+07	3.56579e+06	328957	212453	6.59652e+07	413808	766260	1.24353e+06	9.03004e+06	1.5932e+06	1.38788e+08	2.72963e+06	4.19221e+06	2.47944e+07	750554	9.7953e+07	3.97934e+07	742658	3.70186e+06	8.57089e+07	5.60169e+07	1.50756e+08
4 M	Positive	949516	44673.4	4.99912e+06	1.7194e+06	461933	720460	2.40653e+06	7.35967e+06	1.20513e+06	424789	568031	794115	4.66842e+07	2.69551e+07	4.1894e+08	40578.7	196324	289587	340718	45897.5	4.07573e+07	3.49353e+06	81733.2	450524	61306.3	1.46954e+07	1.00675e+07	2.16633e+06	278115	173481	1.25032e+08	530956	1.53198e+06	1.96328e+06	9.33684e+06	1.72091e+06	8.34705e+07	2.53276e+06	3.78035e+06	1.38023e+07	397037	5.13932e+07	4.84704e+07	284252	3.23421e+06	2.31391e+07	2.62243e+07	9.98636e+07
7 M	Positive	1.14352e+06	182024	9.31174e+06	1.05237e+07	683714	345301	1.89667e+06	1.13645e+07	1.95992e+06	141744	628389	2.07258e+06	3.97518e+07	7.85924e+07	6.46963e+07	24505	47838	349690	517317	45397.9	1.89077e+07	4.96197e+06	441538	1.99561e+06	139595	2.0958e+07	1.8566e+07	7.03885e+06	391853	265602	1.00348e+08	459332	940285	4.89465e+06	1.36682e+07	1.74448e+06	1.09367e+08	1.06034e+06	5.13484e+06	2.91589e+07	314735	8.41736e+07	7.28973e+07	903618	4170441	1.32126e+08	8.23511e+07	1.61741e+08
10 M	Positive	1.23851e+06	305513	7.5052e+06	7.56476e+06	624828	1.19937e+06	2.06654e+06	1.14921e+07	4.38025e+06	1.46982e+06	668893	2.43288e+06	6.71645e+07	3.92803e+07	1.01474e+08	33291.5	175946	205081	193147	174155	2.14587e+07	3.44346e+06	352460	1.42754e+06	250552	2.08525e+07	1.36996e+07	6.56074e+06	504651	253479	1.12749e+08	1.55624e+06	872589	1.27393e+06	1.35784e+07	1.56927e+06	7.64907e+07	4.33649e+06	2.56784e+06	3.26124e+07	137934	1.04384e+08	3.94016e+07	835567	2.83791e+06	1.0305e+08	1.6973e+08	1.07415e+08
13 M	Positive	2.1815e+06	115370	8.03581e+06	1.00456e+07	577087	585148	1.98845e+06	1.57749e+07	3.93828e+06	124478	615996	2.08175e+06	6.99789e+07	1.67238e+07	7.79256e+07	25334.5	75756.6	507065	589529	22852.2	2.46705e+07	4.49515e+06	436506	1.24715e+06	63393.4	1.67238e+07	2.59752e+07	1.16625e+07	580395	322555	1.0651e+08	919200	734549	2.75197e+06	1.99262e+07	1.96541e+06	6.51413e+07	2.12939e+06	4.53556e+06	3.71244e+07	269098	8.74143e+07	8.57538e+07	954300	3.22225e+06	1.19794e+08	1.51819e+08	1.34027e+08
15A-M	Positive	695674	1.3098e+06	7.1089e+06	3.76223e+06	1.83675e+06	402911	2.90493e+06	5.93939e+06	3.82845e+06	13919.2	288117	361487	4.14963e+07	2.46553e+08	1.60327e+08	98528.8	173740	134941	348975	0	2.78887e+07	1.75548e+06	156983	503914	0	1.25645e+07	7.32776e+06	1.06924e+06	195293	1.54454e+06	7.04629e+07	406694	776302	1.88031e+06	7.10798e+06	1.05397e+06	8.15979e+07	1.309e+06	1.96551e+06	9.39338e+06	47295.5	5.29482e+07	2.35774e+07	407460	1.69853e+06	4.83674e+07	3.67808e+07	1.22333e+08
24 M	Positive	157428	47910	6.41374e+06	1.02906e+07	403856	361901	2.18144e+06	6.26782e+06	2.73723e+06	288566	933569	2.22375e+06	4.60108e+07	1.43475e+07	8.02468e+07	66014.9	207293	123254	810620	36977.1	1.11811e+07	4.64679e+06	438100	1.24519e+06	57026.9	1.45454e+07	1.47433e+07	7.3645e+06	471162	283937	8.14342e+07	889781	425638	4.09371e+06	8.59844e+06	1.80245e+06	7.16156e+07	1.4054e+06	5.34132e+06	5.56088e+07	300918	6.21394e+07	8.97459e+07	1.08881e+06	6.88195e+06	1.34569e+08	1.60296e+08	1.45454e+08
27M	Positive	857344	64735.6	6.797e+06	4.74606e+06	2.40381e+06	608263	2.07219e+06	1.16452e+07	4.24598e+06	557066	583438	1.31221e+06	4.18618e+07	1.18342e+08	8.10228e+07	99639	63482.5	290117	399484	129036	2.38158e+07	3.22975e+06	178362	941957	180028	2.8358e+07	2.1115e+07	3.60929e+06	399238	452166	1.70639e+08	733226	790952	2.45118e+06	1.48542e+07	1.08718e+06	1.63021e+08	2.03455e+06	2.90986e+06	8.62086e+06	43457.6	7.03425e+07	6.06443e+07	1.26447e+06	2.93336e+06	6.45727e+07	8.48284e+07	1.32583e+08
2 M	Positive	2.36222e+06	58300.3	9.95459e+06	6.18917e+06	561199	347795	1.15435e+06	1.50993e+07	3.75279e+06	105491	1.08878e+06	1.96186e+06	4.64676e+07	1.15903e+08	3.54089e+07	38751.6	78384.4	272576	498624	9728.01	3.14746e+07	2.93274e+06	249032	1.27329e+06	82911.1	1.28663e+07	1.03376e+07	9.68074e+06	549054	445926	7.82612e+07	2.99538e+06	670209	6.89741e+06	1.76513e+07	1.56624e+06	1.30499e+08	1.16038e+06	6.41429e+06	3.98749e+07	221679	5.83769e+07	8.24082e+07	1.04064e+06	7.30163e+06	8.10259e+07	1.06333e+08	2.2649e+08
5 M	Positive	374275	748800	7.20917e+06	4.79538e+06	506471	584728	1.72998e+06	7.70318e+06	3.26323e+06	622263	357040	1.2433e+06	3.84354e+07	2.01834e+07	1.18783e+08	28341.8	24450.9	194068	243210	74289.9	7.01332e+06	2.37867e+06	165764	609238	141929	2.14389e+07	1.59343e+07	2.27492e+06	250348	284920	9.08737e+07	306162	656479	4.55523e+06	8.93881e+06	1.35038e+06	5.91919e+07	2.01081e+06	2.3654e+06	1.59343e+07	120486	3.32206e+08	6.23851e+07	555066	1.71169e+06	6.32543e+07	6.22886e+07	1.4872e+08
8 M	Positive	1.3084e+06	1.06933e+06	8.38022e+06	8.96131e+06	1.11595e+06	1.00474e+06	1.72855e+06	1.08013e+07	3.71439e+06	228353	647058	1.66492e+06	4.99382e+07	2.62146e+07	9.82157e+07	28031.1	62376.4	484058	376458	45098.3	7.91093e+06	4.00748e+06	412845	1.55494e+06	110071	1.8623e+07	2.41981e+07	5.30547e+06	496823	408018	7.43735e+07	374746	970841	2.40526e+06	1.38783e+07	1.9251e+06	9.43161e+07	3.58945e+06	3.22355e+06	4.24653e+07	284246	9.52503e+07	8.93194e+07	878630	3.24538e+06	1.18381e+08	1.62507e+08	1.5539e+08
11 M	Positive	473189	290871	5.09516e+06	3.75541e+06	420433	1.1581e+06	3.39306e+06	8.05172e+06	943270	105918	437154	1.59917e+06	3.68306e+07	8.68948e+06	3.75481e+08	31051	60785	75069.8	123878	6772.82	6.53613e+06	1.67499e+06	158230	1.74866e+06	21970.1	1.46685e+07	1.09216e+07	3.45723e+06	437623	193512	8.05172e+07	273616	1.17612e+06	2.81872e+06	1.01244e+07	1.18568e+06	8.65693e+07	4.15997e+06	3.27957e+06	1.57048e+07	393917	6.86389e+07	61862715	680943	2.84641e+06	4.5281e+07	4.48026e+07	1.38713e+08
16 M	Positive	104665	43270.6	5.01336e+06	3.01031e+06	366182	682058	2.46286e+06	8.3722e+06	1.19209e+06	186759	483113	630453	4.04533e+07	1.81521e+07	4.53433e+08	14438.8	114273	134366	188514	23860.8	1.25953e+07	1.55914e+06	109860	651563	50625.8	2.19307e+07	8.89083e+06	1.8229e+06	226156	141304	1.49662e+08	652935	1.249e+06	2.57403e+06	4.01479e+06	949516	6.43051e+07	2.52675e+06	1.91891e+06	1.40772e+07	154016	4.66028e+07	3.50447e+07	321074	1.03833e+06	4.00828e+07	3.40074e+07	8.81674e+07
19 M	Positive	1.71021e+06	99140.8	6.60217e+06	6.69315e+06	423722	632714	1.87476e+06	1.05193e+07	3.84115e+06	230667	481655	1.37777e+06	5.75244e+07	3.94236e+07	9.95068e+07	76066.4	135388	428367	221605	53176.8	1.431e+07	2.94496e+06	396928	929021	104715	1.79112e+07	1.50682e+07	4.64774e+06	348209	340802	1.11827e+08	617367	585938	5.0718e+06	1.22251e+07	1.21134e+06	1.09589e+08	2.10622e+06	2.90358e+06	2.83357e+07	136743	8.16903e+07	5.85668e+07	714142	2.86995e+06	8.17851e+07	9.5716e+07	1.98066e+08
22 M	Positive	806285	989620	6.81257e+06	7.23213e+06	367835	622661	1.4088e+06	7.92491e+06	2.45118e+06	95489.6	449502	1.23841e+06	5.48918e+07	4.72263e+07	1.08374e+08	57708	58011.2	204280	227766	10812	7.51599e+06	3.17484e+06	268682	1.06236e+06	38281.7	1.40974e+07	2.11461e+07	5.71506e+06	502756	351880	7.30422e+07	385281	868856	2.12708e+06	9.86819e+06	1.42749e+06	146074687	2.40894e+06	4.07209e+06	2.92521e+07	229527	7.65666e+07	5.75351e+07	1.1728e+06	3.78792e+06	8.89899e+07	9.07521e+07	2.32607e+08
25 M	Positive	2.32556e+06	105431	8.0996e+06	4.25049e+06	682646	673941	2.34161e+06	1.52144e+07	2.77427e+06	301108	934429	2.5339e+06	6.73202e+07	5.41255e+07	1.08924e+08	46374.1	221231	158892	776452	17992.5	8.26692e+07	2.00335e+06	174233	1.6157e+06	300186	1.57529e+07	1.96575e+07	2.44337e+06	569918	732405	9.14209e+07	1.18078e+06	1.14219e+06	5.8538e+06	1.79072e+07	1.43085e+06	75136660	2.40222e+06	3.46231e+06	1.79072e+07	287132	8.11882e+07	8.15921e+07	1.02382e+06	4.059e+06	5.23751e+07	7.06862e+07	1.3868e+08
3 M	Positive	685644	287621	6.6126e+06	3.62779e+06	551571	556006	2.16403e+06	1.1597e+07	3.3324e+06	408687	910999	982291	3.91062e+07	1.49233e+07	1.5193e+08	47831	152849	214659	137882	67851.6	8.45873e+06	1.78932e+06	145914	582492	118926	2.19354e+07	1.95082e+07	2.23937e+06	317763	323003	1.18667e+08	708936	988762	2.82364e+06	1.11475e+07	1.22257e+06	1.09929e+08	2.02049e+06	2.16076e+06	1.95981e+07	43741.6	1.50132e+08	4.84557e+07	679306	2.04439e+06	4.93547e+07	8.1269e+07	1.64516e+08
6 M	Positive	990613	57722.5	7.27071e+06	4.8242e+06	485502	625666	1.89568e+06	8.21142e+06	1.57846e+06	72198.5	507038	2.55717e+06	8.24891e+07	8.39747e+07	1.13597e+08	41021.5	266226	275813	630497	18046.8	1.29326e+07	2.30276e+06	232163	2.27065e+06	50061.2	8.82564e+06	1.62532e+07	6.92066e+06	438285	280473	5.86337e+07	900728	1.03623e+06	2.6772e+06	1.03985e+07	1.24357e+06	1.08531e+08	2.1956e+06	4.62889e+06	2.56905e+07	432848	7.70714e+07	1.06607e+08	828231	4.10701e+06	6.30028e+07	8.06541e+07	164279237
9 M	Positive	829529	119399	8.55931e+06	9.22647e+06	731342	583247	2.24345e+06	1.22232e+07	1.79825e+06	273021	711433	1.76831e+06	5.14613e+07	2.87938e+07	1.08681e+08	34068.4	54311.3	126366	566535	64134.5	2.49955e+07	4.3023e+06	300280	1.71879e+06	235321	2.52405e+07	1.91142e+07	5.93632e+06	479359	363821	1.05986e+08	870563	1.173e+06	9.07762e+06	1.38455e+07	1.69359e+06	1.31674e+08	1.96597e+06	4.85598e+06	1.56834e+07	683332	7.55991e+07	7.29035e+07	1.01334e+06	3.65993e+06	1.15053e+08	5.58722e+07	1.39681e+08
15 M	Positive	777672	675875	5.86106e+06	3.23336e+06	7.30346e+06	312424	2.88979e+06	6.40116e+06	4.52426e+06	134818	428050	617914	2.85287e+07	1.87797e+08	1.86771e+08	104993	77837.9	222940	304909	102408	2.83235e+07	1.3742e+06	152033	480768	107187	2.80156e+07	8.56142e+06	4.16777e+06	214220	234283	1.10831e+08	603778	2.33025e+06	2.76977e+06	7.88964e+06	1.04319e+06	7.01213e+07	1.18162e+06	2.99746e+06	1.3546e+07	49642.3	3.65332e+07	3.58149e+07	493191	2.12935e+06	4.51534e+07	6.81406e+07	9.70798e+07
17 M	Positive	1.10466e+06	2.33669e+06	9.55931e+06	4.74446e+06	607169	495341	2.3487e+06	1.26355e+07	4.47641e+06	1.86318e+06	910133	1.75706e+06	7.53174e+07	3.76587e+07	6.34252e+07	49931.2	124936	173507	626527	582580	2.84918e+07	2.13702e+06	218143	521324	751547	2.56426e+07	1.23877e+07	8.91008e+06	554368	316956	1.26355e+08	1.22312e+06	1.26109e+06	1.47373e+06	1.4122e+07	2.0429e+06	1.06498e+08	1.69667e+06	7.4042e+06	3.34469e+07	193647	5.20285e+07	9.3899e+07	1.14648e+06	3.32962e+06	6.00805e+07	8.1759e+07	1.47414e+08
20 M	Positive	414057	2759.6	3.58103e+06	3.17538e+06	295689	921387	1.19349e+06	8.19117e+06	1.34361e+06	84002.1	695310	962658	6.61772e+07	2.81832e+08	101348326	35943.8	110229	263259	108769	18639.4	1.48089e+07	1.47987e+06	150384	544576	20999.6	1.57344e+07	3.43844e+07	696627	360944	250849	1.4161e+08	527689	1.11835e+06	2.6032e+06	9.90344e+06	1.029e+06	6.5873e+07	3.24386e+06	3.86494e+06	3.09598e+07	161387	7.72839e+07	5.69217e+07	515316	2.32794e+06	4.52597e+07	7.63583e+07	8.42255e+07
26M	Positive	1.32098e+06	17468.1	6.74903e+06	6.81875e+06	351027	1.24218e+06	2.09149e+06	8.39804e+06	1.13598e+06	243320	721959	1.41545e+06	3.74119e+07	6.4582e+07	1.10035e+08	69326.1	104613	286121	374103	51396.4	2.30227e+07	2.65973e+06	269841	1.81356e+06	148838	2.09913e+07	2.0822e+07	6.39383e+06	605508	274441	9.73386e+07	413585	717464	1.28854e+06	1.04956e+07	1.64536e+06	1.35422e+08	4.26665e+06	5.3574e+06	3.82583e+07	331416	1.15113e+08	5.55253e+07	903759	4.18372e+06	7.51623e+07	6.49206e+07	1.53202e+08
29 M	Positive	1.83641e+06	0	7.76993e+06	2.57131e+06	610580	279973	2.62553e+06	1.38842e+07	2.29933e+06	116532	701487	2.97632e+06	6.33622e+07	1.4389e+08	7.00519e+07	20723.1	184669	214753	560910	20890.2	1.70396e+07	1.446e+06	112065	883579	75109.5	1.33793e+07	2.48653e+07	7.44336e+06	390853	343676	8.5072e+07	736241	1.17318e+06	5.12873e+06	1.76707e+07	2.19017e+06	1.18275e+08	958188	6.19522e+06	2.08262e+07	772280	4.68275e+07	124073882	1.2015e+06	4.10358e+06	3.43317e+07	3.79921e+07	1.60299e+08
30 M	Positive	349235	25648.8	5.04136e+06	5.03532e+06	296463	476168	1.47432e+06	1.17575e+07	1.88606e+06	252105	489617	1.11317e+06	6.31371e+07	1.78741e+08	8.56327e+07	23907.6	255304	121772	569542	33627.6	6.19817e+07	2.37009e+06	209159	1.25077e+06	67841	1.93013e+07	1.71945e+07	4.14278e+06	576536	382603	1.0942e+08	752691	650266	3.47291e+06	8.4953e+06	1.04444e+06	5.91564e+07	1.88695e+06	3.41434e+06	3.17385e+07	192451	1.21653e+08	5.49136e+07	779168	3.22246e+06	6.56517e+07	9.99048e+07	8.63123e+07
33 M	Positive	143849	4922.39	3.64159e+06	633854	199813	160777	1.30778e+06	1.11246e+07	1.28295e+06	51772.3	450482	745496	3.72037e+07	4.89363e+08	2.04864e+08	26358.2	1.87965e+06	391271	133573	21467	1.35563e+07	313142	22545	100030	62975.3	2.31004e+07	5.80527e+06	4.12505e+06	53958.9	107956	159270857	556172	8.81461e+06	1.24787e+06	4.21599e+06	543094	1.52382e+07	603109	1.33329e+06	7.53801e+06	106333	1.50152e+07	3.89059e+07	280151	3.10963e+06	6.68694e+06	1.16718e+07	2.77812e+07
36 M	Positive	1.4356e+06	230666	7.7457e+06	8.40841e+06	643929	910472	1.91283e+06	1.20873e+07	2.92837e+06	190892	816225	1.81319e+06	4.30447e+07	1.87996e+07	1.0813e+08	42628.7	76065.2	421692	363772	7528.33	1.73735e+07	3.79163e+06	347084	1.4533e+06	39606.8	2.17816e+07	2.99498e+07	7.15113e+06	699135	506396	1.17725e+08	437839	910898	4.30761e+06	1.84107e+07	1.83102e+06	1.05786e+08	3.39887e+06	5.10857e+06	2.83939e+07	229011	8.94603e+07	8.42742e+07	1.25772e+06	5.21359e+06	1.05797e+08	8.37556e+07	1.59473e+08
39 M	Positive	427653	1.15333e+06	4.85795e+06	4.32059e+06	303111	272911	2.07901e+06	5.78178e+06	1.59527e+06	75808.6	557211	873821	9.71929e+07	1.24551e+08	3.93091e+07	15028.4	112820	124536	172936	6232.84	5.72358e+07	1.858e+06	189724	1.13023e+06	13053.9	6.36246e+06	1.3175e+07	3.83684e+06	522237	457206	3.47015e+07	459909	439901	4.9405e+06	6.49833e+06	1.38909e+06	1.46173e+08	1.06457e+06	4.08641e+06	3.79412e+07	225970	6.9475e+07	4.55727e+07	950009	3.464e+06	5.67319e+07	7.10588e+07	2.21024e+08
42 M	Positive	2.70268e+06	129945	6.77724e+06	6.43811e+06	694256	937366	1.72229e+06	1.21246e+07	4.32794e+06	381748	717791	2.5102e+06	2.79095e+07	4.09492e+07	7.2519e+07	13914.8	281294	675984	286342	122016	4.5639e+07	2.97288e+06	258302	1.36053e+06	442495	1.68144e+07	2.24191e+07	4.89356e+06	409369	436763	8.07546e+07	448490	324355	4.86073e+06	1.5213e+07	1.26362e+06	1.43934e+08	3.24196e+06	4.43016e+06	2.24191e+07	64857.6	6.94307e+07	9.40231e+07	1.67722e+06	4.13594e+06	8.71601e+07	1.46411e+08	1.86445e+08
45 M	Positive	658114	28058.7	9.93818e+06	3.52233e+06	369000	964166	2.40439e+06	8.31058e+06	3.52699e+06	135005	525943	1.48196e+06	6.65122e+07	2.52746e+07	109563755	28408.9	283814	417018	330606	22580.3	3.03538e+07	1.52208e+06	143537	775348	18548.2	1.89862e+07	2.33397e+07	4.25691e+06	382942	335199	1.15731e+08	469114	854446	4.5954e+06	9.11356e+06	1.20366e+06	8.52352e+07	3.41356e+06	2.94479e+06	3.48282e+07	175443	105935816	5.88935e+07	731124	2.80064e+06	4.78888e+07	1.10894e+08	1.51164e+08
48 M	Positive	1.05831e+06	132337	8.78469e+06	7.52681e+06	258054	608719	2.56349e+06	1.33429e+07	4.51759e+06	125255	733134	854653	7.78722e+07	1.63336e+07	1.05593e+08	23135.4	21571.3	280882	344708	37217.4	2.45004e+07	3.41963e+06	380534	613253	92388.8	1.78289e+07	1.57585e+07	5.255e+06	483282	309613	1.17326e+08	907176	946706	3.88587e+06	1.57585e+07	1.67376e+06	9.90737e+07	2.17856e+06	3.71099e+06	2.243e+07	115917	6.93603e+07	4.88858e+07	1.02431e+06	2.80261e+06	9.77716e+07	1.04673e+08	1.3803e+08
51 M	Positive	1.66824e+06	80928.9	6.31294e+06	6.39027e+06	398999	508020	1.78354e+06	8.75252e+06	3.22285e+06	96074.2	910540	1.40459e+06	9.15405e+07	9.90902e+07	9.6259e+07	34047.9	198135	507340	483773	3397.02	1.46276e+07	2.9242e+06	285349	828726	4851.65	1.37783e+07	1.94406e+07	5.17836e+06	485060	314506	8.10652e+07	792036	675962	3.12327e+06	1.10415e+07	1.35388e+06	7.20712e+07	1.65367e+06	3.60939e+06	3.7843e+07	216969	1.17965e+08	6.25684e+07	979463	3.54332e+06	7.90834e+07	1.12302e+08	1.61375e+08
54 M	Positive	2.19586e+06	190329	7.06801e+06	3.71026e+06	1.70839e+06	660191	2.59162e+06	1.41586e+07	2.57216e+06	124547	734156	1.20612e+06	6.34925e+07	1.15039e+07	1.28312e+08	57083.5	115929	614079	320786	69024.6	1.261e+07	1.62378e+06	115664	1.93991e+06	107308	1.34949e+07	2.51094e+07	7.63001e+06	645737	341586	8.73852e+07	1.359e+06	528614	3.33985e+06	1.79195e+07	1.47758e+06	2.45365e+08	2.75715e+06	3.2463e+06	2.3229e+07	50719.4	6.11696e+07	5.42009e+07	1.02931e+06	4.1405e+06	5.15462e+07	1.0619e+08	1.79195e+08
56 M	Positive	925599	353832	1.01644e+07	4.85063e+06	848804	915662	3.08053e+06	1.11195e+07	4.02208e+06	91053.3	425829	1.17536e+06	5.04171e+07	1.85923e+07	2.17748e+08	54924.6	311903	276200	324384	18944.2	7.95113e+06	2.07352e+06	176486	985625	34771.6	1.49012e+07	2.42873e+07	7.33542e+06	543106	396004	7.23594e+07	521291	1.10939e+06	3.55292e+06	1.25005e+07	2.31667e+06	8.49492e+07	3.2971e+06	3.12008e+06	2.32823e+07	202608	9.51392e+07	6.0467e+07	904666	3.62001e+06	5.8792e+07	4.27121e+07	1.62641e+08
34 M	Positive	590605	44592.1	5.31913e+06	7.8762e+06	287831	825803	1.05574e+06	6.85772e+06	2.13114e+06	304966	718080	1.3e+06	6.78983e+07	5.26891e+07	7.9441e+07	26951.1	66754.8	201211	168630	75383	7.9441e+07	3.74572e+06	316456	975968	100843	1.75857e+07	1.77893e+07	3.70589e+06	595203	562909	1.21538e+08	387979	715686	3.53545e+06	7.33301e+06	1.22629e+06	1.19359e+08	2.92612e+06	3.36247e+06	3.49676e+07	230428	7.19722e+07	5.93431e+07	1.07428e+06	3.68607e+06	9.98104e+07	107958239	1.6703e+08
40 M	Positive	466806	34537.9	6.49962e+06	6.17604e+06	532092	1.03137e+06	1.31837e+06	7.06269e+06	3.52831e+06	273324	463714	813688	5.75346e+07	1.95141e+08	8.0072e+07	14829.6	56294.1	274836	388146	59215.9	4.44336e+07	2.65063e+06	274017	1.31086e+06	77319.3	1.75902e+07	1.77734e+07	4.52942e+06	442294	374728	1.1452e+08	371149	1.13205e+06	3.84557e+06	6.94781e+06	1.37439e+06	1.01533e+08	3.32506e+06	2.97091e+06	3.08745e+07	179865	6.79788e+07	4.28761e+07	700211	3.34732e+06	7.81481e+07	120932605	1.29178e+08
43 M	Positive	1.12495e+06	188777	4.71169e+06	4.27549e+06	449386	990212	2.96986e+06	1.04713e+07	1.30554e+06	47902	604572	2.07733e+06	7.09807e+07	1.09949e+07	3.62757e+08	54729.3	448237	216787	254692	9351.93	1.46599e+07	1.98926e+06	177978	546586	26563.3	1.07705e+07	1.75021e+07	5.20047e+06	375433	210357	6.91108e+07	1.20761e+06	1.05176e+06	2.94549e+06	1.25656e+07	1.86949e+06	7.72486e+07	3.21103e+06	5.14356e+06	1.8998e+07	323287	6.71662e+07	6.76897e+07	809705	3.71593e+06	5.75924e+07	3.52286e+07	1.09201e+08
46 M	Positive	1.16557e+06	422029	1.09461e+07	6.18749e+06	465527	626600	2.00006e+06	1.24269e+07	5.90653e+06	117173	356136	858591	5.74125e+07	1.85868e+07	1.54202e+08	26515.5	155369	477088	378056	5646.75	6.13835e+06	2.86752e+06	262028	487926	23792.4	2.4094e+07	2.35433e+07	7.29156e+06	502171	398226	1.29006e+08	669625	730437	2.65484e+06	1.59709e+07	1.21794e+06	9.9547e+07	1.98946e+06	2.49498e+06	2.78114e+07	167118	8.6463e+07	4.48837e+07	1.10761e+06	2.94921e+06	8.06805e+07	7.53109e+07	1.6797e+08
49 M	Positive	1.74401e+06	106930	5.69668e+06	6.11777e+06	482643	711571	2.00025e+06	1.14792e+07	3.41721e+06	207327	482164	1.26836e+06	4.32474e+07	4.42262e+07	1.26361e+08	38639.5	114630	929072	555815	65936	2.50942e+07	2.68124e+06	256416	610638	162001	1.9399e+07	3.53276e+07	4.74004e+06	497485	335971	1.21911e+08	859360	1.10511e+06	5.12299e+06	1.3348e+07	1.03835e+06	1.27102e+08	2.70897e+06	3.25698e+06	2.17127e+07	41614	4.92095e+07	6.67398e+07	983127	3.90526e+06	8.67617e+07	1.01444e+08	1.25471e+08
52 M	Positive	343337	843210	6.92228e+06	8.36048e+06	469250	1.24853e+06	2.30937e+06	9.19452e+06	2.55002e+06	178889	716761	2.07063e+06	7.82281e+07	2.26748e+07	1.65526e+08	27854.6	53812.3	336766	436544	38081.3	3.0611e+07	3.83803e+06	353871	890163	115165	2.18812e+07	2.86837e+07	5.47578e+06	424216	399200	1.02944e+08	1.24425e+06	1.07214e+06	11677534	9.09702e+06	1.55234e+06	7.15705e+07	4.33017e+06	4.98576e+06	2.59627e+07	173159	5.82743e+07	9.01324e+07	611327	3.56199e+06	1.06118e+08	7.04053e+07	123577787
55 M	Positive	1.25162e+06	43731.8	3.25134e+06	2.50195e+06	2.48968e+06	392089	1.10498e+06	1.27746e+07	1.87357e+06	123011	858846	1.88718e+06	4.54916e+07	9.08414e+07	4.76207e+07	16941.6	179317	299115	666781	26983.4	1.34133e+07	1.06741e+06	87780.4	1.02856e+06	67153.9	1.90199e+07	1.98006e+07	1.37681e+07	853376	313803	1.50456e+08	538586	959508	2.47502e+06	1.63231e+07	1.6027e+06	2.66227e+08	1.11067e+06	1.08584e+07	3.7543e+07	95660.9	4.97498e+07	8.09056e+07	1.50652e+06	1.25617e+07	3.17945e+07	8.65832e+07	1.54004e+08
57 M	Positive	1.22928e+06	488031	6.36415e+06	7.13458e+06	472585	903120	2.10207e+06	1.37452e+07	2.80031e+06	88886.5	481756	2.46645e+06	5.48707e+07	8.13714e+07	5.34412e+07	28810.2	177668	419841	100853	22485.2	1.17659e+07	2.99104e+06	312151	1.16939e+06	43319.6	2.71605e+07	2.23222e+07	6.61734e+06	546620	726911	1.22057e+08	346116	1.04084e+06	1.24256e+07	1.66042e+07	1.32849e+06	8.47064e+07	3.17269e+06	3.36921e+06	3.05693e+07	193169	6.11385e+07	1.06553e+08	1.2854e+06	6.36429e+06	6.34477e+07	8.30208e+07	2.15524e+08
32 M	Positive	1.73025e+06	345300	6.19204e+06	9.60287e+06	462567	671846	1.10154e+06	7.07878e+06	3.4802e+06	607937	441028	1.06071e+06	4.98209e+07	5.87293e+07	9.04035e+07	26496.7	92107.5	329591	493087	175482	1.04591e+08	4.37915e+06	387843	1.02026e+06	895734	1.41874e+07	1.50673e+07	2.89645e+06	489032	938600	7.1267e+07	525106	948355	4.31942e+06	9.28372e+06	1.26726e+06	1.15401e+08	2.28857e+06	2.58059e+06	1.93565e+07	123997	9.51327e+07	4.3772e+07	1.06793e+06	2.3241e+06	1.19878e+08	9.98618e+07	1.6717e+08
35 M	Positive	748980	106521	7.28244e+06	6.44501e+06	425833	588210	1.52863e+06	1.18374e+07	2.23768e+06	162725	892899	1.1846e+06	4.45261e+07	4.72411e+07	7.36309e+07	23681	68384.8	138130	342590	26127.7	7.55623e+06	2.91866e+06	294989	1.98681e+06	92939.8	1.61814e+07	1.87878e+07	9.30906e+06	654096	451249	8.73145e+07	520712	702596	2.95454e+06	1.44438e+07	1.62188e+06	1.43891e+08	2.08156e+06	5.8633e+06	3.76843e+07	274581	1.00129e+08	4.88701e+07	1.20478e+06	4.40074e+06	8.28619e+07	7.83007e+07	2.58468e+08
38 M	Positive	633908	378845	6.60415e+06	4.8757e+06	512981	1.01018e+06	2.11339e+06	6.82416e+06	2.29045e+06	64349.2	749622	944290	5.86399e+07	8.43842e+07	1.21571e+08	11158.2	77044.1	188752	209222	4118.97	2.23731e+07	2.18309e+06	163783	1.69701e+06	19101.5	1.37916e+07	2.13515e+07	4.12663e+06	332754	706578	6.42587e+07	561596	872433	5.3174e+06	7.40309e+06	1.45872e+06	1.26392e+08	3.50511e+06	7.16803e+06	3.00351e+07	314112	8.04e+07	3.93316e+07	799498	3.09007e+06	6.22155e+07	8.16259e+07	187974590
41 M	Positive	698587	130095	4.33625e+06	1.96876e+06	1923213	975850	1.65302e+06	9.7964e+06	3.64561e+06	79228.6	340947	3.27228e+06	7.76176e+07	9.35197e+06	4.66271e+08	30648.4	4.19798e+06	160916	159150	48540.7	1.80857e+07	2.27329e+06	98560.2	286518	64532.1	4.16263e+06	1.12093e+07	3.30972e+06	520098	386264	4.61561e+07	1.14985e+06	905005	3.78373e+06	1.19629e+07	922823	1.04825e+08	3.50056e+06	2.07203e+06	8.66757e+06	323082	6.97051e+07	3.94682e+07	468088	1.69097e+06	2.59981e+07	4.81342e+07	111151448
44 M	Positive	443594	32643	4.26447e+06	1.98667e+06	205136	278670	1.19735e+06	9.87059e+06	1.83856e+06	79770.2	212568	499376	1.79878e+07	4.77295e+07	5.12361e+08	115662	383170	740109	329318	19883.1	2.47414e+07	1.56081e+06	86118.6	370897	26493.7	1.09096e+07	1.18187e+07	3.10545e+06	183770	209069	1.18837e+08	140387	2.38508e+06	1.34022e+06	5.18836e+06	1.19428e+06	8.3792e+07	1.10254e+06	2.73357e+06	2.03906e+07	115994	3.32483e+07	2.5131e+07	432476	1.85775e+06	2.33777e+07	5.43532e+07	7.79257e+07
47 M	Positive	1.23579e+06	164985	7.45624e+06	5.40335e+06	491157	536684	1.36465e+06	1.17773e+07	3.16864e+06	140042	485259	2.58697e+06	4.68969e+07	2.97085e+07	8.47752e+07	36062.4	88019.8	799490	490435	71188.2	2.46156e+07	2.33369e+06	216434	998165	163719	1.76129e+07	3.31037e+07	1.03089e+07	542590	550305	1.11407e+08	734957	684920	6.29601e+06	1.27322e+07	1.04202e+06	1.35915e+08	1.78825e+06	5.78769e+06	2.74803e+07	146579	4.71091e+07	105783338	1.25846e+06	8.19689e+06	7.44834e+07	1.12468e+08	1.83556e+08
50 M	Positive	1.43518e+06	9555.21	4.53506e+06	3.01863e+06	200136	766576	1.24325e+06	9.27297e+06	1.41349e+06	36449.2	419356	1.21477e+06	5.50654e+07	5.4493e+07	2.095e+08	21732.9	1.64843e+06	580658	457216	13555.3	1.71149e+07	1.43185e+06	144689	614069	25923.5	1.22495e+07	1.95763e+07	5.10412e+06	585828	155334	100743375	536537	921254	1.63742e+06	1.19633e+07	1.72541e+06	9.00552e+07	2.68539e+06	5.1815e+06	4.13849e+07	260433	5.71833e+07	5.89578e+07	570340	3.86222e+06	4.22435e+07	100743375	1.55122e+08
53 M	Positive	1.55196e+06	605766	5.61028e+06	7.84305e+06	370216	183192	1.46102e+06	1.36384e+07	2.38355e+06	76649.7	385509	2.21397e+06	7.35289e+07	9.4029e+07	6.44649e+07	23649	94626	436260	257784	27817.5	2.6938e+07	3.43321e+06	353876	1.55593e+06	84857.3	1.47397e+07	2.35496e+07	4.82117e+06	839756	250659	8.97934e+07	872230	361386	5.20193e+06	1.62645e+07	1.45085e+06	7.01704e+07	610542	6.01044e+06	4.46426e+07	243030	5.7688e+07	101652919	1.58753e+06	6.48705e+06	9.99587e+07	1.03347e+08	1.75351e+08
55A- M	Positive	1.6234e+06	79567.9	5.75172e+06	2.68149e+06	6.89241e+06	460754	1.06051e+06	1.59328e+07	5.5299e+06	107462	726466	932191	3.69588e+07	112051692	6.93467e+07	40398	114075	257397	300060	85863.8	1.31902e+07	1.19093e+06	117637	819277	167368	1.99812e+07	1.85447e+07	1.01241e+07	774297	422735	1.43656e+08	721304	1.46729e+06	5.18556e+06	1.99812e+07	1.85726e+06	2.16004e+08	1.69951e+06	5.86631e+06	2.18096e+07	69075.2	4.28356e+07	5.60258e+07	1.73709e+06	8.10235e+06	4.8843e+07	9.65107e+07	1.84141e+08
59 M	Positive	1.25112e+06	636519	7.60126e+06	7.46599e+06	3.0715e+06	361276	1.5499e+06	2.14792e+07	6.08143e+06	112000	640871	2.17128e+06	5.70592e+07	3.5416e+07	6.2142e+07	24073.1	66111	332009	625187	64606.7	1.70522e+07	3.25572e+06	289993	450267	130624	8.84783e+06	3.47602e+07	1.04516e+07	1.07793e+06	1.03567e+06	5.52556e+07	820146	629518	5.84538e+06	2.59062e+07	2.59703e+06	2.21595e+08	1.18168e+06	6.46199e+06	3.14809e+07	70850.4	4.08268e+07	1.02641e+08	2.06071e+06	1.68882e+07	1.04444e+08	7.5587e+07	1.72161e+08
62 M	Positive	1.51218e+06	2.59638e+06	7.72592e+06	7.50726e+06	608259	367962	1.796e+06	1.41117e+07	4.58331e+06	46422	467249	1.34293e+06	3.50776e+07	3.5212e+07	7.59343e+07	63800.4	119614	473810	469241	17509.2	9.97935e+06	3.32517e+06	328584	602331	63271.7	1.8278e+07	2.13691e+07	5.68881e+06	571688	541374	7.47248e+07	718688	1.29567e+06	6.03751e+06	1.58589e+07	1.65581e+06	1.58763e+08	1.10878e+06	4.00675e+06	2.98361e+07	168368	8.62829e+07	6.22258e+07	2.10176e+06	6.21603e+06	1.01335e+08	9.3406e+07	2.01596e+08
65 M	Positive	725628	32180.1	4.89379e+06	4.13873e+06	1.12018e+06	1.43378e+06	2.28885e+06	1.35642e+07	2.70946e+06	73810.6	1.06343e+06	778313	5.61697e+07	2.42591e+07	233026039	33931.9	540241	257059	348243	16830.8	3.73885e+07	2.14302e+06	202569	811754	21075.7	1.24339e+07	1.3912e+07	3.37468e+06	382649	313135	8.12113e+07	555448	1.15996e+06	4.38643e+06	9.12975e+06	1.24184e+06	8.66361e+07	4.81608e+06	2.77312e+06	2.45199e+07	94956.4	9.47755e+07	3.92145e+07	484347	2.27898e+06	5.70392e+07	9.30365e+07	9.9123e+07
66A- M	Positive	363103	60349.9	3.01952e+06	3.25586e+06	1.17384e+06	587998	2.25435e+06	3.36716e+06	1.02372e+06	69515.6	272165	843467	8.38621e+07	223632286	2.20837e+08	27516.9	120543	80880.1	1.20048e+06	9552.36	7.65941e+06	1.3918e+06	138756	720987	19246.1	1.15171e+07	9.95164e+06	3.94427e+06	228185	124269	7.04442e+07	384623	576081	2.2381e+06	3.97859e+06	808160	1.01251e+08	2.0711e+06	3.13156e+06	1.53747e+07	312708	9.728e+07	4.65714e+07	362419	1.4503e+06	4.04774e+07	3.2259e+07	1.26911e+08
69 M	Positive	297653	657417	6.52014e+06	9.88755e+06	984357	515980	1.99255e+06	9.51465e+06	2.80741e+06	82832.3	621765	940708	5.33325e+07	4.9975e+07	9.27184e+07	42232.6	52430.7	100261	519093	15715.8	1.78205e+07	4.3092e+06	416315	1.10212e+06	45492.9	5.56512e+06	2.24694e+07	2.0593e+06	538171	544535	1.21644e+08	632990	1.14999e+06	7.41222e+06	1.10794e+07	1.16147e+06	1.07492e+08	1.88252e+06	4.70596e+06	1.57544e+07	254189	6.08222e+07	6.08222e+07	1.27809e+06	3.48317e+06	1.23323e+08	6.00474e+07	2.06615e+08
72 M	Positive	3.59643e+06	280254	7.68067e+06	5.98641e+06	497775	564108	1.83357e+06	2.21652e+07	4.14725e+06	104067	1.09943e+06	2.24112e+06	5.87637e+07	2.80932e+07	1.0361e+08	40106.5	80959.5	541372	826727	18085.6	2.38405e+07	2.58132e+06	236354	1.07434e+06	40758.4	2.38405e+07	3.0155e+07	6.61242e+06	849105	377277	143043176	1.60115e+06	1.14028e+06	3.89471e+06	2.74488e+07	1.7821e+06	6.04272e+07	1.79298e+06	5.74558e+06	3.04128e+07	291660	4.8712e+07	1.09022e+08	2.38124e+06	8.58285e+06	7.70629e+07	7.89959e+07	1.22167e+08
74 M	Positive	1.72588e+06	113392	1.00597e+07	6.44304e+06	408039	537638	1.91994e+06	1.2085e+07	4.70347e+06	170777	404359	1.74179e+06	4.69845e+07	2.77841e+07	1.1972e+08	20251.6	103330	889395	485437	18421	1.71674e+07	2.80198e+06	240282	766611	41746.4	1.87486e+07	3.25277e+07	6.87049e+06	615936	338889	104585747	471894	1.04078e+06	3.56622e+06	1.63768e+07	1.8891e+06	9.42414e+07	1.90897e+06	4.3253e+06	2.78971e+07	166598	7.62369e+07	8.34653e+07	992589	3.70994e+06	8.12064e+07	1.09668e+08	1.89745e+08
77 M	Positive	1.45467e+06	134896	6.44903e+06	7.67587e+06	595223	194590	1.90565e+06	1.39346e+07	4.12134e+06	276585	552325	1.64876e+06	4.15548e+07	2.42611e+07	9.59245e+07	26202.9	101175	269573	496802	81104.7	5.37476e+07	3.31045e+06	279837	889424	113358	3.23481e+07	1.6174e+07	5.76968e+06	459086	465630	1.916e+08	956021	828077	4.76189e+06	1.7667e+07	898003	9.08375e+07	664821	3.8468e+06	2.71226e+07	44804.5	6.23322e+07	6.53182e+07	983717	3.46071e+06	9.95325e+07	1.19812e+08	1.13343e+08
80 M	Positive	810509	1.07629e+06	8.3184e+06	4.91284e+06	313496	1.19575e+06	1.61171e+06	8.29189e+06	4.52451e+06	214829	401180	738176	3.92264e+07	2.84987e+07	9.12393e+07	18429.1	100998	483728	753232	74107.6	1.90714e+07	2.45097e+06	231844	676225	170320	2.29724e+07	2.17804e+07	6.37428e+06	577674	442976	9.55737e+07	304538	760114	2.43744e+06	9.82804e+06	1.36133e+06	1.75146e+08	4.05633e+06	3.88298e+06	3.57589e+07	167491	7.04342e+07	4.22605e+07	1.05191e+06	3.76836e+06	6.49078e+07	9.23229e+07	2.31891e+08
60 M	Positive	722068	92525.5	5.16205e+06	6.2831e+06	271363	288574	1.92577e+06	7.25138e+06	2.77088e+06	47239.7	410607	1.08884e+06	6.58324e+07	9.4556e+07	8.46544e+07	38060.2	35652.5	199584	335399	3439.07	1.56107e+07	2.73596e+06	244437	1.08396e+06	16527.1	1.98032e+07	1.73947e+07	6.33448e+06	551659	294230	1.40942e+08	340171	1.02628e+06	1.43154e+06	9.00958e+06	1.15514e+06	9.83626e+07	971352	3.44982e+06	2.98833e+07	188027	7.0025e+07	5.07569e+07	1.1271e+06	4.22476e+06	7.76073e+07	8.64385e+07	2.08737e+08
63 M	Positive	1.65802e+06	127806	8.04138e+06	6.5492e+06	337223	631551	1.2378e+06	1.08656e+07	3.54844e+06	86227.4	1.10101e+06	1.37207e+06	6.62697e+07	1.07581e+07	1.24794e+08	33310	156371	634945	354833	9975.34	3.39493e+06	2.78887e+06	295963	1.27741e+06	30571.4	1.22642e+07	2.668e+07	6.6019e+06	628493	490533	6.50863e+07	542685	728584	4.2582e+06	1.29097e+07	1.50334e+06	115416439	2.20646e+06	4.36202e+06	4.19565e+07	246691	1.00911e+08	5.70178e+07	1.01049e+06	4.80307e+06	8.39129e+07	155992003	2.17313e+08
65A- M	Positive	445296	170757	6.41496e+06	5.77831e+06	1.77193e+06	1.79638e+06	1.95222e+06	4.44241e+06	2.08379e+06	98291.4	962465	1.46847e+06	6.0594e+07	127783265	9.97534e+07	27079.3	307795	213784	274163	5393.27	2.58864e+07	2.60543e+06	251373	1.38398e+06	10623.4	3.1987e+07	1.40149e+07	5.27365e+06	332763	164099	1.6076e+08	544313	756732	1.99809e+06	6.42913e+06	1.12974e+06	4.57059e+07	6.01577e+06	4.32609e+06	3.63564e+07	161914	6.2655e+07	6.29848e+07	385828	3.88336e+06	7.93905e+07	1.3273e+08	9.31581e+07
67 M	Positive	694241	27898.1	3.56262e+06	2.72398e+06	228835	599023	1.82669e+06	7.40931e+06	737289	42698.4	401546	710113	5.25598e+07	3.01003e+08	2.19385e+08	312324	743762	225423	390768	1976.71	3.00425e+07	1.27236e+06	110384	906621	15443.1	1.0072e+07	1.10561e+07	1.92216e+06	252344	274750	6.19372e+07	264969	910272	3.18725e+06	5.69148e+06	1.23589e+06	8.32146e+07	2.09661e+06	3.1376e+06	1.59763e+07	402775	6.07795e+07	4.05197e+07	336124	1.73164e+06	3.40944e+07	4.09828e+07	8.16182e+07
70 M	Positive	754779	30819.3	4.05229e+06	3.97807e+06	538687	748741	2.32583e+06	4.91679e+06	797952	79232.2	519276	530749	3.23499e+07	225682004	2.02027e+08	39667.6	856367	264177	300584	12418	2.92172e+07	1.86074e+06	120445	580984	61926.7	1.83487e+07	1.57913e+07	2.24236e+06	272527	143286	1.16997e+08	216168	820185	1.40269e+06	5.56767e+06	1.06693e+06	7.48782e+07	2.67765e+06	2.78835e+06	1.67503e+07	556606	7.41618e+07	3.10073e+07	375128	2.06425e+06	5.07625e+07	4.18119e+07	8.2473e+07
73 M	Positive	389868	881722	4.79491e+06	3.33649e+06	2.40636e+06	889929	2.55273e+06	6.91941e+06	3.90632e+06	75594.1	510804	837680	4.82809e+07	9.25843e+06	3.13227e+08	21499.7	55205	310417	266032	53871.4	1.217e+07	1.50641e+06	147714	628067	42671	7.70925e+06	2.73326e+07	6.38421e+06	365963	332332	4.79816e+07	639438	1.297e+06	2.14121e+06	8.0728e+06	1.24722e+06	1.67856e+08	3.2144e+06	3.10193e+06	2.75321e+07	97406.3	5.61614e+07	5.95531e+07	862081	2.82204e+06	4.25949e+07	9.70605e+07	8.33943e+07
75 M	Positive	569255	159513	5.48432e+06	1.47804e+06	318591	354378	1.81499e+06	8.98827e+06	881750	64620.4	377204	595106	4.82255e+07	1.18403e+08	4.19165e+08	183102	1.08167e+06	206528	400607	22891.2	3.75088e+07	3.73076e+06	59835.6	927139	49541.4	12013172	9.16112e+06	2.15588e+06	260684	270832	1.01982e+08	540289	1.95861e+06	2.20647e+06	6.86666e+06	735383	7.6356e+07	1.36959e+06	2.48681e+06	1.14946e+07	0	6.72392e+07	3.50888e+07	377405	1.43773e+06	1.6853e+07	1.75444e+07	8.90185e+07
78 M	Positive	1.79672e+06	531585	7.94267e+06	4.88589e+06	468469	599022	1.77052e+06	1.82144e+07	4.74335e+06	156946	1.09174e+06	3.25567e+06	4.31169e+07	6.84463e+07	7.99726e+07	34454	241541	264358	322745	50046.9	2.94561e+07	2.19721e+06	215931	825995	99981.1	1.76452e+07	1.75029e+07	9.1991e+06	577581	633688	100179186	1.37384e+06	1.61232e+06	7.26969e+06	2.20565e+07	1.7879e+06	8.63082e+07	1.82089e+06	3.82087e+06	2.77485e+07	131249	9.34911e+07	7.05808e+07	1.17095e+06	3.66907e+06	6.16159e+07	1.11705e+08	193527973
81 M	Positive	1.01068e+06	285143	4.93843e+06	2.32737e+06	792829	1.05597e+06	2.38833e+06	1.03023e+07	3.85734e+06	169718	552264	684217	5.43303e+07	1.61339e+07	3.48919e+08	34095.8	192954	246986	270872	35067.7	1.05939e+07	1.08001e+06	111934	497093	52820.3	1.08855e+07	1.7203e+07	4.15534e+06	359200	557342	8.48485e+07	836147	978571	6.7815e+06	1.14686e+07	964014	1.63019e+08	3.63471e+06	1.98655e+06	1.05939e+07	51861.9	4.84016e+07	4.56802e+07	646051	1.56415e+06	3.25593e+07	6.67708e+07	1.11771e+08
61 M	Positive	600149	20172.5	4.81392e+06	1.30927e+06	1.42025e+06	287968	2.66648e+06	5.92123e+06	1.18683e+06	37238.4	527690	630620	7.10003e+07	1.52924e+08	1.3966e+08	146826	1.19374e+07	182235	198190	16984	6.2808e+07	576870	55026.7	384219	45739.4	2.06759e+07	7.1369e+06	3.10607e+06	176856	261781	1.7477e+08	609241	701524	3.37894e+06	6.56926e+06	689659	5.05037e+07	994976	1.89882e+06	7.88025e+06	376478	4.11178e+07	3.60463e+07	336551	1.04111e+06	1.78671e+07	2.34067e+07	1.95056e+08
64 M	Positive	345996	191414	7.60794e+06	1370897	623525	782823	3.23124e+06	6.87707e+06	2.38398e+06	123311	525512	1.09679e+06	4.50881e+07	6.18651e+07	1.07478e+08	55684.9	85754.3	169948	216760	24075.7	2.56898e+07	648559	62987.5	1.09849e+06	30528.1	3.95832e+07	1.40245e+07	4.73335e+06	453264	414537	196605257	487957	825250	3.69853e+06	7.35123e+06	1.53353e+06	6.10229e+07	2.80909e+06	2.24634e+06	1.99227e+07	191601	1.14424e+08	5.20349e+07	637800	2.04553e+06	1.90052e+07	6.05544e+07	1.14686e+08
66 M	Positive	547122	3983.12	3.74004e+06	4.98721e+06	700857	732584	1.19382e+06	5.4501e+06	707721	88193.8	360057	857997	3.84153e+07	2.13242e+08	2.82029e+08	32838	114545	62817.1	297043	14434.1	1.00007e+07	2.32326e+06	207837	1.33629e+06	32448.1	1.29638e+07	7.46082e+06	3.241e+06	243075	138231	7.4079e+07	419943	591834	2.6218e+06	4.74203e+06	825719	9.17606e+07	2.57746e+06	2.73168e+06	1.38634e+07	331188	1.03711e+08	3.42351e+07	302933	1.62957e+06	6.34963e+07	3.66691e+07	1.0424e+08
68 M	Positive	1.36151e+06	525405	8.6787e+06	4.69959e+06	554514	508996	1.97757e+06	1.59031e+07	6.20975e+06	254164	815193	871362	4.75534e+07	1.99569e+07	8.63758e+07	30931.8	63986.4	285320	427457	25090.5	5.23571e+06	2.02957e+06	236238	1.31103e+06	0	1.91773e+07	1.90214e+07	9.40559e+06	699034	591430	1.18962e+08	845154	1.19813e+06	5.11469e+06	1.87096e+07	1.6005e+06	199251271	1.8506e+06	4833000	3.13385e+07	69007.2	7.74887e+07	4.27201e+07	1.35567e+06	4.90744e+06	5.70641e+07	1.24419e+08	1.74622e+08
71 M	Positive	2.46606e+06	152355	6.37497e+06	6.23866e+06	461049	556040	1.42468e+06	1.83057e+07	3.72488e+06	206433	796489	4.30009e+06	6.27318e+07	2.3123e+07	9.60246e+07	66202.6	106746	832451	659631	45513.4	1.25249e+07	2.82896e+06	235349	1.20095e+06	69552.2	1.70211e+07	2.9439e+07	1.15615e+07	661357	289817	1.17756e+08	1.29467e+06	1.09219e+06	2.51494e+06	2.25877e+07	1.56711e+06	8.46673e+07	1.87229e+06	6.58497e+06	3.26505e+07	147246	4.33556e+07	1.18826e+08	1.98404e+06	1.42378e+07	8.33926e+07	1.4773e+08	1.62717e+08
73A- M	Positive	371460	280550	6.11625e+06	3.73292e+06	2.3579e+06	1.41363e+06	4.59411e+06	5.58736e+06	1.62279e+06	93028.1	331807	1.26681e+06	7.3356e+07	1.30924e+07	2.55109e+08	28155.7	79572.8	97936.3	220911	13254	1.20335e+07	1.71638e+06	173944	1.25671e+06	30703.9	1.11671e+07	1.38625e+07	4.89026e+06	240661	332699	6.33442e+07	760065	845126	3.28724e+06	6.51704e+06	1.28596e+06	1.30848e+08	5.28311e+06	3.1225e+06	2.46445e+07	650522	9.01066e+07	6.88314e+07	684992	2.24289e+06	4.83264e+07	3.90847e+07	1.17447e+08
76 M	Positive	1.51379e+06	952939	8.24772e+06	4.74014e+06	577179	807468	1.96866e+06	1.55776e+07	3.34657e+06	161936	865770	999399	6.62366e+07	1.34246e+08	8.13076e+07	82199.8	21108.1	333797	272544	26008.7	2.43163e+07	2.23156e+06	181320	1.27069e+06	49470.7	1.46911e+07	2.16567e+07	5.43051e+06	448987	771544	5.74979e+07	738691	1.25196e+06	8.23462e+06	1.91238e+07	1.84481e+06	8.76827e+07	2.90455e+06	4.16602e+06	3.14086e+07	187822	9.49856e+07	5.26853e+07	1.2071e+06	3.26921e+06	5.90177e+07	8.67535e+07	1.65908e+08
79 M	Positive	1.43249e+06	286080	7.82831e+06	6.42906e+06	435309	658105	2.02177e+06	1.2046e+07	4.81235e+06	267396	465334	1.74878e+06	6.85827e+07	1.58643e+07	1.06657e+08	140255	119975	406470	298477	56486.6	1.81829e+07	2.973e+06	267532	1.45257e+06	89444.5	1.75728e+07	1.63525e+07	6.2646e+06	626942	410470	9.38435e+07	547352	764678	2.29532e+06	1.36677e+07	1.31701e+06	1.0115e+08	2.32758e+06	4.21992e+06	3.20947e+07	184250	5.77217e+07	7.59047e+07	1.33297e+06	5.56071e+06	8.92063e+07	1.4644e+08	1.50101e+08
81A-M	Positive	1.00497e+06	11246	5.52465e+06	1.56171e+06	880157	791998	4.11287e+06	9.61205e+06	3.63471e+06	168242	481164	976493	5.72189e+07	1.46274e+07	4.00102e+08	54004.9	328841	212232	197162	35007.6	1.52727e+07	785077	77905.6	343099	46957.8	1.07554e+07	1.83918e+07	6.25979e+06	402943	417545	8.2279e+07	928671	1.18068e+06	3.47284e+06	1.0863e+07	1.15462e+06	7.52201e+07	2.81348e+06	3.33094e+06	2.57055e+07	79332.2	4.92599e+07	5.00127e+07	812306	2.03248e+06	2.08655e+07	5.61433e+07	1.21536e+08
84 M	Positive	1.16915e+06	120212	8.27816e+06	9.04329e+06	791790	563925	2.37483e+06	9.64975e+06	3.1409e+06	463047	651291	3.61225e+06	5.18957e+07	3.33093e+07	80192970	175267	51775	601353	1.20322e+06	37763.4	3.23696e+07	3.91231e+06	324611	1.78819e+06	141888	2.20322e+07	2.9237e+07	1.12771e+07	307176	379655	1.11727e+08	1.03661e+06	524430	4.65407e+06	1.10683e+07	1.78373e+06	4.71778e+07	2.17173e+06	3.18468e+06	3.15342e+07	218991	5.40885e+07	1.28434e+08	728454	4.63812e+06	123213157	1.24257e+08	1.03583e+08
85 M	Positive	135950	18824.6	5.07873e+06	2.60552e+06	329645	1.41191e+06	1.14714e+06	1.03238e+07	2.57138e+06	111784	359370	1.29952e+06	7.70648e+07	2.63911e+07	548904917	27791.5	3.11828e+06	177537	273161	14665	1.63581e+07	2.23101e+06	118028	629616	27048.9	2.25779e+06	1.38135e+07	4.57351e+06	251873	352740	2.24651e+07	339893	889941	1.79493e+06	4.60678e+06	1.12368e+06	6.9502e+07	4.54576e+06	2.65355e+06	2.8354e+07	113861	6.08521e+07	3.66421e+07	509024	1.42001e+06	3.228e+07	9.08783e+07	7.99729e+07
88 M	Positive	1.31257e+06	305669	7.05374e+06	4.92665e+06	680489	543714	2.91659e+06	9.26276e+06	2.26333e+06	37771.4	506898	1.34214e+06	4.32616e+07	5.43766e+07	8.12925e+07	34117.3	75652.4	363047	336529	0	9.43291e+06	2.20403e+06	195755	1.15719e+06	15530.2	1.84161e+07	2.14673e+07	4.98758e+06	485067	427979	9.02282e+07	362645	1.08035e+06	4.6993e+06	1.11151e+07	1.50087e+06	1.81098e+08	1.84946e+06	4.14043e+06	1.96148e+07	378170	8.66321e+07	6.02611e+07	1.20436e+06	4.00487e+06	6.85429e+07	7.27928e+07	2.02686e+08
91 M	Positive	222628	1.39312e+06	4.19906e+06	3.58301e+06	293816	618297	2.62032e+06	6.49783e+06	1.33273e+06	36659	372525	789426	2.91e+07	1.21963e+08	8.48749e+07	26058.2	92653.3	171400	266182	3353.5	4.83247e+06	1.67342e+06	122803	1.39677e+06	4136.41	1.39794e+07	2.56051e+07	3.90315e+06	547931	249575	5.49191e+07	300791	542216	1.83903e+06	7.9169e+06	1.59185e+06	1.93461e+08	2.21134e+06	4.70394e+06	3.40926e+07	219273	6.04823e+07	5.20661e+07	889998	4.04654e+06	4.57183e+07	6.19088e+07	2.68889e+08
94 M	Positive	2.12681e+06	378859	8.43994e+06	3.45551e+06	2.10526e+06	306286	2.08586e+06	1.1166e+07	6.01751e+06	156871	452763	1.43178e+06	3.99363e+07	7.175e+07	8.33925e+07	43058.9	108534	460470	400044	89835.1	3.43859e+07	1.65557e+06	124289	852715	142223	2.03066e+07	1.75991e+07	9.87932e+06	679732	428122	9.76071e+07	698449	976906	3.69206e+06	1.35377e+07	1.65374e+06	2.01875e+08	998180	3.6726e+06	3.01892e+07	127421	6.70118e+07	5.69939e+07	1.36075e+06	5.21176e+06	4.71113e+07	1.2211e+08	1.32805e+08
97 M	Positive	1.57462e+06	223837	6.89677e+06	8.3351e+06	1.04437e+06	531766	1.99362e+06	1.12313e+07	2.60243e+06	224523	544156	1.58698e+06	4.93756e+07	3.78263e+07	9.55724e+07	61241.8	49751.9	280107	377168	17673	2.00257e+07	3.85653e+06	354557	1.24713e+06	61604.7	1.10194e+07	1.79066e+07	7.40204e+06	407645	396505	6.2726e+07	605082	628807	5.93729e+06	1.32445e+07	1.3432e+06	1.0766e+08	1.73271e+06	3.35947e+06	1.88602e+07	199756	8.9427e+07	6.30439e+07	1.15246e+06	3.03161e+06	1.17611e+08	8.39173e+07	2.27806e+08
100 M	Positive	1.76439e+06	129976	5.65038e+06	7.14255e+06	814430	385514	1.38668e+06	8.33451e+06	2.68843e+06	155159	582620	1.37856e+06	5.3949e+07	2.70168e+07	1.08406e+08	26592.5	154926	403764	426696	67581.9	2.90495e+07	3.27944e+06	334800	864963	102196	1.96486e+07	1.39742e+07	5.40717e+06	540751	431653	1.16875e+08	687247	711552	5.31761e+06	9.31615e+06	1.04812e+06	1.59883e+08	1.41778e+06	3.73821e+06	3.13362e+07	134776	7.09721e+07	6.606e+07	912920	3.26043e+06	9.48554e+07	1.16875e+08	1.59222e+08
105 M	Positive	1.18674e+06	0	4.68829e+06	4.70973e+06	366737	553867	1.44056e+06	6.97934e+06	2.00521e+06	37520.6	314107	1.39489e+06	3.77141e+07	3.30398e+07	2.62526e+08	33018.6	193283	414037	397787	2205.34	1.96574e+07	2.16754e+06	206988	528757	41022.3	1.00528e+07	1.4663e+07	5.7424e+06	396989	107240	7.04337e+07	635914	891934	1.15907e+06	8.83623e+06	1.39264e+06	9.64493e+07	1.89108e+06	3.8152e+06	2.98383e+07	189848	4.70625e+07	6.91531e+07	547939	3.33069e+06	6.21097e+07	8.64414e+07	2.17064e+08
108 M	Positive	1.07243e+06	286328	7.62725e+06	9.13224e+06	780421	419933	1.53696e+06	1.57612e+07	4.50058e+06	835185	734357	2.36104e+06	7.09886e+07	3.19007e+07	1.18777e+08	23003.3	60827.4	278727	612351	142256	2.48397e+07	4.11236e+06	341245	1.07077e+06	126920	1.92918e+07	2.26962e+07	4.6488e+06	736364	729692	1.15751e+08	447630	911235	7.97297e+06	1.80309e+07	2.09818e+06	8.51892e+07	1.46088e+06	3.68027e+06	3.06398e+07	177438	6.65755e+07	9.97371e+07	1.37918e+06	4.58887e+06	8.96499e+07	109446047	1.2029e+08
111 M	Positive	1.21597e+06	179121	5.59651e+06	2.98455e+06	1.18306e+06	1.2856e+06	2.51675e+06	1.86991e+07	3.56195e+06	97355.9	555743	843755	5.79192e+07	1.71648e+07	1.79319e+08	55692.5	2.25267e+06	349537	275533	58300.3	1.97539e+07	1.46148e+06	150730	611264	82225.5	1.90826e+07	1.29455e+07	3.20553e+06	224390	416210	9.58927e+07	584348	1.55979e+06	5.23811e+06	1.04523e+07	1.07803e+06	1.13134e+08	4.54573e+06	2.2971e+06	2.10964e+07	108057	6.64536e+07	5.05354e+07	464413	1.7731e+06	4.10421e+07	9.97284e+07	146715803
86 M	Positive	1.12577e+06	30421.4	7.2203e+06	3.58204e+06	449182	1.32288e+06	2.36756e+06	1.29041e+07	2.06963e+06	93922.8	1.19232e+06	1.4752e+06	3.2838e+07	4.35272e+07	1.71413e+08	38395.8	421767	215162	206640	11118	1.82005e+07	1.60847e+06	140548	1.27069e+06	21379.4	2.70601e+07	1.75265e+07	6.96341e+06	573581	237844	1.52153e+08	671428	1.34787e+06	3.47162e+06	1.68524e+07	1.81834e+06	8.89799e+07	4.51516e+06	6.65575e+06	2.88898e+07	248744	5.88388e+07	5.96092e+07	548516	7.69399e+06	4.52606e+07	7.36689e+07	1.57931e+08
89 M	Positive	502169	23058.6	5.98954e+06	2.6387e+06	553000	512235	2.50805e+06	7.00123e+06	1.63199e+06	56768.8	437419	1.1422e+06	5.75747e+07	2.81267e+08	5.70084e+07	137324	304180	59330.3	172922	14715.1	2.73716e+07	1.23233e+06	113026	578952	12674.5	1.63286e+07	9.81601e+06	4.35894e+06	290556	258062	9.36297e+07	480353	856929	2.63296e+06	9.03769e+06	1.06454e+06	1.09992e+08	1.95312e+06	4.52261e+06	1.36858e+07	397691	5.12509e+07	6.00287e+07	475369	3.48441e+06	3.41673e+07	3.45448e+07	127419406
92 M	Positive	1.82122e+06	323358	8.13298e+06	7.9468e+06	711541	412318	2.04654e+06	1.77786e+07	5.0305e+06	10492	743046	1.08307e+06	3.23247e+07	3.6042e+07	9.47114e+07	39092.7	90753.1	297285	485279	16542	4.67945e+06	3.4312e+06	256707	733358	63789.8	2.13343e+07	2.00413e+07	1.15745e+07	621903	565892	1.07318e+08	1.8813e+06	916569	6.61429e+06	2.06878e+07	2.03507e+06	6.68655e+07	1.37881e+06	2.94226e+06	2.58598e+07	88386.4	8.87313e+07	5.30125e+07	1.48577e+06	4.12214e+06	9.66509e+07	1.12652e+08	2.08494e+08
95 M	Positive	1.30486e+06	68204.9	5.80519e+06	3.6426e+06	785261	2.33277e+06	4.38035e+06	1.08194e+07	1.92977e+06	54861.4	883244	2.59148e+06	100833949	5.6852e+07	1.24224e+08	32585.8	89642.7	106224	297316	6058.68	1.82419e+07	1.67729e+06	167265	847029	90124.5	9.21755e+06	1.07904e+07	2.84325e+06	254310	505619	5.62924e+07	1.00912e+06	968520	5.21658e+06	1.27581e+07	1.431e+06	8.03218e+07	7.82164e+06	3.47518e+06	1.25343e+07	341656	8.79639e+07	5.89783e+07	430486	1.75714e+06	5.02491e+07	4.28628e+07	1.51083e+08
98 M	Positive	914788	181683	1.14847e+07	7.03157e+06	1.16678e+06	518173	2.07591e+06	1.85906e+07	2.65641e+06	91030.4	906261	2.1529e+06	5.12901e+07	1.74287e+07	68220754	54621.6	204802	119827	362630	5796.63	2.90478e+07	3.17167e+06	301527	1.87661e+06	3303.37	1.37313e+07	1.82586e+07	8.41466e+06	638015	1.08127e+06	8.10018e+07	417933	1.11669e+06	1.31071e+07	2.10804e+07	1.95256e+06	1.18314e+08	1.58295e+06	5.12099e+06	2.45661e+07	445822	8.23297e+07	9.47787e+07	1.89558e+06	6.64869e+06	8.54834e+07	8.76413e+07	1.53206e+08
106 M	Positive	585283	741612	4.95697e+06	3.60937e+06	2.19722e+06	673779	1.71497e+06	6.79361e+06	2.995e+06	99588.4	562154	1.66063e+06	3.6084e+07	2.23377e+07	8.67735e+07	35085.5	0	334873	488251	18928	2.06195e+07	1.61298e+06	126175	650489	13722.1	1.36604e+07	2.09631e+07	6.12128e+06	387439	424506	5.69612e+07	524081	795589	3.14191e+06	8.312e+06	1.07322e+06	3.01727e+08	2.44659e+06	5.04406e+06	3.80601e+07	134833	5.76485e+07	6.77864e+07	811102	3.49809e+06	5.06895e+07	1.17703e+08	1.75265e+08
109 M	Positive	364038	15786.6	3.1657e+06	2.96597e+06	3.59611e+06	705827	1.91078e+06	8.74139e+06	2.30917e+06	180538	376592	749282	3.97089e+07	1.38236e+08	2.47334e+08	33077.1	1.15617e+06	171115	498517	47817.7	2.67663e+07	1.47511e+06	124896	584482	67945	2.34459e+07	1.18585e+07	3.2923e+06	252915	221886	1.32815e+08	345765	1.46365e+06	2.68372e+06	5.51425e+06	1.23829e+06	1.19306e+08	2.31151e+06	2.82004e+06	2.69696e+07	109571	5.0822e+07	3.51011e+07	393437	3.01264e+06	3.86247e+07	1.00966e+08	6.38325e+07
90 M	Positive	951554	96383.8	5.42225e+06	1.87384e+06	7.96665e+06	1.35749e+06	2.4152e+06	1.01833e+07	5.43014e+06	241281	948024	1.53774e+06	6.20028e+07	1.98013e+07	146034555	72169.1	341325	176739	188410	28431.8	2.75981e+07	961845	94696.6	830271	6299.9	1.52222e+07	1.68311e+07	2.92844e+06	382103	831894	9.29423e+07	503813	942673	5.69712e+06	1.03548e+07	964921	2.10194e+08	4.81361e+06	2.92425e+06	1.78212e+07	56922.8	6.0889e+07	6.36117e+07	884687	2.26172e+06	2.42566e+07	1.23758e+08	1.47272e+08
93 M	Positive	530454	386753	7.31812e+06	4.42793e+06	3.63874e+06	608053	1.80036e+06	9.5345e+06	4.35092e+06	298540	592662	1.63564e+06	3.99677e+07	1.16669e+07	1.16669e+08	37231.6	395481	250134	280961	33060.8	1.72115e+07	1.89987e+06	175856	636063	42418.4	2.17166e+07	2.33338e+07	7.40024e+06	630017	1.68411e+06	1.27065e+08	561137	952758	4.37967e+06	1.00667e+07	1.14283e+06	2.11673e+08	2.09609e+06	3.96875e+06	3.70799e+07	145901	1.01652e+08	6.66514e+07	1.52949e+06	3.80089e+06	4.90933e+07	1.17824e+08	1.06388e+08
96 M	Positive	1.70356e+06	162158	4.22496e+06	4.50461e+06	2.37287e+06	733031	2.01238e+06	1.38309e+07	3.85434e+06	161781	565306	2.0456e+06	5.9906e+07	2.68286e+07	9.83158e+07	1.49973e+07	110164	473057	369734	26669.8	1.27477e+07	2.07348e+06	195203	409743	50067.3	1.6997e+07	2.2496e+07	6.54998e+06	485377	258381	134975954	1.05179e+06	1.28197e+06	3.05107e+06	1.68303e+07	1.51519e+06	2.06696e+08	2.62419e+06	3.42308e+06	2.38291e+07	63510.2	5.45736e+07	8.5818e+07	1.16593e+06	4.32223e+06	5.73231e+07	9.58163e+07	1.24145e+08
99 M	Positive	484037	496128	5.33105e+06	3.33633e+06	2.43051e+06	455831	1.80334e+06	1.11293e+07	3.10695e+06	186924	562167	920786	3.39015e+07	7.5508e+07	5.85572e+07	26730.2	213980	189760	200397	107670	6.83167e+07	1702321	125618	600995	268434	1.21566e+07	1.37832e+07	6.1366e+06	288396	629157	4.62294e+07	353107	554055	7.05444e+06	6.27492e+06	1.14861e+06	3.04203e+08	1.6555e+06	2.8666e+06	2.66247e+07	94939.7	6.53204e+07	4.37467e+07	859807	1.8257e+06	4.59725e+07	1.06156e+08	1.60091e+08
102 M	Positive	688951	17692.5	3.43858e+06	2.30455e+06	2.95062e+06	1.79046e+06	1.6064e+06	7.44006e+06	2.73341e+06	84911	870497	2.75976e+06	1.04452e+08	1.72945e+07	3.95546e+08	55164.2	181197	219427	545532	68346.5	3.42464e+07	8.56161e+06	99561.1	584448	79847.5	2.90552e+06	1.08732e+07	2.54834e+06	571163	207937	2.61129e+07	2.2394e+06	762567	4.84902e+06	8.64723e+06	1.17282e+06	1.15184e+08	5.94048e+06	2.60655e+06	2.23458e+07	77352.6	4.60615e+07	1.19006e+08	563219	4.11867e+06	3.45033e+07	9.93147e+07	6.81504e+07
104 M	Positive	636044	173395	4.95033e+06	4.39895e+06	7.50782e+06	527499	2.38426e+06	1.0734e+07	3.64788e+06	119918	580076	991557	4.75495e+07	3.08836e+07	1.06398e+08	41286.1	46244.7	241806	266489	35762.6	1.18638e+07	2.03176e+06	159190	608248	49546	1.48769e+07	2.49517e+07	5.11112e+06	649750	661103	9.79238e+07	402366	1.59304e+06	3.19442e+06	1.3182e+07	1.4589e+06	2.37419e+08	1.8602e+06	2.66954e+06	2.42926e+07	27000.6	7.82449e+07	4.91502e+07	1.37559e+06	3.86377e+06	5.42347e+07	9.2086e+07	1.61951e+08
107 M	Positive	869110	257628	5.27467e+06	3.09665e+06	3.79765e+06	383029	3.75985e+06	1.3858e+07	4.38436e+06	201399	405728	805616	4.26776e+07	7.62801e+07	7.13746e+07	56097.1	290752	151551	219056	19223.1	2.12162e+07	1.34806e+06	139389	458466	9159.28	2.12162e+07	1.42259e+07	5.19918e+06	403744	762459	1.15769e+08	349083	1.54149e+06	5.99873e+06	1.61881e+07	1.07818e+06	1.6137e+08	1.18335e+06	2.37147e+06	1.5207e+07	112620	4.45171e+07	3.69137e+07	1.76742e+06	3.68745e+06	4.03475e+07	8.76853e+07	1.83955e+08
113 M	Positive	905404	109881	4.16182e+06	3.49944e+06	4.41767e+06	423199	1.91847e+06	6.85808e+06	2.66819e+06	141241	455231	2.18067e+06	8.47567e+07	2.05495e+07	1.13542e+08	47862.6	140665	295840	860337	21476.2	2.69462e+07	8.31576e+06	146898	753237	41366.7	1.81507e+07	1.87105e+07	5.0137e+06	390302	278259	1.26336e+08	1.41567e+06	869360	4.70999e+06	7.77446e+06	1.60557e+06	1.82702e+08	1.31678e+06	3.0055e+06	3.11841e+07	86445.6	4.98945e+07	6.62862e+07	850212	2.79788e+06	4.63763e+07	1.31933e+08	1.14342e+08
114 M	Positive	453030	131542	6.38934e+06	5.92662e+06	2.5607e+06	886876	2.44184e+06	8.62156e+06	4.45596e+06	205012	569050	1.19472e+06	4.57107e+07	1.55443e+07	1.31204e+08	178453	506930	166814	325638	52317.3	1.58078e+07	2.76176e+06	241286	657376	59997.7	2.02866e+07	1.87058e+07	7.24185e+06	386795	462090	1.08547e+08	552875	553605	5.78234e+06	9.78467e+06	1.40527e+06	2.38751e+08	3.11639e+06	3.32391e+06	2.66097e+07	104695	7.33743e+07	3.51722e+07	714075	2.78191e+06	7.61407e+07	9.27388e+07	1.233e+08
117 M	Positive	549169	337541	3.8739e+06	5.49759e+06	3.99979e+06	862803	1.70861e+06	6.22409e+06	2.50297e+06	116780	529179	947587	4.68697e+07	7.38266e+07	7.38266e+07	46116.4	75973.3	284884	223983	49349.1	2.30962e+07	2.45613e+06	223715	674413	62856.6	1.74746e+07	2.1132e+07	5.04993e+06	386283	541782	9.21139e+07	257900	600444	3.75024e+06	7.11174e+06	1.2699e+06	2.5727e+08	2.9985e+06	3.54812e+06	2.97338e+07	94756.2	5.92645e+07	4.65311e+07	657065	2.64687e+06	7.38266e+07	1.39526e+08	1.36139e+08
120 M	Positive	521966	126467	5.2502e+06	4.4448e+06	2.19344e+06	1.07673e+06	2.50075e+06	9.83657e+06	2.88835e+06	278932	608200	836193	8.25085e+07	9.24298e+06	2.29803e+08	25213.9	202749	333125	253093	54690.8	2.07755e+07	2.04734e+06	184451	550481	95464.3	1.12781e+07	1.91644e+07	6.40654e+06	410039	456003	7.32655e+07	707386	1.0746e+06	4.58073e+06	7.58994e+06	1.01029e+06	1.77292e+08	3.70859e+06	3.1205e+06	2.56938e+07	108740	7.47919e+07	4.52821e+07	698451	2.24487e+06	5.68995e+07	8.90379e+07	1.04302e+08
123 M	Positive	787844	110928	4.7728e+06	4.86643e+06	2.85343e+06	755400	1.68585e+06	8.77706e+06	3.11187e+06	396794	401124	1.31822e+06	4.10128e+07	1.20485e+07	1.93893e+08	45061	122518	248714	160048	72136.5	2.7927e+07	2.2414e+06	175000	802124	190177	1.77935e+07	1.57987e+07	5.65076e+06	368990	382658	1.04527e+08	568393	752410	7.47555e+06	9.49518e+06	1.3216e+06	1.98668e+08	2.65007e+06	2.58767e+06	2.59322e+07	79755.3	7.269e+07	5.03484e+07	741923	2.1815e+06	6.17586e+07	110910075	1.09314e+08
126 M	Positive	779882	124285	5.88954e+06	6.44314e+06	1.89795e+06	381675	2.67664e+06	1.33248e+07	2.53104e+06	119026	824182	1.16449e+06	5.29264e+07	1.57475e+07	1.46293e+08	42132.3	75709.2	184070	357664	43156.3	1.52816e+07	3.11507e+06	275525	1.55623e+06	92025.1	1.2393e+07	1.2393e+07	9.30357e+06	526640	249726	7.01648e+07	1.00458e+06	1.26401e+06	3.24774e+06	1.51884e+07	1.67777e+06	1.59102e+08	1.32929e+06	5.05229e+06	3.41972e+07	177300	40347077	6.62512e+07	1.16786e+06	4.87597e+06	8.526e+07	1.37907e+08	1.20203e+08
132 M	Positive	1.39712e+06	32869.1	6.73343e+06	6.17499e+06	4.19533e+06	523118	1.78611e+06	7.30153e+06	3.82857e+06	132681	679492	1.3922e+06	4.42554e+07	5.33286e+07	8.26779e+07	31638.9	135486	273827	208110	40305.9	4.17556e+07	2.90171e+06	223094	737565	86436	1.97205e+07	1.23137e+07	5.69894e+06	329193	743978	9.72137e+07	428064	421257	3.68291e+06	8.18379e+06	1.04393e+06	2.52652e+08	1.61686e+06	2.92343e+06	2.79605e+07	127812	8.1104e+07	4.95327e+07	944140	2.33671e+06	8.07336e+07	1.16656e+08	1.16656e+08
135 M	Positive	1.23962e+06	200416	5.22928e+06	6.06079e+06	1.83823e+06	935645	1.93564e+06	1.19749e+07	2.41789e+06	1.38288e+06	303638	1.52531e+06	5.07807e+07	8.84474e+06	1.01742e+08	47450.1	172073	562773	286154	230303	5.66331e+07	2.75624e+06	300516	1.1332e+06	434724	1.43158e+07	2.78214e+07	7.20375e+06	538649	555940	8.21135e+07	537252	667819	2.96068e+06	1.42258e+07	1.39742e+06	1.5749e+08	3.6318e+06	3.23818e+06	4.47483e+07	168363	7.69814e+07	7.89622e+07	819032	4.39756e+06	8.48146e+07	1.17048e+08	1.44059e+08
141 M	Positive	647750	372441	4.05934e+06	4.52236e+06	3.4779e+06	531190	2.25423e+06	8.44649e+06	3.42665e+06	1.47356e+06	364866	1.4489e+06	28334144	1.65858e+08	9.29114e+07	50308.1	178849	224861	238080	254067	1.88894e+07	2.04216e+06	212488	457931	276662	1.88894e+07	1.2593e+07	4.84798e+06	394086	219315	8.83042e+07	152273	765879	2.42714e+06	1.07501e+07	1.02553e+06	2.3894e+08	1.86396e+06	2.4151e+06	2.64913e+07	29008.9	3.60896e+07	4.57646e+07	729523	2.64929e+06	5.9663e+07	9.67507e+07	1.14412e+08
115 M	Positive	2.45372e+06	262425	6.8167e+06	4.05794e+06	2.78119e+06	866451	1.28286e+06	1.54199e+07	3.47822e+06	278868	822799	1.12485e+06	5.88106e+07	2.91662e+07	8.72596e+07	33238.3	151546	328654	554003	106542	2.24723e+07	1.79779e+06	164271	1.37797e+06	221160	1.50613e+07	1.67347e+07	9.77317e+06	784699	511737	9.44317e+07	679704	1.25029e+06	5.09437e+06	1.86473e+07	1.84221e+06	2.45953e+08	3.17932e+06	4.27262e+06	2.71342e+07	111489	6.26357e+07	5.00846e+07	1.25154e+06	5.621e+06	5.3073e+07	1.2551e+08	1.74519e+08
118 M	Positive	645022	117556	4.81048e+06	3.96546e+06	5.27166e+06	746539	2.001e+06	8.0098e+06	2951468	239853	665650	1.50524e+06	4.27244e+07	2.2291e+07	7.35072e+07	46855.7	68428.6	230451	233671	81201.9	2.12295e+07	2.31663e+06	190981	574298	95731.3	1.87527e+07	1.61875e+07	6.29372e+06	484334	559452	101724796	380021	1.2326e+06	5.76968e+06	8.66463e+06	1.40562e+06	3.22857e+08	2.60261e+06	3.34532e+06	2.80407e+07	32263.1	5.1747e+07	6.11233e+07	941844	2.8377e+06	6.25386e+07	9.111e+07	1.80451e+08
121 M	Positive	710916	1.34835e+06	5.62421e+06	5.19992e+06	5.46292e+06	957502	2.2113e+06	9.36431e+06	3.89533e+06	121589	808686	2.12981e+06	4.20821e+07	2.66107e+07	8.54019e+07	65134.3	55293.8	355188	620748	47847	40638119	2.54911e+06	246194	389629	141415	2.11442e+07	2.26913e+07	5.38543e+06	548891	580624	9.73665e+07	518931	653788	7.38986e+06	1.13457e+07	1.14073e+06	2.47545e+08	3.4206e+06	4.66427e+06	2.94987e+07	69816.8	5.42529e+07	8.74648e+07	956306	4.27367e+06	7.14777e+07	7.36437e+07	1.40274e+08
124 M	Positive	379654	224233	6.13696e+06	3.93156e+06	4.62301e+06	781621	2.41363e+06	1.1942e+07	3.82288e+06	604356	958455	2.5613e+06	5.65575e+07	1.63367e+07	1.07956e+08	43537.5	214830	212822	209782	232503	6.66844e+07	1.87212e+06	154357	609414	271672	1.57635e+07	1.60501e+07	3.58599e+06	385237	1.11993e+06	8.4072e+07	529249	935416	2.2451e+07	5.956e+06	1.11787e+06	1.92425e+08	2.6182e+06	2.62361e+06	1.98716e+07	34996.1	7.81487e+07	4.64307e+07	952172	2.29083e+06	5.12075e+07	1.07001e+08	1.22286e+08
127 M	Positive	1.3355e+06	588117	5.43135e+06	6.73825e+06	6.01393e+06	399437	2.53175e+06	8.97017e+06	3.0705e+06	168301	746948	1.66255e+06	5.1061e+07	2.6738e+07	6.97776e+07	46902.4	53233.7	469490	1.02462e+06	247793	4.57134e+07	3.10179e+06	302831	805092	601583	1.4749e+07	2.25979e+07	6.79984e+06	326256	294283	7.28826e+07	1.10834e+06	396757	3.69429e+06	1.08677e+07	1.42434e+06	228629816	1.38239e+06	3.71736e+06	2.69968e+07	78779.6	4.96809e+07	7.41764e+07	685050	3.04242e+06	8.97017e+07	1.45765e+08	1.12127e+08
130 M	Positive	2.92743e+06	49726.5	5.14525e+06	5.51255e+06	2.70015e+06	629871	2.31676e+06	1.0788e+07	3.30723e+06	173068	747586	1.13241e+06	4.90852e+07	1.32152e+07	9.34956e+07	52029.9	240713	818137	227524	48406.1	1.8789e+07	2.56871e+06	230886	794428	100978	1.46536e+07	1.82496e+07	5.91068e+06	418820	256738	8.62137e+07	714572	683580	2.87615e+06	1.1687e+07	1.26256e+06	2.21788e+08	2.16861e+06	4.51009e+06	3.2274e+07	128940	6.6256e+07	4.98943e+07	843343	2.41999e+06	7.29086e+07	1.33051e+08	1.54627e+08
136 M	Positive	1.16179e+06	178358	5.83307e+06	5.753e+06	7.04887e+06	633087	2.78813e+06	8.82991e+06	3.04244e+06	176580	554290	1.27182e+06	3.89328e+07	1.5552e+07	1.53404e+08	42615.5	92930.6	496775	555002	118239	1.79853e+07	2.70433e+06	245018	672539	212375	1.5552e+07	2.01012e+07	6.34055e+06	413044	319309	9.37351e+07	525706	451397	2.3794e+06	1.12144e+07	1.17759e+06	1.93171e+08	1.93727e+06	3.48128e+06	2.39098e+07	39312.6	7.43744e+07	5.60718e+07	781666	3.19582e+06	7.50092e+07	9.27829e+07	111085567
142 M	Positive	697570	300726	3.43617e+06	4.1347e+06	4.7634e+06	557010	2.12125e+06	8.91807e+06	4.14447e+06	349989	433454	467996	4.32369e+07	1.00528e+08	1.04432e+08	45909.3	50213.3	242664	167058	40010.4	1.13216e+07	1.82994e+06	169829	435456	80600.5	2.84017e+07	1.66896e+07	8.87801e+06	526466	258546	175680403	259306	974354	1.19041e+06	1.14192e+07	1.4503e+06	1.92373e+08	1.87712e+06	3.04639e+06	26156860	38533.6	9.85762e+07	2.44001e+07	866120	3.07781e+06	5.78769e+07	8.60834e+07	8.89138e+07
116 M	Positive	947427	319751	4.47062e+06	6.36156e+06	1.37921e+06	550108	985122	8.42761e+06	2.25963e+06	67818.7	648890	1.35648e+06	5.5263e+07	6.52103e+07	5.67137e+07	41220.9	123766	377799	194774	9683.6	7.73682e+06	3.05725e+06	255976	930871	9344.43	1.63026e+07	1.49901e+07	6.30988e+06	435862	210206	1.04309e+08	623198	471600	1.45635e+06	1.10526e+07	1.04851e+06	238266569	2.07902e+06	3.89986e+06	3.82696e+07	155197	5.67137e+07	5.67137e+07	999016	3.98669e+06	8.91116e+07	167861367	1.46447e+08
122 M	Positive	555226	219542	5.56987e+06	4.94698e+06	933846	722247	1.74092e+06	9.97231e+06	2.73663e+06	162529	766118	821675	5.57324e+07	1.31892e+08	1.59235e+08	43718.5	145385	243711	690799	27204.3	4.70468e+07	2.26619e+06	264644	746605	11134.4	2.17943e+07	1.31088e+07	2.08944e+06	323816	375740	108569543	641322	846174	3.54717e+06	6.66239e+06	1.20782e+06	8.17167e+07	2.56844e+06	3.51083e+06	4.04522e+07	203938	6.80369e+07	4.56796e+07	591473	2.933e+06	6.98062e+07	1.19829e+08	1.0294e+08
125 M	Positive	1.0014e+06	29887.8	5.52879e+06	7.62122e+06	2.7061e+06	274799	2.46139e+06	6.51164e+06	3.32262e+06	159476	556779	1.58668e+06	4.15093e+07	2.12488e+07	6.49819e+07	44013.7	57378.3	343189	873581	36587.2	1.4413e+07	3.52442e+06	337516	1.0682e+06	27880	2.01782e+07	1.12833e+07	7.71486e+06	310255	234496	1.08715e+08	502939	579841	2.41207e+06	7.62304e+06	1.50323e+06	2.35654e+08	986153	3.3042e+06	3.42617e+07	126610	6.66291e+07	5.46869e+07	738284	2.96264e+06	9.6361e+07	151542045	1.18598e+08
128 M	Positive	779199	72412	5.46023e+06	5.95287e+06	1.6407e+06	1.02218e+06	2.23932e+06	2.88674e+07	3.2145e+06	327231	379636	1.74353e+06	4.65241e+07	1.09304e+07	1.23317e+08	74560.1	386890	762758	137567	32276.2	233484	2.84318e+06	268055	710245	0	1.81239e+07	2.54108e+07	6.87115e+06	337615	390692	8.1464e+07	549052	447193	5.57304e+06	1.10238e+07	1.32544e+06	1.4943e+08	3.60191e+06	3.3848e+06	2.61582e+07	127902	1.12106e+08	7.40836e+07	416602	2.48169e+06	8.1464e+07	1.2612e+08	1.39199e+08
131 M	Positive	2.70615e+06	141154	8.02874e+06	6.55368e+06	2.0932e+06	519774	1.9019e+06	1.57635e+07	4.19663e+06	95167.9	902916	2.21431e+06	4.9581e+07	4.14972e+07	9.37728e+07	49253.5	187644	502122	477788	32629.1	1.42815e+07	3.13101e+06	259575	1.66783e+06	55765.4	2.61378e+07	2.41169e+07	1.23217e+07	563653	366579	1.16003e+08	826245	763403	4.47258e+06	1.89971e+07	1.67037e+06	1.48924e+08	1.66768e+06	4.65403e+06	2.62726e+07	127364	6.15721e+07	8.59584e+07	1.43923e+06	5.85721e+06	8.64973e+07	1.23818e+08	1.36078e+08
134 M	Positive	800200	282929	3.80379e+06	3.4775e+06	3.31226e+06	825328	1.73768e+06	6.07272e+06	2.27896e+06	1.40313e+06	697402	847544	2.68309e+07	1.49708e+07	1.13416e+08	1.91834e+07	108426	276793	175167	53353.3	1.71744e+07	1.72798e+06	139595	567404	81255.3	2.11277e+07	1.50357e+07	4.8896e+06	337069	241787	1.08879e+08	1.19082e+06	765623	1.52838e+06	7.3234e+06	1.29527e+06	3.05133e+08	2.92059e+06	3.07868e+06	3.06546e+07	97556.3	8.36034e+07	4.32923e+07	527034	2.28524e+06	4.63383e+07	1.04342e+08	1.27673e+08
137 A- M	Positive	813214	63245.4	7.77342e+06	7.69565e+06	787755	907827	2.17577e+06	6.67661e+06	3.15109e+06	112330	634394	1.7449e+06	4.51577e+07	5.10399e+07	8.06322e+07	21516.2	91291.9	304206	398629	140220	1.89137e+07	3.47411e+06	339756	1.35364e+06	339146	2.24431e+07	1.1674e+07	4.95123e+06	330264	288036	101355901	418796	945010	2.69043e+06	8.09771e+06	1.37103e+06	1.51463e+08	3.1934e+06	4.02199e+06	3.46601e+07	214819	8.06322e+07	5.77367e+07	584178	4.04587e+06	101355901	1.56559e+08	1.21265e+08
143 M	Positive	1.12217e+06	303956	6.18866e+06	5.60794e+06	7.7708e+06	791458	2.45691e+06	1.35587e+07	3.28653e+06	1.52308e+06	565446	1.98321e+06	5.45477e+07	4.33879e+07	8.05179e+07	42251.7	83233.5	239400	254218	255281	2.96206e+07	2.49334e+06	162375	667675	312661	2.07553e+07	2.07553e+07	6.33195e+06	377280	516959	1.05341e+08	450720	673099	6.29411e+06	1.50189e+07	1.28782e+06	199849039	2.78878e+06	3.38543e+06	2.11724e+07	75287.2	7.36342e+07	8.57328e+07	969328	3.09143e+06	7.49901e+07	1.10556e+08	9.89786e+07
144 M	Positive	532520	28320.5	3.49719e+06	6.10474e+06	3.58543e+06	1.04088e+06	2.20901e+06	8.22503e+06	2.27085e+06	667811	635735	913122	4.20972e+07	6.52903e+06	123375405	30357.3	37043.6	193581	172512	106482	9.27185e+06	3.26071e+06	239487	736895	165532	1.96653e+07	1.71978e+07	4.59276e+06	340131	207024	1.22628e+08	552287	524196	2.56258e+06	1.06925e+07	1.5743e+06	2.05897e+08	3.75894e+06	3.69357e+06	2.38526e+07	68431.1	7.40252e+07	4.52376e+07	603713	2.23293e+06	8.2998e+07	1.2188e+08	1.17394e+08
147 M	Positive	1.03703e+06	67861.8	3.91039e+06	7.64465e+06	711212	299626	1.43085e+06	7.94153e+06	2.66031e+06	1.17722e+06	464770	1.89819e+06	2.78325e+07	8.46107e+07	5.58134e+07	11351.1	103452	391357	348667	118275	6.83559e+06	2.7884e+06	371763	973571	215537	1.96683e+07	1.58831e+07	6.98375e+06	286805	228914	1.12072e+08	528277	787628	2.45395e+06	1.00939e+07	1.19607e+06	2.70271e+08	1.0654e+06	4.89906e+06	2.61996e+07	104701	4.13405e+07	7.02863e+07	749078	2.74841e+06	8.53529e+07	1.38049e+08	142502300
150 M	Positive	671592	241571	4.29894e+06	3.89133e+06	1.2767e+06	527351	1.67334e+06	8.27167e+06	2.97951e+06	158816	270952	1.35964e+06	4.62722e+07	1.31036e+07	9.09065e+07	13814.5	136541	294040	269475	71881.7	1.85089e+07	1.83108e+06	154977	856606	163040	2.60435e+07	2.07201e+07	4.73426e+06	427331	425824	1.39226e+08	426607	1.01317e+06	4.29109e+06	7.91543e+06	1.29897e+06	2.91349e+08	1.94084e+06	3.39795e+06	3.52979e+07	105637	7.58373e+07	6.59277e+07	864692	2.90162e+06	4.97119e+07	1.13838e+08	1.17933e+08
163 M	Positive	206644	2237.37	2.61762e+06	2.94669e+06	353766	704924	1.11978e+06	7.02299e+06	1.52116e+06	222207	1.15059e+06	815170	9.5576e+07	22917120	1.81647e+08	11626.9	170062	226244	437142	61830.1	4.12403e+07	4.30509e+06	124370	657634	73553.6	1.70558e+07	2.02241e+07	387209	287619	751344	1.17226e+08	342824	907021	2.20645e+06	6.07251e+06	1.41084e+06	231634896	2.49757e+06	5.28044e+06	3.0521e+07	120116	8.55432e+07	4.01314e+07	561998	2.96046e+06	3.83888e+07	1.09833e+08	77094459
166 M	Positive	914256	0	3.61051e+06	2.52125e+06	553492	713440	2.07468e+06	2.45275e+07	2.42275e+06	1.6471e+06	249894	500961	4.17683e+07	115155520	1.6395e+08	25163.7	208340	117161	93905.6	435116	2.5113e+07	1.18496e+06	100519	335359	251973	2.91467e+07	7.93727e+06	2.50286e+06	176663	338938	2.03637e+08	493526	772587	1.57844e+06	5.04006e+06	925983	1.50616e+08	2.59473e+06	1.43236e+06	1.53541e+07	52028	4.1508e+07	2.82359e+07	363556	1.21378e+06	3.50671e+07	6.3303e+07	1.0865e+08
169 M	Positive	1.24358e+06	63034.4	6.37986e+06	6.35518e+06	1.6711e+06	288326	1.55294e+06	1.18591e+07	2.39929e+06	164143	927449	2.9943e+06	4.31158e+07	2.142e+07	8.00722e+07	22774.6	25907	329273	1.0359e+06	28787.8	4.82619e+06	2.9802e+06	315902	1.98167e+06	54578	2.21555e+07	1.52606e+07	8.2175e+06	430359	271640	1.16753e+08	1.51731e+06	402222	3.31487e+06	1.30543e+07	1.70093e+06	1.70385e+08	1.0325e+06	3.89674e+06	1.82943e+07	113163	4.90914e+07	110317644	599075	4.13877e+06	8.3106e+07	1.16753e+08	2.12361e+08
145 M	Positive	1.91104e+06	596444	5.96357e+06	7.69136e+06	5.4445e+06	533600	1.41559e+06	1.48984e+07	4.0072e+06	544246	756745	2.01779e+06	5.21444e+07	3.49789e+07	7.53557e+07	82084.1	168727	479971	1.253e+06	156190	2.87172e+07	3.64117e+06	329676	930214	216576	2.59103e+07	2.28874e+07	4.45094e+06	471224	281287	1.28472e+08	833775	911611	2.96411e+06	1.78133e+07	1.61453e+06	1.75013e+08	1.88128e+06	4.25718e+06	4.01609e+07	130757	5.68947e+07	7.13612e+07	1.76833e+06	4.82328e+06	9.88909e+07	1.39268e+08	1.12278e+08
148 M	Positive	1.63516e+06	331956	4.59437e+06	2.11137e+06	2.63347e+06	680629	2.37593e+06	1.3379e+07	4.2003e+06	57458.8	663586	1.13641e+06	5.47417e+07	8.58297e+06	8.57893e+07	33336.2	166395	374527	352406	41988.5	1.14386e+07	906531	79994	562319	80912.6	1.01911e+07	2.69623e+07	5.88493e+06	757076	495420	6.91421e+07	435619	1.09944e+06	4.63689e+06	1.63408e+07	929904	3.41908e+08	2.43054e+06	4.26002e+06	2.83922e+07	29254.2	5.41289e+07	6.02567e+07	1.56701e+06	5.43866e+06	2.80858e+07	8.13977e+07	181791545
151 M	Positive	1.36491e+06	952187	6.84457e+06	7.60216e+06	439381	466282	1.71521e+06	1.24016e+07	4.54889e+06	199665	520977	2.67872e+06	4.38826e+07	3.95367e+07	5.27863e+07	23698.9	280574	272985	500972	92583.2	9.62685e+06	3.38356e+06	320291	2.18363e+06	144912	2.19413e+07	1.85494e+07	6.36636e+06	599568	477496	1.08117e+08	568708	663841	7.20417e+06	1.44155e+07	892848	1.50508e+08	1.66422e+06	4.5852e+06	3.1587e+07	183534	4.84405e+07	8.70232e+07	990552	3.69809e+06	1.05149e+08	1.54755e+08	1.51575e+08
159 M	Positive	2.05322e+06	96247.1	6.51437e+06	2.39445e+06	2.70433e+06	520026	1.4968e+06	1.48572e+07	4.48978e+06	311221	980923	2.44075e+06	5.51518e+07	30614856	8.35155e+07	105988	186980	310830	705100	85481.2	5.26756e+07	1.11339e+06	120022	1.32329e+06	47786.5	2.2736e+07	3.00521e+07	7405907	672731	523273	1.17057e+08	1.12174e+06	541867	6.29831e+06	1.75585e+07	1.54233e+06	1.59245e+08	1.79768e+06	4.27719e+06	4.16452e+07	80856.6	5.72903e+07	1.02312e+08	1.55834e+06	4.78561e+06	3.26408e+07	1.71083e+08	1.10866e+08
162 M	Positive	1.15612e+06	250970	6.01259e+06	6.28867e+06	9.51562e+06	778121	2.07528e+06	1.19244e+07	4.84328e+06	112594	423638	1.69367e+06	3.05493e+07	7.67626e+06	1.0414e+08	53762.3	250998	355783	352325	25987.9	8.74702e+06	2.77533e+06	266847	1.11952e+06	92375.4	1.19244e+07	2.45303e+07	9.56122e+06	532974	321751	6.67769e+07	420362	804677	2.6709e+06	1.43093e+07	1.38624e+06	2.56496e+08	3.06367e+06	3.77854e+06	3.36156e+07	34505.2	7.06381e+07	7.62029e+07	836652	5.00587e+06	7.69978e+07	1.53314e+08	1.35144e+08
164 M	Positive	1.05183e+06	111746	7.06487e+06	6.31463e+06	606946	834952	2.19076e+06	1.39399e+07	5.00954e+06	405138	923901	1.77214e+06	5.92446e+07	4.58855e+07	8.46849e+07	51129.3	207680	464580	309181	72641.7	1.13989e+07	2.21553e+06	273782	1.17877e+06	179008	1.62632e+07	2.19553e+07	5.70235e+06	371605	275266	8.46849e+07	839956	957613	3.33381e+06	1.76572e+07	1.44709e+06	1.78366e+08	2.8645e+06	3.44175e+06	2.77636e+07	139048	7.52755e+07	7.37653e+07	1.03602e+06	4.03973e+06	8.52657e+07	1.28944e+08	1.21974e+08
167 M	Positive	1.83152e+06	226991	7.8287e+06	3.00669e+06	2.06717e+06	736962	3.015e+06	1.2823e+07	4.68493e+06	456172	651446	2.27232e+06	4.04045e+07	3.04848e+07	8.17767e+07	31741	73671.9	325976	430732	105239	7.55062e+06	1.32999e+06	123520	1.0363e+06	184253	1.50005e+07	1.82667e+07	7.00594e+06	443617	307017	7.51233e+07	597069	707200	4.3175e+06	1.65731e+07	1.24772e+06	2.63445e+08	2.58997e+06	3.58281e+06	2.5404e+07	53289.7	7.75427e+07	8.52849e+07	1.34027e+06	3.14209e+06	4.18561e+07	1.13229e+08	1.07665e+08
170 M	Positive	570941	50773.4	2.5555e+06	2.06462e+06	2.47918e+06	1.20899e+06	1.23663e+06	1.13636e+07	2.19973e+06	105373	851591	1.14452e+06	6.70936e+07	2.30294e+07	4.61798e+08	67752.3	1.27115e+06	242948	183788	25914.2	1.93423e+07	4.308e+06	106884	572608	32282.5	1.7907e+06	1.51716e+07	2.24111e+06	246147	143225	1.7529e+07	950670	863789	1.4347e+06	8.03915e+06	719827	1.29397e+08	4.07961e+06	2.20397e+06	1.66827e+07	153435	6.64892e+07	7.19292e+07	525264	2.80275e+06	2.76837e+07	1.13636e+08	7.67648e+07
146 M	Positive	1.15793e+06	58685.7	5.39628e+06	5.47854e+06	2.07256e+06	478236	2.02772e+06	9.09023e+06	3.42297e+06	157000	662304	1.78338e+06	4.38396e+07	1.37836e+07	5.93461e+07	24271.5	183248	507333	288688	49822.1	1.78038e+07	2.48194e+06	271040	962567	126835	1.92396e+07	1.90482e+07	8.40346e+06	596283	323866	1.0912e+08	422699	916486	3.37108e+06	1.10078e+07	1.438e+06	2.76539e+08	1.72628e+06	4.29588e+06	39915064	143538	5.54216e+07	6.22177e+07	1.03506e+06	4.5362e+06	7.65757e+07	1.20607e+08	1.57937e+08
152 M	Positive	1.95594e+06	347583	3.60655e+06	3.34943e+06	4.76723e+06	1.54312e+06	1.13806e+06	1.14403e+07	3.0932e+06	167972	881777	5.00955e+06	5.81134e+07	3.63934e+07	1.97304e+08	50750.1	1.24722e+06	217916	390042	121089	9.78228e+06	5.93239e+06	141092	1.05723e+06	175247	3.85843e+06	9.78228e+06	4.16506e+06	394507	199560	2.55334e+07	1.29383e+06	989270	2.38443e+06	1.31812e+07	1.0816e+06	236267285	5.4656e+06	2.75457e+06	1.9233e+07	521042	1.01139e+08	8.78747e+07	555641	2.27085e+06	4.25281e+07	1.8404e+08	1.06113e+08
154 M	Positive	486508	89713.3	5.01042e+06	6.71405e+06	1.92415e+06	690561	1.87371e+06	6.16675e+06	3.53217e+06	482390	933515	868974	5.38578e+07	1.29024e+07	72820426	21464.8	56574.6	129745	255607	419829	37045559	2.97631e+06	240212	819837	911135	1.30002e+07	1.1534e+07	4.3023e+06	436044	486383	7.46776e+07	524898	501129	4.5479e+06	5.95853e+06	1.2484e+06	3.2625e+08	2.48007e+06	3.17857e+06	3.00079e+07	63235.1	7.17452e+07	3.89027e+07	815724	2.29704e+06	8.57228e+07	1.1925e+08	1.42708e+08
157 M	Positive	374279	1.49377e+06	4.36846e+06	4.98797e+06	606427	445375	1.2001e+06	6.86864e+06	2.5613e+06	348798	563206	1.34313e+06	6.30666e+07	139245968	7.18085e+07	16250.1	108806	192172	180349	51435.3	6.18802e+07	2.30156e+06	216841	545769	60435.3	1.82955e+07	1.46739e+07	2.4374e+06	430290	455475	9.67853e+07	340052	1.03216e+06	4.81893e+06	5.79027e+06	749015	1.87236e+08	1.56632e+06	4.04555e+06	2.966e+07	102813	4.05249e+07	7.18085e+07	848540	3.21887e+06	6.74375e+07	1.17391e+08	1.20513e+08
160 M	Positive	479401	10975.4	3.39767e+06	3.29475e+06	331642	1.12411e+06	1.16818e+06	6.39575e+06	2.40462e+06	138230	346566	587928	3.93059e+07	1.49648e+07	6.07286e+08	28762.7	959922	118417	277459	37849.6	1.80075e+07	1.59224e+06	133909	535766	125006	6.27156e+06	9.87305e+06	2.99136e+06	250512	158382	5.43949e+07	605088	1.58895e+06	883670	5.31777e+06	805176	9.71535e+07	3.62218e+06	1.52005e+06	1.53374e+07	24709.5	6.39575e+07	2.66386e+07	220324	1.26635e+06	4.20381e+07	6.17842e+07	68304153
162 A-M	Positive	1.31408e+06	142787	8.91735e+06	7.26927e+06	3.44259e+06	1.00566e+06	1.84777e+06	1.34531e+07	5.23311e+06	259012	767066	1.37364e+06	4.1358e+07	1.20124e+07	1.66243e+08	31882.8	271547	429033	316465	60574.9	2.23009e+07	3.30432e+06	317829	1.18052e+06	145976	8.50394e+06	2.10845e+07	8.37673e+06	395960	445324	4.73049e+07	677437	663828	7.94356e+06	1.43266e+07	1.49662e+06	1.88611e+08	3.24481e+06	2.88868e+06	2.56798e+07	53369.4	8.81223e+07	5.90636e+07	820545	3.65243e+06	9.50153e+07	1.27183e+08	1.20425e+08
165 M	Positive	1.21426e+06	61600.9	3.04719e+06	2.04829e+06	8.42976e+06	953364	1.02434e+06	1.24147e+07	1.46166e+06	167503	636852	1.02194e+06	2.14576e+07	8.83847e+07	1.4305e+08	28063.4	229987	334531	549766	62305.2	2.10999e+07	1.1391e+06	79634	513546	84473	2.25304e+07	2.78948e+07	4.30073e+06	687979	721742	1.85455e+08	527350	687736	1.30274e+06	9.96244e+06	1.36387e+06	2.05684e+08	3.40471e+06	3.73623e+06	3.35658e+07	81514.3	1.38963e+08	4.88415e+07	751346	4.21729e+06	2.84568e+07	9.60481e+07	7.10143e+07
168 M	Positive	965989	205681	4.93746e+06	4.67953e+06	414945	873548	2.24466e+06	6.8393e+06	2.93796e+06	85389.2	444728	589486	1.92078e+07	1.4228e+08	155619104	40598.6	110432	640985	382534	82926	1.60955e+07	2.19466e+06	216969	968529	172852	3.07681e+07	2.69443e+07	8.05835e+06	351286	247775	1.13824e+08	474925	1.20974e+06	996150	6.622e+06	1.34e+06	1.12498e+08	3.05056e+06	4.46511e+06	5.10431e+07	241882	7.3719e+07	3.11238e+07	393861	2.42544e+06	5.85128e+07	1.27163e+08	8.24337e+07
171 M	Positive	1.00796e+06	110715	4.82433e+06	7.03804e+06	922003	407754	1.81613e+06	1.01152e+07	5.16211e+06	292546	594425	1.77799e+06	3.89305e+07	3.578e+07	7.81985e+07	47769.3	87984.3	316219	391164	18350.2	9.84667e+06	2.48318e+06	276631	926924	99923.5	1.92402e+07	2.08154e+07	9.70248e+06	446909	255542	1.10153e+08	547687	802837	4.41665e+06	1.15891e+07	1.39734e+06	2.25061e+08	1.47117e+06	3.75912e+06	2.94791e+07	119942	5.98584e+07	6.49216e+07	1.32935e+06	4.69337e+06	8.47244e+07	1.33894e+08	1.55272e+08
172 M	Positive	711676	93668.6	5.59367e+06	3.01797e+06	3.07312e+06	896729	2.61062e+06	1.25026e+07	5.95604e+06	349472	624493	986150	5.05563e+07	2.11601e+07	8.22331e+07	38987.5	122253	214706	484836	95485.2	3.75054e+07	1.34198e+06	134823	677877	91878.9	1.68521e+07	2.74955e+07	1.1086e+07	703156	640942	1.05294e+08	630893	1.29096e+06	5.97961e+06	1.62186e+07	1.53548e+06	2.61903e+08	2.81783e+06	3.8179e+06	2.80023e+07	70914.2	4.58681e+07	5.15699e+07	1.36265e+06	4.25645e+06	4.94159e+07	1.2392e+08	123032943
178 M	Positive	167850	75950	6.05808e+06	2.89743e+06	1.7932e+06	1.17871e+06	3.80641e+06	1.57705e+07	4.07443e+06	394666	697160	882894	6.73733e+07	1.13719e+07	1.41613e+08	30069.1	174650	62452.6	216237	41782.6	5.25159e+06	1.48151e+06	151301	371400	73061	1.19083e+07	1.52341e+07	5.69216e+06	301535	433012	7.42394e+07	707969	930694	6.10612e+06	8.29248e+06	862565	2.02905e+08	4.36082e+06	2.78528e+06	1.6736e+07	20754.5	8.11055e+07	4.03382e+07	659733	1.59637e+06	4.37712e+07	8.19637e+07	1.39467e+08
180 A-M	Positive	2.79725e+06	426411	7.04893e+06	5.12857e+06	5.11566e+06	669930	1.88743e+06	1.50768e+07	4.63887e+06	247195	733119	1.31396e+06	4.22389e+07	3.93671e+07	7.96915e+07	23839.5	288514	227812	313577	43106.8	7.42421e+06	2.90176e+06	225935	694686	50628.5	1.68716e+07	1.32819e+07	6.75157e+06	558446	371763	1.03264e+08	924952	1.02586e+06	3.62099e+06	1.87861e+07	1.33506e+06	2.69989e+08	2.44227e+06	3.19972e+06	2.10596e+07	62691.3	6.79651e+07	6.32985e+07	1.44406e+06	3.15488e+06	6.85634e+07	9.26144e+07	1.59144e+08
183 M	Positive	863507	0	5.83692e+06	5.37588e+06	3.43077e+06	668056	2.31385e+06	2.08355e+07	3.06165e+06	936735	1.17417e+06	2.46897e+06	8.93207e+07	6.20534e+07	8.90489e+07	26790.2	169595	151977	249716	114591	1.18671e+07	2.54939e+06	243140	722044	26517.5	1.60342e+07	1.73025e+07	2.32427e+06	386953	1.03122e+06	9.96478e+07	812160	1.3416e+06	7.8547e+06	1.03271e+07	1.6428e+06	1.75881e+08	2.38177e+06	3.25274e+06	2.17413e+07	76835.7	9.33066e+07	7.09311e+07	900764	2.15781e+06	7.0297e+07	1.00554e+08	9.87419e+07
186 M	Positive	299035	5206.95	2.46236e+06	2.62023e+06	286962	1.04546e+06	681428	3.79309e+06	1.03196e+06	93803.1	269452	982575	4.13298e+07	9.81583e+06	6.59688e+08	12292.6	251770	145818	173395	6756.6	6.59688e+06	1.2874e+06	111721	622149	17302	7.43142e+06	6.08025e+06	2.30642e+06	94987.1	104537	7.5109e+07	684041	1.48094e+06	802545	3.09667e+06	696147	6.08194e+07	3.55001e+06	1.46569e+06	2.55132e+07	94298.2	8.02752e+07	2.64272e+07	229362	966724	3.18319e+07	4.96753e+07	7.74934e+07
188 M	Positive	348796	6091.06	3.29071e+06	1.6305e+06	853484	439310	1.65575e+06	6.2893e+06	1.82431e+06	282915	384173	1.28242e+06	6.19782e+07	2.55204e+08	2.47103e+08	30812.8	1.46506e+07	331510	78070.2	62966	2.25498e+07	823318	69302.1	344148	79988.9	1.84314e+07	6.74274e+06	3.20598e+06	171664	110115	1.16125e+08	1.19385e+06	1.75956e+06	1.55693e+06	5.08961e+06	726125	8.12623e+07	1.41337e+06	2.0932e+06	1.64735e+07	51084.5	2.88962e+07	5.44841e+07	275078	1.32361e+06	2.38326e+07	6.67042e+07	7.62912e+07
188 C-M	Positive	368519	20999.6	4.76939e+06	2.76242e+06	2.96077e+06	480714	1.38261e+06	5.40697e+06	3.04038e+06	90859	314367	952411	1.22997e+08	2.19959e+08	118508515	25581.7	1.92127e+07	85408.4	74940.9	21653	1.40953e+07	3.56036e+06	101866	442121	31771.4	1.20304e+07	7.34529e+06	5.22274e+06	235558	236676	7.81977e+07	778440	3.14187e+06	2.24172e+06	6.8921e+06	820046	2.21827e+08	1.82187e+06	1.64257e+06	1.37362e+07	46505.3	3.90539e+07	4.70443e+07	491618	1.90095e+06	3.46548e+07	6.85015e+07	1.0145e+08
188 F-M	Positive	631472	207209	5.67342e+06	2.68084e+06	5.65413e+06	500406	1.097e+06	1.02248e+07	4.46122e+06	406345	419939	1.30288e+06	9.35511e+07	1.66581e+08	1.04657e+08	36828.3	1.67789e+07	52222.4	171538	108345	1.31575e+07	5.40098e+06	102492	556698	121534	1.02472e+07	8.13731e+06	1.02745e+07	419223	370251	7.30303e+07	856127	790400	7.83854e+06	1.26747e+07	1.02712e+06	2.59026e+08	1.65489e+06	2.79949e+06	1.83481e+07	26029.8	3.95933e+07	6.40976e+07	859037	3.38923e+06	3.48855e+07	7.74966e+07	1.18418e+08
188 I-M	Positive	379571	476913	5.53215e+06	5.17441e+06	577533	663156	754801	1.06083e+07	3.95696e+06	563358	514116	1.73108e+06	7.5365e+07	1.71578e+08	8.67112e+07	35712.7	1.14385e+07	59077.8	93645.9	84798	2.12166e+07	5.59206e+06	202095	750451	89609.4	1.38369e+07	6.94964e+06	4.7484e+06	294258	470233	7.78556e+07	650425	688051	5.5733e+06	1.24532e+07	858804	2.43008e+08	2.21844e+06	2.96559e+06	1.60508e+07	62252.6	4.16952e+07	6.74318e+07	596618	2.65248e+06	6.73396e+07	9.77807e+07	1.28222e+08
173 M	Positive	1.11888e+06	19908.9	4.47638e+06	3.26999e+06	1.55607e+06	577823	2.68174e+06	8.12272e+06	3.25039e+06	170388	388583	1.65438e+06	5.23854e+07	5.10507e+07	8.24986e+07	21513.2	106831	444378	478757	136964	2.06038e+07	1.55765e+06	141645	1.01307e+06	301893	2.36068e+07	1.99365e+07	6.06312e+06	388876	225317	1.38471e+08	343546	888539	1.93791e+06	1.01768e+07	889067	1.97416e+08	2.03824e+06	3.06915e+06	3.94559e+07	125811	4.76307e+07	6.25622e+07	866793	4.07885e+06	4.85482e+07	1.35134e+08	8.84212e+07
179 M	Positive	497885	64188.1	2.92091e+06	5.44348e+06	1.12145e+06	657635	913745	6.72316e+06	2.22774e+06	492254	439312	3.57012e+06	6.36299e+07	1.57274e+07	7.14335e+07	12679.3	101212	224814	168013	73097	1.81285e+07	2.52926e+06	168511	1.04419e+06	175767	1.20657e+07	2.11299e+07	3.12926e+06	429149	232125	7.56355e+07	284147	523627	2.31861e+06	8.70408e+06	1.32297e+06	2.33846e+08	2.30118e+06	3.90723e+06	3.25353e+07	159340	8.04377e+07	1.16455e+08	670479	3.80249e+06	6.90324e+07	1.62676e+08	1.54272e+08
181 M	Positive	702997	353567	6.08385e+06	5.92552e+06	385629	898394	1.48178e+06	1.293e+07	3.56181e+06	472351	634180	1.56051e+06	6.02243e+07	1.05002e+07	9.19852e+07	11424	81934	324376	237553	62117.9	2.37773e+07	2.79559e+06	262151	872776	84003	1.56201e+07	1.98723e+07	3.23379e+06	319961	719947	9.71919e+07	302749	605221	5.21627e+06	1.0587e+07	1.34143e+06	226516407	3.26861e+06	3.70005e+06	3.23684e+07	177067	8.63446e+07	6.96832e+07	732219	3.24294e+06	7.55841e+07	1.2149e+08	1.35374e+08
184 M	Positive	1.71529e+06	269768	5.79014e+06	4.59647e+06	3.58118e+06	398028	2.49601e+06	1.63258e+07	3.83856e+06	625608	434527	1.60879e+06	3.00835e+07	1.4308e+07	8.21794e+07	53046.2	172714	515747	425954	125299	1.52252e+07	2.19198e+06	203238	836572	240576	2.47639e+07	2.49473e+07	7.79314e+06	551739	224657	1.14648e+08	712592	719835	2.20215e+06	1.94442e+07	1.49837e+06	2.40782e+08	1.26504e+06	3.33175e+06	4.83354e+07	111445	5.12704e+07	5.48474e+07	973582	3.25822e+06	6.08091e+07	1.39411e+08	1.15565e+08
186 A-M	Positive	176542	89041.3	1.95095e+06	1.81819e+06	2.18661e+06	1.15422e+06	850321	4.1567e+06	1.16019e+06	178180	332854	503359	4.18308e+07	1.84401e+08	3.76976e+08	23467.1	324554	76611.1	151324	37660.8	1.30806e+07	1.90274e+06	72996.9	230982	23568.7	1.07188e+07	9.22003e+06	4.09004e+06	400785	170951	1.14455e+08	1.18443e+06	1.23394e+06	599245	5.76819e+06	906607	1.65649e+08	4.18722e+06	1.93595e+06	1.8213e+07	89286.2	4.34204e+07	2.99764e+07	514242	2.13594e+06	2.34815e+07	4.63272e+07	8.81126e+07
188 A-M	Positive	418477	49081.4	2.63456e+06	1.3725e+06	3.44554e+06	429717	1.15784e+06	5.97896e+06	1.80071e+06	258613	393348	680877	5.29514e+07	3.1177e+08	210939432	20357.7	1.24337e+07	131934	46748.1	62314.9	8.28912e+06	5.3228e+06	58658.2	188914	80793	1.70731e+07	6.43334e+06	3.28153e+06	232957	142129	1.10109e+08	956949	9.217e+06	812690	6.37148e+06	619532	1.57994e+08	1.43505e+06	1.59978e+06	9.46444e+06	21472.8	3.5569e+07	4.14456e+07	339559	1.29319e+06	1.8001e+07	3.98372e+07	8.78399e+07
188 D-M	Positive	672461	87307.9	4.60204e+06	3.6053e+06	3.23538e+06	366608	1.13605e+06	7.08868e+06	3.99543e+06	84792.5	310141	843670	1.24993e+08	206989012	1.22993e+08	71140.5	2.28988e+07	76345.3	128869	30442.2	1.68991e+07	3.31136e+06	186787	812007	33976.6	1.14994e+07	7.22058e+06	5.7042e+06	275954	298446	7.04963e+07	714403	9.40357e+06	4.2064e+06	8.10963e+06	857259	1.66609e+08	1.30896e+06	2.30046e+06	1.74991e+07	56413.4	2.98984e+07	5.10973e+07	601445	2.34888e+06	4.88974e+07	72996125	1.24993e+08
188 G-M	Positive	651579	250605	4.79658e+06	4.45781e+06	2.43859e+06	596345	925185	1.02493e+07	3.19406e+06	147009	391615	1.78491e+06	7.94573e+07	1.8672e+08	1.13655e+08	30278.4	2.01941e+07	61573.8	145297	73560.2	1.25833e+07	5.40718e+06	157846	794798	77738.5	1.42069e+07	6.19474e+06	7.60952e+06	275115	282003	7.87469e+07	872411	806848	5.40886e+06	1.23803e+07	864551	2.12946e+08	2.05771e+06	2.26627e+06	1.62365e+07	40197.1	3.79528e+07	7.22523e+07	666134	2.77943e+06	5.70306e+07	8.10809e+07	1.1467e+08
188 J-M	Positive	1.25738e+06	3.93152e+06	3.92379e+06	3.38351e+06	3.9246e+06	1.05475e+06	964944	4.51947e+07	2.78336e+07	90615.2	1.18833e+06	882239	5.40066e+07	1.34255e+08	9.0983e+07	120798	7.50218e+06	44774.7	236721	0	1.29173e+07	1.05357e+07	232977	198943	0	0	1.43197e+07	1.26754e+07	2.17698e+06	1.83164e+06	9.0983e+07	3.29313e+06	3.75668e+06	3.28005e+07	5.54775e+07	2.60659e+06	1.67276e+08	3.66908e+06	7.48137e+06	8.57789e+06	402345	6.21348e+07	7.43398e+07	4.08757e+06	9.38924e+06	5.18416e+07	6.158e+07	9.65308e+07
177 M	Positive	943491	19421.8	8.27728e+06	4.48967e+06	776180	1.44635e+06	3.29679e+06	7.63545e+06	4.48009e+06	393807	322996	489946	9.83995e+07	9.50832e+06	198165635	22669.3	211763	441159	157007	47019.5	2.35749e+07	2.05686e+06	188398	840927	172588	1.15027e+07	1.86777e+07	4.97236e+06	299325	320894	6.84469e+07	249816	1.15732e+06	3.31219e+06	1.103e+07	1.2688e+06	1.49797e+08	5.04894e+06	2.30734e+06	1.97027e+07	98821.9	8.7694e+07	2.45999e+07	446782	1.74744e+06	6.17275e+07	7.78996e+07	1.2186e+08
180 M	Positive	1.27961e+06	48957.1	6.49112e+06	4.49188e+06	1.52105e+06	604576	2.59631e+06	1.14994e+07	4.19948e+06	668121	1.0546e+06	1.36241e+06	6.24253e+07	4.76403e+07	8.65534e+07	45231	240272	124973	393983	71103.9	3.38821e+07	2.1677e+06	196032	964435	99930.2	1.20128e+07	1.29368e+07	4.2859e+06	328653	375640	7.18712e+07	950186	693993	2.99776e+06	1.37582e+07	1.55598e+06	2.37769e+08	2.34333e+06	3.07537e+06	3.01859e+07	94829.3	7.15632e+07	5.45194e+07	1.22298e+06	2.82451e+06	6.32466e+07	1.31422e+08	1.21154e+08
182 M	Positive	913396	149066	7.29505e+06	6.51964e+06	2.04538e+06	738027	2.26817e+06	1.07928e+07	4.16103e+06	307560	563939	2.10553e+06	3.17512e+07	1.52755e+07	1.15657e+08	23951	52138.1	255375	334942	30466.7	4.07411e+06	2.92702e+06	246243	868003	61761.8	1.53846e+07	1.73486e+07	8.49076e+06	440484	372902	7.97598e+07	563448	639264	4.4302e+06	1.2875e+07	1.50964e+06	2.10099e+08	2.65073e+06	3.19115e+06	2.79323e+07	51702.9	9.4817e+07	7.46316e+07	1.14951e+06	3.21098e+06	7.8014e+07	1.42935e+08	1.20022e+08
187 M	Positive	519578	112104	7.29822e+06	5.16417e+06	880636	463319	2.8644e+06	8.78216e+06	4.44957e+06	701356	469351	1.70281e+06	5.211e+07	1.61123e+07	1.00651e+08	27120.4	96349.1	216750	530099	109086	3.51819e+07	2.31858e+06	211206	1.0263e+06	111194	2.51882e+07	1.7438e+07	4.85188e+06	393455	329429	115233561	412185	816033	3.30034e+06	1.04016e+07	1.2039e+06	1.65978e+08	1.52994e+06	4.49198e+06	3.45701e+07	168959	6.76105e+07	6.088e+07	805070	3.67854e+06	6.965e+07	1.40728e+08	1.12174e+08
188 B-M	Positive	307838	19628.1	2.73665e+06	2.33363e+06	1.78221e+06	415706	1.82609e+06	5.49425e+06	2.42786e+06	102230	230416	564270	7.54362e+07	2.56184e+08	2.06889e+08	26982.1	2.49462e+07	117632	69459.9	30789.8	1.55354e+07	4.43398e+06	99501.7	346779	27882.1	1.36681e+07	6.23281e+06	3.99353e+06	194838	136662	9.85899e+07	776916	6.8295e+06	1.66407e+06	4.82037e+06	631420	1.52247e+08	1.44852e+06	1.69799e+06	1.68798e+07	49648.3	2.47222e+07	3.22658e+07	366372	1.43234e+06	2.8606e+07	5.37763e+07	8.43989e+07
188 E-M	Positive	618639	68384.5	4.80989e+06	4.01954e+06	638480	465910	1.26853e+06	6.81016e+06	4.28453e+06	123705	254857	1.50717e+06	1.07136e+08	1.87651e+08	1.22192e+08	49966.1	2.20381e+07	106121	211690	68344.5	1.3092e+07	4.33569e+06	160448	681007	66622.9	1.13464e+07	7.06417e+06	7.41221e+06	288319	267315	6.58962e+07	609320	2.09735e+06	3.51483e+06	7.78807e+06	843851	2.0423e+08	1.50543e+06	2.52452e+06	2.20381e+07	68742.9	3.78576e+07	6.01139e+07	648609	1.96862e+06	5.29133e+07	8.46613e+07	1.01354e+08
188 H-M	Positive	270668	249477	4.09272e+06	3.9071e+06	2.85055e+06	569855	1.05348e+06	1.05007e+07	3.24788e+06	782941	462338	1.71231e+06	6.61954e+07	1.66775e+08	8.65791e+07	23626.3	2.14131e+07	20746.3	99228	153251	3.22226e+07	5.18478e+06	142054	424833	218401	1.35891e+07	7.71581e+06	5.89285e+06	326402	294848	7.57696e+07	773179	676921	5.91562e+06	1.21478e+07	927712	2.70709e+08	1.98035e+06	3.35663e+06	1.95601e+07	436141	4.31351e+07	6.32099e+07	730859	2.8171e+06	4.9312e+07	7.58725e+07	1.22508e+08
188 K-M	Positive	1.00408e+06	1.0004e+06	7.26885e+06	3.24814e+06	6.19422e+06	1.60949e+06	1.47752e+06	1.88181e+07	6.73371e+06	141451	592281	1.29662e+06	7.61947e+07	1.21395e+08	1.04422e+08	50408.6	1.45402e+07	73057.9	218872	19433.1	1.9925e+07	1.38085e+07	136442	578592	31253.1	1.21358e+07	8.11847e+06	1.03154e+07	568963	743419	7.67482e+07	1.31039e+06	842246	1.1754e+07	2.28769e+07	1.33479e+06	2.14049e+08	6.11629e+06	3.37659e+06	1.09859e+07	452936	8.08069e+07	6.49407e+07	1.33497e+06	4.0211e+06	4.24329e+07	8.52347e+07	1.16229e+08
188 M-M	Positive	575111	445781	8.47815e+06	6.09078e+06	3.08428e+06	1.68843e+06	684270	1.80144e+07	4.47285e+06	381907	680644	1.67613e+06	6.74607e+07	6.84545e+07	1.04856e+08	26070.3	8.24313e+06	110344	142443	101169	4.02528e+07	5.22481e+06	230644	1.00228e+06	100566	1.6275e+07	8.73662e+06	4.94457e+06	392985	990562	7.77723e+07	813455	1.24921e+06	8.27718e+06	1.39145e+07	1.12269e+06	2.44203e+08	5.71538e+06	3.98209e+06	1.34176e+07	136158	6.62183e+07	7.90147e+07	840873	3.95608e+06	7.36725e+07	100383435	1.34176e+08
188 Q-M	Positive	761357	226839	4.93855e+06	3.68995e+06	1.02673e+07	843536	1.26116e+06	1.09328e+07	3.46977e+06	182874	624153	1.51264e+06	5.96074e+07	2.22458e+08	7.65295e+07	28604.6	5.96956e+06	68203.7	154828	135782	1.81579e+07	3.71925e+06	158920	634569	80164.1	7.08074e+06	8.66313e+06	6.97742e+06	480622	426367	4.03087e+07	813025	610075	2.60284e+06	1.46404e+07	1.2718e+06	2.48371e+08	2.91771e+06	2.88822e+06	2.62387e+07	589924	5.32379e+07	6.65474e+07	539370	3.13371e+06	4.70585e+07	103623766	1.1218e+08
188 U-M	Positive	85238.7	24089.8	9.18224e+06	9.99058e+06	1.22806e+07	2.06115e+06	63244.3	6.08077e+06	6.37445e+06	284758	708501	401457	7.91155e+07	8.85622e+07	4.03844e+07	121770	8.68533e+06	49493.9	282035	183495	1.53508e+07	1.03619e+07	886614	28649.9	197646	6.70734e+06	6.79712e+06	3.90078e+06	132333	89539.5	6.62445e+07	363317	176248	1.53615e+06	7.50226e+06	1.67546e+06	2.60963e+08	6.60702e+06	5.32748e+06	4.19194e+07	369903	1.33434e+08	5.1248e+07	355295	2.44039e+06	1.19264e+08	1.1395e+08	101905550
190 M	Positive	89045.2	0	1.31469e+07	3.01774e+06	6.0651e+06	1.8044e+06	328825	2.41536e+07	2.7097e+06	261380	536955	1.54006e+06	5.36576e+07	5.05703e+06	2.73638e+08	43401	1.61093e+06	288859	104806	69075.6	4.57848e+07	2.79585e+06	178723	76294.7	174185	849970	5.01236e+06	994115	162282	367182	5.62564e+07	418229	436876	1.06801e+06	5.54138e+06	1.24638e+06	1.52106e+08	6.00014e+06	2.43385e+06	1.68158e+07	325469	1.04716e+08	4.00521e+07	315227	1.44241e+06	3.63068e+07	6.64987e+07	8.40788e+07
193 A-M	Positive	2.14008e+06	398561	5.41374e+06	4.66085e+06	1.31619e+06	913284	1.74088e+06	8.0278e+06	2.13488e+06	22969.1	451894	748543	4.32609e+07	1.37619e+08	1.25514e+08	12316.4	134543	149495	372089	31929.9	3.09007e+07	1.95936e+06	190244	878709	55385.2	1.80307e+07	1.77121e+07	6.09693e+06	524135	242108	1.09586e+08	191534	512288	2.86518e+06	1.05763e+07	1.70775e+06	1.59282e+08	3.1103e+06	5.88423e+06	3.56791e+07	950512	1.17231e+08	4.69563e+07	1.02412e+06	4.68866e+06	5.47292e+07	6.43499e+07	8.53751e+07
198 M	Positive	488035	89473	7.35672e+06	3.71897e+06	2.72229e+06	1.30894e+06	2.38746e+06	1.8064e+07	2.34824e+06	82002.9	577947	1.05885e+06	4.04255e+07	1.15814e+08	1.26739e+08	24785.4	425964	122330	193346	17395.2	1.87924e+07	1.54294e+06	114423	64566.1	34243.7	2.05405e+07	8.95917e+06	2.59344e+06	285683	150500	1.3985e+08	531687	469330	3.07696e+06	6.17786e+06	909933	152233054	4.79502e+06	2.89394e+06	1.85011e+07	675491	1.16542e+08	6.74487e+07	446503	2.26046e+06	3.47441e+07	5.41921e+07	4.58884e+07
201 M	Positive	90462.3	40687.8	1.46924e+07	4.4845e+06	8.20071e+06	2.27202e+06	545513	1.48738e+07	3.38653e+06	285933	558311	333582	5.40537e+07	1.16995e+07	4.87934e+07	11143.2	159725	134289	78457	48612.2	1.26972e+07	1.89244e+06	200127	32179.6	66100.8	5.9847e+06	8.55133e+06	3.00554e+06	147608	56152.3	7.29181e+07	413818	540739	1.92964e+06	6.68927e+06	1.35237e+06	2.55757e+08	7.17927e+06	4.0251e+06	2.02248e+07	954373	160528575	2.76617e+07	277572	900082	5.9586e+07	9.16011e+07	6.66602e+07
204 M	Positive	129583	0	1.30278e+07	7.30659e+06	8.55898e+06	1.71335e+06	621780	1.30278e+07	3.02813e+06	35578.7	824315	246653	2.40106e+07	6.53664e+07	2.96156e+07	14617.6	142410	114574	80897.7	61634.3	6.68982e+06	2.93349e+06	318874	16282	117072	9.08919e+06	5.59227e+06	4.48832e+06	152468	59278.2	9.31642e+07	182205	517256	1.05042e+06	4.89512e+06	978670	3.46904e+08	5.72924e+06	2.78527e+06	3.43874e+07	1.75466e+06	2.15868e+08	1.64363e+07	286755	933206	9.08919e+07	7.57432e+07	4.7794e+07
188 O-M	Positive	90970.7	0	1.9989e+07	6.73674e+06	1.98707e+07	5.49356e+06	55340.7	3.89135e+07	6.11514e+06	229172	811504	335525	1.06923e+08	3.21716e+07	4.05694e+07	41803.8	2.52816e+06	158903	79499.6	131777	4.82575e+07	6.03048e+06	289717	13017.2	107301	4.19724e+06	4.88388e+06	995078	324936	64486.4	6.31605e+07	525016	216759	3.46479e+06	7.62024e+06	1.30403e+06	2.80319e+08	1.72686e+07	3.24275e+06	1.91611e+07	788437	1.43117e+08	3.64297e+07	289656	1.22041e+06	8.18485e+07	1.19461e+08	6.64723e+07
188 R-M	Positive	171633	146170	8.04525e+06	7.45471e+06	5.42679e+06	1.87751e+06	477628	9.44556e+06	3.34954e+06	149232	567042	954829	9.74289e+07	2.11984e+08	8.47935e+07	19065	9.77761e+06	53364.4	216000	146823	2.8717e+07	5.35143e+06	338010	58484.3	111406	3.95337e+06	7.61082e+06	2.78912e+06	321921	294930	2.99701e+07	694394	258685	4.44491e+06	1.04352e+07	1.3483e+06	2.39134e+08	6.45718e+06	3.5124e+06	1.48284e+07	1.24624e+06	1.0547e+08	7.15314e+07	522680	3.14773e+06	8.6882e+07	5.12729e+07	5.26304e+07
188 V-M	Positive	88475.4	14164	1.04154e+07	1.32399e+07	4.53879e+06	2.18667e+06	171036	1.40343e+07	3.22148e+06	333466	967319	435707	8.61479e+07	4.81051e+07	2.14487e+07	32324.3	1.69886e+06	62502.4	285800	111782	2.31258e+07	5.38065e+06	621505	16397.3	88938.7	2.97063e+06	8.81775e+06	5.63702e+06	186978	190131	3.80428e+07	349317	110494	2.84628e+06	8.20886e+06	1.95158e+06	3.06284e+08	7.00425e+06	6.14967e+06	5.26067e+07	1.08849e+06	175649987	4.58985e+07	415257	2.7986e+06	1.63293e+08	9.00317e+07	4.52806e+07
194 M	Positive	272738	7053.95	1.13072e+07	6.96193e+06	1.57493e+07	1.14297e+06	1.82784e+06	1.15495e+07	3.49993e+06	946131	488942	286373	3.27909e+07	2.10799e+07	3.89291e+07	8587.16	198501	212517	279267	136438	1.0338e+07	3.00201e+06	311149	3444.99	253217	1.39725e+07	8.15735e+06	3.74012e+06	229044	40775.6	1.15495e+08	387265	563528	861873	9.85343e+06	1.30039e+06	2.43913e+08	4.02535e+06	5.12605e+06	3.24679e+07	986954	1.75262e+08	2.9641e+07	426969	2.91648e+06	8.80347e+07	1.01765e+08	6.85702e+07
196 M	Positive	115489	0	1.47004e+07	2.83265e+06	9.0658e+06	989462	420887	7.96742e+07	6.43053e+06	315117	401720	455864	3.8266e+07	1.1895e+07	2.65955e+07	18120.8	518936	61489.3	94260.8	186409	6.29061e+06	1.19425e+06	136331	5948.83	233455	8.79252e+06	1.12217e+07	3.0425e+06	2.01037e+06	74326.2	1.16706e+08	184888	447173	2.16682e+06	1.27928e+07	1.20393e+06	2.19946e+08	3.22756e+06	2.12126e+06	2.36778e+07	1.01757e+06	2.27801e+08	3.91638e+07	468321	1.19393e+06	3.62461e+07	8.93248e+07	7.66443e+07
202 M	Positive	140965	14339.2	1.01734e+07	3.61665e+06	5.29589e+06	1.68521e+06	337886	2.60264e+07	2.36572e+06	94480.3	1.02272e+06	524877	2.02844e+07	1.03606e+08	1.04855e+08	31887.1	365466	466497	195029	11707.5	1.74758e+07	1.55628e+06	147957	44494.3	34178.9	7.61444e+06	6.55342e+06	2.12472e+06	167615	415004	9.67409e+07	364757	1.00617e+06	1.22384e+06	6.24135e+06	1.06615e+06	1.94106e+08	5.76977e+06	5.13951e+06	3.80098e+07	543454	1.35437e+08	2.73995e+07	220744	1.39375e+06	3.98822e+07	1.1921e+08	8.11375e+07
188 P-M	Positive	125012	0	1.93664e+07	6.0905e+06	8.9529e+06	3.53633e+06	138575	1.25052e+07	5.34061e+06	146084	703595	400136	5.99806e+07	8.72043e+07	3.78476e+07	29722.8	4.98836e+06	135618	101848	84352.6	1.32798e+07	6.62996e+06	314823	19416.7	48280.5	3.39272e+06	5.0184e+06	5.46373e+06	343597	105084	8.5655e+07	473301	456861	951059	1.00793e+07	1.32227e+06	2.56744e+08	1.21732e+07	3.83364e+06	3.59662e+07	997480	1.59358e+08	4.36021e+07	289219	1.36459e+06	6.92765e+07	1.41652e+08	6.16406e+07
188 S-M	Positive	408166	438613	6.39794e+06	7.27628e+06	2.7906e+06	1.19599e+06	506054	9.99051e+06	2.11163e+06	170985	623570	1.43359e+06	7.6689e+07	2.00762e+08	6.07042e+07	13782.7	4.53172e+06	37862.8	311678	161353	1.39867e+07	5.68768e+06	321510	993051	173656	4.12724e+06	8.28042e+06	9.51477e+06	375142	525763	2.96861e+07	797781	187341	4.71067e+06	1.17983e+07	1.89188e+06	2.00762e+08	3.94279e+06	5.42813e+06	1.7412e+07	1.45106e+06	1.08468e+08	9.21981e+07	668531	4.63531e+06	9.51477e+07	3.29211e+07	1.68411e+08
189 M	Positive	88816.6	0	1.13165e+07	6.86871e+06	2.97194e+06	2.50882e+06	174241	1.01905e+07	2.06298e+06	216668	473935	228055	3.91854e+07	7.26282e+07	8.27623e+07	14332.7	303199	98955.4	319781	70516.4	8.27623e+06	2.97833e+06	240527	20359.6	117070	6.3057e+06	9.85266e+06	2.08227e+06	227156	124318	9.28965e+07	207243	552194	491299	6.4746e+06	2.9267e+06	1.87482e+08	8.55774e+06	3.27607e+06	2.75874e+07	466541	2.42094e+08	2.58984e+07	252650	1.60041e+06	7.37542e+07	1.14291e+08	6.4183e+07
192 A-M	Positive	344499	35243.4	6.90971e+06	6.92105e+06	4.98875e+06	811955	38732	1.42117e+07	4.2915e+06	58479.5	1.51434e+06	822621	7.16903e+07	1.0264e+08	2.04491e+07	15909.9	354710	316994	408721	97020.1	1.46065e+07	2.86283e+06	274864	36014.6	153232	1.49223e+07	1.208e+07	3.66238e+06	219522	139754	1.2001e+08	945279	323254	3.06414e+06	7.54173e+06	1.22267e+06	234493721	2.7431e+06	6.98249e+06	3.08711e+07	151318	1.08167e+08	8.68495e+07	647679	2.78728e+06	8.606e+07	1.40538e+08	7.15324e+07
200 M	Positive	3.52721e+06	712376	1.00568e+07	6.24862e+06	3.09301e+06	954980	1.25498e+06	1.80351e+07	4.85046e+06	61178.7	811929	935277	6.20853e+07	3.54317e+07	7.90031e+07	9728.17	22595.7	113424	340658	0	1.06851e+07	2.43701e+06	256083	663243	69881.7	1.4127e+07	2.68132e+07	1.03797e+07	914268	550264	1.15871e+08	851192	1.55917e+06	8.09516e+06	2.20251e+07	2.24754e+06	1.70774e+08	3.49431e+06	6.35132e+06	1.24345e+07	989089	1.33587e+08	7.2619e+07	1.53112e+06	5.25806e+06	7.70879e+07	3.55913e+07	1.94715e+08
203 M	Positive	21075	19379.7	5.52499e+06	2.2077e+06	4.75796e+06	1.07668e+06	128234	1.65213e+07	2.03865e+06	103820	195103	334586	8.3143e+07	8.15338e+07	3.49201e+08	62611.8	3.55852e+06	187453	225136	78680	1.33565e+07	3.57588e+06	97805.6	55084.7	68273.9	7.61697e+06	9.38711e+06	883963	813782	239446	1.18009e+08	230548	395988	1.97409e+06	3.06284e+06	589705	1.2391e+08	3.69308e+06	1.88746e+06	1.73259e+07	140995	100844396	3.47055e+07	232384	1.14732e+06	2.31191e+07	6.22231e+07	7.08056e+07
209 M	Positive	165450	0	8.97018e+06	8.84896e+06	4.20219e+06	1.03778e+06	1.14891e+06	1.49705e+07	1.58888e+06	109002	899015	833067	6.04275e+07	1.20006e+07	2.41831e+07	4995.08	129858	196268	918319	13825.9	1.38189e+07	3.47377e+06	429450	16374.5	0	1.00963e+06	6.4852e+06	4.52897e+06	242071	51579.4	1.59402e+07	1.44188e+06	261814	1.80732e+06	6.30337e+06	2.4979e+06	2.18194e+08	3.61572e+06	6.12154e+06	7.33373e+07	1.00457e+06	1.84858e+08	5.23664e+07	349143	2.44634e+06	1.04248e+08	140613601	129097832
210 M	Positive	95491.8	0	1.33195e+07	9.20096e+06	9.11333e+06	1.73119e+06	1.00202e+06	2.40101e+07	3.34444e+06	45887.6	670212	393671	4.38141e+07	7.41229e+06	32422430	2.26081e+07	573418	74780.6	267325	65909.4	1.31442e+07	3.02356e+06	329252	8984.67	184893	7.05564e+06	7.19814e+06	2.73977e+06	328807	82000.2	6.28294e+07	291487	283531	1.31478e+06	6.15368e+06	1.08398e+06	3.69791e+08	5.95593e+06	3.16973e+06	3.08451e+07	1.57757e+06	1.69122e+08	3.52265e+07	451062	1.61925e+06	8.66643e+07	6.55459e+07	9.46384e+07
213 M	Positive	262842	26952.7	5.94305e+06	5.73555e+06	3.85681e+06	1.84e+06	2.19991e+06	6.52921e+06	1.37932e+06	371953	479746	403358	3.65895e+07	2.36603e+08	1.18302e+08	10145.5	543999	134072	329787	22765.3	1.16362e+07	2.36126e+06	248342	24257.7	56972.1	1.9523e+07	1.11191e+07	4.38499e+06	214288	62389.6	1.17655e+08	250886	515116	945235	4.52582e+06	1.05509e+06	1.25413e+08	6.46357e+06	3.08442e+06	2.02987e+07	1.27304e+06	1.34463e+08	2.63108e+07	376805	2.38872e+06	6.18659e+07	6.17366e+07	1.99755e+07
217 M	Positive	14475.2	0	5.00879e+06	2.71437e+06	5.07361e+06	1.28791e+06	124501	3.28873e+06	2.98247e+06	270025	215151	368915	6.54737e+07	2.54834e+08	1.38008e+08	19441.6	405338	42923.9	218089	35874.9	4.64746e+06	1.0807e+06	126652	27619.9	68867.4	1.50204e+07	4.70508e+06	1.2166e+06	129753	89440.4	1.4892e+08	389445	719089	563162	4.02595e+06	742604	1.41218e+08	4.27462e+06	2.06284e+06	2.0284e+07	72416.4	1.39292e+08	2.97199e+07	191840	1.06793e+06	3.29936e+07	6.20716e+07	4.2943e+07
223 M	Positive	247875	0	1.00388e+07	9.18248e+06	7.46188e+06	1.33601e+06	2.23158e+06	1.24242e+07	3.56307e+06	84516.2	799987	2.57097e+06	7.35513e+07	1.64994e+07	8.07077e+07	65910	51800.8	110443	601514	24645.5	1.55054e+07	3.68366e+06	383149	35066	12841.2	12225422	1.02375e+07	3.22012e+06	240788	147106	8.97525e+07	1.08233e+06	688863	3.37882e+06	8.95675e+06	1.48369e+06	2.00775e+08	4.76034e+06	5.53182e+06	2.15684e+07	1.04119e+06	146108702	4.43296e+07	580857	2.86336e+06	1.11321e+08	7.2458e+07	6.80847e+07
226 M	Positive	238927	38779.1	1.37273e+07	1.51e+07	5.77869e+06	1.05742e+06	530568	9.43861e+06	3.69948e+06	19002.2	1.26645e+06	635958	4.28714e+07	2.51315e+07	2.61874e+07	19597	53453.2	170523	431207	0	1.02051e+07	6.16757e+06	675256	0	0	1.00996e+07	2.0063e+07	5.00371e+06	298263	113374	9.37679e+07	525690	356869	2.46692e+06	1.00512e+07	1.72277e+06	2.2914e+08	3.55271e+06	5.95348e+06	2.71378e+07	1.42677e+06	1.41497e+08	5.78658e+07	916668	4.36087e+06	1.71063e+08	1.26713e+08	5.21637e+07
228 M	Positive	858478	2.07809e+06	1.11849e+07	4.21087e+06	1.3815e+07	668426	444236	2.08999e+07	1.24487e+07	34295.9	795311	626764	7.65387e+07	1.91072e+07	1.06304e+08	22997.3	70670.8	160083	450109	36051.6	1.85056e+07	1.62748e+06	185725	22623.3	51927.7	1.08243e+07	2.95149e+07	1.27057e+07	913633	693971	9.3047e+07	1.55716e+06	3.01492e+06	1.33559e+07	2.41101e+07	2.70781e+06	159830728	2.19439e+06	5.93802e+06	1.54402e+07	524818	1.23062e+08	5.42774e+07	1.84763e+06	4.76803e+06	5.82794e+07	6.42825e+07	1.25313e+08
233A- M	Positive	619426	71940.6	1.15466e+07	3.34628e+06	1.73265e+07	1.55761e+06	798135	1.37716e+07	4.5536e+06	120555	368983	708112	2.8977e+07	1.76252e+08	9.84323e+07	17872.7	341808	49117.8	312287	49964.8	5.56965e+06	1.42023e+06	129591	973989	109610	1.56835e+07	1.21361e+07	6.00029e+06	1.58189e+06	316322	1.15311e+08	395060	618218	3.28279e+06	1.27963e+07	1.73886e+06	1.41002e+08	5.37734e+06	2.77439e+06	9.22292e+06	461846	2.25543e+08	4.21213e+07	522680	3.13808e+06	4.80959e+07	4.74985e+07	8.11059e+07
236 M	Positive	213483	0	2.27849e+07	4.96012e+06	1.09258e+07	952804	340459	1.33223e+07	5.18765e+06	31604.5	370180	1.41405e+06	5.93902e+07	1.90497e+07	3.68543e+07	0	114512	210132	454952	148540	1.33223e+07	1.90236e+06	208336	14562.9	319770	3.68393e+06	9.91857e+06	5.51404e+06	294591	41110.4	6.78568e+07	373453	527106	1.14711e+06	1.23031e+07	1.42946e+06	2.63957e+08	3.21887e+06	4.92436e+06	4.00915e+07	1.17487e+06	1.25753e+08	5.31648e+07	668246	2.28488e+06	6.08843e+07	117286381	1.14423e+08
215 M	Positive	436380	76891.5	9.06064e+06	6.25746e+06	1.08894e+07	1.50277e+06	1.62875e+06	9.06064e+06	2.60956e+06	542834	1.01211e+06	1.01981e+06	4.08976e+07	6.49207e+07	1.37988e+08	11819.1	338070	199829	620053	65593.1	2.90938e+07	2.63922e+06	297036	70684.2	49828.1	1.64588e+07	1.91188e+07	5.5271e+06	341500	187166	1.08894e+08	1.03121e+06	818153	4.83161e+06	1.02244e+07	1.21524e+06	1.49625e+08	5.15659e+06	5.79155e+06	1.87863e+07	840084	144637694	7.66414e+07	840948	5.06983e+06	8.20445e+07	6.26763e+07	4.74644e+07
218 M	Positive	173355	14915.7	1.3935e+07	7.65897e+06	7.31214e+06	1.20619e+06	1.02405e+06	9.78069e+06	3.83735e+06	646567	653555	454104	4.85025e+07	1.72837e+07	4.20211e+07	7907.14	62171.9	75323.5	194591	152174	1.31789e+07	3.15556e+06	365753	4177.52	284786	1.27468e+07	8.61194e+06	4.26734e+06	198555	100854	1.09104e+08	561524	412997	4.22338e+06	1.12344e+07	984633	3.00305e+08	4.08358e+06	4.48511e+06	1.90121e+07	1.47124e+06	1.76078e+08	4.99068e+07	458137	2.0192e+06	9.83013e+07	7.02152e+07	7.25917e+07
224 A- M	Positive	285312	0	1.44573e+07	8.51507e+06	1.96969e+07	1.46246e+06	133062	9.79992e+06	3.75163e+06	30339.8	459312	320851	3.33779e+07	3.26987e+07	3.59977e+07	5.32689e+07	282060	170232	407963	74559.9	8.48667e+06	1.74712e+06	201021	18019.2	136444	1.73116e+06	6.67596e+06	6.64618e+06	1.05635e+06	36050.4	1.0188e+08	510688	326126	401744	1.11583e+07	1.67507e+06	1.26138e+08	5.79997e+06	3.13717e+06	4.0267e+07	346172	3.3572e+08	3.80353e+07	376302	1.49711e+06	5.55976e+07	1.62038e+08	3.3572e+07
236A- M	Positive	508580	178189	1.15528e+07	6.38729e+06	1.62433e+07	665938	750130	1.40593e+07	6.25635e+06	71853.2	655548	1.64122e+06	9.21364e+07	4.42255e+07	9.25459e+07	10984.2	73272.5	177997	759160	44421.7	1.47418e+07	2.57763e+06	308664	7039	118127	1.00373e+07	2.66172e+07	6.23772e+06	521648	217006	7.34361e+07	512850	1.04361e+06	7.04544e+06	1.63798e+07	2.02609e+06	2.37507e+08	2.21594e+06	5.5487e+06	2.32047e+07	1.94777e+06	9.80058e+07	9.47298e+07	1.39618e+06	5.49849e+06	8.2991e+07	6.90681e+07	6.30622e+07
212 M	Positive	160719	0	1.80583e+07	3.21553e+06	8.48152e+06	1.59983e+06	295568	6.29386e+07	4.03299e+06	330177	193287	328793	4.93063e+07	3.96575e+07	3.54085e+07	18425.3	708056	101796	100065	148399	1.92976e+07	1.34217e+06	150678	12878.3	353021	3.89911e+06	4.49374e+06	3.19562e+06	250832	44631.2	8.61312e+07	139125	116172	654764	5.92102e+06	1.5659e+06	2.25729e+08	5.81549e+06	2.68305e+06	3.43463e+07	1.06209e+06	1.70846e+08	3.01858e+07	363357	1.23241e+06	3.84182e+07	8.49804e+07	1.15963e+08
216 M	Positive	177000	15623	5.07985e+06	3.61343e+06	4.93273e+06	1.65677e+06	607830	7.08858e+06	1.24542e+06	83327.1	601357	1.00626e+06	6.22411e+07	3.14087e+08	171739466	16160.5	84019.4	154148	174417	43410.2	1.00854e+07	3.77214e+06	149635	47342.7	35537.3	1.24482e+07	1.10075e+07	3.15015e+06	380478	56831.8	1.08922e+08	693903	1.24432e+06	1.06671e+06	9.79722e+06	1.42971e+06	1.27364e+08	5.44643e+06	3.74642e+06	1.83266e+07	951860	1.0604e+08	6.97331e+07	510351	3.65974e+06	4.4318e+07	4.42027e+07	2.06894e+07
225 M	Positive	594308	33000.7	7.59275e+06	8.69849e+06	3.59928e+06	968555	1.28329e+06	7.8139e+06	2.13176e+06	44997.9	719949	949988	3.75952e+07	3.4278e+07	1.56278e+08	5532.82	211088	87994	657310	0	1.86502e+07	3.6696e+06	401225	134289	65996.6	1.26792e+07	1.16471e+07	3.52996e+06	353793	238750	8.47735e+07	1.28824e+06	567365	4.62794e+06	8.69849e+06	1.34308e+06	1.62175e+08	3.34388e+06	3.37587e+06	1.78393e+07	742289	1.2974e+08	7.062e+07	532541	2.53255e+06	1.12786e+08	5.34441e+07	7.20943e+07
230 M	Positive	559838	13547	8.2499e+06	6.57764e+06	3.5974e+06	819562	1.03295e+06	1.14207e+07	2.84156e+06	105350	880751	1.93012e+06	3.3762e+07	5.1685e+07	8.66974e+07	20658.7	96177.4	312565	1.14089e+06	50208.3	8.58638e+06	2.07275e+06	208644	12876.3	113779	9.33665e+06	2.47588e+07	1.05871e+07	427013	155194	7.70273e+07	1.6907e+06	307430	4.10562e+06	1.37549e+07	2.41996e+06	2.35083e+08	2.9266e+06	6.09086e+06	2.67595e+07	1.37609e+06	1.33381e+08	1.28379e+08	909112	7.49221e+06	7.80277e+07	7.91114e+07	6.64402e+07
233 M	Positive	52627.2	79630.6	1.97056e+07	4.93918e+06	1.3271e+07	1.89201e+06	362635	2.46674e+07	5.72193e+06	587109	240859	211320	6.70556e+07	8.30752e+07	4.28135e+07	16719.6	572478	95597.4	112833	277736	3.68593e+07	2.12044e+06	221592	14654.5	520419	4.99312e+06	6.96998e+06	1.97585e+06	204996	114320	1.33686e+08	95351.9	151642	1.36314e+06	5.2018e+06	1.5053e+06	8.747e+07	6.41398e+06	3.42691e+06	1.8855e+07	353104	1.1639e+08	2.1265e+07	278163	925536	6.18102e+07	9.68266e+07	9.62595e+07
237 M	Positive	70519	13246.9	1.55221e+07	5.91077e+06	8.37699e+06	833315	209428	1.36331e+07	3.54644e+06	60010.3	769754	364288	4.54164e+07	2.78412e+07	1.47008e+07	20576.3	133717	22591.1	65404.2	253503	1.66719e+07	2.25849e+06	237096	2124.2	369198	7.7299e+06	4.27918e+06	2.90265e+06	208463	38402.6	1.16621e+08	347420	374657	1.03678e+06	6.43059e+06	1.06496e+06	3.77786e+08	3.06831e+06	2.23062e+06	3.72037e+07	1.6891e+06	1.89714e+08	5.12475e+07	447899	1.14542e+06	7.72818e+07	7.39146e+07	6.39772e+07
241 M	Positive	605330	240860	1.33969e+07	5.56745e+06	6.30207e+06	1.51417e+06	932747	1.31577e+07	5.24704e+06	1.34123e+06	479964	1.17291e+06	7.97836e+07	1.51912e+07	1.15907e+08	13139.3	120535	242154	323578	206473	1.54304e+07	2.17757e+06	231848	58377.5	357475	1.98562e+07	1.80619e+07	3.93319e+06	347392	236462	1.17941e+08	601084	537703	2.24233e+06	1.0513e+07	1.29391e+06	1.54304e+08	5.17881e+06	3.24473e+06	2.51193e+07	457581	1.866e+08	8.39701e+07	600897	2.33574e+06	6.41139e+07	6.94966e+07	5.29897e+07
247 M	Positive	400993	143063	7.47683e+06	9.53587e+06	7.59731e+06	1.99524e+06	814020	7.49087e+06	3.42953e+06	814308	785136	1.05954e+06	6.09967e+07	2.63881e+07	7.9904e+07	17047.1	90619.9	308276	399260	272291	4.52954e+07	3.88726e+06	455533	428650	665818	1.01113e+07	2.91008e+07	6.02216e+06	491505	413325	7.48895e+07	471565	796351	1.94828e+07	4.50354e+06	1.3038e+06	1.89895e+08	6.31572e+06	6.27652e+06	2.26066e+07	812288	1.80031e+08	6.53536e+07	731934	4.47279e+06	1.17554e+08	7.68624e+07	5.97636e+07
250 M	Positive	491174	0	9.69668e+06	4.98068e+06	3.45613e+06	1.63865e+06	2.13472e+06	9.74984e+06	3.04684e+06	0	357998	5.84273e+06	4.87952e+07	4.42511e+07	2.43435e+08	51917.4	225449	171901	516705	42821.6	9.33854e+06	2.65873e+06	151738	23363.8	54466	1.47143e+07	1.2875e+07	4.39847e+06	3.06903e+06	123947	9.4561e+07	477288	438448	1.21045e+06	7.64057e+06	1.04384e+06	8.40663e+07	5.81834e+06	3.18743e+06	1.76355e+07	1.30693e+06	244517120	3.18089e+07	303555	2.17721e+06	5.97228e+07	4.24118e+07	2.58582e+07
253 M	Positive	80830.1	91684.2	9.54924e+06	4.37718e+06	1.24007e+07	1.91474e+06	246173	7.86959e+06	5.16586e+06	35580.1	530723	4.13062e+06	7.22156e+07	1.06291e+07	1.4068e+08	15454.9	114043	68636.9	205525	90962.5	1.08376e+07	1.68348e+06	162046	19529.7	191236	1.1567e+07	1.53185e+07	4.55399e+06	342534	173760	9.35781e+07	787911	872371	6.91029e+06	1.06291e+07	1.39074e+06	1.83405e+08	6.7336e+06	3.76506e+06	2.05288e+07	787618	2.71981e+08	3.1158e+07	595163	2.79881e+06	5.127e+07	6.98189e+07	3.28253e+07
255A-M	Positive	301157	44267.4	7.56588e+06	4.5436e+06	5.43341e+06	3.24469e+06	668359	6.12362e+06	2.566e+06	102049	503365	651754	1.05977e+08	2.76264e+08	1.55795e+08	19530	564475	44247	240968	57788.2	1.35868e+07	1.85117e+06	197282	337875	100762	1.16846e+07	9.23901e+06	4.13156e+06	396589	169918	9.60132e+07	1.22463e+06	9.6919e+06	4.78813e+06	7.78796e+06	1.36515e+06	1.03259e+08	1.01448e+07	3.09836e+06	1.06883e+07	665685	1.13223e+08	4.7282e+07	568098	2.41482e+06	5.2445e+07	2.82605e+07	5.20826e+07
258 M	Positive	1.70769e+06	451482	8.96357e+06	5.20055e+06	2.74968e+06	1.19634e+06	2.53851e+06	1.40517e+07	3.05818e+06	17962.8	551108	1.03946e+06	4.32117e+07	1.43687e+07	1.22556e+08	9635.08	38010.5	106893	376078	27668.8	4.11381e+06	2.64244e+06	178659	1.08755e+06	30471.3	1.65874e+07	2.06021e+07	3.35514e+06	525481	625891	9.49811e+07	839777	912267	8.19438e+06	1.69043e+07	2.03029e+06	1.22556e+08	3.96607e+06	4.12643e+06	1.6693e+07	818299	1.40517e+08	7.33225e+07	850331	3.99274e+06	8.05068e+07	5.26147e+07	1.46856e+08
261 M	Positive	1.47593e+06	606668	7.29298e+06	1.98679e+06	2.6792e+06	1.0327e+06	776557	1.61907e+07	4.29951e+06	35264.4	558939	615651	9.1194e+07	9.16092e+07	2.83684e+08	30374.1	706098	113358	350906	61352.3	2.2418e+07	5.4547e+06	96359.5	297819	65735.9	5.48392e+06	1.93735e+07	7.16747e+06	925305	331179	6.03347e+07	1.96647e+06	1.66503e+06	6.94728e+06	1.95119e+07	1.43598e+06	1.60524e+08	3.99758e+06	4.32789e+06	1.29255e+07	571659	1.15964e+08	5.30005e+07	1.42217e+06	4.74149e+06	2.20028e+07	1.95119e+07	9.92202e+07
239 M	Positive	309263	0	2.26402e+07	1.34835e+07	6.29832e+06	547862	258588	1.48922e+07	4.51709e+06	552145	360710	391270	3.64256e+07	3.63249e+07	19017770	13419.7	170618	174626	366092	207332	1.34835e+07	5.60432e+06	562636	0	417470	7.12907e+06	1.01629e+07	8.62729e+06	185862	22448.1	1.05654e+08	456419	271873	629908	1.03642e+07	2.22216e+06	2.1634e+08	1.8539e+06	7.84362e+06	3.78343e+07	1.62571e+06	1.24773e+08	3.57212e+07	472712	2.624e+06	1.66028e+08	1.05654e+08	5.64496e+07
242 M	Positive	139735	20568.7	1.66452e+07	5.90584e+06	6.02914e+06	1.40204e+06	206826	7.83865e+06	3.49384e+06	149530	567787	509077	5.91253e+07	2.47945e+07	7.92382e+07	31372.9	103569	184950	226841	632429	2.2107e+07	2.45676e+06	231758	20376.3	1.40018e+06	6.05756e+06	1.25706e+07	1.5973e+06	208344	38954.3	1.12702e+08	390251	624301	2.03001e+06	1.12702e+07	1.4583e+06	2.31473e+08	4.64161e+06	4.92621e+06	2.52279e+07	437945	1.43045e+08	5.82583e+07	536194	1.23114e+06	6.4587e+07	8.92947e+07	7.24761e+07
245 M	Positive	118343	123973	8.58429e+06	4.09207e+06	5.79091e+06	2.57275e+06	157602	6.56236e+06	4.74978e+06	2.91378e+06	298977	1.58934e+06	8.55159e+07	2.38063e+07	208188332	40419.4	252474	110720	384944	445452	2.17524e+07	1.67657e+06	192570	33047.5	1.40751e+06	1.0176e+07	1.279e+07	2.09594e+06	283406	89270.6	9.25178e+07	250094	559201	1.67163e+06	8.24375e+06	964381	182981673	8.25124e+06	5.20135e+06	2.48332e+07	1.18769e+06	9.27978e+07	5.86288e+07	414797	2.19503e+06	4.95731e+07	9.80259e+07	6.42303e+07
251 M	Positive	391809	786077	7.12716e+06	6.27483e+06	2.78903e+06	858325	869263	1.00054e+07	2.34195e+06	34728	735150	405471	4.11868e+07	2.48765e+07	9.79985e+07	13006.8	180885	168142	151138	58975.7	1.30893e+07	2.48953e+06	251620	24079.5	139346	1.93256e+07	1.26781e+07	3.35717e+06	370302	106976	9.52573e+07	515668	518578	1.82812e+06	8.08659e+06	1.12824e+06	3.79658e+08	2.98912e+06	5.43315e+06	2.03535e+07	1.25012e+06	1.46655e+08	3.59099e+07	532457	3.21985e+06	7.12716e+07	5.969e+07	7.19569e+07
254 M	Positive	424659	199029	1.19904e+07	1.05557e+07	3.34015e+06	998089	695864	1.33227e+07	4.72969e+06	54896.7	539671	769564	4.86791e+07	1.67046e+07	138351107	15182.4	86242.7	132693	529097	0	5.74222e+06	4.5186e+06	495910	20362.9	91773.8	1.50649e+07	1.51674e+07	3.0794e+06	251542	155425	9.72557e+07	1.02657e+06	698737	4.44715e+06	1.32202e+07	1.46439e+06	2.04965e+08	3.24033e+06	2.56343e+06	1.90617e+07	1.17794e+06	1.85493e+08	7.17376e+07	496842	2.32566e+06	1.29128e+08	7.42997e+07	6.29241e+07
256 M	Positive	384753	21756.6	9.89276e+06	2.67925e+06	3.56529e+06	1.14793e+06	2.30575e+06	2.3426e+07	2.27246e+06	59311.7	385179	1.55574e+06	6.75873e+07	6.08531e+06	2.93617e+08	26675.7	753689	117183	109258	11534.4	1.17922e+07	1.22125e+06	103896	44863.8	83942	8.30992e+06	1.25836e+07	4.32521e+06	231265	61180	8.15163e+07	611378	444414	1.94947e+06	7.61133e+06	791254	1.8361e+08	3.34898e+06	4.44012e+06	1.23462e+07	876483	9.89276e+07	4.20244e+07	473751	1.52917e+06	3.40311e+07	2.90451e+07	7.76384e+07
259 M	Positive	448992	105279	1.07608e+07	10441863	2.05479e+06	1.34907e+06	825403	1.07608e+07	3.10833e+06	101503	845740	1.68478e+06	7.70302e+07	5.10339e+07	7.11704e+07	21273.8	80241.1	91494.9	343216	25218.6	1.7473e+07	4.64832e+06	483601	135974	0	1.57683e+07	1.38505e+07	5.63761e+06	461880	227826	1.09739e+08	836685	721394	4.48424e+06	1.32113e+07	1.431e+06	1.77926e+08	4.27278e+06	4.13657e+06	1.89646e+07	1.03472e+06	1.72599e+08	8.35293e+07	741175	3.36288e+06	1.22524e+08	7.94807e+07	5.57217e+07
262 M	Positive	121766	73702.7	8.83798e+06	7.59193e+06	8.08494e+06	2.18253e+06	122915	5.74951e+06	4.07151e+06	22159.2	662776	728372	4.15839e+07	9.59629e+07	7.27719e+07	2.07031e+07	123193	194044	536108	35788.7	2.34576e+07	2.33516e+06	283799	13326.2	124712	1.12845e+07	1.30616e+07	1.46646e+06	247913	75004.5	5.28684e+07	258914	433309	1.73381e+06	7.52453e+06	1.42098e+06	2.5057e+08	7.03034e+06	4.43962e+06	2.87e+07	208501	1.56384e+08	5.99768e+07	455308	2.03111e+06	6.94842e+07	1.13734e+08	6.99285e+07
265 M	Positive	70218.6	0	1.0344e+07	8.18943e+06	6.02318e+06	713312	81358.9	7.92491e+06	4.21722e+06	29935.3	575396	631665	7.49502e+07	6.51321e+07	6.02231e+07	30545.2	228148	66781	485251	54457	7.67751e+06	3.03901e+06	319394	29029.5	145836	8.5518e+06	8.65492e+06	4.15397e+06	325331	77920.5	7.8369e+07	651078	293598	1.14686e+06	9.9057e+06	1.94413e+06	1.70062e+08	2.5032e+06	7.39335e+06	5.1983e+07	872986	1.67433e+08	7.67911e+07	884953	4.523e+06	9.73037e+07	1.42887e+08	9.81804e+07
243 M	Positive	36124.8	14109.1	3.94735e+06	5.75917e+06	2.58529e+06	2.07074e+06	89533.8	4.40151e+06	2.40701e+06	532541	818995	311311	2.90706e+07	1.57612e+07	8.23083e+07	11165.5	255786	159449	238334	136117	1.20252e+07	2.06307e+06	255402	62308.5	409447	1.20252e+07	13309423	3.53549e+06	325265	31699.5	8.34758e+07	239035	369126	639269	5.69896e+06	1.36037e+06	318725656	6.71309e+06	7.76383e+06	5.95422e+07	52246.5	1.63449e+08	2.78447e+07	501840	2.37978e+06	6.59634e+07	1.49439e+08	8.93132e+07
246 M	Positive	358674	0	1.3408e+07	4.7185e+06	5.81274e+06	2.36276e+06	1.12536e+06	6.42963e+06	3.47495e+06	478752	695851	1.79761e+06	8.13554e+07	4.27443e+07	1.33072e+08	16545.3	129454	99138.9	298236	87294.3	1.38113e+07	1.88181e+06	157412	24503.9	180581	1.07869e+07	1.31056e+07	3.15367e+06	264212	43718.3	7.89359e+07	547529	932243	2.28042e+06	1.05853e+07	1.09088e+06	2.6312e+08	8.17412e+06	3.60977e+06	2.06665e+07	1.71462e+06	1.60291e+08	2.72193e+07	494025	1.70185e+06	5.18174e+07	5.96808e+07	6.28059e+07
249 M	Positive	2.15734e+06	266876	1.12589e+07	4.71858e+06	6.31624e+06	1.52187e+06	1.38145e+06	1.71851e+07	4.42268e+06	98748.5	808325	1.59994e+06	5.50189e+07	7.73995e+07	7.47351e+07	25948.3	80178	130940	308524	13547	1.75215e+06	1.96562e+06	167088	327665	46077.3	1.46539e+07	1.91833e+07	1.18014e+07	570827	245009	1.04309e+08	1.18074e+06	1.0252e+06	4.8887e+06	2.19809e+07	1.77148e+06	214480478	5.25492e+06	4.97011e+06	1.15862e+07	1.18754e+06	1.3455e+08	9.23199e+07	1.22738e+06	4.03617e+06	5.74168e+07	4.46279e+07	7.58009e+07
252 M	Positive	264308	0	1.17784e+07	8.16498e+06	5.03413e+06	2.17882e+06	949866	1.75756e+07	3.33955e+06	2197.56	710991	387313	5.76958e+07	3.45991e+07	2.85259e+07	8307.34	208634	71034	131704	0	1.90479e+07	3.14228e+06	367101	13435.1	0	4.68521e+06	7.87198e+06	2.02736e+06	188789	86815.3	5.89841e+07	249713	406850	998882	8.29921e+06	1.54177e+06	2.53052e+08	7.29808e+06	3.43921e+06	2.4293e+07	1.31729e+06	1.59193e+08	3.59794e+07	429442	1.73317e+06	1.05822e+08	9.66198e+07	7.65597e+07
255 M	Positive	7380.12	615641	8.36039e+06	4.17003e+06	8.12378e+06	1.60685e+06	1.10195e+06	5.24949e+06	2.95529e+06	844978	598462	1.99537e+06	9.22798e+07	121462269	1.04899e+08	38244.9	113096	28922.3	128318	318526	5.21341e+07	1.78946e+06	179995	15109.8	1.94061e+06	1.32504e+07	1.23828e+07	3.5913e+06	255421	352160	8.51813e+07	394384	645465	1.18307e+07	2.29389e+06	1.02735e+06	2.06644e+08	5.34077e+06	2.44361e+06	1.93235e+07	899583	1.66419e+08	5.0399e+07	742045	2.01705e+06	5.00046e+07	4.44836e+07	4.7323e+07
257 M	Positive	4.10578e+06	606672	1.01542e+07	6.2454e+06	7.57096e+06	484489	1.37898e+06	2.15095e+07	5.83079e+06	35795.5	1.30372e+06	1.68352e+06	5.22139e+07	6.27224e+07	6.14088e+07	32808.3	22945.3	245935	744677	41252.2	1.13585e+07	1.83935e+06	253007	828094	93158.1	1.20207e+07	2.97192e+07	7.03154e+06	688634	459837	104427812	1.791e+06	840045	7.23056e+06	2.54502e+07	2.53074e+06	1.61568e+08	1.44682e+06	4.21148e+06	1.06639e+07	752103	8.85009e+07	1.30863e+08	2.24998e+06	8.2736e+06	7.58579e+07	5.0572e+07	1.36446e+08
260 M	Positive	311189	61776.6	1.26335e+07	5.29295e+06	5.47695e+06	1.28814e+06	302701	1.24831e+07	2.99814e+06	0	731407	198588	2.24095e+07	3.88782e+07	4.53454e+07	23657.1	171388	132724	183101	51991	1.60175e+07	2.00616e+06	235313	19535.3	189540	8.34717e+06	9.24956e+06	3.16915e+06	347950	51766.1	9.17436e+07	221885	313932	380756	7.89597e+06	1.3047e+06	3.64719e+08	4.03515e+06	4.27528e+06	3.51935e+07	1.39606e+06	1.70703e+08	1.79727e+07	424862	1.84474e+06	6.17389e+07	8.72316e+07	6.28669e+07
263 M	Positive	473902	15270.7	8.27082e+06	9.81283e+06	3.11426e+06	1.84673e+06	1.73064e+06	6.66178e+06	2.40629e+06	17171.5	337372	535983	4.17045e+07	2.08172e+07	1.17053e+08	12248.2	182001	171838	345338	7445.44	3.49117e+06	4.11577e+06	338805	40398.6	81189.6	1.19156e+07	1.16352e+07	4.71696e+06	230835	119638	6.883e+07	434111	457883	3.12418e+06	9.04183e+06	1.43036e+06	2.24994e+08	5.77689e+06	3.27409e+06	2.50227e+07	809547	2.05369e+08	4.18447e+07	413057	2.45023e+06	124763179	6.90403e+07	5.2779e+07
267 M	Positive	93908.6	0	8.5677e+06	7.50051e+06	4.36582e+06	766619	77089.3	7.21138e+06	4.39646e+06	0	532917	622176	7.03594e+07	1.20257e+07	61385017	21149.1	200543	104394	222796	0	1.98733e+06	2.76905e+06	338000	33559.9	64134	1.66924e+07	8.30953e+06	2.14838e+06	243313	55350.7	1.1577e+08	295309	311071	889561	9.06416e+06	1.57844e+06	3.02438e+08	2.57217e+06	3.3801e+06	2.84489e+07	37705.2	1.83078e+08	5.39363e+07	326440	1.78636e+06	9.24365e+07	9.87186e+07	9.24365e+07
269 A- M	Positive	453221	0	1.36369e+07	5.09131e+06	1.04044e+07	1.7825e+06	378661	1.75764e+07	4.6778e+06	169046	483359	950244	5.8083e+07	2.2021e+07	5.11131e+07	18285.5	487157	490205	158577	159025	1.66673e+07	2.53277e+06	259879	14912.5	318831	4.74843e+06	1.20207e+07	2.44206e+06	235326	29865.3	6.62651e+07	311211	648803	1.55325e+06	9.87869e+06	1.62298e+06	2.62636e+08	6.07348e+06	3.22911e+06	2.63646e+07	580881	1.23237e+08	8.75791e+07	368870	1.51297e+06	6.22246e+07	1.18186e+08	6.44469e+07
271 M	Positive	295723	456490	8.38455e+06	4.81357e+06	2.33254e+06	2.12099e+06	305024	1.13794e+07	3.23665e+06	21603.3	684884	721676	1.85175e+07	5.37937e+07	2.07933e+08	14134.7	238697	79441.9	625240	34715.9	8.60224e+06	1.83838e+06	184181	19131.8	53454.2	2.0483e+07	2.31727e+07	9.52607e+06	513586	123681	1.59312e+08	1.10722e+06	608073	3.27579e+06	1.32415e+07	2.03587e+06	1.65519e+08	7.06455e+06	6.88061e+06	2.91727e+07	1.91259e+06	1.00346e+08	5.00695e+07	651416	5.45418e+06	5.83455e+07	8.33803e+07	3.74487e+07
274 M	Positive	171899	0	1.65173e+07	7.29718e+06	1.42795e+07	984453	334171	1.38532e+07	4.16383e+06	0	678010	337715	6.6602e+07	9.00517e+06	4.51828e+07	10795.5	95915.1	87855.6	86481.3	89631.3	1.19351e+07	3.0339e+06	325993	8553.82	161657	1.03938e+07	1.0976e+07	5.44866e+06	341667	93583.2	1.05711e+08	169240	547395	1.78777e+06	9.9178e+06	1.48476e+06	2.42964e+08	3.46998e+06	5.01213e+06	3.10099e+07	1.49639e+06	1.91814e+08	3.74037e+07	586759	1.73518e+06	9.65463e+07	8.77015e+07	8.50374e+07
282 M	Positive	141247	0	1.45335e+07	6.57766e+06	6.04337e+06	1.86593e+06	396285	1.1149e+07	4.31699e+06	0	667476	1.59568e+06	6.16182e+07	2.59377e+06	7.28668e+07	40385.4	130885	153349	77445.3	83270.5	8.89023e+06	2.85936e+06	295227	17552.9	136868	1.40358e+07	1.24431e+07	4.14883e+06	204273	45182.3	1.59272e+08	330675	688649	1.04004e+06	6.65012e+06	1.35987e+06	163253388	5.91614e+06	3.02103e+06	1.79181e+07	898043	161262493	2.35921e+07	270605	1.64429e+06	8.72012e+07	1.02531e+08	8.74998e+07
288 M	Positive	232189	0	7.03381e+06	1.63366e+06	5.01831e+06	1.47068e+06	735838	2.01595e+07	2.18064e+06	106373	329522	4.00133e+06	8.99309e+07	9.44275e+06	6.81976e+08	53929.8	1.01299e+06	349446	352072	11074.9	1.04919e+07	6.28672e+06	90473.9	51400.5	12547.5	1.43534e+06	5.63663e+06	2.30047e+06	243196	499284	1.73866e+07	636183	440843	960673	6.1548e+06	865081	8.31861e+07	5.25272e+06	2.02482e+06	8.84321e+06	618157	7.00712e+07	2.41315e+07	495711	2.79816e+06	1.98597e+07	2.608e+07	4.93121e+07
291 M	Positive	304954	0	1.66299e+07	8.15356e+06	9.90064e+06	610119	117621	1.16307e+07	4.21828e+06	78769.1	688564	796175	4.24419e+07	3.22395e+07	5.72354e+07	20209.4	326317	237780	380211	31327.3	1.05085e+07	2.92933e+06	355367	11285	28995.8	6.14536e+06	1.10186e+07	3.66964e+06	346246	73616.9	1.13246e+08	403537	198310	2.30721e+06	1.33651e+07	1.49205e+06	2.85667e+08	2.3251e+06	4.69131e+06	3.04031e+07	918231	1.13246e+08	6.89681e+07	918330	3.98209e+06	9.91672e+07	117327414	7.34572e+07
270 M	Positive	99072.3	0	1.76509e+07	6.92372e+06	1.24385e+07	1.4719e+06	209866	1.69401e+07	4.47509e+06	30612	494557	253804	4.73849e+07	3.73156e+07	3.10371e+07	15808.3	33213.3	123973	46675.9	128895	8.08351e+06	3.31946e+06	306328	4640.25	179632	6.92377e+06	7.09425e+06	4.02197e+06	208017	35489.9	1.4097e+08	310476	334262	1.38577e+06	6.89695e+06	1.39677e+06	1.97832e+08	4.79489e+06	2.66818e+06	2.19155e+07	832260	2.03755e+08	2.58248e+07	372056	994107	8.4819e+07	1.11355e+08	1.06379e+08
274 A-M	Positive	142502	0	1.56869e+07	8.56069e+06	1.04579e+07	1.10777e+06	367260	1.37696e+07	3.45797e+06	18945.4	705610	327369	6.72793e+07	9.67358e+06	3.04151e+07	8509.25	125367	92040.5	110253	17663.8	1.2811e+07	3.35239e+06	390846	5086.46	99043.1	6.56775e+06	9.06354e+06	5.67012e+06	317730	68985.5	8.48835e+07	265582	325255	1.65862e+06	8.07742e+06	1.63913e+06	3.13738e+08	3.40647e+06	5.82481e+06	3.53827e+07	1.73585e+06	1.53383e+08	3.17224e+07	590989	1.91844e+06	1.13294e+08	9.32499e+07	8.09618e+07
277 M	Positive	1.49086e+06	110026	5.96036e+06	7.15244e+06	2.35297e+06	2.24665e+06	1.64342e+06	1.10125e+07	1.60695e+06	10685.1	386341	1.22413e+06	4.8137e+07	2.878e+07	158943052	7201.41	142907	411920	336953	5416.63	3.11074e+07	3.007e+06	311787	839622	138782	7.15244e+06	3.94519e+07	3.66529e+06	866358	350426	7.09567e+07	326721	570372	5.84683e+06	1.2091e+07	1.53367e+06	1.32831e+08	7.09567e+06	6.30096e+06	2.82124e+07	501980	1.39075e+08	8.62834e+07	467194	5.10917e+06	8.62834e+07	6.13066e+07	1.04448e+08
280 M	Positive	287257	0	1.12559e+07	9.26448e+06	5.22717e+06	2.08427e+06	1.81153e+06	9.00473e+06	2.77516e+06	29073.9	858464	517460	4.00884e+07	1.87021e+07	4.57163e+07	23895.7	220498	102921	211747	91633.8	8.74498e+06	3.89072e+06	406064	20551.4	108719	5.02758e+06	8.1477e+06	4.89781e+06	272420	73976.4	4.09542e+07	642174	412804	1.81639e+06	1.09096e+07	1.44014e+06	2.48496e+08	6.75026e+06	4.16565e+06	2.9958e+07	1.53133e+06	1.81826e+08	4.3292e+07	439874	2.39333e+06	1.21218e+08	9.09131e+07	9.09131e+07
286 M	Positive	922026	1.35128e+06	9.30015e+06	5.77022e+06	4.18888e+06	638416	482851	1.42868e+07	3.31312e+06	15403.2	474274	1.54677e+06	7.64762e+07	8.55105e+07	4.02341e+07	14801.9	85063	311029	289354	49643.3	9.16101e+06	2.30543e+06	235539	434838	61028.2	1.18706e+07	32880579	7.54042e+06	838045	425126	9.87468e+07	534224	964747	5.27545e+06	1.6808e+07	1.45288e+06	1.53373e+08	2.19014e+06	6.43572e+06	1.77534e+07	626213	9.9167e+07	1.31312e+08	1.77262e+06	8.00849e+06	6.84925e+07	4.80077e+07	1.85938e+08
292 M	Positive	275532	264682	4.43204e+06	631050	696536	480101	2.09202e+06	4.72636e+06	1.10079e+06	37880.4	85762.1	2.09712e+06	4.81195e+07	3.19202e+08	3.2262e+08	39429.3	1.39695e+06	503087	223899	7505.7	4.0384e+06	3.74337e+06	31536.7	514429	26554.4	8.95406e+06	2.58369e+07	1.22579e+06	198322	462897	5.47496e+07	419603	5.79276e+06	1.44063e+06	5.93656e+06	1.19668e+06	6.27468e+07	1.61462e+06	2.95694e+06	1.19615e+07	776782	2.90494e+07	8.27054e+07	329220	902753	8.06549e+06	2.11206e+07	6.97186e+07
269 M	Positive	1.91519e+06	0	7.84719e+06	2.2299e+06	2.49137e+06	675461	4.89091e+06	1.02908e+07	1.8549e+06	50362.1	350521	2.17998e+06	9.85144e+07	3.26625e+07	1.87019e+08	46927.1	57417.8	106467	294346	7735.19	1.68581e+07	1.93226e+06	59072.2	741795	6581.67	1.61996e+07	1.33021e+07	4.48031e+06	408985	279112	1.11421e+08	622943	694831	3.53611e+06	1.19483e+07	1.77995e+06	1.09841e+08	2.26984e+06	3.75668e+06	9.51546e+06	1.11214e+06	8.86366e+07	9.24561e+07	646800	1.67222e+06	2.77895e+07	2.10726e+07	1.61996e+08
270A- M	Positive	1.33611e+06	255727	8.60058e+06	5.19392e+06	5.06472e+06	1.01257e+06	2.13009e+06	1.24822e+07	2.65695e+06	36480.2	1.03853e+06	1.22684e+06	6.13729e+07	9.09814e+07	7.12903e+07	24513.8	13848	50362.5	186938	15374.1	1.45168e+07	2.23263e+06	302199	975466	57113.5	2.44342e+07	1.26665e+07	6.54586e+06	513730	450892	1.39993e+08	766231	883572	7.15403e+06	1.34139e+07	1.9279e+06	1.76788e+08	3.34039e+06	3.40792e+06	1.26039e+07	987398	1.28495e+08	5.40426e+07	1.12936e+06	3.55918e+06	6.12292e+07	2.86024e+07	1.83975e+08
273 M	Positive	643163	2.27659e+06	4.43665e+06	5.13381e+06	528455	507400	3.1777e+06	3.50308e+06	1.1587e+06	28653.2	280444	627065	1.32748e+07	3.45438e+07	1.96555e+08	25106.8	235188	332117	750657	7798.31	1.7822e+07	1.63834e+06	207741	1.24968e+06	43619.4	1.58417e+07	1.97288e+07	3.86376e+06	400216	186298	5.20724e+07	413448	1.25471e+06	1.01989e+06	4.46974e+06	1.50872e+06	2.19291e+08	1.88688e+06	4.63609e+06	3.29303e+07	776671	8.5076e+07	3.49105e+07	373880	2.73287e+06	6.60806e+07	4.39315e+07	1.49616e+08
275 M	Positive	1.29372e+06	325794	6.78324e+06	7.88754e+06	965784	956672	1.4505e+06	1.06652e+07	1.78528e+06	30198.5	770557	830300	3.71842e+07	2.20991e+07	9.22399e+07	16306.5	17838.5	85260.6	242558	3693.22	4.27064e+06	3.36804e+06	362325	1.02057e+06	0	2.09461e+07	2.00814e+07	5.94327e+06	720374	591775	1.14339e+08	426816	836502	5.71174e+06	1.21065e+07	1.74893e+06	2.10422e+08	3.16189e+06	5.24331e+06	2.0754e+07	1.4326e+06	1.59498e+08	4.97711e+07	1.18246e+06	3.98416e+06	1.01848e+08	2.9978e+07	1.90245e+08
278 M	Positive	841418	23053.7	9.2281e+06	5.9748e+06	1.82802e+06	1.24945e+06	2.6888e+06	7.36628e+06	1.75244e+06	33937.7	450168	1.22791e+06	4.55072e+07	1.75515e+07	1.56516e+08	16932.8	110134	122277	341998	46775.4	9.04716e+06	3.16686e+06	294724	1.51608e+06	111951	1.95419e+07	1.93609e+07	5.72097e+06	473977	180109	1.04042e+08	708020	718525	2.95542e+06	9.49951e+06	1.60496e+06	1.97228e+08	4.3379e+06	4.69482e+06	2.00847e+07	1.27431e+06	145659221	8.43195e+07	687068	4.36743e+06	8.48623e+07	4.91261e+07	7.20154e+07
281 M	Positive	809597	130718	3.3688e+06	3.12681e+06	625198	1.32046e+06	3.18659e+06	7.44479e+06	1.7327e+06	15282.5	457338	640271	2.21967e+07	1.94027e+08	2.15758e+08	20644	87274.3	147687	332758	4512.93	7.76108e+06	1.34645e+06	125067	520855	25493.2	2.00236e+07	2.63101e+07	5.89101e+06	648594	245812	1.80833e+08	544935	1.52474e+06	2.78978e+06	1.13312e+07	1.50478e+06	7.19452e+07	4.36028e+06	3.60438e+06	1.96355e+07	479482	9.08046e+07	2.96473e+07	912039	4.25705e+06	3.80293e+07	2.28176e+07	9.3909e+07
284 M	Positive	625712	126717	9.7506e+06	5.47961e+06	2.06781e+06	2.04764e+06	2.62722e+06	8.67639e+06	2.08111e+06	51789.5	541001	1.12546e+06	7.01548e+07	1.42954e+08	9.50271e+07	54170.8	190843	66050.8	240495	8375.33	1.94186e+07	2.31043e+06	175716	562255	63055.7	1.95012e+07	1.23948e+07	2.50954e+06	693890	258731	1.25601e+08	351547	673099	4.16879e+06	8.00665e+06	1.20654e+06	1.06596e+08	6.4573e+06	2.8097e+06	1.45433e+07	784902	1.18164e+08	7.63522e+07	402574	2.34474e+06	6.69321e+07	4.64393e+07	7.189e+07
287 M	Positive	691851	3.09489e+06	1.14908e+07	6.87268e+06	2.45693e+06	1.37083e+06	2.25761e+06	2.24859e+07	4.34337e+06	92398.3	545346	1.14349e+06	6.45992e+07	2.57254e+07	1.13001e+08	23502.5	38319.3	117712	357951	0	483060	2.95284e+06	274706	1.01197e+06	9443.42	2.74404e+07	3.52533e+07	8.49371e+06	868806	649571	1.58544e+08	1.25204e+06	2.07743e+06	1.32003e+07	2.68687e+07	1.90399e+06	7.67949e+07	4.70022e+06	4.33371e+06	1.08044e+07	988625	129770109	106331455	1.60663e+06	5.87499e+06	8.38456e+07	3.54438e+07	1.25768e+08
294 M	Positive	2.37022e+06	41105.8	7.63717e+06	7.05759e+06	668649	620619	2.29979e+06	9.40518e+06	1.5218e+06	212191	806658	2.61993e+06	5.23431e+07	4.75349e+07	9.49606e+07	37339.2	42604.7	136245	592386	14482.7	1.13647e+07	3.20909e+06	322583	961605	28440.2	2.08717e+07	1.49708e+07	1.13647e+07	725990	234327	1.13647e+08	1.63695e+06	977819	2.83805e+06	1.11461e+07	2.75321e+06	1.45337e+08	1.73802e+06	8.27808e+06	2.30572e+07	1.49358e+06	8.58907e+07	8.55629e+07	1.19713e+06	6.68803e+06	8.53443e+07	3.00508e+07	193417983
302 M	Positive	1.49872e+06	345635	7.76844e+06	5.31132e+06	1.14807e+06	1.33951e+06	2.40596e+06	8.39928e+06	1.4331e+06	196716	534859	594170	6.40903e+07	2.26421e+07	1.60928e+08	9439.55	81628.8	63056.6	239415	31971.1	9.00193e+06	2.21412e+06	204562	725614	89331.3	1.47829e+07	1.6467e+07	3.45784e+06	346610	260040	8.99136e+07	826896	1.05286e+06	2.62583e+06	10104752	1.41383e+06	1.53443e+08	4.82999e+06	2.94176e+06	1.13211e+07	1.00929e+06	156249406	3.23726e+07	458729	2.18016e+06	6.29676e+07	2.83494e+07	2.03966e+08
304 A-M	Positive	724626	160543	4.99272e+06	2.16388e+06	2.7884e+06	1.2369e+06	1.58682e+06	1.23997e+07	2.28945e+06	23064.4	429873	1.18929e+06	5.28435e+07	1.12996e+07	5.20323e+08	45215.2	135096	122409	257562	10532.5	8.10955e+06	8.63435e+06	134489	193559	53761.8	3.64243e+06	8.5211e+06	6.08956e+06	751658	329557	3.78944e+07	1.47555e+06	1.36486e+06	3.69604e+06	1.74986e+07	1.3571e+06	7.88017e+07	4.75624e+06	3.61562e+06	5.50871e+06	490254	8.32054e+07	5.60883e+07	1.36559e+06	4.12605e+06	2.54947e+07	1.72669e+07	1.47174e+08
307 M	Positive	919884	23975.3	3.79509e+06	4.65563e+06	603112	1.89305e+06	1.99494e+06	7.1825e+06	527981	27144.2	579067	888345	3.2045e+07	6.24325e+07	2.2984e+08	33278	147607	259184	405511	18561.5	2.28735e+07	2.36073e+06	224940	1.30582e+06	50618	1.6796e+07	1.93375e+07	3.099e+06	388918	150913	1.01107e+08	252958	991759	1.57255e+06	5.8565e+06	2.12124e+06	1.34257e+08	6.24325e+06	5.746e+06	2.77907e+07	893948	1.37572e+08	4.64652e+07	444435	2.95748e+06	6.24325e+07	4.96697e+07	9.88974e+07
310 M	Positive	803010	27630	8.20222e+06	4.39513e+06	3.41148e+06	1.52973e+06	1.77167e+06	6.03363e+06	1.40248e+06	35237.8	379973	650337	4.4283e+07	6.86335e+06	2.0815e+08	33808.5	132141	128995	276190	14825.3	6.14164e+06	2.05386e+06	181035	828442	2.95926e+06	2.03049e+07	1.59174e+07	3.84059e+06	284683	305425	1.04075e+08	299752	928952	2.10669e+06	7.00144e+06	1.36388e+06	7.90768e+07	5.01895e+06	3.46098e+06	9.07913e+06	1.12998e+06	2.89778e+08	4.85684e+07	362424	1.98219e+06	5.50987e+07	2.82636e+07	1.15299e+08
316 M	Positive	1.59194e+06	447694	6.55166e+06	8.61878e+06	3.17635e+06	578930	1.32014e+06	7.5554e+06	1.56237e+06	49530.1	678082	1.67576e+06	5.35825e+07	25834428	6.61276e+07	33730.9	31740.1	111974	339654	1599.22	6.15659e+06	3.5694e+06	391129	1.47057e+06	11110.7	2.04124e+07	1.49903e+07	8.53364e+06	621161	211337	9.50452e+07	443943	1.27348e+06	1.67801e+06	9.52154e+06	1.88139e+06	189239843	2.13968e+06	5.03538e+06	1.71166e+07	1.56497e+06	1.84987e+08	60280332	1.07165e+06	2.77637e+06	1.04613e+08	4.23132e+07	2.10503e+08
295 M	Positive	453025	141431	7.18774e+06	1.07407e+07	573041	552209	3.17282e+06	1.3708e+07	7.24119e+06	72264.5	804576	1.29681e+06	4.47293e+07	3.04159e+07	7.08512e+07	12930.2	42746	138344	763563	0	9.86996e+06	4.55051e+06	423300	695193	10811.4	1.70466e+07	2.61219e+07	1.32113e+07	963240	542015	1.41702e+08	1.55036e+06	2.0439e+06	8.19275e+06	1.64704e+07	2.72157e+06	5.1886e+07	1.75752e+06	6.68303e+06	2.5943e+07	63455.5	7.17458e+07	8.57013e+07	2.15725e+06	8.13063e+06	1.38303e+08	101267121	1.25421e+08
303 M	Positive	693806	38361.5	4.0857e+06	2.445e+06	1.09606e+06	2.4335e+06	1.68866e+06	8.02754e+06	1.07328e+06	26989.2	562997	2.381e+06	4.78441e+07	1.58624e+07	4.88717e+08	116170	182909	106924	131475	16283.9	1.0789e+07	3.47601e+06	34455.6	541354	41080.9	7.44956e+06	6.80735e+06	2.55617e+06	222123	273066	5.9468e+07	472987	1.08671e+06	2.11238e+06	4.66883e+06	1.02049e+06	9.69727e+07	7.77066e+06	2.50602e+06	8.92663e+06	636375	1.23303e+08	3.41652e+07	315061	1.30695e+06	3.15964e+07	2.0101e+07	1.0789e+08
305 M	Positive	143448	23990.5	6.48135e+06	1.13478e+07	1.38539e+06	1.24317e+06	2.19953e+06	5.71711e+06	1.19729e+06	492917	410714	1.39243e+06	6.79222e+07	1.85018e+07	1.08544e+08	9175.35	34713.2	16075.2	290364	65288.6	7.91742e+06	4.92119e+06	513903	2.19121e+06	138892	2.97673e+07	9.86763e+06	3.77818e+06	312760	175878	1.61171e+08	539988	559111	2.68726e+06	6.35535e+06	1.24962e+06	1.59527e+08	3.9153e+06	3.4426e+06	1.7515e+07	1.37415e+06	1.29924e+08	6.31528e+07	591749	1.87835e+06	1.40614e+08	4.83514e+07	7.81187e+07
311 M	Positive	1.88937e+06	1.55579e+06	7.10276e+06	7.31796e+06	3.24456e+06	1.51116e+06	1.62203e+06	1.51028e+07	1.91833e+06	90837.9	1.1021e+06	1.45332e+06	5.11914e+07	2.8186e+07	5.73378e+07	12957.8	125742	128787	274853	32814.6	2.44103e+07	3.34337e+06	303200	1.31749e+06	45323.9	1.71223e+07	1.5015e+07	1.60837e+06	449696	782655	6.02354e+07	695220	1.00732e+06	1.30832e+07	1.20295e+07	1.23404e+06	1.80882e+08	4.86757e+06	4.10399e+06	1.58052e+07	1.29316e+06	1.56296e+08	9.30752e+07	706962	3.32926e+06	9.1319e+07	4.84693e+07	1.96687e+08
314 M	Positive	642245	320123	7.04387e+06	1.09418e+07	4.25164e+06	861492	2.93324e+06	7.14626e+06	2.30839e+06	39202.6	514289	381065	3.51133e+07	9.58901e+07	1.52191e+08	3.22286e+07	61818.1	50048.7	411818	25417.9	1.58159e+07	2.55152e+06	212268	877174	41821.7	2.24805e+07	9.76491e+06	3.69904e+06	480844	205615	1.17376e+08	321092	964605	1.70363e+06	8.99951e+06	1.86827e+06	9.52932e+07	9.9471e+06	3.79708e+06	9.12151e+06	978230	1.5617e+08	2.83492e+07	526371	2.32871e+06	5.95831e+07	2.61609e+07	1.28318e+08
320 M	Positive	1.85986e+06	2.22157e+06	4.44987e+06	1.41984e+07	1.29588e+07	410348	1.64211e+06	4.28583e+07	3.24681e+07	357579	655093	974811	3.59101e+07	3.49028e+07	7.84195e+07	3.06233e+07	74976.5	137132	450588	94851.4	1.77662e+07	1.98363e+06	138631	569220	126995	1.08924e+07	1.96901e+07	1.00484e+07	1.97211e+06	992254	1.11158e+08	2.42806e+06	4.78372e+06	1.20923e+07	5.39579e+07	6.15236e+06	1.18771e+08	1.3908e+06	8.436e+06	6.49024e+06	119639	7.58908e+07	6.14753e+07	3.31441e+06	6.63613e+06	5.62482e+07	6.29408e+07	1.13442e+08
322 M	Positive	1.69708e+06	1.00683e+06	1.4361e+07	1.94533e+06	4.53097e+06	2.52775e+06	2.84705e+06	8.78934e+06	3.01585e+06	442658	313034	1.50463e+06	9.20689e+07	1.2584e+08	4.67891e+07	17134.9	29609.5	82464.3	204013	36664	9.62788e+06	914963	78985.5	753200	128819	3.22618e+07	1.43574e+07	4.55754e+06	494566	479120	149989274	414603	1.32766e+06	1.86817e+06	1.03233e+07	1.86658e+06	1.00936e+08	8.91735e+06	2.51986e+06	1.1673e+07	1.41622e+06	1.80176e+08	5.9807e+07	990520	1.92148e+06	2.54699e+07	2.50925e+07	1.33764e+08
301 M	Positive	495667	774403	7.60831e+06	5.13204e+06	1.00822e+06	772875	2.22151e+06	1.00773e+07	2.1266e+06	526180	1.23937e+06	5.19973e+06	6.98786e+07	5.56591e+07	1.46258e+08	59772.9	125895	55610.4	298526	40646.4	2.15324e+07	3.10037e+06	220797	1.38534e+06	49928	2.88453e+07	1.22686e+07	3.96185e+06	296319	304685	1.23777e+08	1.32629e+06	1.17345e+06	3.96414e+06	1.18909e+07	1.42404e+06	1.2933e+08	2.60947e+06	3.73111e+06	1.1034e+07	848272	9.26298e+07	8.89734e+07	743609	2.54638e+06	70014059	3.94083e+07	1.36778e+08
304 M	Positive	429014	29254.5	4.09747e+06	3.49782e+06	1.7667e+06	905330	2.80667e+06	9.89693e+06	2.57643e+06	180169	243593	1.142e+06	3.33779e+07	8.18124e+06	6.31657e+08	50580.2	240231	300251	315175	26708.2	1.46513e+07	1.60097e+07	150771	332801	42841.4	4.7392e+06	8.91795e+06	4.49071e+06	244513	285415	3.66769e+07	543397	1.84409e+06	3.65771e+06	7.29994e+06	783227	4.53124e+07	3.05187e+06	2.02545e+06	8.37122e+06	40714.3	3.94907e+07	3.15343e+07	650592	2.54178e+06	4.12372e+07	2.61007e+07	7.4421e+07
306 M	Positive	314040	0	6.69482e+06	3.54845e+06	573514	2.08539e+06	2.70524e+06	7.25705e+06	854125	55453.5	362148	877980	4.88914e+07	2.02758e+07	3.45836e+08	17720.4	650578	104329	315493	19320.7	7.58667e+06	1.79525e+06	146593	745910	68452.2	2.57082e+07	6.03987e+06	2.69867e+06	192706	100856	1.44608e+08	422942	827890	1.67545e+06	4.03042e+06	1.41592e+06	1.2089e+08	6.42241e+06	2.85598e+06	1.13238e+07	995475	1.06352e+08	3.81797e+07	387696	1.39193e+06	4.54484e+07	1.81334e+07	6.14395e+07
309 M	Positive	973062	24387.9	7.14685e+06	8.00182e+06	2.58984e+06	683620	2.28245e+06	1.05288e+07	2.25882e+06	343649	933230	1.20988e+06	7.96543e+07	1.49726e+07	1.3655e+08	30212.8	67624.4	193842	293490	19445.2	3.90486e+07	3.56091e+06	335559	1.23484e+06	32263.2	1.65298e+07	2.29979e+07	4.77714e+06	407545	396521	1.10318e+08	997951	953225	5.28141e+06	12217646	1.72558e+06	1.19781e+08	2.52118e+06	4.99417e+06	1.76078e+07	273291	8.03729e+07	6.45619e+07	1.10196e+06	4.41245e+06	9.28302e+07	6.18069e+07	1.641e+08
318 M	Positive	1.32659e+06	165051	1.41352e+07	6.74684e+06	1.31591e+06	605657	773346	8.91253e+06	3.19122e+06	873564	713088	1.61093e+06	6.99384e+07	3.24494e+07	1.05829e+08	14284.2	83755.5	103421	368679	229330	3.83493e+07	2.9526e+06	281321	610326	847863	1.90517e+07	1.81913e+07	5.81719e+06	402075	440574	1.14925e+08	977304	773554	9.29951e+06	8.62676e+06	1.65182e+06	1.32748e+08	1.97152e+06	4.10474e+06	1.53643e+07	1.24588e+06	1.32748e+08	9.69795e+07	762789	2.37938e+06	8.17381e+07	4.0193e+07	1.54872e+08
320 A- M	Positive	819849	128553	4.53045e+06	8.04527e+06	1.24961e+06	1.19824e+06	1.11746e+06	5.26008e+06	1.7353e+06	18067.9	1.16256e+06	2.65964e+06	8.03451e+07	2.05828e+07	1.06525e+08	5.87693e+07	165060	244477	329597	5622.99	8.32425e+06	2.05932e+06	182555	2.41318e+06	10168.5	1.7062e+07	1.13747e+07	7.76667e+06	504568	154724	9.65946e+07	905443	809366	2.13898e+06	6.60953e+06	1.44498e+06	1.57079e+08	4.91105e+06	4.92191e+06	2.20272e+07	288026	7.61924e+07	1.17358e+08	697775	6.21698e+06	5.59707e+07	1.02011e+08	1.73329e+08
324 M	Positive	844226	0	1.0579e+07	5.6159e+06	2.22953e+06	2.71246e+06	3.8801e+06	8.62312e+06	2.17675e+06	872641	807745	1.16299e+06	5.03329e+07	1.05591e+08	9.85035e+07	136510	76314.8	108374	492229	80953.1	1.9941e+07	2.32666e+06	256449	1.32507e+06	105167	2.2824e+07	9.53216e+06	3.80198e+06	292383	190428	8.9494e+07	515617	1.26032e+06	3.57649e+06	1.07469e+07	1.39916e+06	135742645	8.6587e+06	3.63699e+06	1.00641e+07	1.41896e+06	135742645	5.50178e+07	454336	2.95722e+06	6.83518e+07	3.21938e+07	8.32475e+07
327 M	Positive	663276	1.81847e+06	1.04936e+07	8.53611e+06	4.4206e+06	1.42654e+06	2.02317e+06	1.15699e+07	1.86104e+06	179658	765021	1.40421e+06	6.87916e+07	4.31405e+07	8.35007e+07	73850.5	109536	69097.2	1.17751e+06	38517.9	1.98213e+07	3.75756e+06	351618	944262	0	1.8745e+07	1.15699e+07	4.08692e+06	475274	306361	8.00925e+07	1.88027e+06	926403	7.46848e+06	1.34534e+07	1.85585e+06	1.0673e+08	4.70709e+06	4.01819e+06	2.58305e+07	1.05827e+06	1.7041e+08	1.0673e+08	951197	4.25438e+06	1.02246e+08	7.9644e+07	7.0137e+07
330 M	Positive	1.19901e+06	379390	8.09606e+06	7.9701e+06	912325	788757	3.99779e+06	9.40841e+06	2.03782e+06	45349.7	647653	1.31513e+06	4.08988e+07	2.86674e+07	6.5489e+07	15682	77736.8	98759	299617	13727.2	6.92873e+06	3.32716e+06	324220	1.2118e+06	60476.4	2.54821e+07	16053718	1.03113e+07	522864	306417	1.12758e+08	453277	1.03965e+06	5.60973e+06	9.92809e+06	1.48952e+06	2.03857e+08	2.59667e+06	4.60615e+06	1.83471e+07	788092	1.15052e+08	3.6949e+07	964269	2.89127e+06	9.40289e+07	3.51653e+07	2.07679e+08
333 M	Positive	825195	99394.3	7.09029e+06	6.33914e+06	2.05173e+06	3.08524e+06	2.0816e+06	5.18091e+06	1.36028e+06	127238	254879	551109	5.34869e+07	1.90681e+07	1.88615e+08	55620.1	96129.1	70309.5	279749	38799.1	1.11517e+07	2.8225e+06	268180	1.09836e+06	52205.2	1.45248e+07	1.29415e+07	5.49385e+06	399849	154037	8.19169e+07	406961	760352	932486	7.02145e+06	1.29377e+06	1.69341e+08	1.02568e+07	3.58723e+06	1.74848e+07	1.10801e+06	1.70718e+08	4.06143e+07	532767	3.39594e+06	7.8475e+07	3.29044e+07	1.34234e+08
336 M	Positive	976696	91884.6	6.60647e+06	7.66367e+06	758440	1.77069e+06	3.5921e+06	9.24194e+06	1.39043e+06	129109	1.27545e+06	2.09516e+06	6.7651e+07	1.5434e+07	109979086	28809	32908.6	83890.8	412599	10363.5	1.0351e+07	3.33999e+06	287927	1.2955e+06	29477.9	2.07019e+07	15711298	6.78825e+06	469826	139527	132159742	1.19002e+06	525452	2.5996e+06	12014522	1.91084e+06	141401682	5.95632e+06	6.0186e+06	1.63582e+07	945895	162658144	4.62097e+07	616866	2.7067e+06	105358116	35119372	118296832
339 M	Positive	2.96477e+06	1.37549e+06	1.26402e+07	4.59191e+06	2.05515e+06	780456	2.36533e+06	3.59599e+07	1.04694e+07	526157	917192	1.05774e+06	3.80597e+07	3.98971e+07	7.34946e+07	21108.8	119866	220663	419032	31637.5	1.40701e+07	1.95239e+06	197271	644712	121035	1.50791e+07	2.35886e+07	1.75183e+07	1.50302e+06	615628	1.26778e+08	1.06495e+06	2.33963e+06	5.28038e+06	4.46217e+07	2.73818e+06	9.6068e+07	2.58993e+06	6.01332e+06	2.40485e+07	100451	8.79311e+07	9.37057e+07	4.45317e+06	1.10111e+07	5.82707e+07	5.30211e+07	124153438
342 M	Positive	3.13689e+06	1.17903e+06	9.67681e+06	5.4429e+06	4.90598e+06	1.12278e+06	2.23926e+06	2.04234e+07	2.19679e+06	300435	635359	1.38405e+06	5.97091e+07	2.00331e+07	1.17467e+08	14196.7	75418.6	99189	172676	36781.4	1.53501e+07	2.40838e+06	266730	764798	104655	2.4456e+07	1.39191e+07	2.24434e+06	513737	405501	1.17597e+08	913047	1.33894e+06	4.27333e+06	1.41793e+07	1.4197e+06	1.28784e+08	3.78147e+06	2.38511e+06	1.12306e+07	1.36343e+06	1.9903e+08	8.2344e+07	853824	2.4438e+06	6.94655e+07	2.43259e+07	1.44395e+08
345 M	Positive	1.13725e+06	240648	7.38779e+06	8.71055e+06	1.2724e+06	465332	2.69048e+06	9.16476e+06	1.32154e+06	627707	541334	2.26561e+06	6.78418e+07	1.2239e+08	4.88503e+07	43297.1	11999.8	101867	333809	32143.5	1.16059e+07	3.66084e+06	396661	1.35872e+06	95317.2	3.61893e+07	1.64593e+07	8.17701e+06	432335	295957	1.70923e+08	713448	1.09257e+06	5.1501e+06	1.03634e+07	1.63951e+06	1.27665e+08	1.60199e+06	5.4406e+06	1.2239e+07	1.36096e+06	8.05028e+07	9.30583e+07	902021	3.34473e+06	9.93888e+07	3.18635e+07	141381048
350 M	Positive	3.5848e+06	125084	1.20589e+07	4.69051e+06	2.34169e+06	465285	1.05353e+06	1.16538e+07	3.9819e+06	49104.2	1.01353e+06	1.13971e+06	8.45326e+07	1.92942e+08	4.65472e+07	15466.6	45315.8	87524.4	438949	12498.1	1.61589e+07	1.91203e+06	198873	869859	99427	1.95353e+07	1.36265e+07	7.81292e+06	466115	368333	1.11183e+08	1.38144e+06	794034	2.69687e+06	1.54353e+07	1.73404e+06	1.45912e+08	1.50004e+06	5.71864e+06	1.72442e+07	1.33451e+06	1.0648e+08	7.40414e+07	1.12236e+06	4.11819e+06	5.58325e+07	3.05089e+07	1.45912e+08
328 M	Positive	2.01201e+06	846557	7.13499e+06	7.46777e+06	1.47616e+06	993541	2.54547e+06	1.07395e+07	1.86591e+06	507406	670543	2.47758e+06	4.0996e+07	2.08594e+07	9.36608e+07	31417.8	27634.7	78924.4	502226	44854.8	9.13581e+06	3.24407e+06	294336	1.40042e+06	178775	1.65223e+07	1.29081e+07	5.65632e+06	376609	257820	7.39373e+07	501268	1.40384e+06	4.84618e+06	1.19787e+07	1.80667e+06	1.86909e+08	3.27316e+06	4.37754e+06	1.42505e+07	1.52591e+06	1.91039e+08	8.15789e+07	1.06526e+06	2.67972e+06	9.16988e+07	3.7485e+07	1.70386e+08
331 M	Positive	1.15172e+06	68534.4	7.45213e+06	7.70177e+06	504710	1.84902e+06	3.79329e+06	9.20668e+06	1.79951e+06	249491	936140	1.60602e+06	5.56285e+07	2.26246e+07	1.30616e+08	57612.4	126176	185612	349892	22443.4	2.0642e+07	3.28975e+06	346090	1.26494e+06	43830	2.07587e+07	1.6327e+07	5.43195e+06	380880	334576	1.28284e+08	771475	1.31177e+06	4.5472e+06	1.15241e+07	1.49766e+06	9.85453e+07	6.01015e+06	4.26562e+06	1.74932e+07	533587	1.14173e+08	8.45507e+07	865664	3.32878e+06	9.14314e+07	4.78149e+07	1.30616e+08
334 M	Positive	284085	1.66429e+06	7.85305e+06	8.85537e+06	1.8576e+06	645922	1.91561e+06	6.96304e+06	1.76348e+06	596019	480439	1.3353e+06	6.23489e+07	1.57468e+07	1.14909e+08	26549.4	39188.8	16522.2	388820	81058.6	1.64916e+07	3.82257e+06	360041	1.0979e+06	210909	1.68108e+07	1.59596e+07	5.71962e+06	348214	330723	8.38412e+07	392393	1.09511e+06	6.42184e+06	7.45398e+06	1.05498e+06	1.97899e+08	2.1898e+06	3.18039e+06	1.20229e+07	1.04894e+06	1.02993e+08	5.39435e+07	812456	2.8238e+06	1.09589e+08	3.3196e+07	2.15987e+08
337 M	Positive	2.06772e+06	212846	8.46658e+06	3.82164e+06	2.36143e+06	1.71801e+06	2.45454e+06	1.44917e+07	2.23615e+06	255433	893127	2.89275e+06	6.71537e+07	9.17379e+07	8.04809e+07	21827.3	113333	81399.1	484069	28517.3	2.05731e+07	1.61382e+06	133048	1.23451e+06	50364.8	1.43624e+07	1.48799e+07	4.86804e+06	441352	573171	9.56196e+07	593302	1.67112e+06	5.89838e+06	1.44917e+07	989038	1.4233e+08	5.58508e+06	5.10278e+06	1.24704e+07	1.279e+06	9.48433e+07	1.22533e+08	768485	2.53562e+06	4.58043e+07	2.97598e+07	1.92792e+08
343 M	Positive	1.21436e+06	388105	9.12787e+06	7.02413e+06	1.76911e+06	1.34042e+06	2.01308e+06	1.63551e+07	1.61202e+06	228660	668229	4.02363e+06	3.68521e+07	1.74171e+07	109388117	11787.7	61578.8	146377	296847	41523.4	5.21266e+06	2.85069e+06	278702	903002	41857.3	1.39125e+07	2.43203e+07	4.84093e+06	460823	377493	9.22896e+07	598248	948308	5.74337e+06	1.81606e+07	1.50624e+06	1.18946e+08	4.75463e+06	3.69899e+06	9.95084e+06	1.08142e+06	1.47621e+08	2.08156e+08	849264	4.65193e+06	8.2519e+07	2.74001e+07	1.78419e+08
348 M	Positive	700597	567238	5.05472e+06	5.22139e+06	1.36375e+06	1.57762e+06	3.43339e+06	6.02633e+06	1.10702e+06	87321.7	861794	1.23299e+06	8.24431e+07	2.17999e+07	1.27628e+08	32027.3	136438	104399	213797	29034	1.79155e+07	2.236e+06	216804	1.8057e+06	64183.8	2.57635e+07	1.35556e+07	2.55192e+06	395607	198405	1.39519e+08	529571	909116	4.81525e+06	6.56951e+06	1.0872e+06	168057133	5.23766e+06	5.11849e+06	1.52203e+07	1.13572e+06	9.75048e+07	5.0655e+07	579733	1.98644e+06	6.53203e+07	3.82092e+07	1.56959e+08
351 M	Positive	226216	1.06495e+06	1.12074e+07	4.90928e+06	2.11462e+06	645004	2.91114e+06	1.84234e+07	3.421e+06	1.07664e+06	841224	801088	5.60642e+07	2.06469e+07	1.15305e+08	24858.1	79714.6	204429	454992	80055.7	2.03292e+07	2.03225e+06	192704	1.49637e+06	229608	1.81057e+07	3.49409e+07	7.2831e+06	910832	1.29713e+06	1.15146e+08	762275	1.13813e+06	3.06527e+07	1.56261e+07	2.21978e+06	1.26581e+08	2.30062e+06	4.16016e+06	1.95351e+07	283792	105299116	5.82877e+07	1.56218e+06	6.90955e+06	6.27348e+07	3.90703e+07	1.93763e+08
329 M	Positive	1.74024e+06	437144	6.05613e+06	4.47921e+06	1.78876e+06	2.1634e+06	2.44231e+06	6.85821e+06	1.26185e+06	233923	431018	4.06738e+06	4.60368e+07	4.77793e+06	293920835	16968	106859	89587.6	90403.7	46834.8	6.71523e+06	1.96686e+06	201443	645586	132732	1.20167e+07	1.01492e+07	2.68059e+06	205290	322957	5.18827e+07	558205	896168	5.17967e+06	6.33384e+06	980638	101492001	6.79827e+06	1.98448e+06	7.33707e+06	727591	2.41957e+08	4.03532e+07	348597	1.26058e+06	5.41561e+07	1.7619e+07	1.30722e+08
335 M	Positive	2.72064e+06	334542	1.30767e+07	3.94315e+06	781123	669841	1.41913e+06	1.51647e+07	3.29568e+06	1.02001e+06	870927	2.10691e+06	6.0739e+07	3.46511e+07	1.07936e+08	33847.1	67094.2	180473	399349	76194	4.16212e+07	1.75183e+06	179601	1.61751e+06	198972	2.48931e+07	1.95375e+07	3.92561e+06	380168	521109	1.16898e+08	884196	1.6253e+06	8.64292e+06	1.28625e+07	1.74806e+06	1.20881e+08	2.25969e+06	4.52928e+06	1.02516e+07	721499	1.42986e+08	7.50774e+07	759226	1.88639e+06	5.17775e+07	4.44092e+07	1.86997e+08
338 M	Positive	1.45073e+06	139840	8.9827e+06	3.96098e+06	3.65006e+06	2.48636e+06	1.2095e+06	1.22699e+07	2.74663e+06	392429	773901	1.84584e+06	7.16095e+07	3.12035e+07	1.90395e+08	29929.1	97157.1	85414	449813	66368.7	3.41652e+07	1.72746e+06	220259	1.14147e+06	130498	1.15294e+07	1.9251e+07	3.71852e+06	487313	453140	6.7167e+07	1.28987e+06	911117	5.20363e+06	1.52316e+07	1.37939e+06	1.55489e+08	8.37548e+06	3.98761e+06	1.36449e+07	1.55127e+06	1.72413e+08	1.10006e+08	690412	3.5699e+06	4.29445e+07	5.53202e+07	7.8908e+07
349 M	Positive	1.36134e+06	83223.1	1.06812e+07	1.10843e+07	1.38739e+06	1.10403e+06	2.00865e+06	1.26965e+07	1.73494e+06	190326	569862	1.54805e+06	5.29022e+07	4.03064e+07	8.06129e+07	43732.3	56868.9	83223.1	535285	136713	2.30754e+07	5.43867e+06	450387	979181	416049	1.80371e+07	1.13866e+07	8.79362e+06	420141	354281	8.80695e+07	958001	444604	9.39303e+06	1.37042e+07	1.56079e+06	1.7231e+08	3.76821e+06	6.19106e+06	1.83394e+07	1.36917e+06	1.3805e+08	8.05121e+07	830825	6.00365e+06	1.32004e+08	4.736e+07	9.68362e+07
356 M	Positive	145729	104516	5.41812e+06	4.05843e+06	462185	669162	2.54317e+06	5.03896e+06	1.11387e+06	686993	424508	662273	4.62528e+07	229287306	9.77012e+07	13476.2	60926.7	42822.5	116080	89220.3	1.31021e+07	1.67548e+06	183591	723526	118514	2.69384e+07	9.54423e+06	3.40078e+06	273454	114221	1.68859e+08	295667	579334	952784	4.76825e+06	1.0423e+06	1.38363e+08	2.15321e+06	3.49878e+06	2.21381e+07	758932	1.08996e+08	4.54057e+07	393165	1.86164e+06	4.99236e+07	3.68215e+07	4.69305e+07
359 M	Positive	1.88219e+06	106693	8.30124e+06	5.59387e+06	898123	2.03258e+06	941292	1.34578e+07	2.40294e+06	361441	1.0008e+06	1.68812e+06	3.86794e+07	6.3901e+07	7.82999e+07	28263	47795.1	99415.6	603036	24604.3	6.93433e+06	2.4791e+06	212786	1.3919e+06	46855	1.03522e+07	1.56223e+07	1.50577e+07	615549	387949	7.36885e+07	1.05055e+06	405869	7.50841e+06	1.91985e+07	1.74489e+06	1.89162e+08	7.60255e+06	9.30003e+06	1.98573e+07	1.25969e+06	9.69338e+07	9.50516e+07	1.18809e+06	7.14779e+06	7.16181e+07	4.62082e+07	2.36217e+08
362 M	Positive	1.16636e+06	501911	8.69369e+06	4.46431e+06	936513	899172	4.03453e+06	1.21429e+07	1.79797e+06	1.13488e+06	801889	1.66323e+06	3.44002e+07	2.92537e+07	125547295	37732	75282.8	169199	203680	65321.8	1.2477e+07	1.85928e+06	191305	1.69516e+06	118603	1.10601e+07	2.73577e+07	6.00107e+06	305989	306001	4.55058e+07	587283	1.1762e+06	7.29557e+06	1.42206e+07	1.71462e+06	1.67938e+08	2.84915e+06	4.78619e+06	1.62521e+07	901832	1.25141e+08	6.31122e+07	810481	2.7637e+06	5.71531e+07	5.82366e+07	1.57103e+08
365 M	Positive	523730	2.41789e+06	6.43398e+06	7.32836e+06	593650	523499	1.87924e+06	5.92573e+06	1.598e+06	1.16727e+06	685083	2.80876e+06	4.99191e+07	3.42915e+07	9.37657e+07	26723.4	22295.4	70211.1	589804	45273.6	7.27132e+06	3.05286e+06	236470	1.54391e+06	104012	1.93782e+07	1.64313e+07	6.64803e+06	553929	184849	6.86722e+07	1.8425e+06	1.45357e+06	1.36583e+06	7.37235e+06	2.39343e+06	2.03606e+08	1.60828e+06	6.82596e+06	2.24145e+07	1.61144e+06	9.91238e+07	1.12519e+08	857411	4.26213e+06	7.59949e+07	3.51845e+07	2.29503e+08
371 M	Positive	1.76972e+06	3.64071e+06	8.4962e+06	5.65178e+06	3.07361e+06	745421	1.1181e+06	1.46612e+07	3.65949e+06	210595	828357	1.33378e+06	6.14524e+07	7.11225e+07	8.20405e+07	20896.5	60671.1	69634.3	240712	71156.7	1.03805e+07	2.3844e+06	258465	980980	131323	1.6013e+07	1.36214e+07	5.15099e+06	455037	776906	7.36181e+07	1.58556e+06	827192	1.37254e+07	1.89244e+07	3.68145e+06	1.78846e+08	2.53209e+06	5.69277e+06	1.43493e+07	1.40837e+06	118537565	100652950	1.60355e+06	3.12713e+06	6.59235e+07	4.04483e+07	2.14199e+08
374 M	Positive	920458	133759	7.61874e+06	5.12511e+06	1.39396e+06	2.39216e+06	669653	7.39497e+06	2.27751e+06	333446	340542	1.2364e+06	5.69684e+07	1.53575e+08	5.17349e+07	11974.8	53686.4	57797.2	232486	69352.6	1.08961e+07	2.12262e+06	230952	1.0414e+06	104300	2.4795e+07	1.19256e+07	5.49069e+06	458906	198400	1.53575e+08	343312	478746	1.48393e+06	9.26595e+06	923702	1.6387e+08	7.78692e+06	3.74326e+06	1.40705e+07	1.31663e+06	1.25262e+08	6.49475e+07	885626	3.98698e+06	6.21162e+07	3.29456e+07	1.63012e+08
377 M	Positive	1.23513e+06	281147	1.36954e+07	1.01061e+07	2.9489e+06	1.21113e+06	749792	1.57377e+07	3.81619e+06	65517.4	977243	1.46745e+06	4.31285e+07	4.5411e+07	6.72756e+07	13366.3	49830.4	76167.1	434849	0	2.72944e+06	4.00588e+06	369330	988290	36434.1	1.93417e+07	1.27343e+07	6.60557e+06	539077	371861	1.35753e+08	1.32464e+06	766742	5.18725e+06	1.99424e+07	2.11126e+06	1.5978e+08	4.16074e+06	3.4771e+06	1.52571e+07	1.38269e+06	1.83807e+08	7.50844e+07	1.40065e+06	3.82381e+06	1.17852e+08	4.92554e+07	104757738
354 M	Positive	458215	580665	1.02014e+07	4.62772e+06	4.02055e+06	1.23401e+06	4.11346e+06	1.27988e+07	2.28672e+06	104504	585725	1.41463e+06	5.61724e+07	1.97907e+07	2.31089e+08	11373.8	782784	60865.7	594677	22655.2	1.06071e+07	2.08277e+06	136746	896042	37241.3	1.52874e+07	1.93167e+07	2.75643e+06	539603	492401	9.46872e+07	666933	536590	2.39367e+06	1.09979e+07	1.85441e+06	1.03101e+08	3.97053e+06	4.27523e+06	1.03636e+07	1.1614e+06	1.49319e+08	1.15545e+08	550975	2.62809e+06	5.88981e+07	2.96268e+07	6.75491e+07
357 M	Positive	921158	108762	7.75283e+06	7.56738e+06	2.299e+06	622110	2.75201e+06	9.57703e+06	1.75282e+06	2.19543e+06	451855	1.70282e+06	4.34007e+07	2.14343e+08	9.12098e+07	16958.2	132770	85198.9	515055	185623	8.74094e+06	3.24138e+06	348897	933203	186113	2.06742e+07	1.23893e+07	4.4094e+06	357581	93284	1.33014e+08	972143	1.23796e+06	1.07159e+06	1.26174e+07	1.24898e+06	1.05651e+08	2.04638e+06	4.30531e+06	1.45936e+07	836298	1.13252e+08	5.51059e+07	591959	3.36769e+06	66203122	3.08593e+07	4.78852e+07
369 M	Positive	2.05796e+06	307750	9.65974e+06	3.16568e+06	1.65889e+06	965920	3.58347e+06	1.20125e+07	2.02182e+06	218510	790371	2.02662e+06	6.50488e+07	1.74521e+07	1.15592e+08	61861.1	327308	122385	420532	107156	4.02305e+07	2.87861e+06	185076	1.92647e+06	207110	1.96053e+07	2.16451e+07	8.14924e+06	492712	180593	1.03013e+08	779069	1.19337e+06	1.85556e+06	1.63189e+07	1.54187e+06	1.34857e+08	3.37761e+06	7.18854e+06	1.9492e+07	1.60809e+06	1.13325e+08	1.13325e+08	699023	4.0615e+06	4.95232e+07	4.29503e+07	1.15592e+08
375 M	Positive	438870	27281.1	5.64448e+06	7.07697e+06	1.32687e+06	3.25174e+06	2.04921e+06	4.86841e+06	1.1803e+06	54579.6	369128	685297	5.07352e+07	3.8288e+07	272965437	9311.01	114210	71091.8	347961	18462.7	8.80768e+06	3.09062e+06	220117	1.21474e+06	59636.8	1.92168e+07	16450717	3.9064e+06	267378	167900	1.26656e+08	569265	651955	2.43797e+06	5.66579e+06	1.29611e+06	1.36119e+08	10409082	2.92399e+06	1.46309e+07	1.21711e+06	1.13554e+08	4.31649e+07	331056	1.96614e+06	8.73489e+07	3.63226e+07	1.22289e+08
381 M	Positive	344098	227515	2.97919e+06	5.85792e+06	1.31319e+06	384233	3.1722e+06	3.43513e+06	819814	119722	289960	1.62715e+06	6.97625e+07	1.57099e+08	8.3076e+07	14363.8	137669	102517	113048	37041.1	1.05443e+07	2.56311e+06	229711	1.62788e+06	22917.2	1.4059e+07	1.58164e+07	2.47855e+06	259633	132356	8.68038e+07	273849	872491	1.67595e+06	4.30917e+06	1.05002e+06	1.03312e+08	1.2942e+06	4.03593e+06	1.90116e+07	461968	7.40228e+07	9.10641e+07	297120	1.33685e+06	7.29578e+07	7.6153e+07	1.29407e+08
355 M	Positive	433407	227475	8.68327e+06	5.25431e+06	1.62557e+06	1.61259e+06	4.26308e+06	6.02438e+06	2.13849e+06	619786	454154	859692	5.29958e+07	1.10274e+08	4.38955e+07	26374	52970	37630.5	211269	50470.1	1.32044e+07	2.11844e+06	212153	557800	120929	2.03418e+07	8.47574e+06	6.01324e+06	430819	239382	1.00103e+08	251062	766405	1.87127e+06	7.38284e+06	1.47172e+06	1.87359e+08	5.48545e+06	2.50126e+06	1.01833e+07	622028	1.09337e+08	3.25201e+07	835023	1.95586e+06	7.80216e+07	1.98065e+07	2.20816e+08
358 M	Positive	912868	213969	4.77821e+06	3.87805e+06	284155	811502	1.0566e+06	7.42848e+06	1.57362e+06	107881	528589	823063	8.79601e+07	182092919	9.95338e+07	15723.3	48376.3	95936.1	306660	21473.7	2.46134e+07	1.69001e+06	155465	665734	10599.5	1.18052e+07	2.18357e+07	3.60739e+06	416156	926426	8.6417e+07	452899	851439	6.09138e+06	7.94728e+06	1.35339e+06	1.55859e+08	2.88562e+06	3.57534e+06	1.94438e+07	1.1886e+06	1.10336e+08	6.03376e+07	901626	3.62955e+06	5.79457e+07	2.79312e+07	1.65118e+08
361 M	Positive	2.225e+06	761821	9.65916e+06	4.67351e+06	1.44845e+06	536099	2.83339e+06	1.72184e+07	1.11643e+07	621046	833387	1.00982e+06	3.93646e+07	1.65156e+07	9.55998e+07	44260.1	43941.7	185278	595737	106733	1.30454e+07	1.94851e+06	196989	566211	216483	1.24866e+07	2.02068e+07	1.08288e+07	577446	684477	8.40568e+07	781708	1.42655e+06	6.59751e+06	2.19486e+07	2.99861e+06	1.67818e+08	1.84048e+06	4.50353e+06	1.3258e+07	36398.1	7.96172e+07	4.43962e+07	1.93532e+06	4.31275e+06	6.18587e+07	7.19218e+07	205702364
364 M	Positive	1.36395e+06	648755	8.11068e+06	5.4166e+06	733580	974198	2.7479e+06	9.96575e+06	1.81953e+06	523355	1.00182e+06	1.95091e+06	5.12855e+07	4.56907e+07	9.05525e+07	18671.3	28234.2	116250	389745	38722.6	7.46685e+06	2.26348e+06	240474	1.43897e+06	111823	2.30008e+07	1.4505e+07	6.82987e+06	465792	268033	133653020	700668	2.02935e+06	2.78859e+06	1.23292e+07	1.9054e+06	1.69915e+08	3.30248e+06	4.61472e+06	1.5541e+07	1.27222e+06	120184111	8.73407e+07	862971	3.06954e+06	8.12279e+07	2.84919e+07	1.93745e+08
367 M	Positive	1.7816e+06	164388	1.00602e+07	2.20716e+06	1.72946e+06	660657	4.54544e+06	1.20252e+07	5.61015e+06	8.39614e+06	859771	1.3766e+06	6.69662e+07	3.70381e+07	1.11776e+08	27934.6	168825	336211	251010	192787	4.21639e+07	1.79888e+06	140082	1.18803e+06	298189	1.02958e+07	1.60596e+07	8.55845e+06	428486	320936	6.39899e+07	1.21494e+06	850946	4.38779e+06	1.49293e+07	1.94954e+06	1.01028e+08	2.09256e+06	4.32838e+06	1.64012e+07	107263	8.84615e+07	7.32494e+07	840792	3.53268e+06	3.43925e+07	6.34939e+07	1.78577e+08
370 M	Positive	627934	163400	1.36584e+07	9.49423e+06	2.64673e+06	973144	2.62429e+06	1.48062e+07	3.45617e+06	538154	685237	1.84461e+06	6.35863e+07	4.16639e+07	7.0932e+07	15332.7	59705.3	42389.5	472144	231764	1.68722e+07	4.19285e+06	549837	1.34389e+06	342294	2.31849e+07	1.14777e+07	7.33017e+06	569331	144478	1.20516e+08	1.35586e+06	865683	3.57808e+06	1.87086e+07	1.63452e+06	1.15924e+08	3.5236e+06	4.60264e+06	2.07746e+07	1.12979e+06	1.103e+08	1.01922e+08	1.06771e+06	5.53796e+06	1.1317e+08	5.33712e+07	7.01286e+07
376 M	Positive	363836	206673	7.58924e+06	1.46222e+06	1.1211e+06	837565	1.09199e+06	8.45946e+06	1.32846e+06	44695.1	326582	1.84213e+07	7.03358e+07	3.53442e+07	5.32366e+08	75118.5	651964	110946	226709	53793.6	9.60727e+06	8.99028e+06	53322.9	526077	90321.5	1.05768e+07	2.81467e+06	2.28373e+06	179566	215604	7.2363e+07	737036	887289	1.64672e+06	4.31831e+06	674589	1.09294e+08	2.9508e+06	1.79314e+06	5.64983e+06	663853	115463463	2.92625e+07	479432	879354	1.66585e+07	1.56889e+07	5.75555e+07
379 M	Positive	1.03156e+06	329774	9.81147e+06	9.17555e+06	2.46406e+06	1.19116e+06	2.61963e+06	9.72063e+06	2.39262e+06	220333	324360	655955	3.04337e+07	4.07903e+07	130819653	51436.6	62784.8	167971	837620	90909.2	1.80785e+07	4.05803e+06	344947	974853	214650	2.14399e+07	2.49829e+07	7.03057e+06	477923	130219	1.04474e+08	218847	575131	3.15332e+06	1.1901e+07	1.54062e+06	1.65342e+08	3.80565e+06	4.68696e+06	3.13422e+07	1.42385e+06	1.68975e+08	4.28798e+07	752104	4.67331e+06	1.14467e+08	4.6332e+07	5.62343e+07
383 M	Positive	301401	283736	8.81297e+06	6.61833e+06	3.21733e+06	1.2458e+06	1.82735e+06	1.02293e+07	2.42746e+06	37350.6	841606	860140	6.79858e+07	3.73764e+07	1.07802e+08	9309.94	120278	88211.4	322222	22923.3	2.61242e+07	2.76076e+06	249460	220567	57803.9	3.44275e+06	1.67604e+07	2.2127e+06	328502	182467	1.81768e+07	506134	353541	4.13042e+06	7.94741e+06	1.08968e+06	2.02226e+08	4.26817e+06	5.59326e+06	2.07734e+07	939630	1.94358e+08	6.23203e+07	686123	2.64114e+06	7.86086e+07	7.55398e+07	7.42808e+07
386 M	Positive	975112	222041	7.2841e+06	5.78598e+06	1.35591e+06	768785	2.13412e+06	1.07198e+07	1.76614e+06	34166.6	1.02868e+06	1.24527e+06	5.68973e+07	4.48375e+07	8.14291e+07	33370.3	25070.3	90747.9	411042	9800.04	1.60797e+07	2.54526e+06	266904	1.06111e+06	26819.5	1.73166e+07	1.31936e+07	4.31822e+06	471668	308054	9.17366e+07	458902	466873	5.80988e+06	7.4381e+06	1.46932e+06	217487830	2.50248e+06	4.28588e+06	1.44305e+07	1.06851e+06	1.41212e+08	5.00944e+07	916259	2.62028e+06	7.20493e+07	3.20563e+07	2.03057e+08
389 M	Positive	2.0671e+06	371644	6.2085e+06	4.62477e+06	1.19315e+06	509746	4.84803e+06	1.13625e+07	1.75053e+06	51125.2	799199	2.20863e+06	6.89194e+07	4.25575e+07	1.31219e+08	16527.8	53762.9	120885	642088	6115.59	8.18729e+06	2.06168e+06	186274	820351	30484.5	1.51315e+07	1.44222e+07	7.74499e+06	632396	249959	8.61788e+07	1.85084e+06	1.03344e+06	3.60032e+06	1.32401e+07	1.62979e+06	1.3713e+08	1.63944e+06	5.31017e+06	1.84416e+07	1.21174e+06	6.85648e+07	1.00838e+08	1.24172e+06	3.48771e+06	6.08808e+07	2.15152e+07	1.7023e+08
392 M	Positive	2.26928e+06	85458.5	6.43497e+06	6.53338e+06	852237	1.97318e+06	2.47802e+06	6.2929e+06	1.17753e+06	29777.8	660635	616003	4.66319e+07	2.5272e+07	1.65089e+08	19227.5	31724.7	132793	346600	0	1.17362e+07	2.67477e+06	294732	894194	6515.01	1.77608e+07	17995526	3.30041e+06	321890	507254	1.02496e+08	292492	785344	4.84977e+06	7.18267e+06	1.30486e+06	2.15164e+08	6.45579e+06	3.354e+06	1.36922e+07	1.12794e+06	1.15797e+08	3.59128e+07	493609	2.50357e+06	8.13711e+07	2.7228e+07	1.66654e+08
395 M	Positive	515434	71691.1	4.0118e+06	1.46649e+06	5.57545e+06	431281	1.65813e+06	6.32415e+06	2.72725e+06	181608	564918	1.43648e+06	5.21541e+07	2.80334e+08	8.26446e+07	28552.7	280273	98074.3	334507	12539.2	1.3005e+07	692888	61943.4	4.01937e+06	16990.6	2.14014e+07	1.61388e+07	6.33283e+06	724699	539834	1.37873e+08	630569	1.12432e+06	1.47692e+07	1.58787e+07	1.59068e+06	1.35226e+08	1.48792e+06	2.36306e+06	1.02727e+07	29433.9	4.9292e+07	6.77338e+07	1.12211e+06	5.80112e+06	1.56747e+07	1.11895e+08	7.9836e+07
400A-M	Positive	1.25246e+06	395285	6.06108e+06	4.5377e+06	1.32122e+07	649723	558031	5.35409e+06	5.24528e+06	149020	696066	1.40998e+06	3.92799e+07	1.23665e+08	7.09883e+07	105300	206545	143107	486001	7894.74	7.46681e+06	1.64776e+06	153494	2.36482e+06	22288.4	3.29856e+07	1.40187e+07	1.93188e+07	1.13135e+06	497507	1.85985e+08	2.27572e+06	1.06981e+06	6.04503e+06	2.99636e+07	1.76062e+06	1.84306e+08	2.03172e+06	5.16217e+06	1.09455e+07	91883.3	7.88871e+07	6.81871e+07	2.64451e+06	1.19543e+07	4.00656e+07	102906984	1.39947e+08
401 M	Positive	1.02455e+06	765719	5.22631e+06	3.7606e+06	9.90299e+06	1.27059e+06	1.57453e+06	1.31094e+07	4.27071e+06	165830	525181	2.36807e+06	112215060	9.81385e+06	1.11725e+08	43596.5	64448	418452	170176	20657.3	8.62769e+06	1.69128e+06	139555	2.54378e+06	21493	1.85617e+07	3.12007e+07	1.31223e+07	595273	1.1645e+06	1.23382e+08	802120	1.30614e+06	4.65359e+06	1.52425e+07	3.03318e+06	1.88693e+08	3.81511e+06	3.58266e+06	1.93735e+07	51354.4	8.29945e+07	1.29122e+08	1.55577e+06	4.53045e+06	4.14547e+07	9.28807e+07	1.17753e+08
406 M	Positive	1.99712e+06	274993	6.10412e+06	3.27765e+06	3.15211e+06	1.52445e+06	1.14155e+06	9.27117e+06	3.62948e+06	71127	949360	2.16182e+06	5.96188e+07	3.111e+07	1.10252e+08	89267.7	136379	308107	500683	0	8.26347e+06	7.75064e+06	139446	3.10738e+06	6054.52	2.12739e+07	1.73068e+07	9.88705e+06	804565	314279	1.04809e+08	1.48007e+06	1.755e+06	2.05764e+06	2.32232e+07	1.79141e+06	211309521	5.03955e+06	4.81965e+06	1.44598e+07	48093.8	1.4124e+08	1.08525e+08	1.1801e+06	6.86531e+06	4.00707e+07	1.08217e+08	1.07932e+08
384 M	Positive	1.76362e+06	178288	7.14258e+06	4.18542e+06	6.12912e+06	713247	361034	9.87206e+06	3.61517e+06	318041	1.101e+06	1.51373e+06	9.58509e+07	7.09688e+07	1.13731e+08	112157	117820	198142	704045	146870	1.61538e+07	2.97643e+06	180976	3.64685e+06	150150	2.55045e+07	2.41401e+07	9.26129e+06	1.24453e+06	420030	1.25372e+08	1.9089e+06	1.25694e+06	4.45794e+06	3.12816e+07	1.44929e+06	2.01831e+08	2.16496e+06	5.10472e+06	1.14031e+07	23343.7	1.2138e+08	6.46405e+07	2.13706e+06	7.96682e+06	5.33246e+07	1.14143e+08	7.66439e+07
390 M	Positive	1.43662e+06	219095	7.65719e+06	7.13253e+06	6.50886e+06	2.71943e+06	1.40945e+06	8.48436e+06	3.1346e+06	139112	1.06748e+06	1.02061e+06	5.74518e+07	2.44771e+07	9.43359e+07	58461.8	97626.6	226027	360194	93092.5	1.11381e+07	3.1881e+06	279632	3.3591e+06	116219	2.07966e+07	1.68843e+07	1.08899e+07	755131	625621	9.44054e+07	1.04889e+06	2.03e+06	3.29926e+06	2.31493e+07	1.24298e+06	2.52278e+08	8.79482e+06	2.71378e+06	7.68787e+06	67751.5	1.8824e+08	5.01287e+07	1.69209e+06	4.03999e+06	7.94397e+07	9.72327e+07	1.11261e+08
396 M	Positive	1.00125e+06	3.08276e+06	5.96865e+06	4.56159e+06	4.61921e+06	703745	361294	5.14163e+06	2.84426e+06	78401.1	683931	1.23573e+06	5.13243e+07	7.28942e+07	5.17335e+07	44928	64169.7	260085	170065	0	5.67249e+06	2.04725e+06	201190	2.56732e+06	0	2.07381e+07	1.62002e+07	9.06504e+06	517612	554504	7.9969e+07	664870	1.10779e+06	5.41567e+06	1.35047e+07	1.27348e+06	3.72664e+08	2.18886e+06	3.08999e+06	7.90793e+06	57356.3	7.86676e+07	5.6016e+07	1.5873e+06	3.24933e+06	4.92087e+07	1.21715e+08	1.77019e+08
399 M	Positive	836597	1.79729e+06	6.17599e+06	4.68577e+06	4.80462e+06	747575	1.064e+06	4.97821e+06	5.25368e+06	326385	833023	1.02393e+06	3.48604e+07	3.08759e+07	9.6111e+07	62886	34991.4	139753	326142	29649.5	2.14879e+07	2.15084e+06	173015	2.19255e+06	32616.4	3.47479e+07	1.80507e+07	1.03246e+07	629909	893624	1.71259e+08	1.3359e+06	2.04366e+06	1.67486e+07	2.13563e+07	1.94715e+06	2.36827e+08	2.2697e+06	3.09497e+06	1.2416e+07	53846.3	1.19588e+08	4.81034e+07	1.65031e+06	3.475e+06	5.18653e+07	8.27971e+07	1.36155e+08
400B- M	Positive	3.27598e+06	436615	4.16643e+06	4.80388e+06	7.10071e+06	835171	383390	1.4986e+07	4.48843e+06	168117	852812	1.18752e+06	4.19276e+07	1.66542e+08	4.76792e+07	21876.3	82036	338758	414709	61126.6	1.88285e+07	2.07515e+06	142977	1.54711e+06	136027	2.7551e+07	1.87195e+07	2.02906e+07	1.37558e+06	564660	1.79409e+08	1.31027e+06	912456	8.55236e+06	2.90844e+07	2.06928e+06	2.07849e+08	2.64956e+06	7.61308e+06	1.36382e+07	49750.6	7.58624e+07	6.34867e+07	2.26636e+06	1.15446e+07	5.32236e+07	8.35155e+07	9.77666e+07
401A- M	Positive	1.72853e+06	1.76123e+06	6.75024e+06	4.74417e+06	1.29051e+07	1.08757e+06	1.26107e+06	7.1904e+06	4.36402e+06	160550	945854	1.63702e+06	7.01855e+07	1.19801e+07	8.27377e+07	95498	75154.3	371896	256659	27316.4	9.11685e+06	2.19345e+06	194804	2.01182e+06	39523.3	1.89831e+07	3.00233e+07	1.04504e+07	1.57897e+06	1.33128e+06	9.69752e+07	1.71879e+06	1.55165e+06	6.90855e+06	3.17797e+07	1.69902e+06	2.4656e+08	3.63533e+06	3.77756e+06	1.11957e+07	237099	1.2099e+08	8.0878e+07	2.99504e+06	1.03349e+07	5.4204e+07	1.14482e+08	1.33903e+08
407 M	Positive	537682	663149	6.68153e+06	7.90021e+06	1.59458e+06	1.2413e+06	875254	8.46783e+06	3.72433e+06	211410	1.08745e+06	1.6882e+06	5.29692e+07	2.47243e+07	1.14446e+08	52619.6	50866.2	123317	843304	13428.9	1.16677e+06	3.68781e+06	353626	3.77139e+06	0	1.8031e+07	1.67956e+07	1.63307e+07	739192	556106	9.975e+07	1.53924e+06	2.04158e+06	1.03797e+07	1.45575e+07	1.42287e+06	2.7904e+08	3.60353e+06	3.86134e+06	1.37937e+07	599188	6.20009e+07	7.23499e+07	1.48621e+06	6.07545e+06	8.55077e+07	1.1156e+08	1.48987e+08
385 M	Positive	2.8076e+06	299362	7.75749e+06	7.01687e+06	5.06852e+06	1.96843e+06	1.45593e+06	1.0675e+07	5.9427e+06	745051	1.19215e+06	1.23649e+06	6.10359e+07	1.79244e+07	1.21836e+08	24854.5	158263	467371	362409	122058	1.9158e+07	3.21866e+06	286206	3.30634e+06	181625	1.92866e+07	3.10817e+07	7.76682e+06	923746	982665	9.49801e+07	1.07036e+06	2.02382e+06	6.65518e+06	3.21077e+07	1.91699e+06	2.30913e+08	6.14822e+06	3.13353e+06	6.59224e+06	52502.9	1.05175e+08	4.76432e+07	2.26229e+06	6.70382e+06	7.16253e+07	1.32086e+08	1.10618e+08
388 M	Positive	1.82502e+06	208330	5.845e+06	5.56412e+06	1.7897e+06	545938	717597	9.46379e+06	3.19854e+06	158131	753732	1.48327e+06	6.73455e+07	1.06171e+08	7.93093e+07	23623.5	63546.1	272176	321601	17220	1.11434e+07	2.56085e+06	212464	4.23094e+06	5307.52	2.95066e+07	2.06015e+07	1.19046e+07	667494	402209	1.59456e+08	823875	1.64375e+06	3.21698e+06	1.80427e+07	1.32209e+06	201279723	1.8755e+06	3.773e+06	1.43907e+07	33626.2	8.00435e+07	5.74098e+07	1.40281e+06	5.45001e+06	5.63872e+07	1.31126e+08	1.07651e+08
391 M	Positive	2.15473e+06	37761.8	6.33181e+06	2.2055e+06	2.09521e+06	812855	1.16093e+06	9.61357e+06	3.06137e+06	129144	762377	1.61805e+06	4.48811e+07	5.79451e+07	2.46732e+08	64165.7	151545	248141	454037	37547.1	1.39234e+07	1.08403e+06	100891	2.6834e+06	108248	2.56903e+07	1.44943e+07	1.05769e+07	559823	330409	1.70418e+08	1.38266e+06	1.82039e+06	4.40646e+06	2.09132e+07	1.09594e+06	2.11994e+08	2.84254e+06	4.47251e+06	8.2063e+06	55401.4	4.18154e+07	8.42972e+07	1.34896e+06	7.56508e+06	2.31477e+07	5.66835e+07	1.03591e+08
397 M	Positive	648877	1.98441e+06	5.23226e+06	5.72994e+06	2.91255e+06	815984	957906	3.95433e+06	2.89099e+06	112771	422230	877902	4.71494e+07	8.78835e+07	3.93282e+07	20656	71004.4	180734	184641	11900	8.86251e+06	3.12428e+06	295298	2.96226e+06	20956.7	1.83463e+07	1.33222e+07	7.90868e+06	573816	626725	8.08432e+07	596100	669793	5.20962e+06	9.97107e+06	1.11897e+06	3.42332e+08	2.42554e+06	2.28645e+06	8.91344e+06	32385.2	8.98168e+07	4.4696e+07	1.68983e+06	4.17957e+06	7.41229e+07	1.36474e+08	1.57017e+08
400 M	Positive	1.50416e+06	1.17282e+06	5.36604e+06	4.14657e+06	5.32145e+06	482770	306956	4.77665e+06	3.42815e+06	92395.3	829892	2.02362e+06	7.57907e+07	1.21778e+08	3.69869e+07	36672.1	50187	171373	289846	6496.24	8.55659e+06	1.79461e+06	164509	2.61674e+06	39751.5	1.72411e+07	1.52822e+07	1.31128e+07	704888	534487	1.10214e+08	1.45769e+06	695436	9.23217e+06	2.20452e+07	1.46569e+06	2.70631e+08	1.58055e+06	4.58037e+06	1.40049e+07	137123	6.96412e+07	1.01236e+08	2.03877e+06	8.6497e+06	4.55339e+07	1.05264e+08	1.45057e+08
400C- M	Positive	4.08239e+06	831866	7.71139e+06	2.65608e+06	4.56766e+06	440113	522721	6.18442e+06	4.32083e+06	74869.6	1.11487e+06	1.31307e+06	3.77424e+07	1.31193e+08	3.8276e+07	101394	62593.9	183785	737819	47327.9	7.33062e+06	1.21255e+06	78525.5	1.20983e+06	44345.4	1.78736e+07	1.59244e+07	3.62059e+07	2.83182e+06	754164	1.52253e+08	3.02045e+06	682852	4.72082e+06	6.25949e+07	2.84782e+06	2.49547e+08	1.24981e+06	1.10142e+07	1.18952e+07	341816	7.30907e+07	8.51142e+07	4.26993e+06	2.42904e+07	3.24842e+07	7.34641e+07	1.09364e+08
402 M	Positive	2.40155e+06	203284	7.94699e+06	3.09613e+06	6.63313e+06	2.08315e+06	2.00712e+06	5.85679e+06	3.52897e+06	155222	1.16847e+06	1.28804e+06	5.11389e+07	6.17427e+07	7.67476e+07	67633.9	101063	283922	350451	29825.7	1.35957e+07	1.4257e+06	119126	3.52649e+06	79505.7	2.93259e+07	1.56091e+07	6.9852e+06	916766	353290	1.41597e+08	945065	1.795e+06	4.00691e+06	2.46018e+07	1.80907e+06	2.69703e+08	6.88106e+06	2.65003e+06	8.28957e+06	60734.2	1.26704e+08	6.10863e+07	1.93031e+06	4.92061e+06	3.46526e+07	1.03444e+08	1.10067e+08
188M-M	Positive	724649	741760	7.17445e+06	3.94341e+06	3.47869e+06	1.83497e+06	413606	1.4607e+07	5.93594e+06	208930	606584	1.69073e+06	7.58498e+07	8.60715e+07	1.50264e+08	53767.8	1.54062e+07	56746.5	197842	50445.4	1.39734e+07	1.32822e+07	152110	2.7296e+06	37981.8	1.81533e+07	9.59602e+06	7.83575e+06	631125	669130	1.12745e+08	1.31602e+06	5.97166e+06	1.05448e+07	2.17527e+07	1.07458e+06	2.04173e+08	6.02757e+06	2.91739e+06	7.57824e+06	1.15511e+06	6.35614e+07	7.20516e+07	1.12655e+06	4.1785e+06	3.89663e+07	9.69746e+07	1.33337e+08
411 M	Positive	2.33563e+06	314748	5.46357e+06	1.19594e+06	7.1707e+06	1.24176e+06	1.1627e+06	2.7479e+07	2.84362e+06	146601	610541	1.41537e+06	4.64042e+07	1.56021e+08	5.0135e+07	61810.4	1.85057e+06	133568	234400	44746.1	8.97084e+06	563234	52214.5	1.56421e+06	10091.5	2.08404e+07	1.29499e+07	1.40139e+07	1.05179e+06	1.39474e+06	1.14767e+08	1.23285e+06	664072	5.3184e+06	3.56378e+07	1.87752e+06	2.88985e+08	4.11175e+06	4.87164e+06	8.39514e+06	151661	1.12558e+08	6.67926e+07	2.28327e+06	9.11505e+06	1.28115e+07	6.8449e+07	1.03741e+08
413 M	Positive	1.06706e+06	424707	6.38704e+06	3.32188e+06	2.26534e+06	523333	1.15436e+06	6.53014e+06	4.17715e+06	2.39049e+06	824638	4.31686e+06	5.60226e+07	3.35622e+07	6.97102e+07	77268.3	48678.1	249041	415752	95042.7	1.65786e+07	1.4447e+06	124559	2.93724e+06	39268.4	1.98861e+07	2.23153e+07	8.06768e+06	870971	636769	126631499	595501	1.0629e+06	6.54648e+06	2.12262e+07	1.55369e+06	2.22933e+08	1.53732e+06	3.57592e+06	1.80859e+07	61334.6	6.40667e+07	1.65749e+08	2.12414e+06	7.36877e+06	3.42736e+07	1.05891e+08	1.43017e+08
416 M	Positive	1.007e+06	488149	5.69913e+06	4.11554e+06	1.88616e+06	946833	1.22292e+06	6.41083e+06	4.3797e+06	1.09624e+06	869815	2.34901e+06	4.79807e+07	3.47355e+07	9.71832e+07	63156.8	48681.6	197132	602903	79813.2	7.91292e+06	1.81016e+06	149910	4.234e+06	72132.6	2.84796e+07	2.50873e+07	1.06813e+07	743664	502604	1.71479e+08	699686	1.67598e+06	4.12253e+06	2.55435e+07	1.67495e+06	208458811	2.76241e+06	3.11881e+06	1.23797e+07	64810	8.17629e+07	1.0376e+08	1.66645e+06	5.86791e+06	4.20077e+07	1.17779e+08	1.21157e+08
419 M	Positive	1.32922e+06	345673	5.66925e+06	2.86303e+06	2.35176e+06	622580	1.41959e+06	5.50077e+06	3.86934e+06	645677	736500	923663	5.28139e+07	2.41384e+07	1.24913e+08	41829.4	41629.1	221379	248052	68120	1.03841e+07	1.18843e+06	184411	2.89943e+06	63079.7	4.45257e+07	1.88109e+07	8.51862e+06	556585	612411	2.52718e+08	1.05927e+06	2.07064e+06	5.42877e+06	1.82679e+07	1.27617e+06	1.83918e+08	1.98162e+06	2.03335e+06	1.00961e+07	61151.8	8.02757e+07	4.35085e+07	1.52887e+06	3.3894e+06	3.80079e+07	8.10365e+07	1.29863e+08
422M	Positive	594965	77237	5.88636e+06	1.849e+06	2.51639e+06	336959	977204	7.7648e+06	3.90998e+06	189350	452635	954734	9.98116e+07	4.69453e+07	2.412e+08	58748.9	353871	97905.7	326204	30771.8	1.85194e+07	1.0811e+07	88851.9	2.02774e+06	751577	2.37022e+07	1.23883e+07	3.61877e+06	407960	411072	195384997	1.20897e+06	1.61738e+06	3.65053e+06	1.28306e+07	1.36101e+06	1.52624e+08	1.14058e+06	2.01077e+06	6.79092e+06	1.02667e+06	5.85378e+07	4.92328e+07	754240	1.98075e+06	1.8774e+07	7.7736e+07	1.00571e+08
425 M	Positive	229576	420107	3.61489e+06	883884	1.93089e+06	1.31178e+06	1.53125e+06	4.36961e+06	2.07307e+06	400502	359562	2.4355e+06	6.51403e+07	5.77169e+08	100237739	41366.1	103743	51836	428395	35881.2	1.66786e+07	441922	47149.4	1.08604e+06	18867.7	1.03357e+07	1.67403e+07	3.41975e+06	520438	827402	5.08994e+07	590444	896370	2.06339e+06	9.63979e+06	1.45566e+06	1.05541e+08	3.93507e+06	2.52277e+06	4.52336e+06	35080.8	8.72325e+07	3.25999e+07	573183	2.59772e+06	1.02352e+07	4.40769e+07	5.13944e+07
431 M	Positive	2.01765e+06	96345.3	9.15539e+06	4.67437e+06	7.28768e+06	800181	1.04618e+06	1.13921e+07	3.25759e+06	122692	909162	2.69153e+06	1.00025e+08	1.83071e+07	1.12169e+08	63174.5	87375.2	500734	396484	41697.2	3.03833e+07	2.10326e+06	190324	3.73165e+06	34178.1	1.59667e+07	2.62638e+07	9.94227e+06	795646	720033	8.00935e+07	1.46132e+06	1.29974e+06	7.578e+06	2.109e+07	1.52446e+06	2.06623e+08	2.55359e+06	4.315e+06	8.38212e+06	44260.2	6.35345e+07	1.0185e+08	2.5557e+06	4.40869e+06	5.02404e+07	1.24561e+08	1.47635e+08
434M	Positive	498625	100430	7.09492e+06	2.04072e+06	9.08651e+06	871563	1.29106e+06	9.31147e+06	4.18627e+06	791317	688046	998252	6.01546e+07	3.07986e+07	1.4341e+08	67872.7	476121	155826	337810	37927.8	1.86863e+07	1.08608e+06	76717.7	3.03064e+06	10498.1	2.11329e+07	1.87947e+07	7.83246e+06	519916	566500	1.24299e+08	519946	2.35283e+06	6.03628e+06	1.30782e+07	1.13875e+06	2.50019e+08	2.73634e+06	2.28176e+06	1.49109e+07	22871.8	9.26816e+07	4.29266e+07	989843	3.5459e+06	2.09908e+07	9.04797e+07	162088070
411A- M	Positive	1.74331e+06	286491	4.99807e+06	1.44339e+06	1.00014e+07	1.179e+06	772099	2.19912e+07	2.43298e+06	173250	641261	1.33369e+06	4.47224e+07	1.88927e+08	4.85617e+07	56458.2	1.71927e+06	104290	187512	85834.2	9.72556e+06	631871	48164.9	2.1255e+06	26897.8	2.20472e+07	12664235	1.0829e+07	1.05842e+06	1.30873e+06	1.27653e+08	1.10968e+06	517636	4.77627e+06	3.1192e+07	1.93453e+06	2.49962e+08	3.88825e+06	4.52442e+06	8.25718e+06	116219	109908906	6.55818e+07	2.06096e+06	8.37309e+06	1.58527e+07	6.83476e+07	123668050
420 M	Positive	1.35147e+06	0	2.48803e+06	1.89325e+06	1.02808e+06	570477	1.00549e+06	3.33065e+06	1.14468e+06	32788.7	948126	1.14845e+06	3.18516e+07	8.46526e+06	1.0123e+08	19412.3	175704	462914	835296	3066.01	2.23014e+06	878172	71474.8	3.18316e+06	5877.45	2.24466e+07	2.43125e+07	9.52499e+06	1.23129e+06	471991	1.73848e+08	3.31038e+06	3.41258e+06	2.32876e+06	1.41424e+07	1.36591e+06	5.6248e+07	1.94366e+06	2.90538e+06	1.48719e+08	564820	1.14727e+08	7.47831e+07	2.05908e+06	5.73672e+06	2.15993e+07	1.65763e+08	2.1764e+08
432 M	Positive	1.74895e+06	514219	5.68002e+06	4.02898e+06	5.42285e+06	947938	1.85978e+06	4.1806e+06	3.39747e+06	88104.8	1.01241e+06	997247	5.22842e+07	8.63726e+07	4.41828e+07	57008.9	78156.6	292460	239621	7740.65	8.78626e+06	1.87173e+06	132713	2.58579e+06	16268.3	1.94161e+07	1.66987e+07	7.43715e+06	714023	675098	9.74635e+07	685012	909246	3.10913e+06	2.03706e+07	1.36774e+06	2.77149e+08	3.03134e+06	2.23086e+06	7.84551e+06	39573.1	1.57633e+08	4.60215e+07	1.97223e+06	4.75728e+06	4.77318e+07	1.31505e+08	1.32331e+08
410 M	Positive	1.72364e+06	390669	9.53917e+06	5.04945e+06	3.43673e+06	1.16119e+06	634356	5.09344e+06	4.43857e+06	221294	637493	1.35116e+06	5.06098e+07	3.9344e+07	1.07065e+08	67613.3	62840.4	308927	295779	9657.01	5.21573e+06	2.12923e+06	265010	3.37849e+06	19639.1	2.7836e+07	1.9343e+07	1.10466e+07	619213	674276	1.31438e+08	1.25367e+06	630719	7.30896e+06	2.15052e+07	1.34432e+06	2.39049e+08	3.76675e+06	2.53464e+06	9.95017e+06	30388.5	147185483	5.14743e+07	1.74631e+06	6.16715e+06	6.01514e+07	1.12257e+08	1.2081e+08
412M	Positive	1.14069e+06	196213	4.5168e+06	3.31805e+06	2.9985e+06	922131	2.28095e+06	7.59037e+06	4.37447e+06	155419	804393	4.15878e+06	1.09664e+08	2.16898e+07	2.49727e+08	71440.3	469541	195283	441604	0	8.02767e+06	1.4966e+06	128553	1.62064e+06	6820.87	1.28146e+07	2.9805e+07	1.16887e+07	1.09594e+06	452928	9.71852e+07	2.86039e+06	3.06714e+06	5.20339e+06	3.17872e+07	2.12932e+06	1.46248e+08	2.87091e+06	4.3207e+06	1.29063e+07	76965.7	5.77645e+07	7.2928e+07	1.69752e+06	5.18748e+06	3.42666e+07	7.97267e+07	1.12401e+08
418 M	Positive	920016	239286	6.95751e+06	2.88786e+06	2.71423e+06	1.05368e+06	833588	6.84584e+06	3.27361e+06	300965	719144	723964	8.1116e+07	7.31179e+07	1.29089e+08	54665	104925	266453	240533	52062.9	1.45653e+07	1.27592e+06	89352.8	2.46587e+06	43326.5	2.2618e+07	2.40853e+07	8.53389e+06	855802	598230	138827623	1.1486e+06	1.50354e+06	6.04118e+06	1.47921e+07	1.43842e+06	2.7999e+08	3.85874e+06	2.82521e+06	6.59916e+06	41132.9	1.07654e+08	3.46146e+07	1.38331e+06	4.2642e+06	3.17182e+07	8.473e+07	1.13614e+08
421 M	Positive	906486	324617	5.86009e+06	1.55319e+06	4.11497e+06	633560	2.64799e+06	5.8172e+06	2.83732e+06	67252	762366	5.85691e+06	1.1991e+08	2.07356e+07	3.41044e+08	89047.5	76546.4	168248	374965	8353.24	5.17816e+06	3.01226e+06	146237	2.63672e+06	0	1.78335e+07	1.1643e+07	7.31122e+06	419934	490776	1.25922e+08	2.68039e+06	2.27427e+06	3.15556e+06	9.17064e+06	1.04975e+06	1.35189e+08	1.90679e+06	1.99915e+06	1.15267e+07	29106.1	5.79298e+07	4.66404e+07	565596	1.76702e+06	1.70561e+07	8.29857e+07	8.54188e+07
427M	Positive	600438	282457	6.97773e+06	3.46578e+06	3.66703e+06	974256	782940	6.44478e+06	4.38435e+06	2.19204e+06	1.00829e+06	1.37862e+06	1.26387e+08	1.53451e+07	1.07427e+08	45922.8	54046.4	142257	214115	117716	2.31475e+07	1.88724e+06	129385	3.31298e+06	67052.8	2.20548e+07	2.08966e+07	7.31479e+06	573389	934779	1.62367e+08	1.19203e+06	1.453e+06	6.06106e+06	1.38975e+07	1.17629e+06	187013916	2.77505e+06	2.80236e+06	1.4778e+07	42022.5	7.75514e+07	6.44542e+07	1.41179e+06	3.46978e+06	4.70303e+07	1.18308e+08	1.27367e+08
430 M	Positive	1.51875e+06	201869	4.01803e+06	3.25377e+06	2.19946e+06	627802	947782	7.48275e+06	2.81466e+06	264048	607777	2.01086e+06	4.47381e+07	1.41786e+08	1.14573e+08	46832.7	95717.2	295509	639289	13767.7	9.19067e+06	1.42895e+06	154958	3.15369e+06	18205.7	2.87673e+07	2.47447e+07	1.0871e+07	979145	359169	1.84626e+08	1.84444e+06	757026	1.46595e+06	2.20991e+07	975881	1.75719e+08	2.08842e+06	4.95432e+06	1.0548e+07	28907.5	4.3704e+07	1.00848e+08	1.62255e+06	1.19521e+07	3.53513e+07	9.58862e+07	1.05482e+08
433M	Positive	2.0821e+06	1.73216e+06	7.23512e+06	4.29364e+06	8.42415e+06	500293	1.11631e+06	4.1397e+06	3.86433e+06	69468.3	473116	1.18444e+06	7.17693e+07	3.07665e+07	9.84292e+07	73080.8	108508	941807	664046	0	5.06065e+06	2.00279e+06	223974	2.46508e+06	23634.3	1.55147e+07	3.48871e+07	1.02917e+07	723029	389698	8.47441e+07	1.29135e+06	1.67214e+06	3.38754e+06	2.05868e+07	1.75296e+06	2.80019e+08	1.64394e+06	3.81299e+06	6.53875e+06	39936.9	8.69315e+07	6.70392e+07	1.80118e+06	5.881e+06	4.88441e+07	1.13615e+08	1.52111e+08
437 M	Positive	1.05444e+06	158733	7.43322e+06	2.46599e+06	7.75119e+06	797707	666508	4.82352e+06	5.5404e+06	1.22588e+06	543298	1.52272e+06	4.953e+07	1.42571e+08	8.88186e+07	59206.7	84290.2	173214	383643	154480	1.86541e+07	1.04164e+06	63893.7	2.48182e+06	158362	2.64446e+07	2.2825e+07	1.64387e+07	976995	451091	1.55279e+08	691095	3.06197e+06	4.42028e+06	2.53802e+07	1.54031e+06	2.12011e+08	2.51123e+06	4.01605e+06	1.40409e+07	56599.1	6.68397e+07	7.23483e+07	2.53559e+06	7.5614e+06	2.69185e+07	9.63098e+07	1.13101e+08
447 M	Positive	1.35506e+06	318505	5.96805e+06	5.07448e+06	3.10729e+06	562276	1.12881e+06	4.34657e+06	2.74737e+06	647660	690177	2.90175e+06	9.26396e+07	1.9259e+07	8.25767e+07	45677	76034.3	515849	545052	103248	1.3598e+07	2.15844e+06	200813	4.08424e+06	152311	1.46757e+07	4.32237e+07	9.39005e+06	903835	384588	7.3803e+07	1.62907e+06	1.70118e+06	3.65556e+06	1.99608e+07	1.80734e+06	2.0942e+08	1.72648e+06	3.27329e+06	1.30466e+07	112780	7.66863e+07	1.31645e+08	1.87855e+06	6.86315e+06	5.42963e+07	1.45511e+08	1.40933e+08
464 M	Positive	1.78793e+06	234092	5.66275e+06	5.99828e+06	5.105e+06	371589	1.89616e+06	5.12441e+06	3.30254e+06	1.40833e+06	1.09736e+06	3.3439e+06	5.64477e+07	1.91464e+07	7.15566e+07	50583.8	47948.2	474385	1.00711e+06	115729	3.88367e+06	2.64444e+06	234654	2.84163e+06	104719	2.19383e+07	4.15701e+07	1.16185e+07	1.15585e+06	400287	1.29428e+08	2.40333e+06	2.62784e+06	6.7133e+06	3.25341e+07	2.08944e+06	2.05186e+08	1.09832e+06	5.66971e+06	9.30306e+06	70289.9	4.8302e+07	1.43707e+08	2.2036e+06	1.03831e+07	6.49453e+07	1.19671e+08	1.36128e+08
439 M	Positive	469979	322966	2.88264e+06	903806	3.97145e+06	1.87947e+06	989808	6.37589e+06	2.79087e+06	487620	421058	4.53202e+06	6.53066e+07	1.61292e+07	6.51782e+08	50827	7.29628e+06	56601.6	274078	19744.3	5.56414e+06	1.12357e+07	48672.9	968531	0	4.88288e+06	9.0769e+06	2.14432e+06	389764	221639	4.40853e+07	2.12512e+06	2.10842e+06	891746	1.12987e+07	529766	7.64084e+07	5.62078e+06	1.17411e+06	6.25839e+06	82662.1	5.01755e+07	5.15466e+07	656114	1.5169e+06	1.02306e+07	5.01932e+07	4.0483e+07
462 M	Positive	2.62777e+06	496479	6.67588e+06	7.27658e+06	9.20062e+06	1.04219e+06	1.41552e+06	6.88742e+06	5.3809e+06	1.16326e+06	713063	1.03559e+06	4.73676e+07	3.32623e+07	9.55014e+07	61676.8	55746	456251	406781	153423	1.76298e+07	3.34492e+06	315243	2.15241e+06	158046	2.13087e+07	2.69691e+07	7.92694e+06	1.22888e+06	626225	1.35164e+08	916311	3.25456e+06	6.1681e+06	2.44649e+07	1.45089e+06	2.36365e+08	3.28867e+06	2.46207e+06	7.01864e+06	37546	105044345	5.42269e+07	1.78718e+06	4.91451e+06	8.50233e+07	113614744	1.12042e+08
465 M	Positive	1.36858e+06	1.07149e+06	6.54004e+06	4.35741e+06	3.96332e+06	1.05481e+06	1.51345e+06	5.08157e+06	3.0994e+06	286613	528840	2.30842e+06	7.70861e+07	5.48192e+07	1.87776e+08	101825	52342.1	228550	341435	75480.6	1.45163e+07	1.96243e+06	172815	2.81091e+06	138959	2.70384e+07	2.04468e+07	6.80575e+06	535132	564586	1.44567e+08	2.09992e+06	2.18747e+06	3.53292e+06	1.54752e+07	1.2304e+06	1.88783e+08	3.52046e+06	3.50235e+06	9.62275e+06	88180	6.99579e+07	5.616e+07	869423	2.76915e+06	4.4404e+07	7.41013e+07	126777418
446M	Positive	2.34104e+06	324696	6.0625e+06	3.86038e+06	9.44856e+06	1.40393e+06	1.36554e+06	7.06545e+06	3.03811e+06	272013	954460	717788	3.48411e+07	2.57415e+07	2.1133e+08	33841.4	202794	193626	178257	133528	3.67652e+07	1.89747e+06	156921	1.18667e+06	382713	1.48862e+07	1.53338e+07	7.05392e+06	561731	1.18502e+06	8.02268e+07	1.25741e+06	1.56209e+06	5.82e+06	1.99284e+07	1.1375e+06	2.94162e+08	4.56887e+06	2.02452e+06	5.50546e+06	37329.8	1.17348e+08	3.78087e+07	1.30129e+06	2.22316e+06	4.07899e+07	5.10964e+07	1.41238e+08
449 M	Positive	826142	313128	6.57189e+06	4.61543e+06	5.47531e+06	1.30882e+06	1.39386e+06	4.50193e+06	2.59756e+06	379608	606504	571623	5.21806e+07	3.91592e+07	7.99583e+07	51463	57898.6	173682	315051	67394.3	1.40884e+07	2.11057e+06	194072	3.45967e+06	106759	2.41399e+07	2.45289e+07	1.29732e+07	1.04358e+06	629270	1.48054e+08	877287	2.58109e+06	4.68001e+06	1.94838e+07	1.46487e+06	264633578	4.40128e+06	2.9852e+06	8.75811e+06	41554.7	1.12544e+08	3.58387e+07	2.19017e+06	5.76517e+06	5.34301e+07	1.12479e+08	1.37219e+08
463 M	Positive	1.98469e+06	278199	6.56138e+06	5.89417e+06	7.22199e+06	605934	636677	5.05854e+06	4.06813e+06	3.66267e+06	779165	2.8154e+06	4.85913e+07	7.06955e+07	4.65854e+07	52381.5	57509.4	382461	497883	258716	1.26422e+07	3.33997e+06	280178	4.64747e+06	385882	2.64856e+07	2.34036e+07	1.23783e+07	985120	537003	1.27963e+08	1.49403e+06	1.11072e+06	3.31398e+06	2.58759e+07	2.3611e+06	2.3986e+08	1.91115e+06	3.14151e+06	9.33408e+06	138913	6.7144e+07	1.026e+08	2.18895e+06	6.12548e+06	6.61968e+07	1.43841e+08	1.2595e+08
479 M	Positive	1.40841e+06	169746	6.081e+06	3.60076e+06	9.20413e+06	499228	1.47631e+06	9.51879e+06	4.53364e+06	695738	379879	1.28018e+06	1.08138e+08	145731143	1.86071e+08	92394	67988.5	231177	897987	67211.3	3.52147e+07	1.57909e+06	114684	2.30238e+06	67243.1	1.12772e+07	2.02466e+07	1.04287e+07	633284	613328	7.28095e+07	974505	2.36574e+06	6.13318e+06	1.84257e+07	1.45254e+06	1.58093e+08	1.41037e+06	3.23607e+06	1.2026e+07	52965.4	6.22322e+07	6.21798e+07	989825	4.3393e+06	3.15574e+07	8.74924e+07	8.61973e+07
482M	Positive	1.50544e+06	350912	4.26243e+06	3.43968e+06	1.64854e+07	599115	701914	5.80445e+06	4.20308e+06	333933	1.31999e+06	1.95892e+06	6.11185e+07	7.59993e+07	4.1152e+07	44175.6	36600.1	130463	358588	69513.9	5.69954e+07	1.50689e+06	123165	2.42461e+06	45039.5	2.44619e+07	1.95033e+07	4.49738e+06	1.04e+06	1.10068e+06	1.53333e+08	1.0048e+06	1.23858e+06	5.84348e+06	2.27331e+07	1.51181e+06	2.08332e+08	2.0864e+06	2.83637e+06	8.72843e+06	92653	6.74853e+07	9.48291e+07	3.41278e+06	5.86514e+06	4.00048e+07	1.1802e+08	137250590
485M	Positive	2.23148e+06	957148	1.01124e+07	2.03378e+06	1.55146e+07	862337	1.37521e+06	4.60841e+06	9.82834e+06	367338	393825	666601	7.17525e+07	6.8209e+07	5.20832e+07	103261	68933.4	266125	388625	152000	3.25594e+07	1.10323e+06	76234.6	1.51354e+06	229060	2.50501e+07	2.10363e+07	1.09199e+07	1.39598e+06	1.07342e+06	1.59468e+08	1.04146e+06	1.91781e+06	7.78648e+06	2.65144e+07	2.18252e+06	2.18988e+08	2.56129e+06	2.55235e+06	7.78043e+06	59885.6	1.38523e+08	4.26368e+07	4.12953e+06	6.21951e+06	2.08524e+07	9.1609e+07	1.24333e+08
491 M	Positive	1.21952e+06	177095	6.20214e+06	2.61408e+06	3.24288e+06	1.53402e+06	1.24313e+06	5.00647e+06	3.14744e+06	193687	532042	978828	4.31811e+07	1.6503e+08	6.82741e+07	54765.5	98327.8	331802	238636	43945.8	9.29868e+06	1.18725e+06	110900	2.69303e+06	41676.4	2.09236e+07	2.48154e+07	8.33541e+06	564234	570723	1.10296e+08	400430	1.1688e+06	3.69968e+06	1.51413e+07	1.26104e+06	2.86943e+08	5.34908e+06	2.95446e+06	7.52023e+06	19839.2	1.06534e+08	4.23281e+07	1.14855e+06	4.37906e+06	2.98793e+07	9.23721e+07	1.2427e+08
471M	Positive	1.95933e+06	39265.7	5.12402e+06	3.17459e+06	7.96277e+06	698424	2.60874e+06	2.96521e+06	2.8409e+06	129812	520882	1.53454e+06	4.7522e+07	2.52519e+07	1.52275e+08	37914	206711	438038	572063	23663.1	9.30817e+06	1.4147e+06	114487	2.71029e+06	77051.3	2.25239e+07	2.38172e+07	1.16139e+07	911240	328354	1.28962e+08	1.29084e+06	971604	3.20092e+06	1.87291e+07	2.81513e+06	2.79264e+08	1.89063e+06	2.55137e+06	9.94455e+06	52435.2	5.27834e+07	8.79404e+07	1.56226e+06	4.88342e+06	3.44066e+07	8.37436e+07	1.25352e+08
474M	Positive	1.81847e+06	101411	5.35813e+06	4.42005e+06	5.27958e+06	687102	871586	8.62082e+06	4.17847e+06	205463	1.42618e+06	1.29177e+06	7.88352e+07	5.1509e+07	1.14228e+08	91556.8	739017	205373	476201	46159.5	3.04745e+07	2.48074e+06	164926	3.65753e+06	32683.9	1.53528e+07	1.57856e+07	1.1389e+07	604295	622362	9.8302e+07	1.62931e+06	1.31019e+06	7.48409e+06	2.01185e+07	1.63953e+06	2.45634e+08	2.15037e+06	3.49083e+06	9.55875e+06	149124	7.72526e+07	6.18614e+07	1.36519e+06	4.55153e+06	4.99381e+07	1.09742e+08	1.51105e+08
477M	Positive	2.15842e+06	315974	5.84343e+06	2.91771e+06	7.23655e+06	552209	1.66674e+06	3.94481e+06	3.79266e+06	169737	690115	1.98984e+06	2.89587e+07	1.10257e+08	9.32444e+07	53920.4	119520	261762	873773	24129.5	7.74381e+06	1.30085e+06	107885	2.79207e+06	88104.8	1.63608e+07	1.62331e+07	1.77122e+07	1.04843e+06	318813	7.88796e+07	1.47992e+06	2.07742e+06	3.12008e+06	2.62299e+07	2.04509e+06	2.66496e+08	1.74404e+06	3.64787e+06	1.37513e+07	83286.5	8.04533e+07	8.32513e+07	2.52114e+06	1.10046e+07	3.17014e+07	1.13715e+08	121690119
480M	Positive	1.08215e+06	194804	5.64516e+06	4.36794e+06	1.26028e+07	746356	1.02343e+06	7.42312e+06	4.4102e+06	115093	1.35594e+06	1.42121e+06	3.82007e+07	6.14616e+07	7.50004e+07	63096.6	113484	224892	450893	67080.7	1.49237e+07	1.93595e+06	162769	4.05639e+06	134492	2.09468e+07	2.02244e+07	1.35842e+07	952585	754039	1.22674e+08	793625	782745	7.26664e+06	1.84514e+07	1.54731e+06	2.73076e+08	2.23842e+06	4.84718e+06	1.24825e+07	65732.1	6.33258e+07	5.94554e+07	2.32569e+06	6.57535e+06	4.54496e+07	1.51174e+08	1.37553e+08
489 M	Positive	1.49384e+06	322653	8.03984e+06	4.0916e+06	4.53366e+06	1.50774e+06	1.17054e+06	4.8496e+06	4.17119e+06	313132	498512	963998	7.22752e+07	2.26464e+07	1.91384e+08	58515.4	74230.7	417812	453830	90648.8	1.82684e+07	1.9333e+06	140767	2.28476e+06	131551	2.39667e+07	2.44782e+07	8.29118e+06	698906	674447	139768969	1.47938e+06	1.66683e+06	4.04753e+06	1.24635e+07	1.46396e+06	207623603	4.72326e+06	2.98242e+06	1.23002e+07	141773	8.28174e+07	5.0084e+07	1.01402e+06	3.95375e+06	4.18512e+07	9.57144e+07	1.1976e+08
475 M	Positive	3.31751e+06	475605	9.41623e+06	4.35094e+06	8.31775e+06	1.16805e+06	2.02407e+06	3.67426e+06	3.54557e+06	152247	467111	2.09587e+06	1.07596e+08	5.71812e+07	6.52654e+07	119036	53442.9	342856	509166	98682.7	2.01044e+07	1.93043e+06	146190	2.77561e+06	172644	2.4031e+07	2.47426e+07	1.45775e+07	1.07777e+06	1.43281e+06	1.6322e+08	1.39273e+06	4.05091e+06	6.58761e+06	2.84165e+07	1.86292e+06	9.14724e+07	4.28297e+06	4.17485e+06	9.96618e+06	94768.3	7.5778e+07	1.1011e+08	1.97513e+06	5.91734e+06	4.65901e+07	116809052	1.4168e+08
478M	Positive	251621	88561.9	3.21587e+06	1.56784e+06	7.09299e+06	885241	742547	4.91122e+06	1.31461e+06	178846	1.21539e+06	1.72605e+06	8.10278e+07	1.13248e+08	2.45e+08	49838.7	136565	91365.5	630139	53541.1	169904	1.273e+07	64222.6	2.25963e+06	0	2.35329e+06	3.52201e+07	323979	869582	834046	2.70769e+07	1.66751e+06	903777	3.05321e+06	1.42653e+07	1.64557e+06	2.43397e+08	3.15181e+06	4.03928e+06	1.04965e+07	66991.8	1.28651e+08	8.20013e+07	1.45466e+06	6.13336e+06	1.77688e+07	7.90482e+07	8.08408e+07
481 M	Positive	1.54817e+06	1.19197e+06	1.22774e+07	3.91665e+06	1.86325e+07	1.23051e+06	1.40173e+06	8.06796e+06	2.89891e+06	262717	946809	4.79219e+06	5.63232e+07	5.28866e+07	4.74966e+07	74646.5	115034	511076	1.23451e+06	71543.7	2.53901e+07	1.80867e+06	139373	4.26231e+06	73181.9	2.22877e+07	2.71718e+07	1.53438e+07	310539	1.04595e+06	6.56793e+07	815224	918384	7.19535e+06	1.1957e+07	2.25211e+06	254167604	4.11229e+06	5.34332e+06	1.31809e+07	50238.1	1.14587e+08	127658346	974950	3.11586e+06	4.99731e+07	9.92233e+07	1.20386e+08
487M	Positive	1.16606e+06	36414.2	9.40671e+06	1.32158e+06	1.00841e+07	846949	964707	8.68083e+06	2.48347e+06	297598	599129	2.27453e+06	1.26323e+08	5.01294e+07	4.2625e+08	52384.6	593751	140209	514165	187240	3.9214e+07	3.17695e+07	53870	1.28422e+06	467249	2.44394e+06	1.19069e+07	6.85457e+06	413100	952273	1.95819e+07	2.56874e+06	1.45588e+06	5.81018e+06	7.84736e+06	1.05235e+06	1.33012e+08	2.89188e+06	2.78366e+06	6.57619e+06	147177	8.37962e+07	7.64258e+07	918177	2.52083e+06	1.64989e+07	4.30107e+07	70313496
510 M	Positive	1.30423e+06	154454	3.02814e+06	2.13912e+06	4.8871e+06	623311	1.84687e+06	5.79476e+06	3.35447e+06	1.89365e+06	864979	7.26591e+06	5.57357e+07	5.13257e+07	5.96802e+08	117658	474376	166212	445787	98566.2	1.23963e+07	7.24278e+06	94748	706516	64584.8	3.78751e+06	1.95041e+07	3.62997e+06	703708	404269	3.78884e+07	4.44548e+06	1.37463e+06	2.4994e+06	2.34458e+07	1.39239e+06	9.29089e+07	2.22622e+06	1.82602e+06	3.98588e+06	29859.9	6.75972e+07	5.25044e+07	1.79991e+06	3.36835e+06	2.51876e+07	3.21063e+07	4.90543e+07
516 M	Positive	1.55792e+06	1.01083e+06	6.90452e+06	2.22565e+06	5.26038e+06	578433	1.12037e+06	1.02477e+07	2.77806e+06	612941	355063	1.5667e+06	7.05578e+07	2.15313e+08	3.62071e+07	50537.8	854279	213152	266682	134759	1.55199e+07	973543	84067.3	2.62977e+06	90253.2	3.45503e+07	2.44385e+07	1.02782e+07	720557	748040	170676034	477395	639345	4.90641e+06	2.00241e+07	1.60694e+06	1.91286e+08	2.09592e+06	5.12797e+06	8.71537e+06	28944.8	8.26244e+07	7.11933e+07	1.23507e+06	4.14091e+06	2.59333e+07	8.21692e+07	9.1492e+07
520A-M	Positive	2.73463e+06	160180	7.95421e+06	5.55659e+06	1.02973e+07	1.33868e+06	725416	7.72293e+06	3.22996e+06	840623	569368	2.09786e+06	4.32853e+07	28430223	7.549e+07	48424.4	86979.5	460770	524627	108973	1.11295e+07	2.60304e+06	258821	4.70527e+06	236759	2.60095e+07	2.35809e+07	1.3341e+07	928462	470346	1.45129e+08	920840	1.3069e+06	4.3589e+06	2.03514e+07	1.82912e+06	2.25302e+08	4.66714e+06	3.32778e+06	1.30823e+07	37835	1.43952e+08	7.97418e+07	1.72534e+06	6.02654e+06	7.08128e+07	1.08724e+08	1.14969e+08
502 M	Positive	2.36854e+06	82876.6	9.49429e+06	7.08262e+06	6.46853e+06	682676	817815	6.09279e+06	3.60214e+06	189549	1.10374e+06	2.7041e+06	7.9996e+07	1.42011e+08	2.93384e+07	69615.8	93889.2	228789	179485	54980	1.48733e+07	3.20457e+06	287898	3.67332e+06	77162.5	2.1932e+07	1.75807e+07	1.62584e+07	882576	576112	119845456	835040	822561	2.34369e+06	1.83114e+07	2.22096e+06	1.67144e+08	2.72758e+06	2.02716e+06	7.23083e+06	50880.2	1.02459e+08	9.66084e+07	1.65756e+06	3.80934e+06	8.4372e+07	9.76378e+07	1.30759e+08
511 M	Positive	949131	6913.82	4.74867e+06	1.75164e+06	4.09738e+06	302511	1.06405e+06	5.76449e+06	1.24379e+06	407536	508859	782663	2.31853e+07	340459323	93942705	25528.2	43053.9	84093.7	577096	95566.4	1.13982e+07	829009	78711.4	3.28202e+06	112453	1.23741e+07	6.99771e+06	9.74561e+06	197640	272072	7.96498e+07	2.01425e+06	909262	1.74593e+06	9.97933e+06	782172	2.27362e+08	1.08394e+06	3.07864e+06	8.03446e+06	12085.5	1.25746e+08	3.38511e+07	267999	1.25036e+06	2.19362e+07	6.85015e+07	1.08573e+08
521 M	Positive	2.20082e+06	88592.1	1.30006e+07	1.17579e+06	9.29854e+06	1.61297e+06	1.02202e+06	8.45115e+06	4.57082e+06	359192	452880	755305	7.72999e+07	1.33379e+08	3.64735e+07	73211.5	103656	396000	156874	62043	1.48664e+07	694357	80725.7	1.96649e+06	85147.3	2.72454e+07	2.09675e+07	1.49522e+07	618495	637375	1.35012e+08	443768	830104	1.45266e+06	1.38765e+07	1.75079e+06	250145560	5.48943e+06	2.55892e+06	1.0025e+07	71642.8	1.83213e+08	2.57507e+07	1.13356e+06	3.1165e+06	1.50259e+07	5.48174e+07	1.28839e+08
509 M	Positive	2.73387e+06	187950	7.69059e+06	5.86475e+06	1.26615e+07	601021	786081	6.16205e+06	3.10291e+06	916206	788683	3.63499e+06	6.75537e+07	2.7459e+07	7.95879e+07	57447.8	48160.2	501733	1.19747e+06	142366	8.40859e+06	2.46163e+06	260641	4.54666e+06	193984	2.8876e+07	2.35452e+07	2.22504e+07	740310	517684	1.39607e+08	1.0412e+06	558180	2.63129e+06	1.79002e+07	2.65209e+06	1.80638e+08	1.62264e+06	4.20377e+06	1.77009e+07	105854	9.35838e+07	1.2949e+08	1.40912e+06	5.31794e+06	5.94017e+07	9.67027e+07	1.47931e+08
520 M	Positive	3.03016e+06	233337	7.65585e+06	4.89746e+06	9.25607e+06	861522	896582	6.38153e+06	3.95324e+06	1.08009e+06	795309	1.48881e+06	5.12875e+07	2.9273e+07	9.0263e+07	51187.7	59757.1	666537	400037	402219	2.1095e+07	2.04714e+06	196855	3.49516e+06	727848	2.3324e+07	2.89437e+07	1.0102e+07	1.12417e+06	768056	1.45017e+08	938339	1.48423e+06	6.54701e+06	2.52185e+07	1.82988e+06	2.17547e+08	3.02688e+06	3.21046e+06	9.09974e+06	57527.7	1.3343e+08	6.34267e+07	2.26168e+06	6.60718e+06	6.24173e+07	1.19091e+08	1.12562e+08
526 M	Positive	665140	191835	6331450	4.42973e+06	6.68738e+06	1.08244e+06	986028	7.20479e+06	2.47047e+06	637688	971781	1.15508e+06	6.59999e+07	2.0777e+07	9.97357e+07	32879	69766.6	194905	240408	39586.7	9.69927e+06	2.00625e+06	201812	2.65521e+06	58915.6	2.91238e+07	2.81119e+07	7.93026e+06	826793	573558	1.53816e+08	737719	1.7154e+06	5.93337e+06	1.9095e+07	1.37144e+06	2.82022e+08	3.79405e+06	2.98674e+06	7.83458e+06	25136.4	9.80806e+07	5.81454e+07	1.47243e+06	4.90823e+06	5.19545e+07	8.21833e+07	1.28065e+08
535 M	Positive	3.19205e+06	88186.2	7.56059e+06	4.67896e+06	9.86951e+06	726980	1.07035e+06	6.279e+06	3.37992e+06	368555	776988	4.86121e+06	5.78099e+07	1.77068e+07	7.69484e+07	55135.7	63989	480526	739049	20921.1	9.11477e+06	1.94538e+06	166272	4.42481e+06	22116.5	2.13933e+07	3.01644e+07	1.31891e+07	760939	428073	1.02641e+08	1.60811e+06	953254	3.92512e+06	30114533	1.87361e+06	2.33326e+08	2.54656e+06	2.28933e+06	6.28737e+06	61724.4	4.78952e+07	1.70588e+08	1.24191e+06	5.86337e+06	5.36623e+07	1.02523e+08	1.5349e+08
538 M	Positive	1.7176e+06	177504	4.73136e+06	5.10393e+06	6.80955e+06	836323	691591	5.48823e+06	1.86174e+06	178614	870215	2.25457e+06	6.09643e+07	3.56114e+07	9.99992e+07	30285.3	50604.2	432489	272716	93557.9	1.04306e+07	2.3432e+06	220922	4.78404e+06	76608	2.52702e+07	2.48529e+07	2.80291e+06	596663	449017	1.2772e+08	986757	1.14677e+06	5.67428e+06	1.34084e+07	1.17211e+06	2.48153e+08	2.66866e+06	2.9859e+06	6.83993e+06	82643.8	1.09575e+08	8.71072e+07	1.30811e+06	4.90004e+06	7.77686e+07	1.11233e+08	132999058
527 M	Positive	2.34752e+06	88622.7	6.41072e+06	5.72958e+06	6.82015e+06	587664	1.20262e+06	6.69886e+06	2.71539e+06	203700	963181	2.22381e+06	5.17272e+07	3.60732e+07	7.31257e+07	49964.8	87796.5	521751	484700	65134.9	8.69939e+06	2.47055e+06	204607	4.49108e+06	117358	2.19811e+07	2.41993e+07	1.55967e+07	846402	627104	1.19858e+08	988541	1.30566e+06	3.35116e+06	1.54758e+07	2.13078e+06	2.32625e+08	2.0627e+06	4.97929e+06	1.43117e+07	64602.1	8.58232e+07	8.22337e+07	1.3894e+06	6.94857e+06	6.98794e+07	1.20055e+08	1.59289e+08
536 M	Positive	1.50772e+06	90802.5	1.07027e+07	3.90897e+06	1.9811e+07	1.05289e+06	1.68234e+06	7.40482e+06	3.73243e+06	376062	775700	1.77716e+06	9.56279e+07	7.22663e+07	1.91142e+08	88705.8	158820	215706	656263	55900.7	1.95045e+07	1.71311e+06	144153	1.72412e+06	79521.2	2.12959e+07	2.3497e+07	2.06199e+07	376519	636161	1.49726e+08	3.67698e+06	2.45935e+06	2.44246e+06	1.80312e+07	2.17811e+06	1.2428e+08	3.75483e+06	3.40518e+06	6.93032e+06	68676.3	8.15389e+07	7.16428e+07	992564	5.67712e+06	4.65762e+07	5.16555e+07	9.47829e+07
547 M	Positive	3.60284e+06	579725	8.96723e+06	3.50044e+06	1.03088e+07	884398	766475	4.62825e+06	3.7927e+06	171729	644106	1.445e+06	5.04018e+07	1.72214e+07	8.84718e+07	49328.7	79938.5	525949	373579	35504.6	6.77991e+06	1.7807e+06	156421	2.58742e+06	46705.4	2.88393e+07	3.03737e+07	8.90881e+06	1.14429e+06	320936	1.62974e+08	956249	2.85261e+06	1.89251e+06	3.18847e+07	2.09041e+06	1.97799e+08	2.93343e+06	3.1663e+06	9.60339e+06	37676.7	2.36379e+08	5.8164e+07	2.83263e+06	5.38588e+06	4.30669e+07	8.09591e+07	102315174
528 M	Positive	1.36569e+06	173189	5.7391e+06	3.2432e+06	4.67623e+06	1.51231e+06	1.27777e+06	9.56899e+06	3.01614e+06	90210.9	815349	1.6998e+06	6.32199e+07	1.23587e+07	1.51532e+08	53689	68690.9	245298	211588	68176.5	1.01538e+07	1.47116e+06	122878	2.65657e+06	96986.3	32647033	1.53551e+07	8.33439e+06	559344	459629	1.66426e+08	1.20425e+06	2.05512e+06	3.83033e+06	1.60502e+07	1.50695e+06	2.12484e+08	4.51865e+06	2.80166e+06	8.60959e+06	36016.9	126879749	7.65441e+07	1.42253e+06	5.61152e+06	2.9749e+07	6.20793e+07	1.44185e+08
531 M	Positive	2.46112e+06	75813.6	6.70143e+06	6.0097e+06	7.97239e+06	418777	663592	5.42198e+06	2.07092e+06	801227	669742	6.0877e+06	4.60105e+07	4.12884e+07	4.77352e+07	55025.6	42422.8	501379	777228	111701	9.53385e+06	2.70512e+06	193313	3.95257e+06	91445.9	2.34601e+07	2.30112e+07	1.66435e+07	500873	664574	1.22927e+08	860959	1.18774e+06	3.10779e+06	1.30969e+07	2.59775e+06	2.49082e+08	1.38684e+06	3.69411e+06	1.72741e+07	57897.6	8.22756e+07	1.86489e+08	899495	6.37048e+06	5.78619e+07	9.40799e+07	1.34881e+08
537 M	Positive	310518	413379	4.49146e+06	2.76581e+06	3.36871e+06	890201	1.42176e+06	9.64626e+06	1.64105e+06	173280	356174	514117	5.38167e+07	2.18373e+08	8.43863e+07	2.90325e+07	38615.2	102124	81150.4	76853.8	3.48845e+07	1.51766e+06	119595	1.18358e+06	67556.5	1.74387e+07	1.11006e+07	2.01599e+06	368422	861687	1.16503e+08	1.28845e+06	2.004e+06	9.19262e+06	7.22919e+06	686722	1.93919e+08	4.11267e+06	862029	2.06753e+06	74048.5	1.94177e+08	3.11942e+07	616203	1.05174e+06	3.12903e+07	4.6843e+07	8.63776e+07
547 A- M	Positive	3.13792e+06	887996	9.11935e+06	5.5681e+06	1.21591e+07	670829	690945	4.29507e+06	3.85666e+06	114472	912492	1.74192e+06	4.84407e+07	3.18567e+07	8.73984e+07	75974.4	65868.9	605747	402941	85528.1	6.25539e+06	2.25406e+06	212870	1.83103e+06	96685.9	2.21568e+07	3.1756e+07	6.59527e+06	942244	499643	1.31025e+08	861932	1.83791e+06	2.70362e+06	2.75786e+07	1.55652e+06	2.24607e+08	2.37051e+06	2.29329e+06	7.26443e+06	49914.1	1.96402e+08	7.34952e+07	2.31643e+06	5.62562e+06	5.54564e+07	8.76747e+07	1.18602e+08
553 M	Positive	1.913e+06	30783.6	7.21346e+06	4.73011e+06	6.62326e+06	510792	884901	7.4046e+06	3.5712e+06	595156	696878	2.9641e+06	8.06272e+07	8.7796e+07	7.38072e+07	55080.5	74773.6	510398	246009	32050.4	8.97714e+06	2.04282e+06	173384	2.64246e+06	49417.1	1.27335e+07	3.1797e+07	1.4174e+07	614840	428288	8.63472e+07	732367	1.23049e+06	4.37061e+06	1.96898e+07	1.98767e+06	2.29718e+08	1.88034e+06	4.25548e+06	9.11521e+06	35947.8	9.81859e+07	107593861	1.28034e+06	4.76596e+06	5.37598e+07	7.31289e+07	1.63974e+08
559 M	Positive	453542	70019.1	4.61175e+06	1.8066e+06	8.64654e+06	983166	1.15956e+06	5.19688e+06	2.04881e+06	177913	631742	1.62382e+06	5.87132e+07	2.45865e+07	1.28773e+08	31743.5	180428	185793	756650	28900.3	1.8324e+07	1.17335e+06	88213.8	3.82966e+06	30282.6	1.27632e+07	4.79576e+07	5.32104e+06	969748	583320	9.49491e+07	663598	1.34843e+06	2.00678e+06	2.56917e+07	1.93036e+06	2.03367e+08	3.06376e+06	3.90253e+06	1.23425e+07	172976	1.9289e+08	9.88827e+07	1.34067e+06	5.43596e+06	2.33819e+07	1.24809e+08	7.67041e+07
562 M	Positive	3.10543e+06	135941	9.84294e+06	2.88996e+06	5.83512e+06	1.3316e+06	2.01096e+06	9.02984e+06	4.52064e+06	532039	749683	1.61601e+06	7.10905e+07	1.70348e+07	1.02854e+08	61480.9	86228.1	398122	477672	59251.3	1.08216e+07	1.25493e+06	114727	4.26654e+06	76245.8	2.37028e+07	2.24164e+07	8.52999e+06	561175	793393	117559403	995043	1.43939e+06	4.13791e+06	1.60457e+07	1.40681e+06	2.042e+08	4.91336e+06	2.87479e+06	1.22094e+07	33105.9	1.6031e+08	7.7002e+07	1.3156e+06	3.71935e+06	3.43185e+07	9.9714e+07	1.2988e+08
573 M	Positive	2.16356e+06	30179.2	6.05791e+06	2.16729e+06	1.72425e+07	965255	1.63288e+06	7.36878e+06	3.05576e+06	273138	650053	859776	6.24833e+07	1.09541e+08	189068408	53294.6	138145	373242	632285	86497	2.76163e+07	1.28927e+06	70921.5	4.3284e+06	80230.4	2.65753e+07	2.28132e+07	9.95579e+06	603398	710785	149602803	1.17467e+06	1.48475e+06	4.49264e+06	1.92533e+07	1.35608e+06	135004894	3.39983e+06	2.55452e+06	7.09397e+06	29327.8	1.02803e+08	5.18516e+07	983071	6.28558e+06	2.641e+07	9.70908e+07	7.67226e+07
582 M	Positive	2.01399e+06	222429	6.40587e+06	961576	2.76632e+06	998314	831693	8.16626e+06	2.4939e+06	280419	709997	6.83326e+06	9.917e+07	8.28501e+07	4.24507e+08	63012.8	1.78638e+06	204826	395332	37777.1	1.37803e+07	1.47215e+06	39304.5	1.28729e+06	0	3.49399e+06	1.36702e+07	6.03738e+06	396577	682441	2.27909e+07	2.99417e+06	2.14455e+06	6.88781e+06	1.55472e+07	1.28614e+06	1.27237e+08	3.68109e+06	1.88989e+06	5.8763e+06	45193.1	7.60627e+07	9.9667e+07	1.5045e+06	2.26437e+06	1.21823e+07	4.21327e+07	8.27403e+07
571 M	Positive	3.68683e+06	106164	9.92362e+06	4.9212e+06	9.27256e+06	680372	2.42183e+06	9.07037e+06	6.66544e+06	107957	1.50283e+06	1.66999e+06	7.65783e+07	2.43555e+07	1.1836e+08	67036.9	100829	303383	772196	158335	1.68717e+07	1.94375e+06	176265	2.92939e+06	205148	2.09611e+07	2.12356e+07	1.4101e+07	1.34018e+06	582258	1.22833e+08	2.94519e+06	1.86437e+06	5.07877e+06	3.5046e+07	3.38722e+06	1.73513e+08	2.41994e+06	3.96214e+06	1.25873e+07	47404.8	9.82558e+07	7.18827e+07	1.99809e+06	6.5093e+06	5.72002e+07	1.07509e+08	1.10104e+08
574M	Positive	1.73163e+06	97572.9	7.83146e+06	4.64295e+06	4.57849e+06	1.21685e+06	561018	4.26409e+06	1.78337e+06	74400.7	671230	941189	5.09198e+07	3.94087e+07	8.20269e+07	60799.7	91470	254057	322338	23572.4	8.37013e+06	2.02633e+06	180191	3.97192e+06	57993.1	2.84737e+07	1.61508e+07	1.22004e+07	465813	324978	1.49123e+08	675901	1.15143e+06	1.67523e+06	1.69902e+07	1.21504e+06	2.04407e+08	4.57908e+06	2.44049e+06	8.95866e+06	32154.1	2.96736e+08	3.94498e+07	1.18534e+06	2.94717e+06	5.56073e+07	6.78473e+07	101037684
575M	Positive	1.45138e+06	75849.7	5.88122e+06	4.04459e+06	2.5382e+06	552761	698905	5.15166e+06	1.94191e+06	837235	703876	2.63857e+06	6.18966e+07	2.78916e+07	6.73099e+07	47439.6	57498.5	357994	732418	434392	2.08232e+07	1.84046e+06	195754	6.14526e+06	708151	1.97262e+07	1.74161e+07	1.57234e+07	385701	404654	9.61158e+07	1.01932e+06	576116	5.06164e+06	9.83961e+06	1.87263e+06	340489406	1.99085e+06	3.55893e+06	1.29894e+07	64101.4	7.19228e+07	8.27148e+07	903049	4.75174e+06	4.48086e+07	1.27382e+08	1.5512e+08
578 M	Positive	186837	19035.8	2.79158e+06	1.33285e+06	6.19357e+06	528854	427310	5.2851e+06	1.44033e+06	122321	211821	1.67567e+06	3.32714e+07	2.90027e+08	2.82588e+08	36230.4	1.26728e+06	40458.1	141589	103903	1.19984e+07	3.42542e+06	70149	1.18326e+06	84995.8	1.69954e+07	8.52092e+06	2.41071e+06	311304	309129	1.42818e+08	1.14399e+06	2.75784e+06	912712	5.42244e+06	513792	1.19004e+08	1.66607e+06	1.06987e+06	2.85632e+06	229074	1.66092e+08	2.13473e+07	399285	1.47793e+06	1.5616e+07	3.45246e+07	4.44829e+07
589B- M	Positive	1.08144e+06	20275.4	8.09422e+06	4.06554e+06	1.07274e+07	1.41721e+06	927578	9.08712e+06	2.15999e+06	634645	766752	2.19864e+06	6.23755e+07	4.14429e+07	1.37274e+08	48399.1	123607	239234	465501	66743.7	1.3195e+07	1.73204e+06	158658	5.35328e+06	50659.7	2.92476e+07	1.21364e+07	1.13558e+07	400718	428254	1.18663e+08	826573	1.16149e+06	4.86966e+06	9.94213e+06	1.51069e+06	2.27264e+08	4.75473e+06	4.08439e+06	1.35879e+07	37915.4	135387701	6.82332e+07	1.08071e+06	3.30116e+06	4.59955e+07	9.38334e+07	1.19874e+08
591M	Positive	1.59331e+06	412855	7.34263e+06	5.54169e+06	5.97419e+06	708073	643812	5.70183e+06	3.80178e+06	166211	711217	1573187	4.67151e+07	4.66941e+07	6.7976e+07	36797.4	63871.8	281635	465962	29117.9	7.61989e+06	2.64278e+06	244331	2.56318e+06	8208.03	3.16415e+07	2.04858e+07	9.84004e+06	784363	546190	180097719	1.75338e+06	2.04993e+06	4.25902e+06	2.14924e+07	1.41056e+06	2.20287e+08	2.05202e+06	3.20856e+06	6.23992e+06	110149	1.33243e+08	7.1881e+07	1.98357e+06	3.85382e+06	6.81733e+07	9.24529e+07	1.31843e+08
594 M	Positive	4.85963e+06	179662	8.53516e+06	5.63891e+06	6.07966e+06	441217	1.5863e+06	7.45826e+06	3.86733e+06	601024	1.36472e+06	1.60677e+06	7.60125e+07	5.08478e+07	9.09187e+07	56766.1	58049.3	935862	1.20368e+06	73511.8	2.15521e+07	2.48333e+06	231164	3.64549e+06	114700	8.33768e+06	4.2368e+07	1.60903e+07	1.60917e+06	693459	6.11271e+07	2.43997e+06	1.11479e+06	9.72425e+06	2.91711e+07	2.68386e+06	2.20499e+08	1.42517e+06	5.04778e+06	9.06048e+06	26912.5	6.24886e+07	1.00155e+08	2.82755e+06	1.40208e+07	6.51999e+07	1.24888e+08	1.27281e+08
597 M	Positive	1.30296e+06	285541	8.01942e+06	6.73619e+06	1.0095e+07	518780	644679	1.05673e+07	3.15727e+06	662305	825738	2.88378e+06	4.77016e+07	1.036e+08	4.91307e+07	9.42309e+07	226014	329953	618939	54624.7	1.54524e+07	2.99841e+06	249046	4.80846e+06	57650.8	6.7389e+06	3.60905e+07	1.66146e+07	1.02943e+06	471556	3.99092e+07	1.16268e+06	1.18406e+06	5.39533e+06	2.58086e+07	2.37806e+06	1.77501e+08	5.10502e+06	4.33057e+06	1.23072e+07	110492	1.08695e+08	1.0705e+08	2.48789e+06	9.46631e+06	7.96479e+07	118904998	9.96596e+07
607M	Positive	3.47096e+06	925291	5.24257e+06	5.11676e+06	3.65534e+06	496561	2.83538e+06	3.51631e+07	6.57229e+06	166034	1.21795e+06	2.27956e+06	2.85278e+07	2.88404e+07	8.60121e+07	47361.5	34715.4	570796	1.34051e+06	81782.5	1.6067e+07	2.47368e+06	185157	1.33516e+06	144876	1.01014e+07	3.98073e+07	1.06561e+07	1.71877e+06	748921	8.95592e+07	3.40044e+06	2.44006e+06	8.88482e+06	4.5415e+07	3.5388e+06	1.7685e+08	1.72583e+06	6.49316e+06	1.7105e+07	70284.5	6.41525e+07	9.94234e+07	4.05261e+06	1.10562e+07	6.67283e+07	1.01254e+08	1.35703e+08
586 M	Positive	2.42769e+06	100459	5.25089e+06	4.17425e+06	4.64439e+06	949824	1.90977e+06	1.58602e+07	2.07936e+06	193274	765019	1.79595e+06	7.06675e+07	2.94334e+07	1.27129e+08	37593	78190.7	275529	2.40707e+06	63916.9	1.78952e+07	1.8854e+06	203668	3.15393e+06	48317.5	2.62791e+07	1.56879e+07	9.54908e+06	613781	539924	1.6848e+08	3.67645e+06	2.3753e+06	3.93999e+06	1.90815e+07	1.52929e+06	1.10115e+08	3.15934e+06	3.34604e+06	3.05209e+07	68843	1.09475e+08	1.13298e+08	989808	6.12273e+06	5.32271e+07	1.22619e+08	8.2358e+07
589M	Positive	0	0	3.31467e+06	3.99863e+06	4.04322e+07	804637	395352	5.61272e+06	1.29295e+08	284144	347309	1.23424e+06	1.74204e+07	7.80373e+06	5.07056e+08	865396	93892.5	120849	200913	0	4.20585e+07	4.42174e+06	104227	1.12828e+06	72459.4	384511	9.28613e+06	815481	1.65089e+06	1.7418e+06	8.48101e+06	603416	181027	1.29367e+06	4.88159e+06	1.21422e+06	1.09333e+08	2.1922e+06	959656	9.72984e+06	223836	1.08131e+08	5.76808e+07	4.82934e+06	2.76709e+06	4.18866e+07	8.39667e+06	4.16201e+07
589C-M	Positive	1.98761e+06	118416	4.51975e+06	4.32796e+06	6.9064e+06	452297	2.77824e+06	1.11748e+07	2.37531e+06	112113	489397	2.59203e+06	3.65124e+07	4.15955e+07	1.05925e+08	32197.7	120021	433063	711499	68496.8	1.64491e+07	1.92972e+06	169729	483640	125606	1.84857e+07	2.10436e+07	9.2963e+06	421672	208671	9.80137e+07	1.17198e+06	803798	1.49486e+06	1.45695e+07	1.47096e+06	1.81345e+08	1.38444e+06	3.91832e+06	3.58626e+07	75115.3	5.17741e+07	1.13272e+08	1.22284e+06	7.14335e+06	5.34415e+07	1.26485e+08	1.08566e+08
589A-M	Positive	2.34801e+06	424083	4.71986e+06	4.06757e+06	7.71577e+06	911555	2.11395e+06	2.1012e+07	3.779e+06	1.30375e+06	692363	1.5673e+06	6.05965e+07	8.40574e+07	1.0842e+08	34484.3	71064.3	562721	438993	172184	8.42568e+06	1.79447e+06	141799	2.39013e+06	230928	1.57879e+07	3.90478e+07	8.4447e+06	1.07225e+06	340537	1.32208e+08	1.98199e+06	2.45271e+06	1.65164e+06	2.76807e+07	1.8926e+06	1.83232e+08	3.08317e+06	4.49798e+06	2.64336e+07	57558.5	6.82063e+07	8.59122e+07	2.25625e+06	8.07658e+06	4.44492e+07	1.02109e+08	1.09996e+08
596 M	Positive	673473	0	2.34818e+06	248502	3.934e+06	94646	1.06411e+06	5.81738e+06	923933	130223	270380	2.56027e+06	2.57206e+07	3.33022e+08	1.25e+08	27911.4	4.86562e+07	88030.8	92083.5	22378.2	1.41851e+07	1.86984e+06	14806.5	405857	45730.4	7.15204e+06	8.95098e+06	550465	212973	207686	6.98489e+07	781729	423794	1.78865e+06	8.08657e+06	709242	5.13015e+07	320367	2.37757e+06	7.44869e+06	47762.5	2.83361e+07	1.41057e+08	343568	1.52489e+06	2.92111e+06	1.53197e+07	2.77904e+08
615M	Positive	1.98498e+06	184424	4.9709e+06	3.79606e+06	4.4978e+06	765018	2.73194e+06	1.29926e+07	3.56822e+06	162138	425517	1.38419e+06	5.35108e+07	2.25282e+07	9.94973e+07	24140.6	23229.8	502608	478157	19677.7	1.99254e+07	1.77039e+06	168718	618366	63543.4	2.44909e+07	2.47434e+07	9.37555e+06	742325	202830	1.32668e+08	1.02459e+06	1.52759e+06	2.55062e+06	1.45046e+07	1.5521e+06	1.89398e+08	2.64598e+06	3.95554e+06	4.11062e+07	74078.4	6.09734e+07	7.17128e+07	1.15833e+06	5.33539e+06	5.12746e+07	1.52049e+08	8.44712e+07
618M	Positive	2.36127e+06	165208	4.75371e+06	4.06942e+06	4.25802e+06	227010	1.27384e+06	1.42444e+07	3.44586e+06	1.35293e+06	668360	2.64335e+06	4.78994e+07	5.20581e+07	3.1914e+07	29735.6	104070	545554	808608	86641.3	6.21331e+06	1.75362e+06	152615	1.37366e+06	138779	1.44925e+07	2.82791e+07	1.41779e+07	1.00893e+06	267305	8.97738e+07	916604	351231	1.9769e+06	1.95754e+07	2.12554e+06	275883946	647357	5.3549e+06	3.86714e+07	64495.3	4.56678e+07	9.77119e+07	1.90327e+06	9.45552e+06	5.15067e+07	1.44954e+08	1.70438e+08
621 M	Positive	1.9245e+06	356076	4.4207e+06	1.87869e+06	9.19462e+06	1.23145e+06	1.97234e+06	1.13866e+07	2.81638e+06	97968.7	877404	795388	2.3783e+07	119173913	225112340	38628.9	106898	444989	468291	16219.4	2.55276e+06	4.44048e+06	78669.9	2.19562e+06	17046.8	1.83572e+07	2.3513e+07	1.75385e+06	531715	438264	1.21765e+08	489430	1.46468e+06	2.22213e+06	1.59534e+07	1.10643e+06	159146227	3.95342e+06	3.01575e+06	2.54757e+07	41371.5	1.71201e+08	5.24247e+07	620556	3.63223e+06	2.12185e+07	8.2157e+07	6.82549e+07
624M	Positive	1.21069e+06	652031	5.40935e+06	1.3895e+06	1.1026e+07	1.57399e+06	1.25734e+06	1.19749e+07	2.53166e+06	70361.2	522594	7.35819e+06	4.03118e+07	5.72945e+07	4.70669e+08	46397.3	568403	194144	720366	80979.4	2.34133e+07	2.28249e+07	48377.3	1.35084e+06	102748	4.49723e+06	1.33588e+07	4.63623e+06	416897	316688	3.40804e+07	2.34887e+06	1.02489e+07	2.76006e+06	1.51072e+07	1.07153e+06	1.68156e+08	4.81539e+06	3.5789e+06	1.07422e+07	772297	5.67308e+07	6.65567e+07	929464	2.7083e+06	1.61232e+07	4.08172e+07	8.684e+07
627M	Positive	1.82773e+06	126270	6.24583e+06	3.43239e+06	4.3604e+06	377385	715560	1.64141e+07	2.06808e+06	85296.6	1.18403e+06	1.31811e+06	4.40993e+07	4.618e+07	4.41837e+07	23958.8	145298	391871	747371	62566.4	9.44578e+06	1.53716e+06	150255	3.74201e+06	67118.1	2.41116e+07	2.42159e+07	1.30004e+07	1.09067e+06	562819	1.39903e+08	1.10481e+06	1.18688e+06	4.03453e+06	2.09108e+07	1.53858e+06	2.65837e+08	1.23912e+06	6.23913e+06	3.77204e+07	35972.9	7.9145e+07	8.20974e+07	1.65574e+06	1.16073e+07	4.16302e+07	9.95259e+07	1.65638e+08
630 M	Positive	2.6985e+06	329822	1.15743e+07	4.50528e+06	8.39318e+06	747217	1.41368e+06	9.37112e+06	3.24078e+06	161530	792554	848679	5.11803e+07	1.40406e+08	1.08889e+08	47909.9	59249.3	433128	918700	45555.1	4.01427e+07	1.99695e+06	170459	2.18167e+06	84182	2.55296e+07	1.8372e+07	2.46932e+06	396263	839071	117236747	985287	1.74324e+06	5.03781e+06	1.19122e+07	1.12915e+06	2.10912e+08	2.59641e+06	2.43175e+06	1.5167e+07	43616.5	9.71153e+07	5.08547e+07	856751	5.966e+06	5.18718e+07	5.87328e+07	1.13904e+08
633 M	Positive	3.16252e+06	259730	6.84436e+06	6.96914e+06	7.3679e+06	574663	2.34251e+06	1.25814e+07	4.57238e+06	315030	633346	1.16986e+06	4.81858e+07	5.06827e+07	6.44319e+07	37054	143273	686620	745742	181560	1.66117e+07	3.16762e+06	312386	591891	433229	1.92736e+07	3.12052e+07	9.25483e+06	642989	380358	1.13072e+08	939319	751978	5.49156e+06	1.52487e+07	1.52791e+06	2.26461e+08	1.98471e+06	3.23407e+06	2.46172e+07	35145.4	7.06201e+07	6.27476e+07	1.6449e+06	6.90459e+06	8.91051e+07	1.14149e+08	1.04139e+08
636 M	Positive	2.84838e+06	303110	7.2973e+06	4.45184e+06	1.16124e+07	1.89466e+06	1.67089e+06	1.0615e+07	3.4619e+06	387401	587243	1.23324e+06	7.64651e+07	1.46221e+07	1.31651e+08	52070	138085	523819	206854	45145.1	1.27569e+06	1.90295e+06	166653	2.18891e+06	73444.3	2.14372e+07	2.24775e+07	3.94294e+06	651663	534771	1.22073e+08	714346	1.17555e+06	3.43492e+06	1.36247e+07	1.23389e+06	2.29865e+08	6.05e+06	2.29561e+06	1.8297e+07	46214.6	1.11544e+08	7.34728e+07	900127	3.47738e+06	5.28421e+07	8.42013e+07	1.38257e+08
616M	Positive	241668	20732.1	2.87234e+06	892767	992143	950091	1.53736e+06	1.10513e+06	1.40326e+06	55790.7	215548	424913	3.4936e+07	2.5881e+08	3.31247e+08	35307.9	59429.3	68293.9	159927	18914.5	1.10406e+07	572116	42144.8	161901	46004.4	1.64999e+07	8.32609e+06	2.15615e+06	218833	238335	2.07584e+08	1.3516e+06	1.43116e+06	1.03684e+06	3.97052e+06	717761	9.37758e+07	3.06418e+06	1.21022e+06	1.42411e+07	59404.7	4.29701e+07	2.7308e+07	299917	1.48399e+06	1.14785e+07	3.28773e+07	4.63422e+07
619M	Positive	2.67358e+06	379447	7.07585e+06	4.24504e+06	8.83513e+06	2.05187e+06	1.02736e+06	1.44149e+07	3.54603e+06	720268	641332	1.56779e+06	3.88107e+07	5.55499e+07	5.73727e+07	33348.1	93187.7	303330	484804	77024.6	4.70928e+06	1.84538e+06	161065	4.0344e+06	88274	2.48103e+07	1.3406e+07	9.46256e+06	623939	526337	1.39794e+08	776388	925162	2.57074e+06	1.83626e+07	1.23218e+06	2.50722e+08	6.70539e+06	3.20194e+06	2.51267e+07	67478.1	124371315	7.93961e+07	1.26582e+06	4.90033e+06	4.9738e+07	1.06052e+08	1.35255e+08
622 M	Positive	998302	0	2.48136e+06	1.53261e+06	3.5112e+06	733584	1.86184e+06	1.00361e+07	1.41281e+06	52230.5	544521	3.72869e+06	5.96615e+07	3.12408e+08	1.08391e+08	33779.2	36448.1	148073	243639	0	5.16218e+06	5.42741e+06	61226.1	575689	0	1.61125e+07	2.15102e+07	1.80194e+06	666370	390897	2.12488e+08	1.42691e+06	1.25864e+06	1.74801e+06	1.32998e+07	1.62007e+06	1.10331e+08	2.67089e+06	3.80347e+06	2.11515e+07	40601.5	5.75549e+07	45397080	772506	3.9694e+06	1.91059e+07	6.25529e+07	6.4764e+07
625M	Positive	2.7062e+06	615703	6.69071e+06	5.61179e+06	8.40005e+06	378934	1.76888e+06	1.74978e+07	3.74013e+06	72302.5	610759	1.54198e+06	4.2542e+07	2.93314e+07	5.98998e+07	41372.7	52701.3	511406	1.17436e+06	71356.2	7.67787e+06	2.39387e+06	230635	3.30028e+06	88037.3	2.34939e+07	2.58896e+07	1.35666e+07	769804	522136	1.35376e+08	1.25259e+06	1.16345e+06	2.62457e+06	2.10436e+07	2.02299e+06	2.36852e+08	1.06738e+06	3.7189e+06	2.58836e+07	42922	9.85461e+07	8.36383e+07	1.84377e+06	6.37518e+06	6.68584e+07	1.10107e+08	1.40531e+08
637 M	Positive	5.04786e+06	0	2.62022e+06	1.44493e+06	2.44266e+06	480033	645414	1.48866e+07	1.31961e+06	201147	400600	3.1558e+06	9.51755e+06	321991630	1.04867e+08	34098.8	2.42431e+06	379709	473337	19109.5	7.8944e+06	4.93554e+06	62606.5	1.11653e+06	41931.8	9.34896e+06	1.81534e+07	3.99702e+06	357518	129028	5.3373e+07	326462	355169	1.14161e+06	2.16388e+07	728807	2.15612e+08	1.59204e+06	1.70859e+06	4.16351e+07	113803	4.14291e+07	1.3403e+08	501484	6.946e+06	1.87765e+07	5.65807e+07	1.00727e+08
617M	Positive	2.64756e+06	674035	7.24652e+06	4.16933e+06	3.70455e+06	341482	1.94102e+06	1.80663e+07	4.8154e+06	489393	613017	3.67597e+06	5.69574e+07	2.56287e+07	8.70185e+07	37897.8	70811.6	586307	882263	64083.8	4.61663e+06	1.83898e+06	182179	615579	105825	1.76622e+07	3.44929e+07	1.29768e+07	1.12153e+06	404288	1.09587e+08	2.10971e+06	616893	4.60791e+06	2.42543e+07	1.36008e+06	148351283	1.18428e+06	2.81242e+06	2.37227e+07	42836.7	4.96465e+07	1.88109e+08	2.02122e+06	1.19456e+07	5.36632e+07	1.1027e+08	1.33966e+08
620M	Positive	1.94822e+06	1.00498e+06	4.27159e+06	3.62556e+06	3.63445e+06	499267	2.60015e+06	2.28499e+07	6.196e+06	64438.2	656784	519317	4.14471e+07	1.27138e+07	8.54393e+07	38821.3	92704.1	376413	339726	0	3.46965e+06	1.53428e+06	117268	479863	17810.1	1.58287e+07	34895007	1.29305e+07	1.67599e+06	675485	1.40156e+08	1.05516e+06	2.06732e+06	5.91648e+06	3.14928e+07	1.61328e+06	2.4773e+08	2.15408e+06	4.73185e+06	1.82736e+07	49908.1	1.01454e+08	4.54286e+07	2.94587e+06	8.73976e+06	5.43857e+07	8.75845e+07	1.22696e+08
623M	Positive	1.10266e+06	115366	7.42423e+06	4.77938e+06	7.23442e+06	540513	2.79676e+06	1.14978e+07	3.87699e+06	325215	401168	866679	6.75791e+07	2.54553e+07	9.84041e+07	45800.6	64390.8	216812	669958	125801	3.27413e+07	2.11883e+06	193718	2.20577e+06	208200	1.97097e+07	1.97051e+07	8.54835e+06	591625	481845	1.14359e+08	846206	1.00802e+06	7.20647e+06	1.35449e+07	1.35162e+06	2.0605e+08	1.80025e+06	2.55289e+06	2.42127e+07	38771.3	6.8179e+07	5.18574e+07	973652	3.91019e+06	6.31887e+07	1.15795e+08	1.23801e+08
629 M	Positive	1.51221e+06	210580	4.87493e+06	1.66518e+06	3.49736e+06	924527	2.02499e+06	8.57143e+06	2.42778e+06	75605.1	422061	944059	1.90909e+07	9.80665e+07	422142458	72230.3	240426	454864	567621	21777.2	8.52846e+06	2.14125e+06	75190.8	1.17353e+06	31509.7	1.51879e+07	2.02743e+07	2.79478e+06	506450	430136	1.19266e+08	654441	2.19713e+06	1.79643e+06	1.3529e+07	1.52488e+06	1.18325e+08	3.14416e+06	2.40424e+06	1.92074e+07	163158	7.45706e+07	5.33371e+07	397321	3.82825e+06	1.89354e+07	6.35926e+07	7.13282e+07
632 M	Positive	1.49362e+06	599927	7.18312e+06	4.60604e+06	1.36396e+07	956488	2.12595e+06	1.43045e+07	4.04491e+06	86391.9	1.07113e+06	890242	5.46072e+07	2.97149e+07	8.27947e+07	16057.5	126971	310556	205783	59483.8	1.6284e+07	2.13067e+06	187831	1.50277e+06	132634	1.64122e+07	1.97302e+07	5.98102e+06	609772	420520	8.80696e+07	829655	490316	5.70453e+06	1.82347e+07	1.28525e+06	2.44734e+08	3.23195e+06	3.03242e+06	2.63075e+07	39858	1.2315e+08	5.24008e+07	1.42131e+06	4.39105e+06	5.80323e+07	1.26767e+08	1.16172e+08
635 M	Positive	1.69413e+06	93415.1	6.15299e+06	6.44513e+06	6.3186e+06	1.09018e+06	1.15641e+06	1.18542e+07	2.59225e+06	188930	1.12608e+06	1.42131e+06	5.23001e+07	2.17756e+07	1.02463e+08	21619.8	69280.3	501266	320039	62408.6	1.30215e+07	2.92267e+06	259466	3.52877e+06	108738	1.19106e+07	2.36569e+07	5.26235e+06	555981	650465	5.94843e+07	803445	1.00801e+06	5.74297e+06	1.32536e+07	1.55547e+06	2.54298e+08	3.75978e+06	3.44993e+06	3.15978e+07	105713	129220428	5.44482e+07	987523	5.73572e+06	8.00649e+07	1.48538e+08	1.27304e+08
641 M	Positive	1.80153e+06	214518	5.99693e+06	3.64106e+06	8.09648e+06	782198	2.12333e+06	3.48411e+06	5.11445e+06	175434	828002	1.75458e+06	4.33445e+07	3.2258e+07	8.10314e+07	4.40009e+07	872967	170689	435305	40611.1	5.05942e+07	1.53614e+06	143096	837560	23494	1.31797e+07	1.12189e+07	1.98283e+06	450718	690977	6.66337e+07	661432	887127	4.58017e+06	1.07251e+07	954969	2.82181e+08	2.63927e+06	2.40123e+06	3.1236e+07	83825.6	7.58425e+07	7.21467e+07	858605	2.96107e+06	4.43826e+07	1.0417e+08	139107163
645 M	Positive	2.06177e+06	242056	6.18368e+06	4.48316e+06	1.1766e+07	314258	1.63298e+06	1.60089e+07	2.92655e+06	109182	1.00471e+06	1.5861e+06	3.06918e+07	8.0321e+07	4.43094e+07	32079.5	66688	530557	301708	6920.44	1.58724e+07	1.98207e+06	176091	720443	22430.9	1.39159e+07	2.70309e+07	9.55292e+06	438670	615458	9.02786e+07	1.13854e+06	508446	4.69539e+06	1.8427e+07	1.48412e+06	246564544	984091	4.00497e+06	2.28018e+07	26746.1	5.02469e+07	8.01607e+07	1.06084e+06	5.95011e+06	5.71719e+07	1.48665e+08	1.73397e+08
648 M	Positive	2.97463e+06	130417	5.27438e+06	2.84894e+06	9.88991e+06	683484	1.45953e+06	1.70322e+07	3.70879e+06	60356.2	869381	1.80968e+06	5.50991e+07	1.63973e+08	5.84017e+07	27270.2	34156.7	368357	388589	0	5.02882e+06	1.3239e+06	120873	1.22337e+06	0	2.13971e+07	1.80841e+07	1.18425e+07	749713	330798	1.21216e+08	2.02409e+06	850419	4.47912e+06	2.1009e+07	1.69903e+06	1.78852e+08	2.51213e+06	4.38384e+06	1.91199e+07	82554.4	7.1495e+07	9.85544e+07	1.45355e+06	1.04625e+07	3.60203e+07	9.7506e+07	127729111
650 M	Positive	2.39931e+06	1.0077e+06	7.69176e+06	5.83725e+06	4.54223e+06	507045	577338	1.25423e+07	2.79227e+06	75888.9	1.10166e+06	3.02574e+06	2.00367e+07	5.47556e+07	5.22055e+07	21254.3	180687	724106	870963	36243.5	1.00727e+07	2.54741e+06	292698	3.82418e+06	91109.2	1.22281e+07	2.75807e+07	1.08315e+07	591349	482348	5.85613e+07	1.90572e+06	749581	5.37032e+06	1.51199e+07	1.42306e+06	2.74792e+08	1.64932e+06	4.95673e+06	3.31852e+07	127058	7.03444e+07	1.48566e+08	1.49526e+06	8.30959e+06	7.04824e+07	1.05708e+08	1.84818e+08
659 M	Positive	4.18357e+06	236979	8.8678e+06	3.18539e+06	9.82964e+06	1.22876e+06	3.37123e+06	2.59395e+07	5.43155e+06	77439.2	501628	1.68876e+06	6.42855e+07	1.60799e+07	1.47023e+08	54347	165716	305297	613759	82309.3	1.54378e+07	2.08498e+06	88006.8	2.61603e+06	212659	1.54669e+07	1.90616e+07	1.88739e+07	922522	634664	1.03188e+08	2.29457e+06	1.15835e+06	2.82432e+06	2.92774e+07	1.70913e+06	132930424	4.0182e+06	1.83876e+06	2.12864e+07	77189.7	8.63281e+07	4.9591e+07	1.37764e+06	4.38993e+06	3.77002e+07	9.0456e+07	1.73763e+08
646 M	Positive	860638	277638	7.70656e+06	2.68294e+06	6.57298e+06	796068	1.35007e+06	1.00749e+07	2.93662e+06	528556	773299	910585	5.01568e+07	1.86051e+07	1.03364e+08	27343.2	64599.4	401268	277555	156679	1.90023e+07	1.27344e+06	98418.4	2.29122e+06	165262	1.78554e+07	2.6996e+07	9.72774e+06	669773	843221	9.83949e+07	423687	1.17541e+06	7.48185e+06	11761293	1.40174e+06	2.83406e+08	2.79243e+06	3.93217e+06	2.52239e+07	32722.9	1.16197e+08	5.04815e+07	1.28066e+06	4.73974e+06	3.34887e+07	9.86162e+07	1.73955e+08
648A- M	Positive	1.9443e+06	305546	7.46665e+06	2.419e+06	6.46746e+06	1.71646e+06	1.99988e+06	2.25371e+07	4.42545e+06	150345	813248	1.65981e+06	3.7768e+07	1.47853e+08	9.42578e+07	55840.8	26756.1	188306	350655	66955.6	1.44012e+07	1.0958e+06	78797.6	471597	110277	2.06537e+07	2.24616e+07	7.96375e+06	783368	692991	1.23125e+08	1.73624e+06	1.48332e+06	6.82428e+06	2.82208e+07	2.03833e+06	1.72518e+08	5.63082e+06	3.03863e+06	1.0879e+07	79758.8	9.20444e+07	8.37347e+07	1.36274e+06	7.85777e+06	2.77875e+07	5.67599e+07	1.12253e+08
651 M	Positive	2.68168e+06	471113	8.52697e+06	5.92493e+06	5.6172e+06	596131	2.01107e+06	1.85655e+07	4.02961e+06	117426	841950	1.86994e+06	4.96684e+07	7.70702e+07	7.09034e+07	49963.1	80390.7	419669	585027	44029.5	2.22793e+07	2.65563e+06	270489	1.26676e+06	110417	2.11955e+07	2.41152e+07	9.84252e+06	500513	782304	1.0322e+08	1.60798e+06	1.04214e+06	1.06535e+07	2.05419e+07	1.61273e+06	1.79742e+08	1.88378e+06	3.42386e+06	2.65299e+07	52463.5	7.3549e+07	8.16854e+07	2.03657e+06	8.42883e+06	7.12549e+07	1.11673e+08	1.35278e+08
663 M	Positive	2.03449e+06	315498	4.73112e+06	1.82062e+06	6.79915e+06	2.00832e+06	2.07484e+06	1.15809e+07	2.99216e+06	177638	329472	789575	4.43716e+07	145279134	4.91372e+07	32258.7	70080.9	206020	224149	46137.3	1.56746e+07	888112	69460.6	1.3642e+06	61650.5	1.58512e+07	1.56993e+07	6.42424e+06	807968	649337	1.0051e+08	436047	580319	966634	1.56194e+07	1.18547e+06	2.19598e+08	6.36415e+06	1.71152e+06	1.37777e+07	88918.5	2.48332e+08	4.67071e+07	1.4871e+06	4.30801e+06	2.12993e+07	4.82214e+07	1.27831e+08
666 M	Positive	770234	379231	3.11185e+06	3.34926e+06	6.08912e+06	331231	2.11555e+06	8.73334e+06	2.12891e+06	197593	366768	1.00347e+06	5.15702e+07	1.85315e+08	7.93644e+07	31764.3	360570	102099	253126	30671.4	3.09578e+07	1.51107e+06	137855	295235	31193.4	2.00431e+07	1.30999e+07	5.57709e+06	565176	472067	1.11444e+08	459556	1.01664e+06	3.59967e+06	1.0513e+07	717848	1.92774e+08	1.02134e+06	2.51518e+06	2.76252e+07	50196.2	3.78312e+07	5.77337e+07	560951	2.80553e+06	4.29762e+07	8.88255e+07	1.13168e+08
644 M	Positive	1.91963e+06	131448	4.38494e+06	2.01156e+06	1.09653e+07	4.08438e+06	1.1118e+06	1.68667e+07	2.16164e+06	770238	856002	1.66438e+07	8.48075e+07	3.32486e+07	4.09255e+08	67601.7	419268	209824	1.95195e+06	134479	1.34021e+07	2.90332e+07	98695.6	1.69944e+06	143728	2.86808e+06	1.30852e+07	6.49897e+06	807352	362711	2.60523e+07	3.38913e+06	1.85285e+06	2.01493e+06	1.97014e+07	1.50478e+06	1.30352e+08	1.25878e+07	2.36187e+06	1.97084e+07	53462.5	1.14945e+08	4.72034e+07	775103	3.40922e+06	2.44659e+07	8.04228e+07	5.83785e+07
649 M	Positive	1.58474e+06	408726	5.93105e+06	3.79872e+06	9.55887e+06	811786	2.40478e+06	1.30108e+07	4.61563e+06	52946	948371	1.07566e+06	6.13978e+07	1.19547e+07	9.87923e+07	38988.8	104840	426124	273491	31952.2	1.90866e+07	1.61743e+06	128320	759253	35764.6	1.15177e+07	2.32655e+07	4.90068e+06	658351	641612	6.16269e+07	552841	1.15989e+06	5.39804e+06	1.57231e+07	1.29915e+06	2.58165e+08	2.59953e+06	2.68415e+06	2.69896e+07	47996.7	7.06359e+07	5.68014e+07	1.39055e+06	5.23376e+06	4.61749e+07	1.27891e+08	1.47121e+08
652 M	Positive	3.47574e+06	254174	9.04178e+06	2.89392e+06	4.59068e+06	732729	2.01657e+06	2.21324e+07	4.30726e+06	112498	892725	2.59435e+06	6.84596e+07	1.96497e+07	7.83299e+07	40736	56991.9	432957	649832	32811.3	8.6955e+06	1.30804e+06	137737	2.78683e+06	57117.9	2.55432e+07	2.7584e+07	9.03977e+06	813473	530345	1.55738e+08	2.19115e+06	1.11351e+06	4.3657e+06	2.71873e+07	1.88574e+06	1.6966e+08	2.70463e+06	3.11104e+06	1.88365e+07	84022.4	7.06963e+07	1.3585e+08	1.19984e+06	6.44459e+06	4.41757e+07	9.95822e+07	1.21639e+08
661 M	Positive	2.43027e+06	1.61721e+06	9.16894e+06	2.06479e+06	6.60343e+06	412122	2.14053e+06	2.66665e+07	5.13901e+06	98881.2	676618	1.58504e+06	6.30628e+07	3.04518e+07	8.42552e+07	41036.9	66965.1	382153	1.43458e+06	194015	2.44097e+07	928280	52679.3	1.279e+06	320203	2.40919e+07	2.81596e+07	1.23729e+07	1.11824e+06	697323	138540308	1.6285e+06	2.52545e+06	4.63444e+06	3.52204e+07	1.88895e+06	1.98314e+08	1.44516e+06	4.06159e+06	1.90261e+07	86158.2	9.53268e+07	9.51491e+07	5.05538e+06	8.16529e+06	2.56525e+07	80053356	1.22418e+08
667 M	Positive	940183	384608	4.59979e+06	1.5274e+06	7.75961e+06	408360	1.51503e+06	1.3623e+07	2.86747e+06	25435.7	662325	1.64405e+06	4.93902e+07	2.07355e+08	8.0967e+07	42402.1	923343	130363	290871	4746.6	4.11483e+07	745560	54893.2	2.18136e+06	36144.5	1.44809e+07	2.24474e+07	5.17998e+06	564327	1.29389e+06	8.07934e+07	524789	1.58318e+06	9.55345e+06	1.61475e+07	1.32093e+06	2.62714e+08	1.28743e+06	2.91944e+06	1.35522e+07	17694.2	6.80234e+07	8.58584e+07	1.52034e+06	4.26164e+06	1.74978e+07	6.79815e+07	1.00638e+08
670 M	Positive	776781	2.05883e+06	7.3495e+06	1.94338e+06	1.47527e+07	2.30422e+06	3.38662e+06	9.47138e+06	3.29285e+06	159074	334353	1.4817e+06	8.81393e+07	2.11374e+07	1.57123e+08	68839.3	279686	125404	259123	23098	4.38918e+06	933839	106922	625990	39771.5	2.01049e+07	1.17934e+07	3.51311e+06	439233	790494	7.47415e+07	845439	2.27137e+06	3.325e+06	1.11251e+07	1.16563e+06	1.32504e+08	7.98488e+06	1.68306e+06	1.79832e+07	94276.3	8.52103e+07	1.00934e+08	501286	2.16289e+06	2.65377e+07	9.23387e+07	1.42708e+08
673 M	Positive	618470	225509	5.30029e+06	3.56264e+06	4.09244e+06	1.09394e+06	1.79321e+06	1.26616e+07	3.26923e+06	736178	691468	594338	4.30181e+07	5.70201e+07	8.68855e+07	34264.9	54133.4	87977.6	301690	166160	1.15609e+07	1.61197e+06	143715	1.84038e+06	278176	2.52419e+07	1.59355e+07	9.03293e+06	638396	617181	1.44343e+08	818406	1.58081e+06	4.32633e+06	1.40751e+07	1.29046e+06	2.72999e+08	3.85996e+06	2.72884e+06	1.60067e+07	49467.3	116462019	3.48365e+07	1.44597e+06	5.04778e+06	4.14645e+07	7.3085e+07	1.64394e+08
676M	Positive	1.77435e+06	456073	6.80633e+06	3.02101e+06	8.8472e+06	1.04152e+06	698955	1.29665e+07	3.20751e+06	45046.8	412357	950259	5.45516e+07	1.48008e+07	8.58272e+07	46036.3	116635	359315	373853	42197.8	5.40454e+06	1.3624e+06	131193	2.57316e+06	78598.1	1.41476e+07	2.03452e+07	9.6354e+06	820814	595826	8.27913e+07	699388	1.15086e+06	1.50919e+06	1.64347e+07	1.57641e+06	3.60931e+08	3.22929e+06	2.60796e+06	1.45337e+07	34709.6	1.3029e+08	5.02213e+07	1.34932e+06	4.51538e+06	3.47067e+07	7.74327e+07	1.85313e+08
679 M	Positive	1.72705e+06	928485	1.02181e+07	3.15828e+06	5.62423e+06	602818	2.29849e+06	1.37655e+07	4.77429e+06	146286	710678	2.87101e+06	8.96111e+07	3.16444e+07	1.70357e+08	44079.9	394562	189847	371605	132619	3.19186e+07	2.14937e+06	140895	1.38428e+06	356351	1.22161e+07	1.18392e+07	5.27289e+06	491531	399884	6.25751e+07	2.6098e+06	2.17064e+06	5.3812e+06	1.60319e+07	1.00538e+06	2.23982e+08	2.04217e+06	3.87869e+06	1.92339e+07	45371.2	5.42271e+07	1.07084e+08	755590	4.09085e+06	3.78613e+07	8.73519e+07	100586585
682 M	Positive	2.70192e+06	13401.7	5.27174e+06	1.88172e+06	3.71399e+06	1.08705e+06	1.43219e+06	1.27268e+07	1.99487e+06	246336	575217	3.10324e+06	8.67182e+07	3.53659e+07	1.98879e+08	47722.6	286078	402529	280313	293419	4.09048e+07	873519	60113	2.25309e+06	27195.1	5.83637e+06	2.12736e+07	913173	434777	1.64387e+06	3.83933e+07	510166	1.03491e+06	4.4699e+06	1.46719e+07	1.34322e+06	222186619	3.35185e+06	2.78395e+06	1.37331e+07	56070.2	5.80748e+07	1.61281e+08	1.08776e+06	3.17259e+06	2.28257e+07	6.91453e+07	1.43312e+08
689-M	Positive	1.69311e+06	140916	7.3973e+06	3.23358e+06	6.77492e+06	1.04757e+06	2.74463e+06	1.26824e+07	2.70223e+06	148867	360171	1.86128e+06	4.26086e+07	119525096	1.17673e+08	40189.5	127842	178967	620636	71564.4	8.20201e+06	1.45722e+06	138439	3.33511e+06	138934	1.49069e+07	9.81639e+06	9.31082e+06	463606	323780	8.19881e+07	1.54048e+06	1.80484e+06	1.31909e+06	1.65468e+07	2.34804e+06	2.65105e+08	3.53677e+06	3.40402e+06	1.96988e+07	52397	6.29263e+07	8.42684e+07	950372	3.85115e+06	3.58089e+07	9.40611e+07	1.19158e+08
693M	Positive	994847	3.09422e+06	5.97085e+06	2.06871e+06	7.77746e+06	915375	1.05982e+06	9.44377e+06	3.15453e+06	225336	321203	2.42985e+07	7.17154e+07	1.35637e+07	3.73643e+08	58117.3	7.2182e+06	104416	145064	80899.9	2.54478e+07	3.3977e+06	87280.8	930957	146875	4.57482e+06	9.26037e+06	4.19638e+06	462555	681253	3.35511e+07	2.74937e+06	3.70226e+06	2.12845e+06	11107146	871734	1.65765e+08	3.28256e+06	1.22798e+06	1.15836e+07	1.38232e+06	140163756	6.39332e+07	778449	1.71582e+06	2.57279e+07	4.90342e+07	9.0881e+07
696 M	Positive	102507	40247.1	4.83907e+06	1.55487e+06	4.02149e+06	588011	1.45013e+06	3.91612e+06	2.55224e+06	139287	170477	379126	5.81733e+07	3.11777e+08	2.20947e+08	63795.5	60659.3	93578.5	62434.9	73759.8	3.52192e+07	5.33807e+06	77079	438801	80094.5	3.05845e+07	7.67149e+06	2.69856e+06	200110	345939	1.75717e+08	628388	5.3692e+06	2.20389e+06	5.28346e+06	720643	1.07324e+08	2.1769e+06	1.78452e+06	8.59971e+06	506055	4.5291e+07	2.23983e+07	423120	1.58376e+06	2.00775e+07	4.83143e+07	5.96002e+07
677M	Positive	1.50404e+06	660836	6.33593e+06	7.09902e+06	5.12079e+06	176593	1.06755e+06	1.58506e+07	4.0722e+06	468214	422872	2.17403e+06	6.37981e+07	5.22209e+07	3.5765e+07	29939.7	49161.3	501917	747342	146724	1.36596e+07	3.09632e+06	270938	975958	261640	8.0257e+06	3.78909e+07	1.22757e+07	1.21112e+06	628365	4.33357e+07	1.12566e+06	679179	6.60878e+06	1.90338e+07	2.46193e+06	2.60487e+08	592288	5.79838e+06	3.72315e+07	88481.7	6.59703e+07	9.87896e+07	1.9333e+06	2.01487e+07	9.2504e+07	139770318	1.41429e+08
680 M	Positive	599796	0	4.12459e+06	1.57483e+06	1.62273e+06	664538	1.67313e+06	856307	2.17435e+06	5.69781e+06	455397	438230	9.27714e+06	9.67648e+06	6.55848e+08	46094.9	545155	139025	280917	134574	1.40284e+07	5.39273e+06	64813.2	962584	539451	1.15485e+07	9.11513e+06	2.37549e+06	246528	361581	1.3186e+08	283785	2.0124e+06	346849	3.74334e+06	940696	1.22653e+08	2.37709e+06	1.96362e+06	1.62249e+07	186714	4.7052e+07	2.612e+07	169974	1.4457e+06	1.7366e+07	3.08716e+07	4.96828e+07
683 M	Positive	516175	17963.7	4.36791e+06	1.20548e+06	4.78358e+06	1.04965e+06	1.28238e+06	7.62321e+06	2.01564e+06	512956	510727	6.38877e+06	3.81693e+07	1.75185e+07	6.90096e+08	1.74709e+07	154984	136624	531456	90528.9	1.42274e+07	1.97644e+07	61155.1	776372	160608	3.81652e+06	1.29788e+07	3.74173e+06	150220	342048	3.92024e+07	1.26657e+06	2.22948e+06	2.51127e+06	8.47075e+06	857277	8.28987e+07	3.47273e+06	2.01366e+06	5.67784e+06	569929	4.58312e+07	5.50332e+07	385088	2.25719e+06	13760245	2.71982e+07	6.303e+07
690M	Positive	3.11177e+06	568400	6.54781e+06	3.55183e+06	5.04225e+06	492106	1.93094e+06	2.03622e+07	2.67817e+06	262619	243116	3.19144e+06	4.51396e+07	7.46326e+07	8.19434e+07	27554.9	48362.2	869838	703140	183527	1.84934e+07	1.44046e+06	117261	2.25707e+06	316019	1.87018e+07	4.13051e+07	1.05132e+07	524680	451065	9.93564e+07	1.10771e+06	1.72572e+06	7.13822e+06	2.35015e+07	2.00344e+06	1.84631e+08	1.66059e+06	2.28799e+06	2.14666e+07	48886.6	6.64179e+07	1.49519e+08	1.2181e+06	5.67721e+06	4.3398e+07	1.07728e+08	1.22182e+08
696A-M	Positive	321428	1.07487e+06	1.71634e+06	1.44075e+06	5.93464e+06	452795	1.36639e+06	3.45207e+07	3.61537e+07	37706.6	873208	386608	5.41054e+07	3.50179e+08	1.3803e+08	224322	73557.9	97758.3	188970	0	1.23613e+07	3.2791e+06	176568	196236	0	9.37879e+06	1.39489e+07	6.60942e+06	2.3562e+06	1.18833e+06	1.40527e+08	3.36117e+06	7.51489e+06	7.59607e+06	4.18523e+07	3.20252e+06	6.2884e+07	1.45722e+06	5.41942e+06	5.26448e+06	677423	4.70277e+07	4.68075e+07	5.55319e+06	7.2623e+06	1.45979e+07	3.6536e+07	5.33293e+07
697 M	Positive	761010	51872.7	4.76526e+06	1.03008e+06	6.29671e+06	1.41449e+06	1.33053e+06	1.44682e+07	2.842e+06	85598.5	851329	1.01633e+06	1.0878e+08	2.88278e+08	142994082	21591.4	4.81517e+06	63653.9	211104	55120.9	1.09607e+07	3.82819e+06	36761.5	346182	81139.1	9.68915e+06	1.04047e+07	1.53695e+07	543551	390713	7.56604e+07	2.10812e+06	4.20087e+06	3.64087e+06	1.77714e+07	1.0512e+06	1.62721e+08	4.57218e+06	2.34704e+06	1.37647e+07	211870	4.00337e+07	7.77718e+07	712145	5.38113e+06	1.3358e+07	5.58906e+07	8.23252e+07
678 M	Positive	953800	231951	4.63337e+06	1.21829e+06	1.81439e+06	645486	1.34768e+06	1.34955e+07	3.51744e+06	3.57027e+06	941400	1.4276e+06	9.47128e+07	8.99558e+07	1.14011e+08	37225.4	424121	70908.6	205939	320472	1.28188e+08	632539	53088.7	1.57476e+06	673035	1.48616e+07	1.85192e+07	1.99271e+06	705601	2.06039e+06	1.10525e+08	1.00753e+06	1.65004e+06	4.14102e+06	1.6996e+07	1.28564e+06	197148121	2.08109e+06	2.37342e+06	1.81186e+07	84127.6	7.32106e+07	4.42552e+07	1.00406e+06	2.95218e+06	1.31591e+07	4.96787e+07	1.14679e+08
687 M	Positive	581330	136149	5.72392e+06	2.3771e+06	9.16042e+06	935096	916209	8.02515e+06	2.05371e+06	319569	284397	899303	4.31685e+07	3.10774e+08	4.20156e+07	22138.7	402383	55849.8	208030	86255.4	1.54228e+07	1.07221e+06	80003.2	2.35054e+06	103930	1.60084e+07	7.69236e+06	7.28239e+06	432995	243712	8.6473e+07	524886	1.30011e+06	2.58287e+06	1.1298e+07	1.10503e+06	2.56912e+08	2.94595e+06	1.79123e+06	1.05954e+07	29790	5.97119e+07	4.43012e+07	912741	3.29007e+06	3.86186e+07	5.42784e+07	1.65077e+08
696B-M	Positive	176477	29301.1	3.17116e+06	1.16212e+06	4.32214e+06	413993	752396	6.66953e+06	2.11091e+06	128854	416852	862641	5.72823e+07	3.70724e+08	2.33468e+08	95890.2	40655.3	88535.4	215232	53328.8	1.76448e+07	2.57729e+06	47100.5	1.42647e+06	61063.1	2.79168e+07	8.7014e+06	4.58588e+06	253868	306938	2.00174e+08	1.01888e+06	4.45036e+06	2.79477e+06	8.33141e+06	716768	5.93657e+07	1.11424e+06	2.1889e+06	4.66307e+06	101906	3.09227e+07	4.70756e+07	710452	2.05719e+06	1.47545e+07	4.02013e+07	4.98912e+07
698 M	Positive	209098	190203	3.59462e+06	1.20188e+06	4.08159e+06	801833	329691	9.1396e+06	2.32774e+06	210791	387936	1.01909e+06	9.65454e+07	3.41651e+08	1.62392e+08	30417.7	933875	28143.5	125882	42912.2	1.09525e+07	4.72054e+06	45258.8	2.66763e+06	121157	1.21036e+07	1.44047e+07	5.42979e+06	508256	452267	9.00285e+07	1.03485e+06	2.40267e+06	2.30029e+06	1.14807e+07	721966	1.69726e+08	2.68411e+06	1.47762e+06	1.15792e+07	216769	4.82979e+07	6.01777e+07	776010	3.3509e+06	1.37259e+07	5.78829e+07	8.38129e+07
698A-M	Positive	335119	205335	2.81301e+06	1.14091e+06	3.5439e+06	858692	578966	9.12164e+06	2.42966e+06	125550	553743	967306	6.7343e+07	4.74536e+08	1.3651e+08	30110.4	181004	59853.3	215236	26912.8	1.17238e+07	3.66173e+06	43262.8	1.72065e+06	21995.2	1.00294e+07	1.58659e+07	6.55284e+06	600126	386770	7.80719e+07	995987	2.50867e+06	2.0117e+06	1.27406e+07	1.25081e+06	1.09408e+08	3.02486e+06	2.05234e+06	1.16574e+07	183116	5.02422e+07	5.88228e+07	933280	4.14302e+06	1.26778e+07	6.48594e+07	6.12148e+07
699B-M	Positive	291308	219299	3.9793e+06	3.85011e+06	5.95848e+06	516162	420595	1.16707e+07	2.49226e+06	185109	493369	901669	4.04781e+07	1.80031e+08	7.68919e+07	22443	86676.2	81578.7	257327	68060.3	8.75735e+06	1.64738e+06	178669	3.30784e+06	64530.5	3.31459e+07	1.65169e+07	1.10961e+07	1.01774e+06	404430	200674517	1.03925e+06	987733	3.11166e+06	1.46039e+07	1.38723e+06	2.13221e+08	1.64019e+06	4.19546e+06	2.45761e+07	116443	8.39947e+07	5.52774e+07	1.78215e+06	5.89086e+06	4.29952e+07	7.14582e+07	1.03138e+08
699E- M	Positive	263151	302998	5.61132e+06	2.00787e+06	1.01083e+07	488987	523603	9.39946e+06	2.5228e+06	111885	369547	1.56148e+06	3.71495e+07	1.76635e+08	9.07293e+07	63392.3	226056	72595.8	82424.4	12180.7	5.23006e+06	1.24687e+06	93778.2	4.32976e+06	42743.3	4.36209e+07	1.25665e+07	7.82512e+06	589591	334584	2.25568e+08	648891	1.54398e+06	4.41681e+06	1.16818e+07	1.1951e+06	1.68385e+08	1.57599e+06	3.59799e+06	2.12277e+07	112029	5.58398e+07	7.04543e+07	1.4425e+06	6.26573e+06	2.54488e+07	7.84036e+07	1.33025e+08
701 M	Positive	867372	598943	4.32883e+06	5.48449e+06	7.26519e+06	890101	543733	1.59463e+07	2.39601e+06	171147	1.23934e+06	2.61155e+06	3.70413e+07	1.15436e+08	3.40851e+07	29351.6	78785.9	156741	565507	77038.6	8.34139e+06	2.413e+06	228485	2.66065e+06	81100.3	1.90088e+07	2.11875e+07	1.14524e+07	207944	807413	1.17629e+08	943789	8.10395e+06	7.45884e+06	1.99796e+07	1.97705e+06	2.61647e+08	2.90462e+06	4.93233e+06	3.22452e+07	97700.7	8.3295e+07	1.28735e+08	2.06692e+06	1.1318e+07	6.12202e+07	6.85131e+07	1.21169e+08
701C- M	Positive	649938	335143	1.59074e+06	1.61401e+06	2.71941e+06	391326	385146	8.22371e+06	1.47012e+06	65463.3	805907	932696	1.49835e+07	4.37404e+07	17708111	18771.1	43190.7	65699	282173	11091.2	4.09519e+06	731200	71587.4	996398	9080.58	8.90532e+06	7.99278e+06	1.43596e+07	168565	285169	5.5501e+07	398366	2.46643e+06	2.1601e+06	1.01907e+07	1.26645e+06	8.40223e+08	1.21003e+06	2.28421e+06	1.50428e+07	44993.6	2.88498e+07	5.51819e+07	1.02001e+06	6.6728e+06	1.67624e+07	2.5772e+07	4.986e+07
701F-M	Positive	166082	21126.6	3.15368e+06	2.39173e+06	1.36004e+06	1.26771e+06	1.50208e+06	7.73361e+06	2.58555e+06	90061.4	507362	797885	5.13389e+07	3.6498e+08	1.73668e+08	256682	341809	15017.7	176327	12404.9	1.19627e+07	5.22651e+06	76515.8	1.68155e+06	16033.4	1.33187e+07	8.90662e+06	3.60217e+06	399370	236054	1.1479e+08	2.31109e+06	4.85711e+06	1.44666e+06	1.03562e+07	1.4802e+06	0	4.15637e+06	1.6324e+06	8.61157e+06	78714.9	4.62062e+07	4.49473e+07	800679	1.91047e+06	2.08238e+07	5.53986e+07	1.90623e+08
701I-M	Positive	1.16426e+06	414453	7.10784e+06	3.72984e+06	1.89983e+06	2.6414e+06	2.73684e+06	1.00446e+07	2.90283e+06	86218.3	954265	1.13105e+06	5.11866e+07	2.46466e+08	7.64404e+07	17449.2	99280.5	191812	482338	21233.3	9.91399e+06	2.67804e+06	170697	2.87079e+06	29495.8	1.2027e+07	1.36242e+07	8.96319e+06	401745	671203	5.40276e+07	945412	771068	3.08444e+06	1.27657e+07	1.72345e+06	1.84538e+08	8.29646e+06	3.46709e+06	2.53693e+07	89545.3	1.14687e+08	6.28199e+07	1.15494e+06	5.70088e+06	4.3822e+07	7.3788e+07	1.03618e+08
701M-M	Positive	957873	322302	6.37681e+06	3.74078e+06	6.59476e+06	2.99747e+06	1.26863e+06	1.16715e+07	3.70002e+06	321520	789956	1.46776e+06	8.09464e+07	1.21682e+08	4.61249e+07	62874.4	41072.6	93748.3	160946	44532	1.01317e+07	3.77719e+06	167638	5.70185e+06	43316.8	2.51293e+07	8.59877e+06	5.92537e+06	422443	375743	1.39691e+08	969165	6.75306e+06	4.41275e+06	1.50851e+07	1.45955e+06	1.92491e+08	9.06159e+06	4.08593e+06	1.28564e+07	127330	9.55705e+07	7.62368e+07	1.0845e+06	6.80729e+06	4.51748e+07	106967783	1.31412e+08
701P- M	Positive	729528	229546	5.07003e+06	2.39966e+06	3.43776e+06	2.01582e+06	1.20177e+06	1.56884e+07	4.70931e+06	241487	742078	1.25839e+06	6.38814e+07	1.30043e+08	5.89462e+07	55162.6	202660	40484.6	223815	40301.2	1.16455e+07	1.5987e+06	77128.7	2.36829e+06	35001.6	3.67831e+07	7.45063e+06	5.33149e+06	448261	415757	2.00323e+08	1.92147e+06	5.7526e+06	5.63823e+06	19735758	1.28067e+06	2.17384e+08	6.59606e+06	2.57091e+06	5.68512e+06	55881.5	6.07287e+07	6.09217e+07	970453	4.02407e+06	2.61816e+07	79542688	1.31714e+08
701S-M	Positive	652067	519574	6.14496e+06	4.80769e+06	7.37605e+06	1.9841e+06	360594	1.48352e+07	3.34359e+06	178873	1.21497e+06	2.4287e+06	3.95431e+07	4.89254e+07	4.64425e+07	24840.8	12353.7	81006.9	474342	43903.5	1.1588e+07	2.10039e+06	198504	2.78487e+06	98628.4	2.74099e+07	1.66613e+07	1.39807e+07	317363	1.31889e+06	1.5748e+08	728933	1.62563e+07	7.26073e+06	1.79215e+07	1.31852e+06	2.1866e+08	6.38929e+06	3.28929e+06	2.43025e+07	156644	150269794	1.20178e+08	2.03805e+06	6.50495e+06	53918183	7.91731e+07	1.15157e+08
699-M	Positive	222536	160674	3.72359e+06	3.78468e+06	2.52643e+06	488034	573347	9.54508e+06	2.45064e+06	305806	1.25696e+06	940795	2.87075e+07	1.32488e+08	8.76087e+07	31732.3	54763.4	76702.8	347386	33398.7	6.88148e+06	1.64366e+06	146357	4.64554e+06	10810.4	3.17523e+07	1.41131e+07	1.53035e+07	704791	255962	1.84096e+08	791291	3.8074e+06	4.19571e+06	1.18072e+07	1.06358e+06	2.29801e+08	1.39202e+06	4.48837e+06	1.50298e+07	72317.4	5.76638e+07	5.04749e+07	1.40117e+06	5.36538e+06	4.18787e+07	1.35136e+08	1.2635e+08
699C -M	Positive	936609	187676	4.03679e+06	1.5922e+06	5.65936e+06	315119	507387	9.75238e+06	2.13967e+06	179809	639576	729528	5.21311e+07	1.78783e+08	7.55407e+07	18425.9	140545	176999	292491	73489.4	1.83562e+07	740613	54136.6	3.43968e+06	69571.9	3.28095e+07	1.49734e+07	7.49372e+06	712739	331875	2.0913e+08	812366	4.14537e+06	4.0242e+06	1.2295e+07	1.08035e+06	2.4676e+08	1.06988e+06	2.66312e+06	1.95267e+07	55973.2	6.31069e+07	4.50004e+07	1.53285e+06	5.18655e+06	1.81673e+07	6.97381e+07	1.09713e+08
701A-M	Positive	1.5196e+06	373849	4.02298e+06	4.25483e+06	7.56396e+06	853029	559848	1.69489e+07	2.72139e+06	83280.6	1.34038e+06	2.12826e+06	4.06359e+07	7.70471e+07	3.1337e+07	18394	75931.8	171616	482242	46187.1	1.27448e+07	1.83386e+06	181434	2.36428e+06	37804.6	2.05376e+07	1.71115e+07	1.49493e+07	335866	1.11023e+06	116192175	876544	8.32576e+06	6.11631e+06	2.06159e+07	2.66303e+06	3.10295e+08	2.94504e+06	5.61256e+06	2.9099e+07	121668	8.74904e+07	1.11767e+08	1.87953e+06	9.69015e+06	4.7322e+07	6.28284e+07	1.4094e+08
701D- M	Positive	631485	114321	1.80411e+06	1.97299e+06	2.45403e+06	409262	913573	5.54802e+06	1.21134e+06	22383.4	496509	886608	1.45009e+07	5.64031e+07	2.44505e+07	10488.6	54952	101177	162457	3362.6	3.83681e+06	888714	79487.2	925112	0	5.97347e+06	6.24319e+06	5.68218e+06	150754	289303	3.53943e+07	457528	5.29876e+06	1.74256e+06	7.8991e+06	1.00796e+06	8.37273e+08	1.30594e+06	1.25394e+06	9.4516e+06	40177.2	3.79175e+07	5.58935e+07	758252	3.10725e+06	2.28433e+07	2.68625e+07	5.02076e+07
701G-M	Positive	599610	49340	3.86543e+06	2.72386e+06	2.61924e+06	1.2081e+06	1.66873e+06	7.35063e+06	1.89311e+06	169625	1.00511e+06	1.27316e+06	6.13848e+07	3.3842e+08	1.07686e+08	25622.8	109065	78191.8	96852.1	38006.4	2.11724e+07	1.63045e+06	120595	2.36567e+06	3786.69	1.61852e+07	1.05184e+07	4.82043e+06	382164	399342	9.95702e+07	1.40741e+06	4.77974e+06	2.08643e+06	9.43799e+06	1.48588e+06	0	3.99283e+06	2.20216e+06	2.31549e+07	66394.9	6.14096e+07	7.6847e+07	878437	3.81301e+06	2.75755e+07	5.81552e+07	1.90887e+08
701J-M	Positive	1.42214e+06	188563	5.79192e+06	3.54549e+06	8.94634e+06	1.99907e+06	2.36468e+06	1.19467e+07	4.3456e+06	126876	861071	1.12708e+06	9.29375e+07	1.68602e+08	9.43516e+07	73656.3	55804.9	178437	666321	25267.7	7.57456e+06	1.86517e+06	142833	3.31419e+06	10101	1.76815e+07	1.30359e+07	1.05803e+07	476911	402320	8.21912e+07	816244	606463	3.53626e+06	1.56335e+07	1.99685e+06	1.54638e+08	6.0069e+06	3.80375e+06	1.26372e+07	69934.4	7.55295e+07	6.42284e+07	1.40167e+06	7.31169e+06	4.03071e+07	9.32334e+07	9.96023e+07
701N-M	Positive	608103	609017	4.86826e+06	3.7941e+06	3.28983e+06	1.69384e+06	1.37336e+06	1.20542e+07	5.11145e+06	123231	662784	1.20493e+06	6.20599e+07	1.30708e+08	4.57616e+07	61117.9	44900	116977	190169	17731	1.03787e+07	1.93666e+06	126462	3.24685e+06	18023.8	2.96017e+07	1.2915e+07	7.7981e+06	540402	388758	1.74105e+08	882266	6.36804e+06	6.71225e+06	1.50896e+07	1.23286e+06	2.06537e+08	5.72736e+06	3.64339e+06	9.3271e+06	144476	6.9269e+07	6.32893e+07	1.68068e+06	6.90724e+06	4.17235e+07	1.21126e+08	113577583
701Q-M	Positive	1.11114e+06	345015	5.73307e+06	2.6207e+06	4.47195e+06	1.99783e+06	1.38605e+06	1.56262e+07	3.77252e+06	144155	912784	1.18608e+06	5.99559e+07	1.52354e+08	4.66612e+07	41310.4	251870	85473.7	197601	52534.7	2.70792e+07	1.15492e+06	87235.6	2.3249e+06	23937	3.06058e+07	1.15402e+07	6.08626e+06	606065	427819	1.91635e+08	1.35542e+06	3.01465e+06	3.74262e+06	1.91062e+07	1.61256e+06	1.77884e+08	6.23952e+06	3.52423e+06	1.00256e+07	57536.3	6.69021e+07	6.25542e+07	1.33203e+06	4.64122e+06	2.83449e+07	7.29116e+07	1.50901e+08
701T-M	Positive	859112	269157	5.34573e+06	2.30374e+06	3.21542e+06	775946	376189	1.70403e+07	2.66951e+06	143774	1.37693e+06	3.26605e+06	7.72537e+07	3.39527e+07	3.83246e+07	46822.9	19614.7	123496	313021	20325.3	3.64123e+06	1.08667e+06	91597.2	3.49077e+06	28820.8	2.68719e+07	1.88804e+07	1.47305e+07	436472	871175	145309618	791064	1.20218e+07	7.94011e+06	1.99359e+07	1.4605e+06	2.85968e+08	2.61542e+06	4.1242e+06	2.307e+07	187606	7.67529e+07	1.3286e+08	1.56856e+06	9.25586e+06	2.47022e+07	1.02456e+08	1.31222e+08
699A-M	Positive	427626	225328	3.68879e+06	3.28033e+06	3.4954e+06	475433	530917	1.24172e+07	2.37412e+06	103388	882883	1.25771e+06	3.45744e+07	1.33482e+08	7.02799e+07	34407.9	60532.4	90636	146492	43410.9	1.24233e+07	1.43998e+06	116232	3.89172e+06	31250.3	3.60793e+07	1.5997e+07	1.25011e+07	806394	295321	2.08213e+08	807920	7.80111e+06	2.7342e+06	1.61932e+07	1.45965e+06	1.7275e+08	1.65473e+06	4.89035e+06	2.95783e+07	108512	6.47476e+07	7.57196e+07	1.44951e+06	7.77306e+06	3.42218e+07	1.10357e+08	1.38512e+08
699D - M	Positive	616601	322874	3.74344e+06	2.93557e+06	5.42761e+06	457444	604866	1.40018e+07	3.55591e+06	112297	491761	874501	3.80892e+07	1.64814e+08	7.7697e+07	42252	231637	180997	212123	65965.4	1.05382e+07	1.55666e+06	111185	3.09322e+06	56557.7	2.72447e+07	1.45126e+07	1.32516e+07	1.02864e+06	320259	2.02131e+08	866280	8.13491e+06	3.63296e+06	1.7511e+07	1.57061e+06	1.84791e+08	1.55667e+06	5.40904e+06	2.32523e+07	100751	7.67431e+07	5.99602e+07	2.19726e+06	8.90769e+06	3.76814e+07	9.16016e+07	1.11541e+08
701-B M	Positive	1.05509e+06	285662	4.36268e+06	4.85418e+06	5.09094e+06	712557	727313	1.6591e+07	3.39987e+06	214861	1.05426e+06	2.2982e+06	4.19446e+07	1.01115e+08	3.84168e+07	23100.7	51292.1	157870	597175	9293.16	1.1887e+07	2.1561e+06	191236	2.61835e+06	51620.3	2.27291e+07	1.95241e+07	1.37513e+07	372966	1.01401e+06	1.18698e+08	1.16525e+06	6.52119e+06	6.95301e+06	1.97721e+07	2.60354e+06	2.63794e+08	2.62047e+06	4.78232e+06	2.10506e+07	127693	6.46121e+07	1.1797e+08	2.20194e+06	1.18649e+07	5.71553e+07	8.45835e+07	1.38326e+08
701E-M	Positive	612938	96535.1	5.63895e+06	3.24859e+06	1.19121e+06	2.15124e+06	1.27197e+06	1.07375e+07	2.62707e+06	250263	1.38052e+06	1.80469e+06	5.85327e+07	2.43606e+08	1.93255e+08	29611.2	489561	83257.8	253580	44186.3	1.32464e+07	5.87004e+06	125938	2.0172e+06	45307.2	1.47042e+07	1.22454e+07	3.8471e+06	210864	281162	9.63533e+07	2.243e+06	1.83608e+07	2.65333e+06	1.33323e+07	1.94753e+06	0	6.63118e+06	2.02116e+06	1.56344e+07	142077	7.7242e+07	1.08366e+08	817144	3.11792e+06	3.00055e+07	3.94368e+07	1.61689e+08
2701H-M	Positive	505003	772868	4.08689e+06	3.39784e+06	5.36842e+06	1.6775e+06	3.18528e+06	1.24454e+07	3.37593e+06	247909	987055	545964	4.48404e+07	2.52034e+08	7.14382e+07	22793.6	198942	83672.2	254605	42384	1.17589e+07	1.51922e+06	144824	2.01545e+06	22152	1.01588e+07	1.5574e+07	5.40934e+06	541195	577470	6.85713e+07	1.01926e+06	991984	3.10478e+06	1.54545e+07	2.04343e+06	1.74957e+08	5.21664e+06	2.33401e+06	1.59286e+07	105471	8.27032e+07	6.30694e+07	1.5739e+06	4.21832e+06	3.86389e+07	6.49518e+07	1.28432e+08
701K-M	Positive	694031	490674	7.07416e+06	4.60838e+06	2.22298e+07	2.95222e+06	1.96846e+06	8.69081e+06	2.38927e+06	96558.8	862584	1.42257e+06	5.20788e+07	1.51325e+08	5.7413e+07	38570.8	43961.4	177079	284510	27742	7.4993e+06	2.03203e+06	210954	4.33612e+06	34956.6	2.35193e+07	1.45211e+07	1.02263e+07	266491	526760	1.05197e+08	742986	8.57866e+06	3.28909e+06	1.06049e+07	1.31683e+06	1.76644e+08	8.89105e+06	3.82238e+06	1.91797e+07	88926.4	1.08179e+08	8.54003e+07	1.33642e+06	7.38081e+06	4.89735e+07	9.19023e+07	1.24984e+08
701O-M	Positive	833348	413139	4.12991e+06	4.65095e+06	1.02161e+07	1.90221e+06	511223	1.16017e+07	2.21264e+06	249152	812755	1.71462e+06	4.92795e+07	9.30382e+07	2.61461e+07	36460.1	64072.8	67896	161057	62768.8	9.26007e+06	2.08916e+06	186302	6.28575e+06	46097.9	2.34091e+07	8.01776e+06	7.29696e+06	408903	367004	1.41977e+08	851986	6.68199e+06	4.3802e+06	1.42682e+07	1.09723e+06	2.59061e+08	5.06561e+06	4.82125e+06	1.46176e+07	130613	8.07142e+07	8.59645e+07	990449	7.722e+06	5.10999e+07	1.3072e+08	149683233
701R-M	Positive	616418	419884	6.87636e+06	2.46154e+06	4.56002e+06	858938	897975	9.4646e+06	4.64191e+06	240627	495883	696173	7.88843e+07	2.4025e+08	5.22787e+07	67547.8	338634	73142.5	214392	54686.6	1.07912e+07	1.10057e+06	93695.3	2.25083e+06	68619	3.00101e+07	9.50277e+06	6.42942e+06	569000	443536	1.80619e+08	614332	4.43983e+06	3.19383e+06	1.20883e+07	1.03205e+06	2.19907e+08	2.6547e+06	1.53437e+06	1.0404e+07	61060.2	5.7361e+07	3.63184e+07	853657	2.23712e+06	2.67592e+07	7.37806e+07	1.07028e+08
702 M	Positive	561266	321310	2.97069e+06	2.05965e+06	4.87172e+06	2.03028e+06	503724	1.78877e+07	2.62446e+06	125143	707011	1.34202e+06	1.26975e+08	1.63995e+08	1.39332e+08	25122.3	107934	60997.9	387598	76703.8	8.26503e+06	3.73735e+06	78276.6	1.33812e+06	79802.4	1.3813e+07	1.72013e+07	1.03226e+07	883297	383814	1.38568e+08	2.21937e+06	3.52664e+06	2.79446e+06	2.27707e+07	1.17595e+06	1.7636e+08	6.43685e+06	3.10686e+06	1.39454e+07	709814	6.18879e+07	8.8399e+07	1.48389e+06	6.1999e+06	2.35705e+07	5.75095e+07	9.99262e+07
703M	Positive	1.42222e+06	63911.7	2.16449e+06	1.37682e+06	2.26153e+06	1.07055e+06	409436	1.38523e+07	977420	142694	490163	1.05721e+06	4.61196e+07	2.45406e+08	2.76698e+08	14747.4	126400	131568	410049	31219.6	1.03497e+07	2.01346e+06	55429.8	1.70825e+06	47378.2	1.45734e+07	1.35286e+07	5.32377e+06	1.054e+06	256625	1.50388e+08	1.75172e+06	6.53148e+06	928514	1.7737e+07	1.20138e+06	1.16296e+08	3.14577e+06	2.81518e+06	2.47373e+07	82249.4	6.33119e+07	6.48156e+07	1.15309e+06	7.4564e+06	1.47864e+07	6.33194e+07	5.78386e+07
705 M	Positive	1.02559e+06	938842	5.33142e+06	2.90924e+06	5.30169e+06	642091	876644	1.19853e+07	2.8103e+06	912206	781442	2.42996e+06	8.16972e+07	8.43951e+07	6.32481e+07	27822.3	66283.8	280040	600930	227099	2.69831e+07	1.27812e+06	153667	3.21682e+06	390002	1.72543e+07	2.15536e+07	8.93366e+06	843227	547306	1.0193e+08	1.63823e+06	874880	1.5219e+07	1.07713e+07	1.37315e+06	2.634e+08	2.25719e+06	4.26889e+06	1.80185e+07	90479.4	7.25331e+07	1.27564e+08	1.4381e+06	6.32369e+06	3.36907e+07	9.37487e+07	1.28708e+08
707A-M	Positive	1.12577e+06	418428	6.31288e+06	2.14965e+06	7.28081e+06	1.7758e+06	691701	2.01001e+07	4.25109e+06	696577	666768	1.63342e+06	146673246	8.49546e+07	1.72859e+08	74574.7	1.96083e+06	95343.7	206195	111416	1.2003e+07	1.55706e+07	74537.3	1.68919e+06	133166	1.91238e+07	1.42686e+07	1.00303e+07	811122	774492	143908356	1.8583e+06	1.35609e+07	5.12121e+06	2.36882e+07	1.37525e+06	1.39963e+08	6.00153e+06	4.03164e+06	8.88882e+06	757327	5.71243e+07	8.24143e+07	1.16738e+06	5.01923e+06	2.40396e+07	5.6864e+07	8.98733e+07
707D- M	Positive	573369	1.02055e+06	4.4318e+06	2.01525e+06	5.43569e+06	1.31782e+06	373571	1.27806e+07	2.78014e+06	459653	500608	1.21323e+06	1.21203e+08	1.31913e+08	1.24362e+08	55076.6	1.0082e+06	62842	214517	81939.9	9.57961e+06	1.32307e+07	96426.8	4.48059e+06	53491.7	1.68556e+07	1.14778e+07	4.94214e+06	601110	599628	9.45066e+07	914481	7.49715e+06	3.23503e+06	1.63532e+07	1.33977e+06	2.27832e+08	4.07074e+06	3.60966e+06	7.19615e+06	771821	5.03592e+07	5.50637e+07	759076	3.5935e+06	2.3671e+07	1.17678e+08	1.22725e+08
707G-M	Positive	949898	875579	6.33609e+06	2.59583e+06	8.89018e+06	2.1926e+06	202554	1.35959e+07	2.45801e+06	152413	387857	1.4041e+06	9.93406e+07	1.64662e+08	8.99406e+07	36991.2	1.16263e+06	107738	184208	58616.5	1.08852e+07	2.30998e+07	99002.6	3.31426e+06	45000.8	1.62614e+07	1.2735e+07	8.48154e+06	582249	628635	8.28116e+07	1.61715e+06	6.8989e+06	3.6969e+06	1.64166e+07	1.00806e+06	2.12937e+08	6.80199e+06	2.91063e+06	1.3536e+07	830089	1.15467e+08	7.39239e+07	814524	4.40978e+06	2.96199e+07	7.77501e+07	1.09959e+08
707J-M	Positive	543868	979380	4.884e+06	2.43659e+06	4.23406e+06	1.55233e+06	607979	1.23097e+07	3.4565e+06	392343	498226	569663	1.21173e+08	181284489	1.36417e+08	47720.4	3.72748e+06	42025.7	255173	94781.4	1.42698e+07	1.01829e+07	102672	2.56436e+06	81826	1.41202e+07	1.11306e+07	1.12133e+07	695681	494635	8.00707e+07	1.03305e+06	1.1519e+07	1.77239e+06	1.83997e+07	1.84653e+06	1.92281e+08	4.70912e+06	2.83237e+06	1.02571e+07	447439	6.62416e+07	3.67529e+07	681858	3.59498e+06	2.72185e+07	8.72255e+07	1.13444e+08
707M-M	Positive	657353	768911	3.73676e+06	2.1894e+06	5.09234e+06	864014	527335	1.72639e+07	3.70915e+06	273081	734081	846330	1.20299e+08	2.01876e+08	8.14465e+07	51420.2	3.62416e+06	51522.2	166582	69872.7	1.21009e+07	1.18284e+07	89339.8	2.12661e+06	44883.4	1.32152e+07	1.22043e+07	1.93317e+07	972206	544190	8.02159e+07	1.47278e+06	6.25107e+06	3.25526e+06	2.23055e+07	1.33949e+06	2.07709e+08	2.78027e+06	4.03709e+06	1.4344e+07	164204	7.66645e+07	5.97518e+07	1.09155e+06	5.52354e+06	2.48811e+07	7.57811e+07	1.0004e+08
707P-M	Positive	466967	820527	4.03566e+06	2.66644e+06	2.25887e+06	825193	348206	1.49804e+07	2.52838e+06	351939	1.01494e+06	810063	9.70246e+07	2.01336e+08	5.44849e+07	37487.5	2.49197e+06	33018	121803	107607	1.903e+07	6.94965e+06	107728	2.10106e+06	83914.5	1.00165e+07	1.31311e+07	1.53255e+07	925453	557620	6.17823e+07	1.626e+06	5.3492e+06	2.84151e+06	1.94003e+07	1.44043e+06	2.97567e+08	2.73243e+06	3.99259e+06	1.28209e+07	154051	6.40171e+07	5.84558e+07	819103	4.17757e+06	2.95994e+07	8.91916e+07	1.11386e+08
711 M	Positive	994791	294494	3.10718e+06	2.81639e+06	2.08634e+06	884990	173480	1.38667e+07	2.36607e+06	49921	544206	1.4208e+06	6.89035e+07	1.52147e+08	9.5762e+07	17774.4	49720.2	216364	376577	42765.2	2.87095e+06	1.18084e+06	107094	4.78258e+06	43628.2	3.5788e+07	2.03314e+07	1.26771e+07	658942	281774	2.35158e+08	1.39331e+06	1.51558e+06	2.35997e+06	1.744e+07	888931	161599173	2.93775e+06	4.51081e+06	1.77277e+07	55420.5	5.28808e+07	8.75452e+07	1.33065e+06	9.82498e+06	3.15703e+07	1.07541e+08	9.04079e+07
703A-M	Positive	828609	51200	2.98807e+06	1.03374e+06	2.0282e+06	520595	666172	9.25289e+06	1.79041e+06	275389	475160	1.02299e+06	3.56158e+07	1.10734e+08	3.7013e+08	32631.7	3.08862e+07	76204.5	253957	83917.3	1.25396e+07	485052	37252	1.66981e+06	163075	1.9102e+07	7.23217e+06	4.53622e+06	338780	273013	1.40017e+08	966266	1.07045e+07	2.98014e+06	1.10024e+07	614690	1.88929e+08	1.74099e+06	1.59472e+06	8.9511e+06	60011.1	3.62707e+07	6.02865e+07	967907	3.05644e+06	1.07194e+07	3.63947e+07	9.36259e+07
706 M	Positive	399257	23752.4	3.23979e+06	1.6797e+06	3.28363e+06	634806	667946	4.87584e+06	2.12071e+06	133246	590352	1.22789e+06	4.57179e+07	2.44751e+08	1.94645e+08	28731.1	98715	87112.1	129372	41463.2	7.61603e+06	786750	61258.9	2.96673e+06	34334.5	2.43898e+07	1.05314e+07	5.15487e+06	408824	500167	1.83753e+08	1.1379e+06	1.56883e+06	2.72257e+06	6.61414e+06	735120	1.35196e+08	2.12753e+06	2.12941e+06	1.23125e+07	88594.2	5.24845e+07	6.91877e+07	771430	3.21183e+06	1.74395e+07	9.04893e+07	8.28826e+07
707-B M	Positive	1.28041e+06	573164	5.16923e+06	2.24748e+06	8.66029e+06	2.59764e+06	416782	1.88511e+07	3.54978e+06	748269	541201	1.41519e+06	1.28358e+08	6.5992e+07	1.76523e+08	59125.6	1.77892e+06	89073.3	217552	202130	1.09472e+07	2.99586e+07	72626.3	2.56389e+06	130045	1.94758e+07	1.36746e+07	9.49543e+06	801599	970783	1.2357e+08	2.03505e+06	1.32187e+07	3.64001e+06	2.33886e+07	1.21934e+06	1.67566e+08	7.80007e+06	3.55007e+06	1.14644e+07	689037	6.09999e+07	8.60109e+07	1.17687e+06	4.68731e+06	2.44937e+07	6.35739e+07	9.80532e+07
707E-M	Positive	1.20699e+06	854983	6.3087e+06	2.52643e+06	1.49293e+06	1.94339e+06	334664	1.44856e+07	2.53738e+06	88058.6	485910	1.38061e+06	125898485	2.09626e+08	1.14395e+08	40504.3	1.31857e+06	115702	245460	82360	1.67258e+07	1.68128e+07	98279	2.40545e+06	50504.6	1.50534e+07	1.17138e+07	5.71817e+06	658097	762310	8.99984e+07	1.6807e+06	7.55097e+06	4.53382e+06	1.81168e+07	1.3419e+06	1.78413e+08	5.84477e+06	4.16248e+06	1.37329e+07	861567	6.84035e+07	7.30056e+07	868229	4.27748e+06	2.66893e+07	7.21252e+07	9.21625e+07
707H-M	Positive	423829	261132	5.2433e+06	2.70532e+06	9.79822e+06	2.28206e+06	414172	1.38097e+07	4.158e+06	256645	400830	889187	1.35065e+08	1.87256e+08	1.22864e+08	40534.2	1.31134e+06	57243.5	171993	139945	1.95867e+07	1.41584e+07	102133	2.00779e+06	107630	2.03518e+07	1.23015e+07	6.25492e+06	547947	698106	1.25394e+08	1.8595e+06	8.89502e+06	7.11038e+06	1.67172e+07	1.2672e+06	1.47505e+08	6.97321e+06	3.83341e+06	7.20218e+06	940170	8.97063e+07	4.42892e+07	829593	3.53303e+06	2.96537e+07	7.82311e+07	7.94709e+07
707K-M	Positive	424905	2.52072e+06	943567	2.31409e+06	2.49589e+07	934045	967124	5.49289e+07	3.3094e+07	48910.4	977619	539270	1.2298e+08	1.27715e+08	1.0527e+08	196019	2.48342e+06	39510.3	170770	29462.6	2.97938e+07	7.79074e+06	261144	342460	54488.2	3.57534e+06	1.90163e+07	9.01267e+06	5.28226e+06	2.04628e+06	5.28145e+07	3.48884e+06	4.4443e+06	9.03511e+06	6.91918e+07	4.40482e+06	1.66607e+08	2.98526e+06	5.78264e+06	7.34356e+06	712470	6.79406e+07	5.62668e+07	7.53507e+06	1.26721e+07	2.57192e+07	4.11241e+07	9.19159e+07
707N-M	Positive	986195	432221	4.40622e+06	1.6307e+06	1.16194e+07	895391	407013	1.97371e+07	3.78341e+06	280145	457113	1.19709e+06	1.16196e+08	2.4261e+08	5.90545e+07	94166.5	2.43231e+06	72774.7	174586	87713.2	2.14166e+07	9.34043e+06	66609.1	1.6591e+06	108793	1.05462e+07	1.55918e+07	7.05165e+06	947339	648792	7.0234e+07	1.46514e+06	6.23987e+06	4.36724e+06	2.63167e+07	1.1366e+06	2.07823e+08	2.93702e+06	2.97057e+06	1.73532e+07	126464	8.45957e+07	7.09957e+07	1.09688e+06	6.41389e+06	1.83829e+07	7.25713e+07	8.96772e+07
707Q-M	Positive	384180	333036	6.21894e+06	2.17561e+06	3.49454e+06	974008	446214	1.78551e+07	3.12844e+06	627672	718005	918832	1.14967e+08	2.43836e+08	8.02469e+07	55780.8	4.93855e+06	36285	171147	218615	2.11969e+07	7.69973e+06	75528.9	2.97607e+06	136742	1.49225e+07	1.26512e+07	2.88869e+07	773793	630339	9.35491e+07	1.44535e+06	9.62094e+06	3.63307e+06	2.37658e+07	1.4972e+06	1.78565e+08	3.39216e+06	3.32612e+06	1.15977e+07	137933	6.29371e+07	4.98574e+07	969610	3.66367e+06	2.37999e+07	8.20941e+07	7.83649e+07
709M	Positive	1.20279e+06	654693	2.88474e+06	1.20323e+06	4.56578e+06	1.61768e+06	572544	3.03409e+07	2.3249e+06	229367	594726	2.7553e+06	8.78186e+07	1.98966e+08	2.92087e+07	22631	129599	440210	153873	44582.8	5.19003e+06	626053	62715	2.76303e+06	24488.5	1.03881e+07	6.4373e+07	2.83983e+06	1.09467e+06	630694	8.00036e+07	639478	1.1978e+06	8.00914e+06	3.69379e+07	2.14129e+06	2.12786e+08	4.86495e+06	4.50605e+06	1.44574e+07	74817.5	5.05503e+07	1.48282e+08	2.09075e+06	8.3133e+06	13456320	7.08425e+07	1.07145e+08
704 M	Positive	438437	66359.5	4.0641e+06	1.50079e+06	2.79249e+06	497532	784350	9.70894e+06	2.73661e+06	796240	273971	854681	1.10922e+08	3.21084e+08	1.70818e+08	43325.2	205403	37016.4	315845	49314.5	6.26409e+06	663088	57321.1	1.36737e+06	58427.4	3.36586e+07	8.68707e+06	7.39268e+06	451734	200108	2.22088e+08	968288	1.10466e+06	1.06737e+06	1.251e+07	1.18381e+06	9.18166e+07	1.6206e+06	2.09708e+06	8.75652e+06	49791.9	3.15441e+07	4.03956e+07	678574	5.51426e+06	16123012	3.43476e+07	5.46047e+07
707M	Positive	1.25562e+06	478400	5.08632e+06	1.51948e+06	8.31075e+06	1.2017e+06	626886	2.14561e+07	3.61126e+06	342511	723438	1.29582e+06	1.31215e+08	8.80234e+07	2.01783e+08	42571.1	1.71453e+06	83328.8	187700	86723.3	1.96927e+07	9.01034e+06	33375.8	1.60581e+06	65862.7	1.99732e+07	1.36814e+07	1.1607e+07	1.01319e+06	1.03344e+06	135906826	1.98429e+06	1.36929e+07	4.56719e+06	2.68902e+07	1.37857e+06	1.57521e+08	4.05286e+06	4.00428e+06	1.19744e+07	338851	5.8498e+07	7.50695e+07	1.40125e+06	6.03169e+06	1.647e+07	4.35034e+07	8.08598e+07
707C- M	Positive	507962	196493	6.30978e+06	1.83526e+06	6.67378e+06	1729100	469699	1.48478e+07	3.59211e+06	336638	743948	1.53093e+06	1.70293e+08	7.32885e+07	1.91761e+08	47781.4	2.09689e+06	68958.3	220647	174948	5.4536e+07	2.40387e+07	79349	1.92198e+06	80974	1.784e+07	1.47983e+07	6.55795e+06	622450	1.18547e+06	1.03648e+08	1.73869e+06	1.39215e+07	1.07516e+07	1.69894e+07	1.15652e+06	1.21454e+08	5.73912e+06	3.32396e+06	8.30896e+06	934391	5.40294e+07	7.31619e+07	1.07657e+06	4.03429e+06	2.06958e+07	6.85418e+07	8.66073e+07
707F-M	Positive	953460	698941	4.94258e+06	1.92e+06	6.3617e+06	1.41678e+06	345845	1.71007e+07	3.506e+06	105540	535158	2.49263e+06	1.16458e+08	1.62618e+08	1.0979e+08	53453.6	1.74248e+06	79612.7	187118	43965.2	1.21099e+07	8.42769e+06	92138.8	3.76025e+06	38986.9	1.79711e+07	1.53359e+07	9.24301e+06	799043	640400	1.02012e+08	1.81904e+06	8.6147e+06	3.70276e+06	2.12016e+07	1.18294e+06	1.47957e+08	4.71133e+06	4.33027e+06	1.83704e+07	649138	6.82759e+07	1.23209e+08	1.18847e+06	6.79259e+06	2.09051e+07	8.96733e+07	9.25061e+07
707I-M	Positive	461937	853417	5.91145e+06	3.00067e+06	1.43229e+06	1.96314e+06	640193	1.36853e+07	4.79804e+06	904557	380458	1.02591e+06	1.48588e+08	1.53336e+08	1.19835e+08	59703.8	1.47764e+06	62394.5	222064	157045	1.7808e+07	9.87667e+06	107295	2.25552e+06	145128	1.62164e+07	1.31701e+07	7.86777e+06	759843	642620	9.43494e+07	1.27166e+06	8.68387e+06	4.88119e+06	1.76064e+07	1.68469e+06	1.96453e+08	6.23675e+06	3.19114e+06	9.6646e+06	810657	6.88125e+07	5.254e+07	667687	3.54573e+06	3.48787e+07	66832151	1.08026e+08
707M-M2	Positive	592146	945200	4.13638e+06	1.7813e+06	5.36267e+06	969051	653509	1.53676e+07	3.76913e+06	202502	732480	579448	1.31314e+08	2.1919e+08	9.05917e+07	40650	3.3761e+06	32163.1	155525	79513.7	2.31863e+07	1.0214e+07	71310.7	1.49743e+06	22797.8	1.23925e+07	1.21251e+07	1.33568e+07	905253	688488	7.29478e+07	1.47535e+06	7.44476e+06	4.47202e+06	1.95765e+07	1.41406e+06	2.03225e+08	3.3097e+06	3.09374e+06	1.29228e+07	157123	8.01384e+07	4.33109e+07	955720	4.39927e+06	2.03224e+07	6.18635e+07	1.02513e+08
707O-M	Positive	1.0395e+06	395519	4.42735e+06	2.40899e+06	7.67115e+06	1.03269e+06	371290	1.60263e+07	3.61682e+06	622265	546139	991317	1.1278e+08	2.45838e+08	6.77073e+07	27848.2	2.92605e+06	95326.7	157598	154021	1.26425e+07	4.63182e+06	97071.9	2.97285e+06	115201	1.06518e+07	1.47773e+07	8.74476e+06	885954	690524	6.89638e+07	1.1959e+06	6.1929e+06	4.03169e+06	2.05278e+07	1.31004e+06	2.25815e+08	3.17884e+06	3.18111e+06	1.96851e+07	159337	7.31619e+07	5.88573e+07	1.0195e+06	5.04879e+06	2.88105e+07	8.97542e+07	8.5953e+07
707R-M	Positive	303965	685602	4.8525e+06	3.12799e+06	2.94864e+06	989751	256924	1.13589e+07	2.66201e+06	275701	698981	960005	9.07641e+07	2.06925e+08	6.34015e+07	52533.8	2.5102e+06	48742.8	189101	48682.3	1.41989e+07	6.35121e+06	115843	1.75525e+06	26931	1.45368e+07	1.39625e+07	1.20558e+07	443309	525127	7.05915e+07	1.03345e+06	6.49615e+06	3.40324e+06	1.4727e+07	1.82547e+06	3.19024e+08	3.25425e+06	3.55151e+06	1.80949e+07	159365	6.94779e+07	5.79633e+07	745275	4.32854e+06	3.49678e+07	5.38016e+07	1.03802e+08
715 M	Positive	405071	65268.2	4.51428e+06	1.5361e+06	3.84858e+06	1.65132e+06	465378	6.08186e+06	2.11129e+06	87169.1	219521	753070	8.8842e+07	2.8138e+08	1.87986e+08	29399.2	976455	38651	157247	32977.8	1.01427e+07	5.82808e+06	67932	1.34933e+06	25435.9	1.94133e+07	7.11246e+06	3.82421e+06	298649	139362	1.34286e+08	1.32255e+06	2.82378e+06	1.64642e+06	8.35431e+06	584911	1.80926e+08	5.28165e+06	1.25305e+06	9.40068e+06	102395	5.76921e+07	4.48978e+07	530637	1.92246e+06	1.77057e+07	4.69277e+07	8.52544e+07
719 M	Positive	3.26446e+06	340551	4.95827e+06	2.27488e+06	3.84108e+06	319529	1.45624e+06	2.78214e+07	4.64538e+06	327458	985690	2.05658e+06	5.05462e+07	4.03826e+07	1.31534e+08	46694.6	130747	389598	1.25581e+06	67514.4	1.42923e+07	1.01342e+06	80431.6	2.00946e+06	138479	2.13678e+07	2.51511e+07	1.49463e+07	1.35221e+06	451866	1.39384e+08	2.10779e+06	1.06496e+06	4.14101e+06	3.33528e+07	1.44679e+06	2.51369e+08	945701	5.9333e+06	1.95182e+07	86376.5	5.44122e+07	8.92092e+07	2.77472e+06	1.37978e+07	2.50911e+07	7.05876e+07	1.0016e+08
720 B-M	Positive	2.24508e+06	647052	7.26108e+06	4.54194e+06	4.53219e+06	353918	816935	2.07671e+07	4.5811e+06	275069	973859	2.1824e+06	8.2683e+07	7.88869e+07	8.04434e+07	42565.5	79248.6	498818	1.0957e+06	16938.7	1.00676e+07	2.04338e+06	199947	3.5372e+06	110952	3.1656e+07	3.28224e+07	9.42981e+06	1.08369e+06	441244	2.01035e+08	1.91645e+06	2.10476e+06	3.05734e+06	2.65216e+07	2.07263e+06	153781680	1.11554e+06	4.40446e+06	1.76646e+07	54886.5	5.0707e+07	9.49161e+07	3.09296e+06	1.09263e+07	4.92867e+07	9.36005e+07	1.06923e+08
722A- M	Positive	450195	188219	4.20665e+06	5.84922e+06	6.68452e+06	795304	253572	9.66571e+06	1.92786e+06	56348.7	655857	2.37198e+06	8.35602e+07	5.97226e+07	1.03571e+08	69387.2	79284.7	93903.5	451601	90259.6	1.22252e+07	2.50297e+06	235123	5.85089e+06	170024	2.25955e+07	1.3322e+07	7.18426e+06	423399	277337	1.5352e+08	1.98152e+06	914177	4.14788e+06	1.26416e+07	851217	2.27801e+08	2.6368e+06	4.5179e+06	1.45781e+07	106463	7.03898e+07	1.14737e+08	881185	8.95652e+06	6.91875e+07	1.09404e+08	106029146
728M	Positive	1.38615e+06	1.03189e+06	5.54088e+06	4.31155e+06	6.38636e+06	573107	268960	1.66973e+07	3.40266e+06	101295	1.26502e+06	2.00225e+06	9.96083e+07	3.40752e+07	7.5642e+07	52274.4	36326.1	354787	732471	54644.5	1.59422e+07	1.94269e+06	177966	3.35932e+06	118680	3.38384e+07	2.7958e+07	9.4671e+06	1.12742e+06	608938	2.09928e+08	2.27487e+06	603019	6.08898e+06	2.10608e+07	1.547e+06	1.66116e+08	1.67841e+06	3.6921e+06	1.15376e+07	77368.8	7.75684e+07	1.0107e+08	2.10375e+06	7.34221e+06	4.64863e+07	1.10142e+08	1.22723e+08
731M	Positive	855465	138040	6.70103e+06	3.46819e+06	6.55691e+06	1.58813e+06	311824	1.60851e+07	2.68369e+06	127971	1.2035e+06	2.02592e+06	3.21684e+07	122449212	1.48951e+08	49151.6	5.94907e+06	702056	304635	57400.4	2.10418e+07	4.20083e+06	91635.8	4.96567e+06	45167.9	1.64857e+07	1.06929e+07	9.94929e+06	845573	415064	1.21471e+08	2.46382e+06	2.2055e+07	2.88245e+06	1.9567e+07	1.26967e+06	1.93321e+08	5.17439e+06	3.21466e+06	1.52381e+07	781056	8.42714e+07	9.60016e+07	1.26427e+06	7.08412e+06	3.06107e+07	97819997	1.02855e+08
720 M	Positive	2.98702e+06	550266	1.01355e+07	3.57661e+06	7.38563e+06	436494	452439	2.16022e+07	3.09594e+06	551051	1.17574e+06	2.821e+06	6.95861e+07	4.85641e+07	7.59558e+07	56706.8	69026.1	552273	873783	115271	1.20429e+07	1.8204e+06	133870	5.2033e+06	173031	2.43486e+07	2.62798e+07	1.28136e+07	921381	455277	1.33856e+08	1.64547e+06	1.97497e+06	1.90701e+06	2.75327e+07	1.82543e+06	2.38352e+08	1.36501e+06	4.90874e+06	2.26518e+07	134847	6.80843e+07	1.0711e+08	2.50203e+06	1.29608e+07	3.82264e+07	100142556	1.25925e+08
721M	Positive	938221	643130	3.63512e+06	524087	5.9739e+06	504613	675804	9.58366e+06	2.46802e+06	211973	688428	1.24939e+06	6.72154e+07	3.37158e+08	1.88304e+08	31712.3	301303	133349	274047	92931.9	7.9772e+06	4.17239e+06	24244.3	704029	111207	2.44787e+07	1.13437e+07	7.4469e+06	396987	476444	1.76181e+08	1.00657e+06	1.7399e+06	2.54757e+06	1.31865e+07	598486	1.11551e+08	1.66046e+06	2.59429e+06	1.06896e+07	376463	4.54188e+07	8.33132e+07	1.28599e+06	3.23018e+06	6.23661e+06	2.98694e+07	5.32201e+07
723M	Positive	736354	276359	4.87839e+06	3.73075e+06	2.78566e+06	448420	603398	1.61441e+07	2.70464e+06	396388	1.20694e+06	1.40893e+06	5.01133e+07	2.21644e+08	6.99968e+07	46739.4	28394	143385	426099	60139	1.27983e+07	1.6485e+06	168813	2.13384e+06	89328	2.98478e+07	2.46756e+07	1.05714e+07	961081	602702	170318816	1.49013e+06	1.92535e+06	2.85482e+06	2.22585e+07	1.5945e+06	1.59911e+08	1.30978e+06	4.38025e+06	1.80481e+07	56063.9	5.86043e+07	7.92869e+07	2.53782e+06	1.08463e+07	3.97541e+07	6.50053e+07	1.24312e+08
726 M	Positive	1.52944e+06	507020	4.44778e+06	2.15265e+06	4.16572e+06	632907	486944	3.22339e+07	5.45208e+06	126818	1.28405e+06	2.39429e+06	5.92134e+07	1.54856e+08	5.17023e+07	57820	55110.2	302775	813302	34606.8	1.81808e+07	839318	89364.1	1.42031e+06	89690.8	2.79736e+07	4.15626e+07	1.87521e+07	1.61109e+06	663360	2.20899e+08	2.53436e+06	2.89447e+06	5.43687e+06	4.20114e+07	2.05519e+06	1.00991e+08	1.7416e+06	5.27441e+06	1.79009e+07	180823	6.05836e+07	1.39809e+08	3.72196e+06	1.35925e+07	2.26078e+07	6.95459e+07	8.0433e+07
728A-M	Positive	1.32428e+06	497624	5.37627e+06	4.32104e+06	5.16132e+06	727384	215313	1.42945e+07	2.78026e+06	158525	1.04116e+06	1.5651e+06	8.72259e+07	2.24669e+07	8.10722e+07	23583.4	35975.3	242539	660235	136317	1.20916e+07	2.00916e+06	137199	6.30684e+06	146672	2.63406e+07	2.20238e+07	9.38564e+06	877470	478404	1.46763e+08	2.53314e+06	952640	2.75343e+06	1.82875e+07	1.40409e+06	1.98301e+08	2.60917e+06	2.38305e+06	1.8144e+07	85847.5	1.37583e+08	8.54749e+07	1.59716e+06	7.64074e+06	4.74871e+07	1.46441e+08	1.13775e+08
732 M	Positive	1.61428e+06	125094	6.58812e+06	5.93422e+06	5.46716e+06	415527	820145	1.73775e+07	3.04412e+06	127436	590848	2.15499e+06	7.52043e+07	4.42159e+07	1.27821e+08	27314.5	74145.8	661643	1.00095e+06	67449.8	1.3671e+07	2.46862e+06	214228	4.33872e+06	156689	2.59218e+07	3.29299e+07	1.21151e+07	737510	301118	1.56931e+08	1.31346e+06	898869	3.70589e+06	2.18587e+07	2.04423e+06	1.90365e+08	1.41782e+06	4.76867e+06	2.10458e+07	101986	5.94706e+07	8.99843e+07	1.53538e+06	9.56072e+06	6.37218e+07	8.09426e+07	1.12529e+08
714M	Positive	1.49771e+06	366844	3.88161e+06	2.59402e+06	2.17503e+06	267124	325146	1.32131e+07	1.78825e+06	66760.2	614561	1.96182e+06	9.76759e+07	1.60065e+08	4.19987e+07	6.65077e+06	71230.1	296157	528863	20198.8	1.08157e+07	1.30171e+06	98687.8	4.86807e+06	34709.9	2.43143e+07	1.82487e+07	6.16272e+06	930214	315968	1.5473e+08	1.35314e+06	904608	2.21717e+06	1.44328e+07	1.56744e+06	1.88884e+08	869436	4.93209e+06	2.40015e+07	145630	9.3867e+07	9.49645e+07	1.67164e+06	6.30922e+06	2.72858e+07	1.05532e+08	1.14764e+08
718M	Positive	215651	0	2.35568e+06	803948	1.58412e+06	1.15791e+06	629856	3.35435e+06	1.34935e+06	48176.1	322951	505648	2.11625e+07	3.31969e+08	2.74805e+08	9.0779e+06	93638	68516.2	98471.1	5231.25	1.02099e+07	1.82544e+06	35258.4	1.05494e+06	28439	3.12368e+07	8.86092e+06	4.4679e+06	315768	179116	2.75825e+08	1.33017e+06	1.38805e+06	1.38369e+06	4.12274e+06	802683	6.25865e+07	3.51343e+06	1.19428e+06	5.92287e+06	897877	4.3981e+07	3.70293e+07	438457	1.47008e+06	8.49196e+06	3.19936e+07	4.17002e+07
720 A- M	Positive	2.12789e+06	361258	5.28421e+06	4.09132e+06	4.46776e+06	332081	522533	2.05855e+07	2.7257e+06	111788	998780	2.12093e+06	7.90022e+07	6.13674e+07	7.10858e+07	36221.9	43320.2	435461	777030	22573.9	4.95663e+06	1.68491e+06	153900	4.69312e+06	34276.4	2.7278e+07	3.18873e+07	1.2713e+07	1.15335e+06	363213	180934818	1.46435e+06	1.78458e+06	3.40049e+06	2.94838e+07	2.11706e+06	182013410	891464	5.17191e+06	2.29886e+07	79635.5	6.15706e+07	1.08897e+08	2.42109e+06	1.22665e+07	4.48145e+07	1.01775e+08	1.28591e+08
722 M	Positive	667789	622227	4.7572e+06	3.84785e+06	6.67071e+06	1.00051e+06	549328	1.11717e+07	2.1873e+06	44588.1	592559	2.02359e+06	8.32023e+07	6.46071e+07	9.95056e+07	42242.5	76559.3	149201	405568	124697	4.68512e+06	1.65275e+06	180217	2.92796e+06	256681	2.31755e+07	1.62629e+07	7.82765e+06	515945	381748	1.77942e+08	1.89454e+06	947254	3.90302e+06	1.36686e+07	888298	2.41656e+08	3.3525e+06	4.36785e+06	1.26169e+07	79892.6	7.13888e+07	1.13611e+08	853072	8.37182e+06	5.07828e+07	9.41468e+07	9.79967e+07
724 M	Positive	710141	51778	3.56334e+06	1.22144e+06	3.48111e+06	859105	993171	6.41846e+06	2.60246e+06	109478	489188	579076	5.26855e+07	2.78865e+08	2.44066e+08	46826	1.37997e+06	105300	173598	29386.5	1.20857e+07	1.54542e+07	57856.7	1.2251e+06	47150.1	3.48253e+07	8.45034e+06	2.25862e+06	293102	279718	2.45845e+08	1.73892e+06	3.3883e+06	848943	8.6668e+06	557711	7.34341e+07	2.71031e+06	1.96526e+06	4.88649e+06	152090	5.53113e+07	4.82001e+07	404811	1.76023e+06	1.39502e+07	3.65197e+07	4.52049e+07
727 M	Positive	438058	291548	5.26904e+06	4.09235e+06	7.30892e+06	394642	748316	1.23709e+07	2.55892e+06	267377	1.04746e+06	1.63541e+06	5.35564e+07	7.5697e+07	6.74229e+07	21904.7	46890.4	98816.8	257093	108398	1.18575e+07	1.82771e+06	157846	4.36474e+06	182215	1.50764e+07	1.46455e+07	8.63343e+06	735109	475077	9.22397e+07	850449	954674	2.69159e+06	1.56361e+07	1.2589e+06	2.78275e+08	1.15148e+06	3.13127e+06	1.60457e+07	33306.1	1.06683e+08	8.86163e+07	1.29402e+06	4.56725e+06	4.75548e+07	1.01757e+08	1.66748e+08
18 M	Negative	147387	450180	6.0598e+06	4.7972e+06	440332	434378	2.38719e+06	7.81174e+06	3.06543e+06	998451	425923	1.44367e+06	5.74911e+07	2.22788e+08	7.59316e+07	16925.3	176004	101102	157048	64868.8	1.36009e+07	2.15252e+06	278610	731073	96490.4	1.90246e+07	1.33506e+07	2.03194e+06	249969	218609	1.40181e+08	325348	464832	1.83024e+06	6.63889e+06	753974	3.93619e+07	1.34413e+06	1.87618e+06	1.9859e+07	103158	7.07582e+07	6.95901e+07	460095	1.4178e+06	5.94937e+07	7.85183e+07	9.09511e+07
21 M	Negative	1.17936e+06	49663.5	5.0582e+06	2.85598e+06	437020	738614	2.54387e+06	1.31271e+07	2.22207e+06	105068	292647	1.298e+07	5.73866e+07	3.16646e+07	248350036	76175.8	210964	775122	202524	10989.2	1.85376e+07	1.21954e+06	150281	345059	19005.8	1.52558e+07	3.13098e+07	2.70814e+06	547728	235462	1.16192e+08	668948	8.34364e+06	2.44325e+06	1.66749e+07	1.9104e+06	39825669	2.52272e+06	4.17698e+06	1.72071e+07	190317	3.3616e+07	124175018	942382	4.54836e+06	4.00021e+07	3.40594e+07	1.09984e+08
14 M	Negative	945349	2.13017e+06	7.09254e+06	5.09712e+06	517931	413841	1.80064e+06	1.47143e+07	4.19773e+06	274973	965371	1.66353e+06	5.27166e+07	7.44614e+06	1.92329e+08	44812.5	32417.3	213035	228080	49512	1.10709e+07	2.41425e+06	215768	637437	81122.3	1.47143e+07	1.86536e+07	5.2898e+06	530838	363812	7.31081e+07	1.34302e+06	2.21366e+06	3.67739e+06	1.71474e+07	1.90266e+06	1.26656e+08	1.51471e+06	3.83345e+06	2.37515e+07	161483	6.23331e+07	9.83658e+07	1.14921e+06	4.09609e+06	7.07909e+07	9.04873e+07	1.61046e+08
28 M	Negative	2.02226e+06	12583.5	5.88871e+06	4.23172e+06	344328	762543	1.85116e+06	1.0443e+07	1.67587e+06	350494	461097	1.43261e+06	8.30171e+07	2.73798e+07	3.20309e+08	35907.2	1.30238e+06	423839	287938	79327	7.38905e+07	2.03929e+06	170996	746409	464981	8.66966e+06	1.55328e+07	3.3641e+06	379601	450925	6.9766e+07	1.36686e+06	1.15707e+06	3.64729e+06	1.21103e+07	1.1941e+06	3.89393e+07	2.42431e+06	3.08033e+06	3.22942e+07	158225	5.01964e+07	7.34517e+07	846831	2.59571e+06	5.16005e+07	6.10781e+07	9.12662e+07
12 M	Negative	56260.2	86218.2	4.82437e+06	1.94789e+06	650387	1.08949e+06	3.76673e+06	8.57569e+06	1.91252e+06	647064	327086	3.98452e+06	5.15067e+07	1.41513e+07	613917898	88700.1	188483	273698	132609	60938.8	2.09148e+07	2.22913e+06	78461.7	747197	121343	4.46567e+06	1.08216e+07	3.58764e+06	207725	256713	3.03837e+07	730057	1.91431e+06	6.87874e+06	5.6638e+06	740192	4.18815e+07	3.98317e+06	1.86792e+06	8.15259e+06	192410	5.47323e+07	3.60026e+07	346663	1.52628e+06	2.35162e+07	3.93324e+07	6.88837e+07
23 M	Negative	895855	225717	5.5331e+06	4.21639e+06	438097	321665	2.39658e+06	1.17423e+07	1.76443e+06	104057	405599	5.1697e+06	3.03769e+07	1.29336e+08	6.88373e+07	39075.5	252303	426928	455349	15491.7	9.10457e+06	1.94463e+06	140265	695699	55204.8	1.39547e+07	3.07173e+07	6.32295e+06	317897	272097	6.9518e+07	910379	809205	4.17371e+06	1.43801e+07	1.82625e+06	1.24379e+08	1.06733e+06	3.85926e+06	1.21678e+07	533059	5.45423e+07	1.73582e+08	656820	5.11229e+06	5.16493e+07	4.53526e+07	2.03364e+08
31 M	Negative	358926	788696	5.23207e+06	3.09647e+06	397083	327138	1.21293e+06	6.84863e+06	3.72257e+06	343757	670589	549194	4.29189e+07	1.20683e+08	5.15877e+07	27997.1	94158.2	94263.5	235055	48575.3	1.98022e+07	1.43834e+06	124835	778245	80708.6	1.67426e+07	1.26632e+07	6.8591e+06	386531	447349	8.41381e+07	561624	728828	2.64973e+06	9.09372e+06	1.25718e+06	2.79318e+08	1.08482e+06	3.65686e+06	2.78761e+07	125339	5.33725e+07	2.63463e+07	855023	2.75637e+06	4.65734e+07	9.43367e+07	2.24368e+08
37 M	Negative	926755	365799	6.74359e+06	3.40481e+06	848777	482619	2.14827e+06	1.55527e+07	5.01925e+06	1.46081e+06	634810	2.9505e+06	5.68524e+07	1.58141e+08	5.13632e+07	26739.3	395193	270076	427623	147519	1.30695e+07	1.44158e+06	159339	1.03504e+06	312785	2.22182e+07	2.49628e+07	9.1646e+06	627769	354972	1.43765e+08	802231	1.60838e+06	2.14154e+06	2.01271e+07	943468	7.2398e+07	1.5137e+06	4.99692e+06	2.1434e+07	121220	5.41078e+07	1.13705e+08	1.63239e+06	4.99556e+06	4.48284e+07	1.14228e+08	1.34616e+08
58 M	Negative	980942	117285	5.2716e+06	8.38685e+06	386994	364436	1.70042e+06	8.23702e+06	1.1126e+06	57411.3	528819	3.10899e+06	2.85586e+07	4.84459e+07	5.52321e+07	24050.4	17887.6	136024	773410	3677.85	1.31011e+07	4.92875e+06	291520	2.34774e+06	8843.95	2.06413e+07	2.11126e+07	7.87929e+06	387227	374933	1.04621e+08	858417	460004	3.41168e+06	9.99079e+06	2.15505e+06	1.41905e+08	1.16374e+06	5.09493e+06	1.8662e+07	637734	8.96344e+07	1.13103e+08	1.03385e+06	5.002e+06	1.45149e+08	3.5062e+07	2.33747e+08
82 M	Negative	189369	388822	2.72305e+06	6.41513e+06	746783	437703	2.43714e+06	6.0238e+06	1.53978e+06	236917	765288	1.30018e+06	7.42973e+07	166038354	6.97749e+07	4.34155e+07	66632	133153	150763	14809.5	163897	2.21609e+06	157523	950399	2288.7	1.48595e+07	1.14999e+07	209467	270511	280114	9.82017e+07	998882	586129	1.89398e+06	6.52524e+06	789404	8.48785e+07	4.00354e+06	2.49211e+06	1.49241e+07	384809	146656445	7.23591e+07	533335	1.67815e+06	4.83256e+07	8.59265e+07	1.27275e+08
83 M	Negative	2.14021e+06	103675	1.01139e+07	7.42902e+06	754662	431438	1.84197e+06	1.79939e+07	3.14427e+06	282502	1.31954e+06	2.26601e+06	8.63124e+07	4.05229e+07	9.62602e+07	61919.5	46073.9	165616	1.84131e+06	15503.3	5.98335e+07	3.45902e+06	324486	1.16874e+06	30779.1	1.71162e+07	2.03346e+07	7.79945e+06	494764	500326	9.33344e+07	2.83533e+06	1.14406e+06	7.10225e+06	2.13587e+07	2.48646e+06	109509838	1.54736e+06	4.01138e+06	25747421	615305	6.99277e+07	9.93324e+07	1.64707e+06	4.57146e+06	9.04086e+07	6.94888e+07	1.13523e+08
103 M	Negative	1.07333e+06	78946	4.3897e+06	3.06968e+06	1.25913e+06	254039	4.31742e+06	1.01746e+07	3.93751e+06	4.19183e+06	1.04768e+06	2.44612e+06	6.44717e+07	1.58489e+07	1.05659e+08	20665.2	94112.8	453325	860003	282848	1.22291e+08	1.36584e+06	126057	638427	1.06714e+06	1.40879e+07	3.98179e+07	7.7164e+06	735752	1.36975e+06	1.09573e+08	1.34675e+06	938700	1.89795e+07	8.69104e+06	1.67113e+06	4.17786e+07	802891	5.48635e+06	5.0286e+07	153656	5.37101e+07	1.33052e+08	1.88699e+06	1.07616e+07	3.51219e+07	8.00271e+07	9.1767e+07
101 M	Negative	1.26421e+06	4109.37	5.22211e+06	5.01339e+06	645182	603834	2.086e+06	1.13499e+07	2.2137e+06	471243	628033	3.76725e+06	6.12717e+07	1.19706e+07	2.54486e+08	32261.2	116741	244350	253240	26301.8	8.95577e+06	3.96885e+06	223530	661769	8200.37	1.06405e+07	1.71135e+07	4.93708e+06	356126	235987	6.72126e+07	2.16128e+06	1.3697e+06	3.65002e+06	1.268e+07	1.89885e+06	1.25563e+08	2.11416e+06	3.37481e+06	2.28771e+07	132530	3.91926e+07	1.04632e+08	687998	3.35822e+06	6.6858e+07	7.20009e+07	1.77342e+08
103 A-M	Negative	442177	3741.28	6.86845e+06	4.64039e+06	1.72743e+06	872019	2.09033e+06	8.37024e+06	4.53568e+06	256993	1.13413e+06	1.80741e+06	1.03544e+08	2.94235e+07	1.34764e+08	20156.4	90936	88095.9	598717	49994.9	5.03119e+07	2.18763e+06	195223	1.21965e+06	46108.2	1.68455e+07	1.92039e+07	2.7626e+06	588759	532277	120164538	1.2903e+06	967393	3.64948e+06	1.0631e+07	1.79909e+06	1.14607e+08	3.06148e+06	2.06333e+06	3.2231e+07	149508	6.43498e+07	9.65808e+07	859372	3.7584e+06	5.82854e+07	1.08148e+08	1.14549e+08
112 M	Negative	614901	235489	5.13071e+06	3.97469e+06	3.12857e+06	230275	2.78711e+06	7.80219e+06	3.019e+06	187354	375240	4.31219e+06	6.49194e+07	6.05489e+07	6.73778e+07	38786.3	84672.6	383446	532020	50214.9	1.93028e+07	2.0709e+06	143327	1.02451e+06	93728.9	1.29292e+07	2.01223e+07	6.63024e+06	374709	342166	6.16415e+07	816651	578483	5.49707e+06	8.68846e+06	1.3634e+06	1.37492e+08	831604	4.21524e+06	2.77706e+07	104882	3.91519e+07	1.43861e+08	900441	4.73048e+06	5.57232e+07	1.51145e+08	1.36577e+08
87 M	Negative	595915	279804	6.21873e+06	5.17153e+06	1.83996e+06	212056	1.81383e+06	9.8318e+06	3.17265e+06	175424	443345	1.0986e+06	6.57904e+07	9.1886e+07	5.66018e+07	46543.3	44053.1	283770	426747	32795.8	2.83009e+07	2.4674e+06	197828	449350	64648	1.81934e+07	2.12257e+07	4.03602e+06	420844	503221	1.09344e+08	546846	723740	3.76185e+06	1.11182e+07	1.21667e+06	182109367	786086	2.41745e+06	1.7734e+07	49720.8	5.39371e+07	4.87915e+07	1.31709e+06	3.07156e+06	8.1411e+07	9.92369e+07	1.74583e+08
110 M	Negative	2.10182e+06	16498.2	5.22293e+06	6.37802e+06	3.51637e+06	264690	2.84167e+06	1.16366e+07	4.11646e+06	78477.5	758079	2.71217e+06	5.25341e+07	1.71724e+07	1.02583e+08	61035.7	86535.3	335447	862848	23303.2	8.86097e+06	2.955e+06	293511	640968	47122.8	1.32182e+07	1.53648e+07	9.00442e+06	345957	234695	7.6824e+07	1.12672e+06	552112	1.95904e+06	1.4574e+07	1.59027e+06	2.46203e+08	915468	3.8381e+06	2.59846e+07	106898	3.09556e+07	6.45096e+07	740551	4.28924e+06	8.22469e+07	1.04503e+08	1.34442e+08
129 M	Negative	907925	166255	5.0287e+06	4.21298e+06	3.85638e+06	609090	1.71957e+06	7.49274e+06	2.51777e+06	497838	643885	1.6009e+06	7.55004e+07	2.01334e+07	8.06935e+07	41967.5	64508.3	283525	218820	68728.6	1.8216e+07	1.92725e+06	176498	959241	102434	1.47006e+07	2.01334e+07	5.84016e+06	322438	392686	8.54872e+07	773843	726161	3.49013e+06	9.02809e+06	843932	2.70937e+08	2.15526e+06	3.38167e+06	2.35689e+07	64825.9	45380131	8.14925e+07	510276	3.72705e+06	5.51273e+07	1.07858e+08	1.57392e+08
138 M	Negative	1.03092e+06	84787	4.83593e+06	4.46757e+06	4.31761e+06	433001	1.45218e+06	6.98103e+06	2.70277e+06	1.13739e+06	479602	924757	4.23201e+07	1.64808e+08	7.78491e+07	59361.8	63425.6	286463	467572	183879	2.733e+07	1.71154e+06	162035	707415	352961	2.26094e+07	1.61495e+07	4.97929e+06	384076	280865	9.44127e+07	459196	782926	2.37633e+06	9.19282e+06	1.17666e+06	2.21385e+08	1.45878e+06	3.133e+06	2.66674e+07	109511	8.28182e+07	3.75994e+07	645338	3.01956e+06	5.85524e+07	120086326	9.85536e+07
133 M	Negative	3.09113e+06	38228.1	4.81764e+06	7.03114e+06	3.99324e+06	419132	2.43288e+06	1.33471e+07	3.26017e+06	475020	720290	1.56166e+06	5.18311e+07	1.67951e+07	1.0711e+08	51395.7	134156	616939	501979	129207	3.08095e+07	3.16992e+06	319325	627545	252948	1.87971e+07	2.50258e+07	1.12338e+07	648377	373830	1.25685e+08	1.14799e+06	954791	4.53764e+06	1.65726e+07	1.9976e+06	1.60184e+08	1.48482e+06	4.42157e+06	3.52585e+07	99907.1	4.92729e+07	6.90711e+07	1.30574e+06	5.23072e+06	9.33182e+07	8.84243e+07	1.39032e+08
139 M	Negative	741996	95011.4	7.16986e+06	4.21781e+06	1.94559e+06	933932	1.86351e+06	1.3333e+07	3.79129e+06	332722	377595	2.14762e+06	86545670	2.30947e+07	1.07379e+08	37276.1	144481	122376	317267	95633.9	5.98796e+07	1.96812e+06	185685	1.77113e+06	271292	1.14203e+07	1.86901e+07	6.60777e+06	542473	624019	7.16651e+07	300440	690136	6.19575e+06	1.53568e+07	1.52345e+06	1.21934e+08	3.29125e+06	2.42517e+06	2.14281e+07	106234	7.22603e+07	9.8093e+07	1.00293e+06	3.01583e+06	6.85699e+07	1.77377e+08	1.15236e+08
119 M	Negative	759842	264619	3.90428e+06	1.52345e+06	2.33963e+06	468511	835407	1.03665e+07	1.50311e+06	97313.6	693165	5.0163e+06	9.125e+07	1.25391e+08	4.77976e+07	24212.5	84057.9	299473	1.02758e+06	48646.8	7.01446e+07	764954	70169.2	982466	66065.9	11297619	3.20306e+07	7.01446e+06	450250	747698	8.00765e+07	747504	518386	7.01446e+06	1.22287e+07	1.43634e+06	2.41941e+08	1.59101e+06	5.27051e+06	2.58231e+07	87746.8	5.52466e+07	1.0801e+08	1.25333e+06	4.65786e+06	2.03605e+07	9.3733e+07	1.21667e+08
140 M	Negative	1.67988e+06	31619	4.18135e+06	7.622e+06	2.23794e+06	228559	1.77675e+06	9.54496e+06	2.38241e+06	122054	326552	965864	3.2996e+07	3.01983e+07	1.67037e+08	43496	134570	340859	725820	42327.1	2.0571e+07	3.5704e+06	369727	832459	156456	2.2299e+07	1.39883e+07	8.1036e+06	359541	169903	143174449	949077	480777	2.87691e+06	1.20135e+07	1.25328e+06	2.02361e+08	797060	3.63132e+06	3.13503e+07	135961	5.34024e+07	3.82621e+07	749711	3.22728e+06	1.00387e+08	9.54496e+07	1.09438e+08
153 M	Negative	447262	315532	4.07704e+06	3.12453e+06	1.98079e+06	533406	2.2591e+06	5.78164e+06	2.8627e+06	169451	672260	1.1782e+07	6.74704e+07	6.11861e+06	3.58197e+08	16973	374889	152995	224583	48354.3	2.16109e+07	1.85448e+06	159551	390645	82769.4	1.23369e+07	1.64209e+07	3.68667e+06	298556	260991	9.52923e+07	2.05087e+06	2.98186e+06	2.32051e+06	7.20233e+06	1.11415e+06	140882005	1.82788e+06	3.32731e+06	1.52298e+07	23678.5	4.36473e+07	5.79411e+07	769289	2.17721e+06	4.44981e+07	6.38118e+07	8.59332e+07
155 M	Negative	800531	194473	4.68375e+06	3.85812e+06	2.02219e+06	1.00814e+06	2.52194e+06	8.28532e+06	3.53166e+06	224919	433809	1.55446e+06	7.70415e+07	1.64154e+07	9.7183e+07	28798.2	222050	213183	283178	43320.4	1.31927e+07	1.84011e+06	143127	1.15269e+06	36884.6	1.51062e+07	1.41998e+07	7.99035e+06	416226	372881	8.86229e+07	911488	766429	4.06882e+06	9.91405e+06	999890	2.1463e+08	3.55711e+06	3.07358e+06	2.29614e+07	28079.4	6.65679e+07	6.42516e+07	737270	3.41935e+06	4.97497e+07	1.53076e+08	1.32934e+08
158 M	Negative	1.26542e+06	79911.1	5.74696e+06	6.04699e+06	2.10984e+06	388649	2.05558e+06	1.00321e+07	3.66328e+06	490685	693406	3.1635e+06	3.9135e+07	2.53285e+07	8.27398e+07	27149.6	96248	303477	731982	160728	1.53958e+07	2.64179e+06	250947	1.05008e+06	324310	2.01635e+07	1.83756e+07	1.28132e+07	413083	303243	1.01314e+08	838809	388515	3.49875e+06	1.182e+07	1.63252e+06	2.47972e+08	1.34248e+06	3.33881e+06	2.38386e+07	78942.5	6.8536e+07	1.0926e+08	786072	3.44701e+06	7.83694e+07	1.34092e+08	1.05287e+08
161 M	Negative	925686	35267.2	4.06229e+06	4.75414e+06	1.20901e+06	316278	1.7986e+06	7.70696e+06	1.90374e+06	104360	454963	1.95737e+06	4.39432e+07	3.14363e+07	8.65343e+07	29784.1	28445.7	680565	677688	13119.5	1.17633e+07	2.87171e+06	224442	434841	15035.1	2.06195e+07	2.46082e+07	4.50433e+06	270014	292847	1.0952e+08	869906	510542	4.41136e+06	8.31541e+06	1.2686e+06	2.42505e+08	1.07701e+06	4.57027e+06	19943459	78909	4.99601e+07	7.57175e+07	595288	3.12858e+06	6.8281e+07	1.05464e+08	1.71041e+08
153 A-M	Negative	492425	161542	4.37289e+06	3.05317e+06	4.80424e+06	944164	2.21435e+06	5.9224e+06	3.08859e+06	936269	390754	9.18826e+06	6.30187e+07	6.74772e+06	3.94837e+08	47864.9	186421	115202	202812	176416	1.31038e+07	1.64475e+06	130454	354847	258777	1.87073e+07	1.27589e+07	3.49981e+06	267957	240515	1.41383e+08	1.5538e+06	9.31056e+06	1.81279e+06	7.97207e+06	1.16284e+06	104696082	3.51468e+06	2.21354e+06	2.08626e+07	94531.1	4.57769e+07	5.34495e+07	571715	1.62117e+06	4.27596e+07	5.62082e+07	6.00876e+07
156 M	Negative	1.91613e+06	129748	3.54444e+06	7.15234e+06	1.31613e+06	468530	1.44809e+06	1.3475e+07	2.89091e+06	302694	400697	3.88509e+06	5.02848e+07	1.65151e+07	7.01686e+07	39594.7	240394	420143	414520	47156	1.41323e+07	3.19688e+06	302456	1.11914e+06	113391	1.61043e+07	2.0459e+07	6.35776e+06	766420	209379	9.03811e+07	733480	374356	2.17465e+06	1.64329e+07	1.63504e+06	1.93714e+08	1.61928e+06	3.03192e+06	4.43689e+07	84636.6	6.70464e+07	1.33928e+08	2.17945e+06	5.24896e+06	9.69543e+07	1.82406e+08	9.36677e+07
149 M	Negative	2.03277e+06	127849	2.78781e+06	5.07144e+06	1.12748e+06	238184	2.35536e+06	1.45271e+07	3.40699e+06	104175	675880	2.18186e+06	5.43809e+07	2.36065e+07	8.4104e+07	21775.4	47382.3	635793	838662	34291	1.29023e+07	2.12028e+06	219813	769566	58863.8	2.15039e+07	2.38932e+07	1.17554e+07	650579	260969	1.58651e+08	1.6808e+06	751145	6.13209e+06	1.71075e+07	1.95692e+06	2.05824e+08	848311	5.87654e+06	2.99143e+07	29348	3.37372e+07	9.09853e+07	1.15228e+06	5.16816e+06	6.68054e+07	1.13732e+08	1.12776e+08
176 M	Negative	816344	1.35059e+06	3.12409e+06	2.30276e+06	1.61206e+06	191034	1.16664e+06	1.12638e+07	6.186e+06	2.58742e+07	551019	851897	8.40707e+07	8.40707e+07	3.58321e+07	6.7703e+06	288135	529128	241907	5.33944e+06	1.19984e+08	1.08784e+06	99909.9	370455	6.19916e+06	1.21617e+07	1.85282e+07	7.13106e+06	844586	2.81501e+06	6.96236e+07	1.62846e+06	1.31081e+06	3.67299e+07	3.14643e+06	1.45888e+06	2.31873e+08	737716	3.63324e+06	2.49763e+07	131155	4.79121e+07	6.71749e+07	1.92675e+06	4.30003e+06	3.03634e+07	8.24383e+07	1.1019e+08
176 A-M	Negative	1.73445e+06	1.31383e+06	4.14692e+06	6.67079e+06	3.32378e+06	370884	1.52906e+06	1.2229e+07	4.92591e+06	563942	862776	1.75284e+06	4.47092e+07	2.82734e+07	5.30249e+07	2.22079e+07	122710	596635	361473	139122	2.40667e+07	3.03713e+06	270972	505426	267715	1.81968e+07	2.05447e+07	5.98577e+06	468797	551231	8.68748e+07	1.83007e+06	566498	6.14658e+06	1.35008e+07	1.33262e+06	2.70004e+08	1.3442e+06	3.03502e+06	2.03491e+07	32214.1	4.38287e+07	8.83423e+07	1.14383e+06	4.09313e+06	8.51138e+07	9.7832e+07	1.63379e+08
175 M	Negative	3.01766e+06	154357	5.88797e+06	5.3944e+06	2.73178e+06	295068	3.30676e+06	2.14872e+07	4.86979e+06	182291	700797	3.91564e+06	3.87028e+07	1.95456e+07	7.18396e+07	32597.4	117503	717486	1.19369e+06	25145.1	6.43287e+06	2.28524e+06	200491	911834	93520.2	1.86395e+07	3.30074e+07	1.46268e+07	739208	237936	1.06659e+08	2.07403e+06	657991	834175	2.32993e+07	2.7779e+06	1.73326e+08	977779	3.67303e+06	3.45607e+07	43391.5	4.91875e+07	1.43679e+08	1.67387e+06	7.27277e+06	7.15808e+07	1.19344e+08	9.64334e+07
185 M	Negative	1.01137e+06	564061	6.34474e+06	8.96232e+06	1.47384e+06	1.3566e+06	824394	8.61761e+06	2.86977e+06	1.02261e+06	976474	2.26935e+06	6.18744e+07	3.90378e+07	7.93682e+07	21012	108787	313060	424259	44262.1	7.97499e+06	3.83677e+06	342448	3.32112e+06	83013	1.79246e+07	1.55117e+07	8.70379e+06	425468	274638	9.99643e+07	735109	499025	1.34206e+06	1.12029e+07	1.56544e+06	100464625	4.39917e+06	3.80379e+06	3.58493e+07	252707	9.13467e+07	9.30702e+07	821438	3.37393e+06	124093597	1.93896e+08	1.55117e+08
195 A-M	Negative	267741	17431.1	1.45113e+07	7.40116e+06	1.09192e+07	943253	396877	1.57206e+07	4.25202e+06	290036	432776	101327	6.17942e+07	3.07157e+07	1.35439e+07	4.65572e+07	1.85889e+06	84529.4	120169	80658.5	9.55681e+06	2.84279e+06	356671	2930.13	175059	9.62019e+06	3.29782e+06	4.06991e+06	196503	128438	1.14035e+08	144933	619758	666637	6.70948e+06	2.01174e+06	3.31342e+08	3.2131e+06	3.76984e+06	1.92275e+07	890502	1.13914e+08	1.31811e+07	369823	1.1601e+06	8.5496e+07	7.67892e+07	5.97384e+07
207 M	Negative	628184	0	1.06114e+07	1.16997e+07	2.73508e+06	933223	2.12186e+06	8.13882e+06	3.77251e+06	120115	417848	600292	4.83407e+07	1.00672e+07	8.96071e+07	7036.32	156877	385597	644263	17547.3	8.56748e+06	5.01521e+06	556124	6413.69	102358	1.53275e+07	1.91367e+07	6.82436e+06	361657	98366.8	9.06954e+07	672998	353666	1.45644e+06	1.043e+07	1.57058e+06	1.72321e+08	3.17877e+06	3.11265e+06	3.46457e+07	912141	1.42392e+08	4.92476e+07	735236	3.54579e+06	1.44206e+08	9.16024e+07	5.55963e+07
191 M	Negative	161345	0	1.79629e+07	14220662	7.40468e+06	1.09061e+06	624864	8.61098e+06	2.85824e+06	442840	515193	515694	4.79012e+07	2.0489e+07	3.36805e+07	20183.6	81766.5	137880	320601	169077	7.83077e+06	5.67632e+06	546338	9239.33	372839	4.37238e+06	9.54281e+06	5.07064e+06	174232	31166	1.02913e+08	580526	289914	652608	7.79234e+06	1.83219e+06	2.6196e+08	3.73212e+06	3.48496e+06	2.86284e+07	1.85055e+06	1.21624e+08	4.25684e+07	324260	1.83927e+06	1.79629e+08	9.63637e+07	7.14775e+07
199 M	Negative	110206	0	6.14906e+06	3.85846e+06	5.69925e+06	994914	1.93516e+06	7.80458e+06	1.17641e+06	62582.9	279515	616585	2.11078e+07	1.80924e+08	2.27634e+08	56831.3	433419	88155.4	231692	42521.4	6.20819e+06	1.55876e+06	149540	13909.9	70231.1	1.71464e+07	7.8637e+06	3.23058e+06	162798	54312.1	1.24164e+08	398296	316624	888167	6.50381e+06	1.04296e+06	1.85654e+08	3.26389e+06	1.86242e+06	1.14112e+07	704993	9.16447e+07	4.03828e+07	233754	1.56857e+06	4.44624e+07	3.81951e+07	3.03906e+07
205 M	Negative	0	0	1.01951e+06	5.48144e+06	8.271e+07	1.51245e+06	125699	9.08547e+06	1.26454e+08	58396.8	454357	707381	1.21669e+07	1.59284e+07	2.72398e+08	618680	76829.7	172342	0	0	7.61911e+06	3.00525e+06	204667	279626	0	1.07465e+06	1.21149e+07	262202	1.37667e+06	1.5622e+06	1.70045e+07	480286	364744	881824	5.76505e+06	1.39187e+06	1.15285e+08	3.27947e+06	854943	1.76164e+07	690481	2.18506e+08	9.40975e+07	2.70059e+06	2.80295e+06	3.84624e+07	3.93135e+07	5.10976e+07
208 M	Negative	520085	0	2.28714e+07	8.80867e+06	9.57073e+06	545943	586202	1.43357e+07	6.06704e+06	97938.1	1.10787e+06	1.03182e+06	1.02921e+08	2.79165e+07	4.67518e+07	27120.1	98231.4	170722	1.54579e+06	0	1.90034e+07	3.70755e+06	374658	12715.6	29558.7	1.17974e+07	2.21987e+07	1.19896e+07	571869	136060	1.14357e+08	1.62714e+06	498754	1.28177e+06	1.84989e+07	1.91552e+06	2.10215e+08	1.72144e+06	6.16575e+06	3.58206e+07	3.03299e+06	1.10153e+08	6.05418e+07	1.76559e+06	4.53103e+06	1.1318e+08	7.71908e+07	5.43195e+07
195 M	Negative	273975	20931.4	1.46601e+07	5.85833e+06	4.9121e+06	686640	359608	5.3501e+07	2.69703e+06	110027	461730	203881	4.06102e+07	6.43697e+07	9.68915e+06	20742.7	1.52757e+06	135692	50564.3	12179.8	2.96572e+07	2.30516e+06	260593	9875.85	123592	4.91214e+06	3.59015e+06	1.21917e+06	260849	86103	9.09938e+07	174971	7.64605e+06	815634	6.44787e+06	1.43064e+06	2.89832e+08	2.31519e+06	3.20738e+06	1.38176e+07	671144	103631798	3.08368e+07	204982	714998	7.2795e+07	1.15427e+08	8.67811e+07
197 M	Negative	160210	9692.08	1.36645e+07	6.60115e+06	6.89638e+06	837712	134788	9.69066e+06	5.08792e+06	430149	550004	945508	4.18343e+07	2.4596e+07	8.36686e+07	28807	140482	92419.1	382285	171059	6.54303e+06	2.65067e+06	302556	6389.62	429591	3.59936e+06	6.8401e+06	4.20554e+06	288576	68908.6	9.16571e+07	639460	521884	1.25335e+06	1.21929e+07	2.02759e+06	2.83801e+08	3.00011e+06	5.2425e+06	3.16385e+07	839810	1.10367e+08	1.12469e+08	498358	1.76407e+06	8.18817e+07	9.58615e+07	9.23928e+07
206 M	Negative	191946	0	1.0999e+07	5.5328e+06	6.18499e+06	2.19682e+06	2.15851e+06	1.149e+07	2.99122e+06	171163	688565	625069	6.63867e+07	1.16864e+07	3.91839e+07	28972.7	182053	42245.5	273045	78109.9	1.4829e+07	2.17047e+06	243067	14629.3	164032	1.149e+07	5.67888e+06	3.7673e+06	207775	0	9.05452e+07	690521	677912	986743	7.74869e+06	1.35749e+06	3.14257e+08	6.94819e+06	4.50998e+06	1.8659e+07	1.56106e+06	1.22757e+08	3.92821e+07	311977	1.69744e+06	7.07078e+07	6.19675e+07	4.4487e+07
220 M	Negative	270079	0	9.70571e+06	8.64595e+06	9.97783e+06	873387	1.25397e+06	1.86858e+07	3.48246e+06	117329	639699	567452	4.73493e+07	5.69643e+07	2.48539e+07	7359.86	81424.1	216357	261503	106235	2.03185e+07	3.57152e+06	340052	18493.8	202595	1.74158e+07	1.15199e+07	2.21924e+06	313327	70251	1.47853e+08	498200	420773	905921	1.08849e+07	1.24519e+06	1.4876e+08	3.19098e+06	3.81725e+06	3.11127e+07	1.09982e+06	2.17698e+08	4.49909e+07	493062	1.98318e+06	1.03407e+08	9.97783e+07	5.41524e+07
231 M	Negative	105255	19439.2	7.13763e+06	4.75653e+06	3.80613e+06	789401	148345	9.60432e+06	2.08115e+06	79307	896311	704132	9.44687e+07	1.52724e+08	6.50784e+07	23110.1	185582	605757	652244	20581.7	169303	2.10557e+06	194383	25273.2	0	2.54778e+06	3.51633e+07	105563	487871	65720.8	100766600	362160	421780	2.26404e+06	1.60072e+07	1.51054e+06	2.17803e+08	2.90315e+06	6.56033e+06	4.0779e+07	622652	1.10738e+08	9.3419e+07	519981	3.99479e+06	5.40571e+07	100766600	3.87846e+07
211 M	Negative	57940.1	0	9.84732e+06	7.63768e+06	6.53285e+06	1.53727e+06	124103	1.20089e+07	2.04535e+06	205865	646777	475514	4.10705e+07	1.24412e+07	1.40745e+08	9460.57	359618	103970	114186	133975	2.25768e+07	3.23237e+06	364574	23774.7	241353	1.01355e+07	7.15732e+06	970815	110562	170625	1.28255e+08	621245	155985	2.84035e+06	3.27241e+06	623754	2.26248e+08	5.18785e+06	2.34944e+06	1.77252e+07	478913	1.57077e+08	4.29439e+07	176422	902338	9.22285e+07	9.94339e+07	5.71625e+07
221 M	Negative	115355	0	9.93735e+06	6.48422e+06	7.38605e+06	2.89261e+06	642508	1.52696e+07	2.87972e+06	125284	565544	1.35724e+06	7.17428e+07	5.78938e+06	264995960	24029.9	331737	185248	201579	79362.6	1.00989e+07	5.38207e+06	241955	59538	161355	3.0797e+06	1.34922e+07	3.90332e+06	257652	92029.3	2.70651e+07	853439	437062	1.02847e+06	6.73231e+06	1.32803e+06	236718952	9.12943e+06	3.48571e+06	2.69843e+07	1.26971e+06	2.27832e+08	3.68409e+07	311516	1.96257e+06	7.45705e+07	6.18863e+07	4.30618e+07
227 M	Negative	302626	0	8.33364e+06	1.03942e+07	8.25973e+06	2.01228e+06	1.18079e+06	1.21266e+07	3.61252e+06	64217.4	1.12787e+06	802646	6.37128e+07	5.84794e+06	4.36943e+07	15149.3	250049	110362	187195	2018.74	8.09424e+06	4.48841e+06	463117	25809.6	980349	3.7377e+06	9.55316e+06	3.19929e+06	316609	52673.2	3.90746e+07	1.00227e+06	262343	585304	8.90768e+06	2.09975e+06	2.57931e+08	6.92262e+06	4.00092e+06	1.41477e+07	0	2.23284e+08	3.81122e+07	392387	1.66924e+06	1.27041e+08	7.8053e+07	4.87952e+07
229 M	Negative	318739	0	1.82994e+07	4.19499e+06	5.82135e+06	714806	294282	2.26948e+07	3.39667e+06	41909.7	563867	3.44029e+06	5.24761e+07	3.30106e+07	46735111	13455.8	347792	298630	247304	1660.86	1.98243e+07	1.67974e+06	204188	8669.37	28106.9	2.17229e+06	1.3276e+07	4.47404e+06	242132	87686	1.18408e+08	707226	160985	586921	9.32908e+06	1.7682e+06	2.36815e+08	2.98106e+06	4.96987e+06	5.47187e+07	892700	9.23938e+07	7.36459e+07	506986	1.88173e+06	4.95159e+07	1.04055e+08	1.06746e+08
232 M	Negative	277566	0	1.09438e+07	9.30568e+06	7.91248e+06	1.35217e+06	1.62182e+06	1.20381e+07	3.18754e+06	126825	531256	1.26144e+06	6.01907e+07	8.84568e+06	7.68054e+07	17214	83687.8	67982.1	216967	121377	1.61172e+07	3.90611e+06	367691	35345.1	305193	9.1047e+06	1.39284e+07	3.49023e+06	347410	41313.3	7.47161e+07	763468	509259	1.27715e+06	1.44259e+07	1.90099e+06	163161659	4.6399e+06	5.29856e+06	2.26835e+07	1.87327e+06	1.26351e+08	7.34227e+07	616730	2.25413e+06	1.18392e+08	7.48156e+07	9.71011e+07
234 M	Negative	311818	102456	1.617e+07	9.02718e+06	4.60318e+06	1.34681e+06	1.18935e+06	1.03822e+07	4.56882e+06	417740	904030	2.73858e+06	6.21923e+07	1.31848e+07	6.77896e+07	18154.6	343625	51790.8	691406	120072	1.71651e+07	4.07057e+06	483869	18934	317691	9.48478e+06	8.43847e+06	9.50754e+06	299545	90056.4	7.56258e+07	2.48304e+06	762411	1.19178e+06	1.56725e+07	2.075e+06	2.41306e+08	4.96805e+06	4.61945e+06	2.81109e+07	2.32651e+06	120404270	5.88339e+07	494321	2.44723e+06	1.0411e+08	9.45323e+07	4.16688e+07
219 M	Negative	185196	48740.6	5.86445e+06	9.47405e+06	7.07413e+06	864478	103727	7.54784e+06	4.09176e+06	187583	511082	2.57805e+06	4.39336e+07	4.9135e+07	2.13631e+08	25968.2	653201	135074	354422	41635.4	8.91241e+06	3.44943e+06	416611	25122	74062.3	1.39324e+07	1.07744e+07	2.51918e+06	288443	89166.7	1.06815e+08	1.11048e+06	1.12432e+06	574394	1.12388e+07	1.50395e+06	2.04342e+08	2.65462e+06	5.45381e+06	3.05585e+07	74394.4	1.05886e+08	4.42122e+07	465918	2.41298e+06	107744116	7.217e+07	8.71241e+07
222 M	Negative	46083.8	16453.8	5.60087e+06	3.96036e+06	5.08247e+06	1.69908e+06	109445	4.04886e+06	2.76144e+06	145569	435040	537243	7.77223e+07	5.85203e+07	6.92317e+07	18073.3	223235	147921	419559	36278.3	1.2736e+07	1.54498e+06	189119	37830.9	11921.5	9.07849e+06	1.33238e+07	1.91544e+06	349996	78985.5	1.26054e+08	700337	408586	1.89995e+06	6.79254e+06	1.44325e+06	1.15604e+08	5.96296e+06	4.92052e+06	4.77437e+07	44293.5	1.3781e+08	6.34188e+07	409551	2.30027e+06	4.71559e+07	1.31279e+08	1.94632e+08
227A-M	Negative	239201	0	3.33272e+07	6.28607e+06	1.24487e+07	1.51764e+06	219311	1.28408e+07	4.10022e+06	73996.1	798198	708412	1.17626e+08	7.51453e+06	7.76328e+07	18644.9	300019	144796	220683	0	1.51933e+07	2.74241e+06	242080	33407.8	534672	2.34827e+06	8.97448e+06	2.86925e+06	293833	136448	3.32292e+07	1.17825e+06	289307	691123	7.71822e+06	3.78894e+06	1.93102e+08	5.32468e+06	4.44231e+06	2.68578e+07	307649	9.2434e+07	6.85169e+07	344556	2.44091e+06	8.04755e+07	8.73369e+07	1.66636e+08
235 M	Negative	370646	267823	9.13084e+06	9.57786e+06	8.06645e+06	783014	1.31917e+06	7.02876e+06	4.30767e+06	506881	698073	1.1873e+06	5.58097e+07	3.16968e+07	8.30339e+07	9853.22	151587	102479	192657	209553	1.70151e+07	4.17361e+06	397494	101981	416368	1.19592e+07	1.06952e+07	3.62556e+06	296546	170956	6.44631e+07	343689	583850	3.42225e+06	8.37381e+06	1.07767e+06	2.46963e+08	2.66285e+06	3.83045e+06	1.5265e+07	769374	1.45844e+08	8.80898e+07	728866	2.74132e+06	1.13758e+08	5.68792e+07	7.93392e+07
238 M	Negative	166165	18776.9	1.07944e+07	7.98258e+06	9.14644e+06	947615	177408	7.50474e+06	4.03078e+06	313847	735902	1.21036e+06	7.68795e+07	7.07631e+06	3.56793e+07	45170.3	112871	247117	179253	64170.1	1.24424e+07	3.21781e+06	349890	10513.3	94509.1	3.3945e+06	1.57385e+07	3.1276e+06	345504	81807.4	1.18656e+08	1.16162e+06	521643	1.13061e+06	8.81684e+06	1.2519e+06	1.65625e+08	3.24791e+06	3.89585e+06	2.99937e+07	335521	1.21128e+08	1.48321e+08	595524	2.2314e+06	9.88804e+07	1.52441e+08	7.35835e+07
244 M	Negative	235883	0	2.32478e+07	3.21908e+06	5.27023e+06	1.10061e+06	344557	1.26956e+07	3.28033e+06	569763	587113	806671	8.73853e+07	7.22165e+07	3.78395e+07	70029	1.13928e+06	160677	235168	250953	8.32633e+06	1.42748e+06	131080	18473	398203	1.0807e+06	6.72083e+06	4.82432e+06	193570	96386.4	3.02551e+07	1.06321e+06	591637	1.58828e+06	9.23316e+06	1.04275e+06	2.16814e+08	3.63876e+06	4.48681e+06	3.05024e+07	719300	1.22834e+08	7.78224e+07	385302	1.49761e+06	4.15492e+07	9.81023e+07	1.32727e+08
264 M	Negative	354295	24976.3	8.39186e+06	1.4333e+07	2.98086e+06	681850	1.3734e+06	5.83055e+06	2.61038e+06	41631.8	781664	930005	2.95572e+07	3.69093e+07	8.0948e+07	6548.22	109175	261031	958145	29280	7.64921e+06	5.871e+06	647970	15443.3	64317.3	1.463e+07	1.65609e+07	4.35289e+06	279450	122546	9.20876e+07	1.11405e+06	326786	2.7147e+06	8.39186e+06	1.54206e+06	2.42101e+08	2.33248e+06	5.37199e+06	2.16109e+07	983442	1.12139e+08	6.50554e+07	673943	3.65424e+06	1.80462e+08	7.12936e+07	6.58724e+07
248 M	Negative	795917	0	1.90306e+07	9.53514e+06	8.43538e+06	487266	373885	2.02066e+07	4.31476e+06	453327	1.0021e+06	922414	3.99856e+07	2.81182e+07	2.28794e+07	22720.1	87851.1	180541	419663	158426	4.44759e+07	4.05178e+06	392240	1915.13	1.35626e+06	7.01738e+06	6.4762e+06	6.99683e+06	285523	119294	143263757	957846	431465	1.91387e+06	1.21881e+07	1.95593e+06	2.40555e+08	1.59428e+06	5.94113e+06	2.74767e+07	1.2831e+06	9.62219e+07	7.49462e+07	187547	2.54554e+06	1.14397e+08	9.51528e+07	5.63433e+07
240 M	Negative	249621	110307	1.46235e+07	7.15291e+06	4.13523e+06	908876	111361	9.96688e+06	3.47114e+06	401495	918355	1.4646e+06	6.3886e+07	1.16825e+08	6.71539e+07	61546	117696	299576	719651	134344	3.30868e+07	2.81582e+06	315972	10748.6	260350	1.06204e+07	1.42967e+07	1.67711e+06	248409	76657.9	6.4703e+07	878427	412080	2.75239e+06	8.65974e+06	1.55874e+06	2.12409e+08	3.21022e+06	5.23396e+06	3.51292e+07	1.01694e+06	1.03754e+08	8.41466e+07	601158	2.83375e+06	8.57805e+07	1.29896e+08	6.61735e+07
266 M	Negative	227384	0	1.28494e+07	1.03283e+07	3.71423e+06	1.37315e+06	743358	1.52891e+07	2.44931e+06	0	1.1018e+06	789999	5.01776e+07	7.37193e+06	4.92831e+07	16484.8	342350	158775	452544	12055.8	7.86789e+06	4.13694e+06	415695	14618.1	14435.8	7.13464e+06	1.08163e+07	4.65882e+06	201534	66570.3	8.94577e+07	1.57965e+06	466150	1.48567e+06	7.59351e+06	1.74689e+06	266746630	4.35491e+06	2.57281e+06	1.82982e+07	1.5121e+06	1.39879e+08	6.98583e+07	402331	1.99799e+06	1.21175e+08	1.11416e+08	5.44879e+07
276A- M	Negative	3.53507e+06	90247.4	8.79241e+06	1.33128e+07	4.01603e+06	791997	1.4591e+06	1.22186e+07	3.28027e+06	55962.3	972146	1.77255e+06	4.75066e+07	1.68689e+07	6.5105e+07	64082.6	86553.8	178056	755959	8620.19	6.69542e+06	5.26294e+06	611172	831520	72510.6	1.11244e+07	1.03949e+07	9.11835e+06	410523	163405	7.54999e+07	1.19714e+06	304308	5.79715e+06	1.76896e+07	1.71504e+06	1.77808e+08	3.0373e+06	3.83749e+06	2.21576e+07	871101	7.97855e+07	9.48308e+07	598863	4.83813e+06	1.61395e+08	1.2401e+08	9.11835e+07
279 M	Negative	1.05855e+06	403999	4.66405e+06	3.83001e+06	3.75885e+06	744248	1.45405e+06	3.1127e+07	8.39706e+06	21954.9	1.4906e+06	1.69693e+06	5.82115e+07	2.20314e+07	1.57656e+08	34523.8	71858.4	78194.6	437610	0	2.15854e+06	1.57845e+06	168929	923876	0	1.66539e+07	2.48612e+07	1.48e+07	2.14439e+06	310778	2.28399e+08	5.83604e+06	2.43397e+06	3.69968e+06	3.92119e+07	3.19305e+06	9.19661e+07	2.67939e+06	8.69107e+06	1.69269e+07	755947	6.50837e+07	6.30624e+07	2.22308e+06	1.023e+07	4.81053e+07	4.16374e+07	7.43813e+07
285 M	Negative	2.55662e+06	660082	1.5215e+07	3.49376e+06	7.50082e+06	286356	109098	4.16815e+07	4.12735e+07	34459.6	1.90052e+06	1.01989e+06	4.43764e+07	3.87356e+07	8.18386e+07	96134.3	62847.7	355365	967531	0	1.73274e+07	2.01874e+06	126882	7285.9	16466.3	6.17301e+06	3.21794e+07	1.90023e+07	1.86892e+06	1.01793e+06	7.22808e+07	5.4089e+06	2.25493e+06	2.11233e+07	4.83464e+07	5.92548e+06	1.70845e+08	940216	1.13204e+07	1.55477e+07	256241	5.48668e+07	1.02746e+08	4.30673e+06	1.53189e+07	5.76468e+07	5.92415e+07	1.14096e+08
268 M	Negative	189065	0	8.94273e+06	1.01912e+07	8.32585e+06	1.08187e+06	22926.1	9.44323e+06	5.00413e+06	30818.7	951962	2.63113e+06	1.00042e+08	2.14109e+07	8.9664e+07	31075.3	142466	285861	444099	34245.5	2.04759e+07	3.77044e+06	457406	30627.6	84661.9	6.43905e+06	1.43986e+07	1.02069e+06	289231	32560.8	4.23543e+07	414512	557662	1.03821e+06	7.67502e+06	1.39834e+06	2.06629e+08	3.51624e+06	5.02104e+06	3.50615e+07	1.04864e+06	1.50531e+08	5.76879e+07	447260	3.02542e+06	1.34636e+08	1.81385e+08	5.13301e+07
272 M	Negative	207393	0	1.72657e+07	8.80212e+06	4.59821e+06	464805	239825	1.13412e+07	2.99737e+06	65273.5	527926	537743	5.98375e+07	2.52215e+07	3.29233e+07	14537.1	243373	208190	306041	41074	1.20183e+07	4.19326e+06	357628	6959.58	156319	5.49182e+06	8.71749e+06	5.40848e+06	256234	39077.4	1.31185e+08	939078	444567	1.91514e+06	1.10873e+07	1.79207e+06	2.01433e+08	1.60678e+06	5.61664e+06	3.04689e+07	498902	1.00717e+08	4.90888e+07	426274	2.3609e+06	1.21876e+08	1.03256e+08	132878216
283 M	Negative	1.06002e+06	27555.1	1.01014e+07	7.15291e+06	4.85649e+06	734128	1.07391e+06	1.56353e+07	4.37805e+06	12448.5	940686	1.10345e+06	6.68451e+07	1.47569e+07	1.15947e+08	14997	144919	103975	890976	0	2.26623e+07	2.9151e+06	275221	93887.4	0	1.05406e+07	1.27366e+07	5.48111e+06	358898	211197	9.83791e+07	2.50207e+06	412069	3.1515e+06	2.24867e+07	1.93401e+06	1.76555e+08	2.50591e+06	4.84788e+06	3.77706e+07	902827	1.30879e+08	6.67573e+07	507228	5.43234e+06	7.85276e+07	8.58182e+07	8.64331e+07
289 M	Negative	2.5699e+06	108217	8.95711e+06	3.76441e+06	1.34902e+06	1.06114e+06	3.38194e+06	1.78515e+07	8.2617e+06	33430.7	597579	3.74984e+06	8.85615e+07	2.85558e+07	1.2387e+08	74758.8	139963	395756	1.00678e+06	21864.7	1.04723e+07	1.69799e+06	164164	471255	41775.6	2.4311e+07	2.72052e+07	1.06903e+07	930220	276624	1.85227e+08	1.61939e+06	1.43723e+06	2.57986e+06	2.31533e+07	2.76581e+06	4.26407e+07	3.40715e+06	6.77537e+06	2.25745e+07	89476.7	6.30928e+07	8.60532e+07	1.55138e+06	5.47794e+06	5.74974e+07	6.61799e+07	1.03418e+08
290 M	Negative	492736	16859.6	7.15371e+06	7.38987e+06	1.63235e+06	1.22959e+06	1.8291e+06	9.57085e+06	1.56184e+06	85516.3	881159	946146	6.58949e+07	1.46527e+07	1.16036e+08	494185	56170.1	53291.7	323206	6638.27	6.7782e+06	3.27381e+06	320269	1.74104e+06	0	2.29531e+07	1.25353e+07	6.08719e+06	504012	232419	1.34669e+08	615862	708293	3.76513e+06	8.33702e+06	1.9019e+06	1.88029e+08	4.08099e+06	5.20514e+06	2.51552e+07	1.54415e+06	1.7109e+08	4.68379e+07	551715	3.64485e+06	9.40146e+07	3.65894e+07	139751366
293 M	Negative	733237	751181	6.79083e+06	5.77988e+06	1.22866e+06	294928	2.45147e+06	7.77316e+06	1.48543e+06	36240.3	1.12241e+06	2.17924e+06	6.78925e+07	6.77245e+07	8.30171e+07	19321.8	32083	153081	1.3146e+06	14035	7.63791e+07	2.29004e+06	245766	887029	78229	1.34441e+07	2.36952e+07	6.75932e+06	449966	312848	7.55389e+07	1.14858e+06	601535	2.4681e+06	8.73864e+06	2.35794e+06	1.94939e+08	1.13035e+06	4.54896e+06	2.02501e+07	1.0074e+06	5.57929e+07	9.83097e+07	537213	4.80154e+06	6.87328e+07	4.03322e+07	1.46204e+08
297 M	Negative	1.70188e+06	2.37249e+06	6.49445e+06	8.16337e+06	1.2903e+06	1.41205e+06	1.38571e+06	15167387	2.00167e+06	163252	768029	3.75761e+06	8.24484e+07	1.48757e+07	7.34063e+07	11247	18542.8	82964.8	528556	16775.5	7.76772e+06	3.48523e+06	359254	1.4411e+06	46769.8	1.78897e+07	2.0126e+07	6.58741e+06	565520	245995	7.69064e+07	1.83765e+06	249719	4.58113e+06	1.92509e+07	1.63348e+06	1.54591e+08	4.76008e+06	4.93713e+06	2.08065e+07	1.58735e+06	9.07126e+07	1.14728e+08	1.07474e+06	4.97854e+06	100143645	4.25854e+07	2.38206e+08
313 M	Negative	1.43772e+06	34663.4	5.11521e+06	3.67257e+06	2.47941e+06	991656	1.72899e+06	6.99463e+06	1.25938e+06	106592	580605	1.02189e+06	4.55244e+07	4.91995e+07	2.88084e+08	32117.3	1.59035e+06	61301.5	156773	1076.42	6.63897e+06	1.63871e+06	141963	442284	74474.1	4.47143e+06	7.8245e+06	1.67822e+06	276051	105469	3.62179e+07	1.00377e+06	791505	1.9192e+06	8.95075e+06	1.0933e+06	1.95612e+08	3.0676e+06	2.53933e+06	1.2211e+07	707387	1.13218e+08	6.75752e+07	367382	2.41161e+06	4.11379e+07	3.37876e+07	1.42856e+08
319 M	Negative	1.07443e+06	2.86018e+06	6.29953e+06	7.11426e+06	895881	346079	1.9638e+06	5.56217e+06	1.01792e+06	286525	384131	1.41515e+06	3.09764e+07	2.30838e+07	1.5955e+08	21861.1	148468	162662	467155	54091.2	2.14713e+07	3.20372e+06	300439	1.18266e+06	268581	2.64785e+07	1.96891e+07	4.15118e+06	327416	178830	113721663	641719	1.94623e+06	5.23556e+06	5.73292e+06	1.77931e+06	161247134	1.15887e+06	5.87959e+06	1.73129e+07	1.33019e+06	8.74129e+07	5.88976e+07	535576	2.58841e+06	8.99589e+07	3.81052e+07	2.09621e+08
321 M	Negative	1.91837e+06	1.35646e+06	8.43978e+06	9.39146e+06	1.58276e+06	579774	1.76199e+06	1.3818e+07	2.9194e+06	76508.2	647530	701259	3.53398e+07	7.10465e+07	8.91444e+07	19532.3	46768.5	148766	413757	26663.1	1.61414e+07	4.13941e+06	425706	644735	98015.8	1.33289e+07	2.29892e+07	5.66323e+06	652312	424110	7.34922e+07	481185	1.77192e+06	6.93421e+06	1.76088e+07	1.5373e+06	1.54077e+08	1.97441e+06	4.9961e+06	1.04347e+07	925187	1.28397e+08	5.82068e+07	1.41544e+06	4.58545e+06	1.0871e+08	3.38724e+07	2.25001e+08
300 M	Negative	620888	2.72996e+06	4.84035e+06	4.98017e+06	872920	410100	2.13425e+06	6.06348e+06	1.82042e+06	407092	510374	1.34004e+06	5.66641e+07	7.58299e+07	1.23143e+08	45453.1	64434	157249	408964	12473.1	2.69432e+07	2.12102e+06	140419	1.11285e+06	33725	1.97213e+07	1.8888e+07	2.17853e+06	307805	401767	7.34226e+07	828464	1.55662e+06	3.66018e+06	6.89802e+06	1.71645e+06	1.74066e+08	1.47108e+06	4.64896e+06	2.32397e+07	715427	7.42559e+07	8.89774e+07	707626	3.15316e+06	4.69423e+07	5.93491e+07	1.8888e+08
308 M	Negative	1.71778e+06	147676	1.09535e+07	8.62401e+06	5.44509e+06	1.21204e+06	1.52859e+06	1.34729e+07	3.68339e+06	566848	661036	1.68257e+06	5.7068e+07	4.58953e+07	9.77056e+07	16523.2	61095.2	199216	832012	138162	1.85115e+07	3.77238e+06	423786	544514	328225	1.61017e+07	1.94973e+07	6.52451e+06	377394	213195	9.66102e+07	1.2618e+06	1.24641e+06	2.45189e+06	1.70875e+07	2.07111e+06	1.25966e+08	4.2474e+06	5.82814e+06	1.68685e+07	1.17012e+06	1.27061e+08	9.49672e+07	1.07677e+06	4.50092e+06	1.01211e+08	6.45164e+07	7.97418e+07
317 M	Negative	286295	274198	4.46212e+06	3.77648e+06	1.18597e+06	357058	1.92822e+06	8.27962e+06	1.92029e+06	155375	1.04017e+06	2.32182e+06	9.85736e+07	1.21129e+08	7.37631e+07	93789.6	85508.6	170607	958041	23129.5	4.7449e+07	1.81762e+06	196198	713673	49383	1.29482e+07	3.0491e+07	3.5284e+06	456959	349928	7.76058e+07	926043	1.34282e+06	4.94498e+06	1.0108e+07	1.85405e+06	1.31153e+08	1.19268e+06	5.66088e+06	2.53952e+07	492888	7.33454e+07	1.10269e+08	939763	4.35556e+06	4.61124e+07	5.58862e+07	1.36165e+08
296 M	Negative	3.78215e+06	619492	7.58066e+06	8.53153e+06	2.66614e+06	1.71855e+06	1.80335e+06	1.86128e+07	2.73034e+06	89111.4	827806	1.59636e+06	5.28061e+07	4.09901e+07	8.20848e+07	8774.92	40540.9	216433	848241	4119.11	2.41549e+07	3.75827e+06	372444	954077	22708.2	1.74626e+07	4.06764e+07	4.53102e+06	406672	306395	9.08684e+07	778512	831667	5.83992e+06	2.25864e+07	1.69159e+06	1.21297e+08	6.06223e+06	5.41716e+06	1.57896e+07	1.60908e+06	1.12932e+08	1.12932e+08	753784	3.90924e+06	1.05612e+08	3.91079e+07	1.43256e+08
312 M	Negative	884111	123574	7.18636e+06	9.87139e+06	1.70446e+06	933523	1.06442e+06	9.42939e+06	1.23352e+06	112769	553417	1.64022e+06	4.11063e+07	1.90061e+08	3.11612e+07	8644.84	38927.2	41451.2	419763	26036	1.47334e+07	4.31018e+06	392014	2.6035e+06	31873.5	1.63541e+07	9.87139e+06	4.34702e+06	389389	160721	1.13447e+08	642509	537371	3.26017e+06	1.18604e+07	1.68235e+06	1.58384e+08	3.0942e+06	6.61984e+06	1.78274e+07	1.21467e+06	9.57672e+07	6.83631e+07	388117	3.70928e+06	1.17131e+08	6.71107e+07	1.51018e+08
315 M	Negative	620065	490332	6.71964e+06	1.054e+07	2.19384e+06	1.33355e+06	1.93951e+06	9.49472e+06	1.55991e+06	290802	617870	3.5165e+06	6.97732e+07	1.55051e+07	7.50867e+07	9903.13	44538.5	101565	514480	77930.8	2.68291e+07	4.47731e+06	426452	1.39047e+06	197731	6.71621e+06	2.49999e+07	2.53143e+06	456656	543192	3.54528e+07	933409	451536	1.30661e+07	8.30841e+06	1.92855e+06	1.33275e+08	4.46197e+06	3.74681e+06	1.56794e+07	1.37589e+06	1.21951e+08	9.75605e+07	787123	3.17086e+06	1.35888e+08	4.87802e+07	1.71602e+08
323 M	Negative	888978	103734	7.49435e+06	7.77064e+06	1.20555e+06	688856	2.91321e+06	7.71226e+06	1.62904e+06	515443	819422	2.79226e+06	6.86895e+07	2.43802e+07	9.43848e+07	25550.4	32819.9	75126.3	564904	10714.9	1.42639e+07	3.39686e+06	362999	1.46701e+06	10903.7	1.76023e+07	1.2443e+07	6.00616e+06	352467	303599	8.27511e+07	1.00426e+06	897533	3.56789e+06	8.83487e+06	1.59345e+06	1.93221e+08	2.40616e+06	3.89702e+06	1.14314e+07	1.24616e+06	9.23616e+07	7.95139e+07	603609	2.10525e+06	8.0829e+07	3.76325e+07	2.21546e+08
347 A- M	Negative	2.50596e+06	216963	6.76502e+06	2.81761e+06	4.398e+06	1.07665e+06	3.33961e+06	2.05823e+07	1.55461e+06	143355	653923	3.17676e+06	6.25852e+07	6.72418e+07	2.82192e+08	22340.1	321331	77406	260126	27197.4	4.24745e+06	2.04713e+06	107790	555488	66226.8	1.44356e+07	1.03377e+07	4.07342e+06	538845	162510	1.07103e+08	1.47616e+06	989491	1.13277e+06	2.44939e+07	1.84301e+06	1.01515e+08	3.63302e+06	4.02813e+06	9.14347e+06	1.01061e+06	7.96285e+07	100583374	909720	2.86193e+06	3.4366e+07	1.78815e+07	9.49954e+07
325 M	Negative	2.77094e+06	154474	7.42384e+06	8.50102e+06	1.5597e+06	653006	4.01491e+06	1.05366e+07	1.92214e+06	451361	842767	2.65164e+06	5.29646e+07	4.44022e+07	1.09721e+08	35540.1	51459.4	143054	997389	13785.7	1.09828e+07	3.56773e+06	327559	912319	25921.4	2.37301e+07	1.62686e+07	9.29189e+06	527304	239095	1.24767e+08	877638	922123	2.33096e+06	1.32106e+07	2.49377e+06	1.43115e+08	2.28591e+06	5.27202e+06	2.00605e+07	1.12317e+06	6.27502e+07	8.53795e+07	1.06297e+06	5.31235e+06	1.02749e+08	24830987	1.57793e+08
340 M	Negative	576918	0	1.12121e+07	7.35142e+06	5.55104e+06	462551	1.43762e+06	1.06371e+07	3.4869e+06	776733	1.50394e+06	1.78095e+06	4.77234e+07	3.85237e+07	8.86429e+07	11910.9	102921	139365	525874	63123.9	1.80161e+07	3.14601e+06	277366	271683	65906.6	1.29371e+07	1.62911e+07	4.98772e+06	386007	167711	7.46517e+07	1.2631e+06	489928	2.86496e+06	9.25535e+06	1.80764e+06	1.70578e+08	1.55877e+06	6.75301e+06	2.01243e+07	1.14898e+06	1.42787e+08	1.1308e+08	652385	5.27577e+06	1.0158e+08	9.96633e+07	5.89355e+07
346 M	Negative	1.42357e+06	165010	5.52753e+06	4.88173e+06	1.02169e+06	402326	3.42131e+06	1.56668e+07	2.21238e+06	674430	1.25904e+06	1.35106e+06	3.13336e+07	1.45232e+08	6.44969e+07	18841.6	95077.5	315534	392806	35587.3	2.63019e+07	1.99779e+06	218528	1.24249e+06	102022	8.49982e+06	2.33287e+07	1.79539e+07	817891	212515	6.06088e+07	1.19081e+06	1.22234e+06	2.65428e+06	1.94406e+07	3.15515e+06	1.36084e+08	1.38719e+06	8.1134e+06	2.11559e+07	159216	4.43702e+07	9.48013e+07	1.06352e+06	7.04903e+06	6.31247e+07	9.44583e+07	2.20708e+08
326 M	Negative	1.85039e+06	16233.3	8.46193e+06	8.73221e+06	1.31496e+06	761139	2.75126e+06	1.46263e+07	1.97039e+06	329469	1.0566e+06	4.20267e+06	6.20999e+07	3.14838e+07	1.03872e+08	42140.2	108424	88310.6	318645	35909.6	2.02042e+07	3.87298e+06	330564	1.70391e+06	145161	2.37988e+07	1.42545e+07	4.67871e+06	671710	245728	123951966	792366	926942	3.69151e+06	1.89647e+07	1.21549e+06	1.14903e+08	2.36971e+06	2.45588e+06	1.36347e+07	1.35905e+06	6.9785e+07	1.41305e+08	633065	3.89784e+06	1.07962e+08	3.90449e+07	135107643
332 M	Negative	1.41404e+06	1.17849e+06	7.29376e+06	3.3673e+06	1.55789e+06	626477	2.5703e+06	7.86833e+06	2.18774e+06	390888	1.00485e+06	1.61852e+06	9.27603e+07	1.33287e+08	8.24936e+07	19846.2	125697	110970	342006	72764.2	2.72877e+07	1.4356e+06	143752	984447	123308	1.53099e+07	1.81918e+07	5.21097e+06	323320	407017	7.70901e+07	1.65065e+06	1.09164e+06	5.79043e+06	1.00866e+07	1.73908e+06	1.32386e+08	2.22445e+06	4.69088e+06	1.42292e+07	1.11078e+06	106269049	9.90644e+07	749789	2.61142e+06	4.20573e+07	3.47626e+07	1.26082e+08
341 M	Negative	1.04212e+06	101616	7.74577e+06	4.00022e+06	711111	1.09359e+06	3.29475e+06	6.92709e+06	1.67399e+06	1.03757e+06	572570	743999	6.02818e+07	2.6827e+07	2.44073e+08	37010.6	114720	124669	325899	43947.6	3.4086e+07	1.70946e+06	147636	619530	66809.9	1.68326e+07	1.05204e+07	7.63341e+06	340823	309604	7.03814e+07	475933	1.53299e+06	3.55565e+06	8.12918e+06	1.26383e+06	1.5465e+08	3.66357e+06	3.94257e+06	1.87263e+07	1.0141e+06	1.02258e+08	3.90306e+07	627322	2.86529e+06	4.66053e+07	2.50385e+07	1.24141e+08
344 M	Negative	1.06455e+06	204164	7.98233e+06	3.40928e+06	2.24642e+06	3.00529e+06	2.50458e+06	8.05665e+06	1.65463e+06	372414	551036	841206	5.50005e+07	5.28381e+07	111881454	13123.1	149097	43342.6	261330	67869.1	1.84705e+06	1.44649e+06	128410	822122	78569.1	2.31284e+07	9.68386e+06	4.51615e+06	1.15568e+06	401042	1.28805e+08	377136	797417	4.83967e+06	9.34164e+06	880074	171112812	9.49582e+06	2.36899e+06	8.8355e+06	828026	2.17182e+08	4.74791e+07	625935	2.28598e+06	4.12739e+07	2.0778e+07	138206502
347 M	Negative	955162	0	7.71596e+06	3.31907e+06	5.21979e+06	1.21599e+06	3.43227e+06	1.05809e+07	2.41197e+06	164815	638083	1.76501e+06	6.62172e+07	6.25521e+07	2.6267e+08	58837.1	299528	51628.8	210568	35511.5	9.34876e+06	1.43724e+06	120402	660712	121789	1.60045e+07	5.92025e+06	6.03431e+06	359619	305012	1.16063e+08	1.00945e+06	999112	3.79984e+06	1.31946e+07	2.10549e+06	9.98145e+07	4.34827e+06	3.62023e+06	8.03931e+06	867808	7.79457e+07	6.63394e+07	795271	2.01319e+06	4.20272e+07	2.2724e+07	1.02258e+08
352 M	Negative	1.82193e+06	123302	8.78861e+06	9.47669e+06	1.95077e+06	551032	3.06772e+06	1.03996e+07	1.6697e+06	88365.7	1.04038e+06	3.05644e+06	4.03411e+07	3.81927e+07	8.95142e+07	567013	27601.4	167151	947235	22278.6	8.81304e+06	4.12361e+06	402725	1.18436e+06	128089	2.85252e+07	1.46803e+07	1.00862e+07	496979	187696	1.36062e+08	1.27961e+06	912209	2.80695e+06	1.2532e+07	2.61012e+06	1.15652e+08	1.81671e+06	4.65053e+06	1.88577e+07	1.67901e+06	7.16114e+07	9.22593e+07	1.02134e+06	3.66668e+06	1.16727e+08	2.23189e+07	1.90964e+08
353 M	Negative	551691	0	9.31688e+06	7.49717e+06	2.45944e+06	638879	2.54868e+06	1.44848e+07	2.26978e+06	123598	510262	825696	2.76595e+07	3.55934e+07	9.7536e+07	12178	214227	191844	540153	10892.1	2.86785e+07	3.19194e+06	316514	4521.05	75744.4	2.03079e+07	1.6159e+07	3.81527e+06	406563	114520	9.46245e+07	210390	291052	1.23775e+06	9.24409e+06	1.65653e+06	1.78331e+08	2.11386e+06	5.25534e+06	3.86505e+07	1.17581e+06	1.41209e+08	4.83313e+07	683865	3.76878e+06	8.95293e+07	7.49717e+07	5.77937e+07
368 M	Negative	82434.3	0	7.31113e+06	4.90289e+06	1.67297e+06	3.64841e+06	2.67726e+06	7.933e+06	1.86231e+06	255983	687998	2.24399e+06	3.58914e+07	1.25259e+07	4.60887e+08	42810.5	162699	186956	441033	19620	3.10333e+06	2.27892e+06	169713	677748	37830.8	7.3723e+06	8.83234e+06	5.05406e+06	187101	695024	7.93305e+07	909667	1.15478e+06	7.75012e+06	7.59154e+06	1.45188e+06	51629030	1.17229e+07	3.01381e+06	1.38909e+07	928347	1.54164e+08	4.27967e+07	293833	1.47867e+06	5.73299e+07	2.81029e+07	3.10738e+07
380 M	Negative	550297	593435	5.57765e+06	4.84488e+06	742101	814383	964372	9.17971e+06	1.40268e+06	189893	1.12319e+06	1.17093e+06	8.71196e+07	7.36716e+07	9.00431e+07	8237.19	42446.5	347614	747120	83990.5	1.47343e+08	2.11185e+06	216919	248869	238070	6.37318e+06	2.32709e+07	136014	849611	258340	3.84729e+07	868317	225835	2.47018e+06	1.11677e+07	1.70741e+06	1.4325e+08	2.72729e+06	3.03623e+06	1.67223e+07	872432	1.26294e+08	9.29665e+07	420159	3.14946e+06	6.02236e+07	5.16286e+07	6.43165e+07
360 M	Negative	749678	214396	8.33712e+06	6.01525e+06	2.54361e+06	717596	1.1427e+06	1.00045e+07	6.90233e+06	3.13021e+07	766229	971445	6.50296e+07	1.75838e+08	4.2292e+07	7126.49	138014	169335	632512	3.09754e+06	6.14673e+07	2.56377e+06	273657	360697	3.56975e+06	9.85296e+06	1.70532e+07	3.50281e+06	343833	355153	4.30499e+07	260036	307919	9.62559e+06	9.92876e+06	1.54875e+06	175079593	2.5314e+06	6.12083e+06	2.14491e+07	975475	1.27331e+08	7.29119e+07	1.02344e+06	5.80701e+06	6.96529e+07	6.15431e+07	5.46461e+07
363 M	Negative	2.22418e+06	173057	1.0036e+07	9.32592e+06	918315	629445	2.13682e+06	1.02394e+07	2.08842e+06	839487	831241	2.01965e+06	8.22901e+07	3.11646e+07	8.28052e+07	52482.5	38977.7	138854	841518	69208.2	1.57111e+07	4.02336e+06	423922	1.88516e+06	82139.4	21892517	1.54535e+07	8.71937e+06	462150	155015	1.08561e+08	910880	1.26878e+06	1.72886e+06	1.31355e+07	2.19927e+06	1.66126e+08	1.9852e+06	6.03949e+06	2.69149e+07	2.06856e+06	9.22061e+07	8.19038e+07	899307	3.40268e+06	1.09334e+08	3.88914e+07	1.44233e+08
366 M	Negative	2.68683e+06	124227	1.07549e+07	3.33522e+06	986545	598345	3.52327e+06	1.11991e+07	4.65127e+06	178771	665512	1.71767e+06	1.17146e+08	2.37235e+07	117698145	19089.7	163009	230256	336578	10772.9	3.18153e+07	1.39877e+06	123530	683942	80108.7	1.08609e+07	1.39433e+07	6.58356e+06	571161	544894	7.65038e+07	333603	1.59418e+06	2.24396e+06	1.21579e+07	1.4144e+06	1.07951e+08	1.97612e+06	3.67572e+06	2.02294e+07	177252	1.11997e+08	8.80897e+07	831901	2.04826e+06	4.24817e+07	4.39529e+07	1.16595e+08
372 M	Negative	960507	300079	8.66367e+06	1.02919e+07	3.37614e+06	728326	2.74936e+06	1.19998e+07	1.84186e+06	554680	668314	1.13888e+06	3.08731e+07	3.47177e+07	1.11143e+08	14443.9	49607.6	85804.4	381037	137589	8.21374e+06	4.79969e+06	465681	1.29796e+06	159527	2.03879e+07	1.75919e+07	4.18427e+06	389611	188192	1.00425e+08	987585	982434	3.49078e+06	1.59608e+07	1.73154e+06	145628060	2.40203e+06	4.60486e+06	1.24658e+07	1.14325e+06	1.66599e+08	7.1183e+07	617460	3.75416e+06	1.28153e+08	3.02906e+07	9.25029e+07
378 M	Negative	700124	135454	8.58777e+06	8.83313e+06	4.13001e+06	703189	974165	1.13686e+07	2.86468e+06	82520.9	842814	2.89518e+06	5.49617e+07	8.91492e+07	4.78461e+07	10464.9	92203.7	160600	503254	44241.6	1.1205e+07	3.83803e+06	342415	350844	95751.3	1.63577e+07	1.96292e+07	5.14383e+06	364555	135121	9.40565e+07	977381	356491	3.79159e+06	1.16957e+07	1.55645e+06	1.52126e+08	2.44471e+06	6.26188e+06	1.78298e+07	1.01276e+06	1.14504e+08	1.44765e+08	717058	5.90553e+06	1.1205e+08	6.46945e+07	8.91492e+07
373 M	Negative	1.38512e+06	49142.7	7.47236e+06	6.3201e+06	1.3263e+06	380897	3.06516e+06	1.079e+07	2.04105e+06	571306	882843	2.08424e+06	4.81674e+07	2.62429e+07	7.88395e+07	23710.4	19274.3	151230	785813	28642	7.34403e+06	2.66399e+06	266668	1.80137e+06	104009	2.05957e+07	2.13708e+07	1.16266e+07	368268	168158	1.15159e+08	922202	933294	916199	1.37305e+07	2.23638e+06	1.55021e+08	1.40104e+06	5.91003e+06	2.24781e+07	910873	1.001e+08	9.15734e+07	732874	5.93698e+06	7.81751e+07	5.54755e+07	1.62773e+08
382 M	Negative	2.81674e+06	723595	7.02744e+06	8.18595e+06	1.35525e+06	1.65372e+06	2.44958e+06	1.08378e+07	1.73447e+06	78247.3	599886	1.34157e+06	4.00793e+07	1.68701e+07	1.1349e+08	25236.3	64850.1	97885.1	390760	12345.6	1.04288e+07	3.64538e+06	353614	1.18174e+06	42356	2.33114e+07	1.38028e+07	5.85938e+06	449994	226246	1.10423e+08	844500	910979	3.84445e+06	1.39051e+07	1.63773e+06	1.55409e+08	5.82765e+06	5.37585e+06	1.67679e+07	1.60318e+06	1.63589e+08	8.22034e+07	831299	3.0976e+06	9.83578e+07	3.38425e+07	164611341
398 M	Negative	2.14472e+06	335698	6.03599e+06	3.3285e+06	4.29907e+06	445117	1.46908e+06	5.75321e+06	3.98094e+06	107161	923017	2.80812e+06	9.35153e+07	3.66558e+07	6.24958e+07	1.64857e+07	98457.6	521354	768824	10092	1.87497e+07	1.43284e+06	67912.2	2.36504e+06	0	1.48316e+07	3.59676e+07	5.54073e+06	846830	648693	8.21447e+07	1.5347e+06	1.91705e+06	5.60231e+06	2.60512e+07	1.84642e+06	2.27063e+08	1.37739e+06	4.13105e+06	1.07114e+07	143650	7.44558e+07	1.56077e+08	3.12099e+06	6.27729e+06	3.66967e+07	1.03203e+08	1.29225e+08
403 M	Negative	732419	225436	5.28357e+06	8.15167e+06	6.55238e+06	361180	1.19207e+06	5.87206e+06	3.08058e+06	152927	837472	1.99444e+06	5.21004e+07	5.33363e+07	6.17873e+07	51207.4	44715	135616	1.19897e+06	11669.3	1.10288e+07	3.41016e+06	333268	3.18066e+06	4258.23	2.77569e+07	2.15153e+07	8.37505e+06	752928	493414	1.77872e+08	1.45405e+06	995451	8.04109e+06	2.20103e+07	2.05246e+06	2.16352e+08	1.05159e+06	3.9828e+06	1.1796e+07	42553.9	3.79375e+07	8.17512e+07	1.774e+06	6.56521e+06	8.50275e+07	9.64318e+07	1.47117e+08
387 M	Negative	2.19075e+06	167630	6.46655e+06	5.26938e+06	3.94748e+06	2.07755e+06	1.92269e+06	1.18935e+07	2.67837e+06	337877	590537	1.04982e+06	7.9797e+07	3.48339e+07	2.57569e+08	55450	412105	329361	215914	126642	5.63333e+07	2.61986e+06	220881	2.43811e+06	445986	1.6456e+07	2.38089e+07	7.74235e+06	721017	479417	9.15584e+07	1199127	1.14652e+06	3.57106e+06	2.12944e+07	1.22639e+06	1.59187e+08	6.99978e+06	2.10871e+06	7.53332e+06	19528.6	8.70724e+07	5.81627e+07	905065	2.73521e+06	6.02583e+07	8.59168e+07	7.68166e+07
393 M	Negative	765170	215970	5.55427e+06	3.02837e+06	3.24637e+06	1.04544e+06	1.02557e+06	5.94068e+06	2.66083e+06	251039	610535	1.42875e+06	8.06194e+07	6.2249e+07	6.70467e+07	46584.5	109403	234374	463332	33220.6	1.27282e+07	1.34703e+06	119456	4.44516e+06	78083.4	2.94855e+07	2.58208e+07	1.03837e+07	1.28577e+06	455661	1.56612e+08	762888	1.38175e+06	3.3916e+06	1.77274e+07	1.12461e+06	2.18024e+08	3.86431e+06	3.4642e+06	1.07366e+07	53356.6	1.10675e+08	6.72149e+07	1.81924e+06	5.54724e+06	3.47237e+07	1.38569e+08	1.10964e+08
404 M	Negative	1.04445e+06	715756	5.23137e+06	3.24492e+06	5.13176e+06	699545	2.72707e+06	4.88572e+06	2.44992e+06	169508	720172	1.12149e+06	7.12518e+07	2.31162e+08	9.80393e+07	217388	70761.3	104056	319525	61807.5	3.28891e+07	1.39899e+06	139633	1.37598e+06	61301.2	2.40791e+07	1.16719e+07	3.45719e+06	561773	845454	1.08881e+08	889683	1.67481e+06	3.57462e+06	1.53062e+07	918525	1.85111e+08	2.18812e+06	2.95553e+06	1.05297e+07	54341.5	5.94461e+07	7.43223e+07	1.05248e+06	3.40009e+06	3.56061e+07	5.11043e+07	88414212
394 M	Negative	1.08848e+06	235345	5.70547e+06	4.48187e+06	3.88136e+06	480580	733747	5.63825e+06	3.40287e+06	112044	1.03653e+06	2.84962e+06	6.03656e+07	1.15684e+08	4.61603e+07	5.14051e+07	44069.9	137580	718696	0	1.31971e+07	1.87496e+06	209068	3.34771e+06	0	2.72492e+07	1.38345e+07	7.2861e+06	585450	551006	1.45825e+08	1.01042e+06	1.55714e+06	4.8041e+06	2.05635e+07	1.33261e+06	191063223	1.57579e+06	2.26698e+06	1.00532e+07	231619	7.66087e+07	1.124e+08	2.71591e+06	5.12574e+06	4.51607e+07	1.07362e+08	1.18459e+08
405 M	Negative	438989	981153	4.8554e+06	7.23147e+06	2.76092e+06	714660	803304	3.87702e+06	3.60758e+06	240205	520644	5.85693e+06	8.935e+07	1.89191e+08	7.74157e+07	44908.9	89215	166891	283823	27372.9	1.5183e+07	3.12822e+06	305857	1.62356e+06	71219.5	3.05364e+07	2.58615e+07	3.6406e+06	915732	565536	2.25929e+08	646637	2.50688e+06	9.87111e+06	2.23779e+07	1.1638e+06	8.59636e+07	2.21207e+06	3.15287e+06	8.45769e+06	106008	4.13639e+07	6.98953e+07	1.62387e+06	4.29266e+06	7.94416e+07	7.68564e+07	119208657
408 M	Negative	1.21478e+06	552403	4.58934e+06	4.75093e+06	3.67895e+06	1.29166e+06	820909	5.30332e+06	1.30486e+06	188677	776066	2.78768e+06	8.75879e+07	6.72734e+06	8.99239e+07	56153.3	47481.9	285336	349353	26615	4.40918e+06	2.06852e+06	189718	6.63583e+06	32950.3	1.57018e+07	1.93396e+07	7.97077e+06	836386	422093	9.09183e+07	2.50224e+06	504061	2.74824e+06	1.80518e+07	1.90401e+06	214506888	4.38672e+06	2.73884e+06	1.27887e+07	127810	1.82648e+08	1.3014e+08	1.08372e+06	5.48543e+06	5.48034e+07	1.56542e+08	7.93062e+07
428 M	Negative	1.08347e+06	757431	7.09235e+06	1.06289e+07	1.76738e+06	541955	952684	6.38138e+06	4.01662e+06	1.34398e+06	682617	2.23803e+06	5.13134e+07	2.34701e+07	8.82222e+07	46609.7	66677.2	316657	818013	120936	1.80175e+07	4.7531e+06	475022	6.27543e+06	203146	2.4209e+07	3.48881e+07	1.26396e+07	631383	409499	1.09977e+08	667007	985704	3.81715e+06	1.87113e+07	1.86073e+06	1.77981e+08	1.59703e+06	3.50841e+06	1.50483e+07	24239.2	5.36079e+07	1.00779e+08	1.17425e+06	6.42282e+06	1.12373e+08	157363841	1.3694e+08
409 M	Negative	1.66171e+06	117221	7.44111e+06	5.24074e+06	1.43682e+06	1.66716e+06	904695	1.19242e+07	3.43734e+06	155535	861773	2.02291e+06	6.70349e+07	6.02815e+07	1.58562e+08	52549.3	104081	349408	627945	27106.2	2.54433e+07	2.22796e+06	196143	3.06169e+06	6575.79	2.17652e+07	2.23182e+07	6.95305e+06	463521	483851	1.14617e+08	1.66966e+06	704563	3.95772e+06	1.95257e+07	2.97988e+06	2.08347e+08	5.35529e+06	1.49828e+06	6.17232e+06	19795.8	9.65446e+07	8.31545e+07	885517	2.97733e+06	5.49278e+07	6.97946e+07	1.16812e+08
414 M	Negative	806316	50843.7	5.76586e+06	1.11918e+06	1.64262e+06	1.20649e+06	692975	7.67744e+06	2.60807e+06	366471	399094	2.52436e+07	1.36973e+08	1.92139e+07	4.95154e+08	74289.6	126120	118080	673800	37560.5	1.61856e+07	2.0133e+07	55495.8	1.12806e+06	0	6.43797e+06	1.34111e+07	4.68671e+06	672658	270785	5.84419e+07	2.83275e+06	1.72079e+06	2.84159e+06	1.51013e+07	1.21699e+06	9.70869e+07	4.2587e+06	2.44966e+06	3.8151e+06	1.20099e+06	7.99893e+07	6.28995e+07	769278	3.57216e+06	1.43834e+07	5.17373e+07	5.37327e+07
417 M	Negative	1.16035e+06	128073	5.15417e+06	3.51789e+06	1.89768e+06	1.13309e+06	1.40459e+06	4.58393e+06	3.60227e+06	242404	986195	851846	8.70584e+07	3.75605e+07	1.70723e+08	30227	92245.4	181532	238066	22682.3	1.67756e+07	2.14606e+06	130078	1.46882e+06	18438.1	1.24315e+07	1.50286e+07	6.87927e+06	683503	419987	8.21991e+07	1.0851e+06	1.32249e+06	2.37251e+06	1.23612e+07	1.63362e+06	283743630	3.62773e+06	2.2663e+06	1.30103e+07	25271.3	9.9245e+07	4.87715e+07	1.15242e+06	3.01029e+06	4.9762e+07	6.03003e+07	1.37852e+08
423 M	Negative	2.9802e+06	212085	5.15397e+06	6.14377e+06	3.63251e+06	631391	1.00315e+06	5.66583e+06	3.92653e+06	63158	1.181e+06	2.33845e+06	5.69986e+07	5.00597e+07	1.04204e+08	43154.1	15448	660664	1.03501e+06	0	5.46412e+06	2.67872e+06	246919	2.99985e+06	0	1.40965e+07	3.06631e+07	1.82009e+07	1.35087e+06	475144	8.88311e+07	5.31634e+06	1.54759e+06	5.75852e+06	2.54726e+07	1.89496e+06	1.89886e+08	1.93046e+06	4.73805e+06	2.33128e+07	206576	7.66209e+07	1.08096e+08	2.41224e+06	1.18269e+07	6.45978e+07	1.2801e+08	1.3831e+08
426 M	Negative	2.03626e+06	423756	5.95638e+06	5.5646e+06	5.20342e+06	363288	1.20007e+06	6.98984e+06	3.83721e+06	42013.7	1.12785e+06	2.741e+06	8.16149e+07	5.83542e+07	8.0803e+07	61526.1	55760.9	483790	1.55123e+06	26266.7	1.71825e+07	2.35676e+06	217751	3.85046e+06	33842.9	2.17657e+07	2.2021e+07	1.81033e+07	1.61766e+06	803148	1.46435e+08	2.10926e+06	1.06501e+06	9.30431e+06	2.08179e+07	2.21106e+06	1.4354e+08	1.1358e+06	6.10881e+06	1.73444e+07	90704.2	7.24433e+07	1.22102e+08	2.50762e+06	1.06887e+07	6.07436e+07	1.30765e+08	1.01322e+08
429 M	Negative	2.07515e+06	390988	6.8527e+06	4.63584e+06	1.93275e+06	490415	1.43221e+06	6.67275e+06	5.81742e+06	206784	728842	988755	4.74173e+07	5.92099e+07	8.21756e+07	67734.8	100437	280142	600794	22929.2	9.65818e+06	2.01718e+06	148415	1.85936e+06	0	1.43649e+07	2.07028e+07	1.26637e+07	1.35028e+06	694323	8.76922e+07	928532	2.18814e+06	5.29842e+06	3.11114e+07	1.7733e+06	3.01544e+08	1.64965e+06	3.68613e+06	1.078e+07	94587.2	8.0635e+07	5.30711e+07	2.09164e+06	7.00768e+06	4.4922e+07	1.06387e+08	1.69701e+08
435 M	Negative	1.65266e+06	685360	5.63685e+06	2.81679e+06	1.07508e+07	849248	1.8132e+06	5.3313e+06	4.64348e+06	837998	1.18036e+06	2.28369e+06	9.7791e+07	2.85529e+07	1.08635e+08	61641.6	219852	270309	826664	75475	1.87248e+07	1.33872e+06	129501	2.07559e+06	35078.5	1.25054e+07	2.99508e+07	1.08059e+07	1.77436e+06	701275	7.0107e+07	5.43447e+06	3.79455e+06	6.99453e+06	4.10411e+07	3.03266e+06	2.0942e+08	2.6821e+06	3.95791e+06	1.09817e+07	53430.1	7.73944e+07	1.31879e+08	2.29979e+06	1.46856e+07	3.06286e+07	9.37107e+07	1.22182e+08
415M	Negative	371108	782033	3.25967e+06	1.85681e+06	2.47726e+06	318994	719800	1.21387e+07	2.62613e+06	154669	549959	925174	5.20012e+07	1.5245e+08	1.67923e+08	283457	163627	130124	501219	25374	3.87691e+07	806665	70510.5	1.46629e+06	100852	1.78917e+07	2.25168e+07	5.71066e+06	1.70809e+06	727677	1.06705e+08	924940	1.34608e+06	3.98436e+06	1.10617e+07	1.35834e+06	162702938	1.00226e+06	2.28127e+06	1.95697e+07	116478	1.24332e+08	5.90889e+07	705938	2.79548e+06	1.9172e+07	7.21049e+07	9.09733e+07
424 M	Negative	2.50189e+06	3.83631e+06	6.26288e+06	4.84624e+06	4.86569e+06	763037	1.84258e+06	8.55303e+06	2.5874e+06	206719	789960	2.15682e+06	7.26897e+07	4.16293e+07	7.04972e+07	81484	94948.1	697805	641535	46635	2.21927e+07	2.13294e+06	175489	2.42448e+06	56554.5	1.67492e+07	3.7681e+07	9.24379e+06	865526	765456	6.61346e+07	2.15178e+06	1.66609e+06	8.96841e+06	2.03902e+07	2.44561e+06	2.83161e+08	2.24901e+06	3.9816e+06	6.21674e+06	35720.4	100024093	1.07617e+08	1.62957e+06	6.05238e+06	5.34134e+07	9.30688e+07	129158673
436 M	Negative	3.6898e+06	326346	8.26896e+06	6.1497e+06	9.93327e+06	351110	1.70065e+06	7.49335e+06	5.59884e+06	1.91483e+06	985903	2.3499e+06	6.39385e+07	1.68341e+07	9.28817e+07	60799	53765.3	488855	1.308e+06	57466.4	1.06414e+07	2.7477e+06	299110	2.50919e+06	13311.7	1.79928e+07	2.83568e+07	1.3502e+07	874892	454588	1.03671e+08	2.37676e+06	3.19852e+06	3.63144e+06	3.03726e+07	2.10824e+06	2.21359e+08	1.16976e+06	3.5242e+06	1.72928e+07	63156.4	5.62394e+07	1.11102e+08	1.70793e+06	6.78739e+06	6.88345e+07	8.72235e+07	1.29471e+08
441 M	Negative	2.56118e+06	322261	6.64305e+06	5.38041e+06	6.16558e+06	439903	1.33901e+06	6.06513e+06	6.34674e+06	3.06209e+06	724395	1.19966e+06	5.33586e+07	7.21876e+07	1.01681e+08	76336.6	92670.7	417247	757290	94357.8	1.67873e+07	2.09175e+06	195019	3.26406e+06	70284.5	2.95259e+07	2.92628e+07	1.13799e+07	951932	673908	1.82541e+08	1.23251e+06	1.84268e+06	1.09723e+07	2.2355e+07	1.80722e+06	1.65884e+08	1.34338e+06	2.99828e+06	1.29165e+07	29197.7	58521307	5.79926e+07	2.09291e+06	6.39595e+06	6.13458e+07	1.09308e+08	1.21976e+08
444 M	Negative	1.62514e+06	226171	6.6096e+06	2.95046e+06	2.79234e+06	649358	1.42179e+06	7.72668e+06	4.61505e+06	230825	1.0177e+06	1.07372e+06	7.85157e+07	5.5871e+07	1.18562e+08	66707.3	59956.8	107587	882672	10032.4	2.0178e+07	1.27287e+06	126958	3.79073e+06	0	3.3882e+07	1.19816e+07	9.60881e+06	779484	607828	1.77795e+08	1.74509e+06	1.65582e+06	8.68596e+06	2.21897e+07	1.85923e+06	1.81591e+08	2.02014e+06	4.14451e+06	1.79355e+07	61916.9	7.21398e+07	5.41607e+07	1.11514e+06	4.55428e+06	3.53117e+07	1.04649e+08	1.15601e+08
450M	Negative	1.4118e+06	668276	6.06175e+06	4.26789e+06	6.92682e+06	1.19833e+06	1.55177e+06	5.83849e+06	5.26646e+06	256094	757943	1.22742e+07	4.52098e+07	1.01798e+07	3.23662e+08	72423	102602	244221	622543	81744.3	1.33504e+07	3.7492e+06	159661	2.54471e+06	89569.2	1.0584e+07	1.97141e+07	2.04389e+07	793843	530461	6.43076e+07	3.17673e+06	1.82655e+06	2.39747e+06	1.70312e+07	1.4106e+06	1.66579e+08	3.81052e+06	3.84896e+06	1.06925e+07	56053.7	7.36412e+07	7.05335e+07	1.14672e+06	5.0302e+06	4.44443e+07	8.20661e+07	1.13918e+08
452 M	Negative	508778	228967	5.52221e+06	5.71006e+06	4.29562e+06	380562	585529	7.40544e+06	3.23978e+06	1.13273e+06	1.11958e+06	1.22945e+06	6.73637e+07	8.16184e+07	5.93541e+07	53785.5	38505.8	129414	694750	53976.8	4.19487e+06	2.57972e+06	208144	3.37546e+06	24017	2.62843e+07	2.12363e+07	1.23143e+07	648103	466766	1.73174e+08	1.09502e+06	1.31272e+06	4.21409e+06	2.19964e+07	2.32273e+06	2.29381e+08	1.24402e+06	5.08403e+06	14734201	74391.4	6.00626e+07	5.79157e+07	1.21285e+06	3.7739e+06	6.1513e+07	8.96571e+07	1.87189e+08
455 M	Negative	2.58584e+06	118287	6.53951e+06	4.90492e+06	5.02583e+06	176397	1.33134e+06	8.57802e+06	5.10554e+06	319336	610246	3.7273e+06	4.41794e+07	7.16505e+07	6.54295e+07	72679.8	105763	355927	1.11877e+06	66155.9	1.39092e+07	2.04881e+06	168672	1.16874e+06	111246	3.55648e+07	2.60911e+07	1.11366e+07	1.01863e+06	457290	1.99149e+08	1.46887e+06	1.28799e+06	4.91007e+06	3.53464e+07	1.9149e+06	1.69804e+08	488803	2.4582e+06	1.12653e+07	43951.4	7.17967e+07	1.41624e+08	868258	1.09611e+07	5.28458e+07	4.69432e+07	1.10886e+08
458 M	Negative	995660	1.01345e+06	6.49106e+06	4.66716e+06	3.30478e+06	502146	1.15174e+06	6.80316e+06	3.87659e+06	1.66331e+06	784630	1.39945e+06	4.56228e+07	2.11185e+07	7.19427e+07	1.07784e+07	104442	325735	390072	116396	2.11847e+07	2.31335e+06	226764	3.02441e+06	108093	4.93636e+07	2.99875e+07	6.24192e+06	857505	541726	3.05591e+08	2.57019e+06	4.02747e+06	2.58479e+06	1.59378e+07	1.50623e+06	1.1067e+08	1.62742e+06	2.82055e+06	1.42157e+07	144021	7.29782e+07	8.48676e+07	770359	4.74781e+06	5.36477e+07	1.03937e+08	1.18157e+08
461 M	Negative	1.44832e+06	483443	5.49357e+06	1.92424e+06	6.018e+06	816516	882057	5.733e+06	2.53708e+06	1.12323e+06	648232	2.51152e+06	6.73546e+07	8.70928e+07	3.32158e+08	76287.4	168210	166314	722385	497409	2.84951e+07	957452	90402	1.30676e+06	575302	8.37913e+06	2.11168e+07	7.74021e+06	633990	569709	5.70811e+07	4.21935e+06	2.71704e+06	1.81914e+06	1.86799e+07	1.38958e+06	1.79859e+08	2.70821e+06	3.24721e+06	4.64843e+06	40088.9	5.08278e+07	1.38138e+08	1.23737e+06	6.62585e+06	2.12003e+07	52623915	8.08462e+07
442 M	Negative	4.55968e+06	442829	7.87534e+06	5.16468e+06	1.30352e+07	869808	1.81314e+06	5.62142e+06	4.02132e+06	1.50891e+06	685681	2.81041e+06	7.24565e+07	2.62764e+07	1.1954e+08	60714.7	81612.9	793113	1.53293e+06	115538	1.30814e+07	2.31909e+06	201871	1.99554e+06	75472.4	2.32937e+07	3.38794e+07	2.07552e+07	1.27515e+06	648895	1.37658e+08	2.69443e+06	1.95027e+06	3.68439e+06	3.24281e+07	2.55735e+06	155130527	3.00104e+06	3.67149e+06	8.69358e+06	82564.9	8.05268e+07	1.31815e+08	2.35154e+06	8.40974e+06	6.12589e+07	8.36197e+07	100802343
445 M	Negative	1.68901e+06	106037	5.29124e+06	3.75068e+06	3.02482e+06	804670	906990	5.36021e+06	2.92132e+06	142981	708680	1.80199e+06	6.2308e+07	121762924	3.79852e+07	39599.6	58246.4	182527	205304	0	6.08404e+06	1.62675e+06	147083	4.10201e+06	0	2.22822e+07	1.27268e+07	7.63139e+06	765196	651222	145613778	746787	517360	4.89786e+06	1.85726e+07	1.64591e+06	293361661	2.52368e+06	2.97706e+06	1.5349e+07	79064.5	4.77309e+07	7.87935e+07	1.36129e+06	4.15394e+06	3.87893e+07	1.00642e+08	1.4171e+08
448 M	Negative	4.16105e+06	108356	6.13233e+06	5.90904e+06	4.23365e+06	379799	1.23119e+06	2.27646e+07	4.02297e+06	491761	991132	2.11965e+06	6.67023e+07	1.91842e+07	1.07041e+08	1.79045e+07	114861	540350	1.00287e+06	36065.8	1.30113e+07	2.50413e+06	227608	2.69373e+06	52180.5	1.29064e+07	2.40005e+07	1.48825e+07	1.22965e+06	2.34618e+06	8.80321e+07	1.75534e+06	1.43551e+06	2.70251e+06	3.39318e+07	2.15596e+06	2.47596e+08	1.18027e+06	3.87652e+06	1.43633e+07	138000	6.27945e+07	8.74528e+07	5.62572e+06	1.11636e+07	5.84899e+07	1.07033e+08	1.17974e+08
451M	Negative	2.88986e+06	443704	6.88218e+06	4.5515e+06	5.00077e+06	562894	2.31963e+06	5.87865e+06	4.45644e+06	558609	987962	1.17456e+06	6.55375e+07	3.76637e+07	1.15028e+08	62689	118087	505621	1.34755e+06	79061.4	9.60786e+06	1.89177e+06	121398	3.5273e+06	131057	2.78337e+07	3.63602e+07	1.8886e+07	1.00505e+06	334411	1.32844e+08	3.38582e+06	3.08097e+06	2.08396e+06	3.84199e+07	1.97953e+06	1.72321e+08	1.61003e+06	3.55424e+06	1.40206e+07	53895.2	6.70893e+07	6.41827e+07	3.89476e+06	9.45377e+06	5.1001e+07	1.32269e+08	1.21303e+08
453 M	Negative	2.64071e+06	1.15332e+06	7.2107e+06	5.7725e+06	8.35677e+06	638258	1.58896e+06	7.77366e+06	3.50418e+06	477810	618229	1.60256e+06	4.19228e+07	9.14758e+07	1.04328e+08	59222.4	104224	331196	907405	62498.8	5.45855e+06	2.36532e+06	243879	2.92755e+06	55950.7	1.66929e+07	2.40607e+07	1.54427e+07	981185	322538	7.88878e+07	2.32951e+06	2.28282e+06	1.58772e+06	3.16421e+07	1.96225e+06	2.62594e+08	1.90789e+06	3.41378e+06	1.29702e+07	35101.8	8.50654e+07	6.00839e+07	1.70794e+06	5.98355e+06	6.16658e+07	1.19058e+08	1.15882e+08
456 M	Negative	2.10081e+06	172706	8.14542e+06	3.55793e+06	9.29975e+06	388451	1.12506e+06	3.86011e+06	3.02857e+06	772435	581505	2.26867e+06	5.47499e+07	4.07899e+07	1.17427e+08	59942.6	64025.7	620349	1.16541e+06	160132	9.40841e+06	1.52274e+06	123071	2.90132e+06	287744	3.41876e+07	2.88355e+07	1.59907e+07	817518	434287	1.7883e+08	2.24076e+06	1.14984e+06	4.43339e+06	1.94175e+07	1.76211e+06	224235228	1.2893e+06	4.07319e+06	7.44698e+06	210295	7.8482e+07	1.07864e+08	1.55725e+06	6.28083e+06	4.16049e+07	7.47611e+07	1.13711e+08
459 M	Negative	2.65877e+06	305535	5.34245e+06	4.78719e+06	4.24823e+06	347759	1.67613e+06	3.51935e+06	2.43484e+06	969654	773916	4.01329e+06	2.44115e+07	3.3544e+07	7.06813e+07	58425.3	38133.4	324278	602298	108605	2.56714e+06	2.3412e+06	186563	4.70901e+06	79715.5	2.33759e+07	1.97869e+07	1.59583e+07	667511	542366	115156648	1.50866e+06	949617	5.97188e+06	2.50327e+07	1.4844e+06	2.9653e+08	1.15032e+06	2.96398e+06	7.13123e+06	57346.3	7.08952e+07	1.4546e+08	1.05907e+06	8.15182e+06	5.69325e+07	1.16628e+08	1.13117e+08
440 M	Negative	457940	297023	3.53104e+06	3.64122e+06	3.72697e+06	743447	499342	4.76381e+06	2.1104e+06	154561	1.13708e+06	2.96802e+06	4.51264e+07	9.23173e+07	4.50382e+07	29717	298146	141955	261307	4455.95	1.10571e+07	1.67106e+06	143200	3.59877e+06	0	2.95529e+07	1.6736e+07	4.38219e+06	461769	435345	169526636	1.3229e+06	1.12186e+06	3.05642e+06	1.0723e+07	1.0294e+06	2.46512e+08	2.18027e+06	2.87986e+06	2.0172e+07	126365	8.61752e+07	1.24833e+08	908616	2.16186e+06	4.07027e+07	1.12896e+08	1.21976e+08
443 M	Negative	397091	1.65165e+06	3.61124e+06	1.0414e+06	3.98831e+06	1.04036e+06	826242	1.61984e+07	2.08251e+06	202145	219865	1.87994e+06	3.24869e+07	3.59241e+08	2.38998e+08	6.90745e+07	380936	94721.3	162677	10693.3	4.13036e+06	2.59328e+06	0	774080	0	1.53736e+07	1.2081e+07	1.37483e+06	93881.5	360438	5.20285e+07	612833	4.17439e+06	1.40926e+06	6.73255e+06	1.24976e+06	1.40641e+08	1.12288e+07	1.1719e+06	5.15169e+06	67086.2	5.00885e+07	4.73178e+07	309284	1.28147e+06	6.7996e+06	4.11796e+07	7.46615e+07
499 M	Negative	2.65883e+06	250231	3.4401e+06	6.40422e+06	5.83876e+06	817720	467311	4.07234e+06	3.12608e+06	160175	819653	1.39951e+06	6.1518e+07	9.27889e+07	1.59343e+07	64118.7	66946.1	262329	75299.1	81355.4	1.78941e+07	2.85474e+06	283562	2.43875e+06	79264.2	1.63174e+07	1.37184e+07	7.24068e+06	712948	662900	9.14938e+07	1.27503e+06	335345	5.78564e+06	1.66606e+07	1.54051e+06	2.63893e+08	2.86461e+06	1.77893e+06	6.26565e+06	70772.3	1.94115e+08	6.95084e+07	2.37387e+06	3.41149e+06	6.79575e+07	9.96619e+07	1.40423e+08
454 M	Negative	1.74936e+06	101924	5.62996e+06	7.66049e+06	2.60994e+06	744268	1.27109e+06	3.77774e+06	3.15257e+06	468973	514889	1.68954e+06	5.05648e+07	3.09851e+07	8.06848e+07	38995.9	99083.7	294725	709019	42317	1.76219e+07	3.49574e+06	314362	3.7815e+06	71543.3	1.4807e+07	2.21966e+07	1.10572e+07	801569	494665	8.77119e+07	1.21236e+06	918270	6.88771e+06	2.41576e+07	1.77316e+06	3.08848e+08	2.36424e+06	4.19669e+06	1.11267e+07	48199.3	6.84744e+07	6.71239e+07	1.67209e+06	8.8717e+06	7.93136e+07	1.35549e+08	1.2376e+08
457 M	Negative	1.44837e+06	203414	5.19457e+06	5.48189e+06	7.77817e+06	579548	985895	4.9199e+06	3.88292e+06	1.41012e+06	654743	1.8909e+06	4.55537e+07	2.90924e+07	1.22095e+08	53869.3	68609.4	345669	713301	137772	1.36492e+07	2.44787e+06	187040	2.64555e+06	126155	2.87846e+07	2.52762e+07	1.25989e+07	1.09801e+06	532450	1.78716e+08	2.15549e+06	2.85409e+06	5.66306e+06	3.00926e+07	2.09148e+06	2.08373e+08	1.78527e+06	3.69547e+06	1.2471e+07	47555.3	7.23994e+07	9.40558e+07	2.50238e+06	6.64425e+06	5.71241e+07	102336666	1.01319e+08
460M	Negative	1.88298e+06	369178	4.27026e+06	3.75302e+06	5.60331e+06	299580	1.02652e+06	3.28662e+06	2.97141e+06	559373	792927	1.3255e+06	7.44368e+07	1.46102e+08	6.12934e+07	58491.6	85380	481001	353559	76543.3	6.00037e+06	1.68383e+06	164768	3.76374e+06	153036	2.51102e+07	3.48002e+07	9.70894e+06	790296	370912	1.4749e+08	1.58341e+06	2.07125e+06	2.77751e+06	2.3481e+07	1.84874e+06	1.69273e+08	749751	4.12646e+06	1.00717e+07	38088.9	6.03714e+07	6.69394e+07	2.06499e+06	5.93962e+06	4.27824e+07	1.50695e+08	1.29585e+08
466 M	Negative	1.18893e+06	130933	6.49058e+06	1.0478e+06	6.31939e+06	450026	1.97859e+06	6.58936e+06	2.85933e+06	328330	330580	2.72459e+06	5.74534e+07	6.96522e+07	1.6724e+08	44358.7	807837	235074	250457	94483.7	1.83746e+07	1.06634e+06	34662.4	3.08921e+06	134073	1.13256e+07	2.55284e+07	5.22954e+06	809458	489315	8.44903e+07	1.51334e+06	1.27931e+06	4.80727e+06	2.33062e+07	1.74429e+06	2.27689e+08	1.44958e+06	2.7037e+06	7.06823e+06	49153.8	7.55503e+07	1.46731e+08	808633	2.84904e+06	1.14445e+07	1.01741e+08	1.08377e+08
467 M	Negative	1.50951e+06	109359	3.50188e+06	2.86137e+06	3.71445e+06	450452	845099	3.73583e+06	2.92382e+06	413139	1.18664e+06	3.6927e+06	5.72118e+07	5.15333e+07	8.04656e+07	6.75499e+07	46289.6	257083	397691	50488.6	1.0355e+07	1.12108e+06	99671.6	2.79805e+06	95958.9	2.8708e+07	2.03061e+07	8.86425e+06	658074	346373	1.94786e+08	3.16902e+06	2.30202e+06	3.79792e+06	1.86798e+07	1.65532e+06	1.58899e+08	3.14796e+06	4.48124e+06	1.63083e+07	70674.8	4.61016e+07	1.6365e+08	1.21043e+06	8.43822e+06	2.73104e+07	8.35957e+07	1.07843e+08
470 M	Negative	1.85226e+06	116980	7.18988e+06	5.01241e+06	1.32313e+07	564563	1.23594e+06	4.91012e+06	2.95341e+06	272452	803441	1.98089e+06	6.52273e+07	6.5893e+07	6.83304e+07	80089.9	107466	424933	541677	113833	1.71819e+07	2.30532e+06	184595	4.0321e+06	164218	3.23017e+07	2.63721e+07	9.2128e+06	784993	486178	1.49139e+08	860040	608087	3.3337e+06	1.83961e+07	2.26869e+06	2.09846e+08	1.7959e+06	4.92432e+06	9.07938e+06	51985.9	110224081	8.15691e+07	2.48718e+06	9.37951e+06	6.01933e+07	9.32103e+07	1.20869e+08
473 M	Negative	1.43082e+06	173399	6.5333e+06	5.42943e+06	7.14291e+06	697966	1.28609e+06	1.05421e+07	4.41642e+06	301067	550222	1.27651e+06	4.83392e+07	9.6145e+07	115538683	51324	49883.1	195567	540907	58943.3	7.0094e+06	2.42547e+06	242968	2.00263e+06	65204.7	2.59175e+07	1.91066e+07	1.10884e+07	514318	1.16524e+06	1.59439e+08	2.60162e+06	2.11952e+06	7.62618e+06	2.09134e+07	7.08644e+06	2.00647e+08	2.19296e+06	2.9102e+06	1.1997e+07	61897.2	7.67749e+07	5.95497e+07	2.16664e+06	4.6273e+06	5.96358e+07	6.44253e+07	137692873
476 M	Negative	2.32099e+06	145169	7.23757e+06	6.04557e+06	1.34925e+07	1.81057e+06	2.55917e+06	7.02599e+06	3.83281e+06	152099	1.89353e+06	2.18391e+06	9.7642e+07	1.88916e+07	1.39677e+08	650261	120166	319214	539125	66324	9.75806e+06	2.78826e+06	233201	4.02018e+06	90782	9.22025e+06	2.78234e+07	1.26936e+07	1.2515e+06	691769	5.98515e+07	1.95854e+06	1.80638e+06	6.32143e+06	3.64312e+07	2.21431e+06	1.52536e+08	5.6994e+06	1.9249e+06	8.10191e+06	40833.8	8.04218e+07	1.10753e+08	2.33813e+06	6.80974e+06	6.44847e+07	1.48418e+08	1.10751e+08
488 M	Negative	2.57618e+06	646083	6.94435e+06	6.37829e+06	1.32371e+07	987958	1.662e+06	5.35893e+06	3.31691e+06	266519	708718	2.8496e+06	8.74339e+07	2.20998e+07	1.1414e+08	34189.9	90172.1	831394	557689	54616.5	1.36273e+07	2.9507e+06	242827	2.44566e+06	80644.7	1.81531e+07	4.20413e+07	1.16661e+07	1.14128e+06	593902	9.81046e+07	1.98322e+06	2.12753e+06	3.77809e+06	2.534e+07	2.17113e+06	1.69974e+08	3.35208e+06	4.77369e+06	1.14771e+07	120993	8.06373e+07	1.43701e+08	1.82934e+06	7.83449e+06	7.39095e+07	1.02821e+08	1.09362e+08
494M	Negative	4.10927e+06	1.01178e+06	3.27071e+06	3.71946e+06	4.3636e+06	876986	1.21279e+06	5.1662e+06	1.16427e+06	298951	310056	787019	2.92615e+07	7.41824e+07	1.36093e+08	34437.9	76802	963936	538680	55382.1	1.6016e+07	1.71753e+06	157124	2.44738e+06	101016	3.10532e+07	3.59204e+07	7.97775e+06	1.09816e+06	465407	1.87181e+08	1.21982e+06	1.20854e+06	3.79091e+06	1.88931e+07	1.49916e+06	2.21423e+08	3.08981e+06	3.73883e+06	1.41613e+07	25073.8	1.25195e+08	4.44368e+07	964400	5.84899e+06	4.14052e+07	7.54515e+07	1.06728e+08
468 M	Negative	2.74605e+06	311934	6.20531e+06	4.18669e+06	8.17282e+06	330256	554259	6.29498e+06	3.04473e+06	153059	887738	3.90474e+06	4.87761e+07	5.56368e+07	6.29941e+07	52665.6	49903.9	528406	1.26776e+06	50831.8	3.1326e+07	1.91067e+06	204597	3.23839e+06	71790.7	2.82038e+07	3.99489e+07	1.93963e+07	1.80567e+06	1.43889e+06	1.71045e+08	1.54634e+06	672057	6.15019e+06	3.20759e+07	1.89817e+06	1.73365e+08	921329	2.80014e+06	1.15298e+07	107933	6.40049e+07	150545219	2.69268e+06	8.41499e+06	4.39014e+07	1.23589e+08	1.02532e+08
483M	Negative	2.44316e+06	175330	5.88823e+06	4.44434e+06	1.08244e+07	1.19592e+06	378395	3.59697e+06	4.21007e+06	106069	860092	4.60504e+06	5.82173e+07	9.53163e+07	2.23781e+07	57777.8	66822.5	294764	286327	18106.8	4.69809e+06	1.96493e+06	175751	3.51068e+06	22890.7	2.06171e+07	2.4586e+07	1.52169e+07	1.12969e+06	958418	1.21785e+08	1.00964e+06	644337	5.06702e+06	2.96252e+07	1.84315e+06	2.02556e+08	3.93852e+06	3.52227e+06	1.17421e+07	148750	7.17858e+07	1.62842e+08	4.2368e+06	1.09629e+07	4.76825e+07	1.3166e+08	1.34726e+08
486M	Negative	2.08598e+06	140717	5.05107e+06	4.73191e+06	8.93134e+06	730780	1.21704e+06	5.76366e+06	2.97916e+06	443236	730483	2.10095e+06	5.2091e+07	6.20419e+07	1.18523e+08	38154.7	46809.7	470167	529271	83222.9	1.23614e+07	2.0743e+06	167141	2.37565e+06	67550.7	2.82926e+07	3.18926e+07	9.95002e+06	692342	288834	190332623	2.33408e+06	1.60987e+06	2.61002e+06	2.57009e+07	1.81033e+06	1.719e+08	2.34473e+06	4.04947e+06	1.21016e+07	61911.8	4.56588e+07	8.69365e+07	1.26929e+06	6.53022e+06	5.61654e+07	1.09695e+08	1.0964e+08
492 M	Negative	794958	372399	4.53636e+06	5.54014e+06	7.18536e+06	1.38725e+06	2.28089e+06	1.73283e+07	3.30994e+06	238241	1.11819e+06	1.3052e+06	8.84513e+07	3.03084e+07	1.07741e+08	44091.6	189210	394391	578440	41845.5	1.8875e+06	2.43077e+06	187250	4.75059e+06	0	1.44192e+07	5.78602e+07	767698	1.05607e+06	575746	9.99143e+07	1.49733e+06	2.06499e+06	6.57681e+06	2.81959e+07	891806	1.45698e+08	4.66222e+06	2.41879e+06	1.11026e+07	54506.6	1.07582e+08	8.00949e+07	1.81207e+06	5.39482e+06	5.84489e+07	1.8291e+08	7.06755e+07
495M	Negative	0	0	4.60019e+06	5.69068e+06	1.11479e+08	1.48549e+06	178943	6.37391e+06	1.65899e+08	145187	877113	3.40987e+06	1.4904e+07	2.88082e+07	3.48709e+08	1.34408e+06	104635	0	0	0	5.65339e+07	5.78733e+06	113158	0	0	2.03521e+06	8.90483e+06	1.39458e+06	1.5283e+06	1.64248e+06	2.35843e+07	898676	1.36796e+06	1.40073e+06	6.57504e+06	2.57478e+07	1.1005e+08	4.708e+06	1.24197e+06	5.06737e+06	462166	1.42837e+08	2.42438e+07	5.03266e+06	2.92487e+06	1.27888e+07	8.65158e+06	4.12473e+07
469 M	Negative	3.46639e+06	35600.1	8.18336e+06	3.91969e+06	7.3833e+06	1.66361e+06	914741	7.91926e+06	2.5275e+06	40409.5	1.06415e+06	1.54808e+06	6.15725e+07	2.20443e+07	105622719	48971.3	133086	318825	453868	21307.4	8.12628e+06	2.00331e+06	163170	3.60714e+06	32204.4	2.0382e+07	1.40801e+07	1.58746e+07	768720	536867	1.06246e+08	1.17488e+06	1.441e+06	1.90452e+06	1.94956e+07	2.82688e+06	2.72683e+08	6.13313e+06	3.14576e+06	1.31313e+07	46756.9	1.26148e+08	5.51231e+07	1.3711e+06	3.5558e+06	4.42102e+07	9.27242e+07	1.61215e+08
472 M	Negative	2.13999e+06	51912	7.76818e+06	2.67441e+06	9.11238e+06	1.16738e+06	1.46246e+06	5.7584e+06	2.45377e+06	182812	1.28364e+06	3.42079e+06	5.07684e+07	8.74388e+07	9.35365e+07	74986.8	71533.7	182077	901027	19889.5	7.29518e+06	2.25514e+06	97747.5	4.25326e+06	64298.6	1.82029e+07	1.27051e+07	1.99461e+07	450792	380697	8.51338e+07	1.47039e+06	1.30864e+06	1.34429e+06	1.96045e+07	2.26713e+06	2.30168e+08	4.19236e+06	6.19126e+06	1.67808e+07	16490.4	1.30706e+08	8.79624e+07	1.13583e+06	3.78474e+06	3.19582e+07	7.332e+07	1.58181e+08
484M	Negative	385287	1.06405e+06	8.05177e+06	4.82651e+06	2.11785e+07	369433	485560	6.48482e+06	1.6238e+06	73225.1	1.06878e+06	1.99271e+06	4.49139e+07	7.72165e+07	6.74172e+07	49822.9	89115.2	176611	267324	10236.5	7.54787e+06	2.75261e+06	226045	5.56147e+06	0	2.246e+07	2.23467e+07	7.56026e+06	603693	321857	1.0321e+08	1.6293e+06	1.3153e+06	5.18836e+06	1.45838e+07	1.85703e+06	261636833	1.21305e+06	3.52081e+06	6.39721e+06	128311	1.03624e+08	9.06356e+07	1.03507e+06	4.19665e+06	5.99456e+07	1.21892e+08	1.45395e+08
490M	Negative	141360	282603	1.22115e+06	2.13583e+06	1.0503e+06	624242	1.9575e+06	1.4278e+07	4.71009e+06	2.10451e+07	1.49064e+06	417387	6.83044e+07	1.59165e+08	1.03096e+08	33138.5	147322	90639.8	241785	4.56464e+06	6.53774e+07	985027	78866.3	1.4241e+06	4.74007e+06	1.09212e+07	3.63536e+07	5.40752e+06	1.87083e+06	2.96776e+06	109771061	824136	3.31266e+06	1.69008e+07	2.37277e+06	2.57129e+06	1.96828e+08	2.1753e+06	5.05548e+06	1.10688e+07	209469	7.97627e+07	3.1187e+07	6.62827e+06	9.96884e+06	2.77556e+07	7.89587e+07	7.51143e+07
493M	Negative	2.03323e+06	448153	6.34683e+06	9.36725e+06	6.00447e+06	588623	1.44649e+06	4.91105e+06	4.4008e+06	72198.5	890185	784262	6.19764e+07	4.47785e+07	6.42878e+07	50454.4	51508.9	539109	482891	36291.8	1.43159e+07	4.29336e+06	366055	2.04876e+06	60412	2.93824e+07	3.4591e+07	8.98325e+06	1.15139e+06	596375	2.20379e+08	1.21825e+06	4.78738e+06	3.33204e+06	2.44073e+07	2.22289e+06	1.55803e+08	1.98027e+06	4.29797e+06	1.30715e+07	60828.1	1.01075e+08	4.96503e+07	2.00322e+06	5.41915e+06	1.10677e+08	9.07592e+07	1.09098e+08
496 M	Negative	2.07202e+06	838047	2.29911e+06	5.19842e+06	4.06094e+06	426927	2.96453e+06	4.25301e+06	7.83206e+06	254655	744372	1.01543e+06	5.53083e+07	5.07115e+07	6.42601e+07	75976.3	62775.3	524445	1.20203e+06	49119.9	2.01096e+07	2.29583e+06	180362	1.10774e+06	136976	2.03513e+07	4.83944e+07	1.54593e+07	2.12709e+06	743868	1.51204e+08	2.18024e+06	4.17678e+06	1.31986e+07	4.10305e+07	3.50643e+06	1.66636e+08	1.35245e+06	5.64371e+06	7.58319e+06	78815.3	9.84317e+07	6.47036e+07	4.75168e+06	1.34092e+07	6.18178e+07	8.97377e+07	1.09528e+08
497 M	Negative	1.41291e+06	604776	4.47821e+06	4.67451e+06	2.42049e+06	526961	1.30674e+06	2.63876e+06	4.38878e+06	67364.8	503552	1.12632e+06	5.02049e+07	1.66917e+07	9.67586e+07	45037.5	35643.6	311935	954432	55333.8	6.27315e+06	2.28126e+06	167076	2.72646e+06	66475.3	2.26977e+07	2.87088e+07	1.59844e+07	1.84678e+06	579276	1.53362e+08	2.07574e+06	5.63694e+06	2.60789e+06	3.27762e+07	1.8045e+06	1.23947e+08	1.79416e+06	2.45588e+06	1.13293e+07	167027	221123127	8.06122e+07	3.86306e+06	9.11013e+06	5.55391e+07	1.45024e+08	8.09322e+07
501 M	Negative	1.78196e+06	589980	3.46569e+06	3.08056e+06	3.31291e+06	1.10081e+06	2.20019e+06	4.47845e+06	6.41053e+06	135716	807638	1.42938e+06	3.5617e+07	5.2734e+06	200148755	72943.8	327529	233421	206208	10424.4	2.55512e+06	1.55986e+06	104260	972706	28256.3	1.99372e+07	3.09781e+07	1.88493e+07	1.03712e+06	519606	1.40168e+08	1.91524e+06	3.4508e+06	3.11319e+06	2.90692e+07	2.50959e+06	2.08635e+08	3.49379e+06	3.53073e+06	8.85702e+06	61995.9	9.07415e+07	9.48249e+07	2.63493e+06	6.00879e+06	4.05078e+07	5.27385e+07	1.40835e+08
504 M	Negative	505457	273797	2.5364e+06	2.80096e+06	3.19071e+06	1.08894e+06	4.33183e+06	3.1359e+06	4.64853e+06	275643	580279	1.93201e+06	9.24859e+07	6.19296e+07	1.12364e+08	60517	471063	82020.4	354974	36661	6.37365e+06	1.1963e+06	109395	1.07701e+06	87749	1.46955e+07	2.30903e+07	1.023e+07	1.24439e+06	260955	123245059	2.53773e+06	1.51677e+06	2.33994e+06	2.69447e+07	6.36486e+06	2.24574e+08	3.76245e+06	2.71342e+06	5.96192e+06	50574.3	8.85515e+07	8.35329e+07	2.19999e+06	5.77025e+06	3.39931e+07	6.43344e+07	112579537
507M	Negative	1.32391e+06	399017	6.05034e+06	4.48567e+06	1.42174e+07	1.20109e+06	1.82503e+06	5.9027e+06	7.69421e+06	2.54949e+06	576982	1.44457e+06	6.66504e+07	8.69505e+07	3.829e+07	84742.3	63786.6	240614	226527	225925	1.5395e+07	1.97051e+06	136786	1.92717e+06	205668	2.36963e+07	2.32513e+07	1.20927e+07	1.4296e+06	902174	1.4188e+08	667634	1.07261e+06	4.97266e+06	2.58578e+07	2.08563e+06	1.69189e+08	3.86985e+06	3.18514e+06	1.01293e+07	156617	9.97204e+07	8.97886e+07	2.93592e+06	7.55143e+06	5.74373e+07	9.83813e+07	1.4172e+08
513 M	Negative	2.44678e+06	430151	2.62494e+06	8.33631e+06	4.57151e+06	435007	816506	3.23601e+06	3.98926e+06	304000	959462	1.79396e+06	5.02949e+07	1.12515e+08	2.9329e+07	72628.5	46775.4	521958	404842	27721.3	3.37105e+06	3.70989e+06	341940	2.23985e+06	83432.4	1.94163e+07	3.76895e+07	2.4496e+07	1.82623e+06	366228	1.28004e+08	2.70542e+06	826541	2.61194e+06	3.51553e+07	3.08738e+06	2.21177e+08	1.37413e+06	6.96629e+06	1.22055e+07	166614	6.79954e+07	1.02255e+08	4.6379e+06	1.14199e+07	9.4309e+07	1.05061e+08	1.09367e+08
519A-M	Negative	390565	133658	3.14864e+06	1.38828e+06	4.5374e+06	1.02149e+06	791799	2.37804e+06	1.43678e+06	130937	378966	469461	8.57111e+07	4.66634e+08	1.56216e+08	30097.8	524343	49444.9	109080	55428.8	7.73066e+06	669316	55423.4	1.21041e+06	110090	2.10868e+07	1.03369e+07	3.96712e+06	479554	199952	1.67295e+08	1.74037e+06	644641	1.33025e+06	1.11206e+07	718646	7.69314e+07	3.76293e+06	1.51257e+06	5.54815e+06	68002.1	5.95816e+07	3.31152e+07	873463	2.32331e+06	1.76439e+07	3.40873e+07	4.10879e+07
523 M	Negative	1.04578e+06	441561	7.75122e+06	4.75319e+06	8.2378e+06	979100	954676	4.52502e+06	3.01951e+06	1.80645e+06	837488	3.17456e+06	7.16985e+07	4.50812e+07	7.06509e+07	58148.6	47985	326880	753534	86153.8	1.2249e+07	2.03335e+06	189055	3.9847e+06	60326	2.56218e+07	2.84774e+07	1.55455e+07	612911	395019	1.34301e+08	2.33102e+06	816697	6.54163e+06	1.93862e+07	1.63907e+06	2.15479e+08	3.57881e+06	3.78571e+06	1.21245e+07	88656.3	1.10599e+08	7.88492e+07	1.51859e+06	7.44775e+06	5.62907e+07	1.14308e+08	1.26406e+08
498 M	Negative	2.90986e+06	454087	1.24444e+07	6.6532e+06	2.1473e+07	1.3812e+06	1.2555e+06	1.48095e+07	3.85042e+06	586709	1.00691e+06	2.32345e+06	1.02024e+08	7.07891e+06	7.5206e+07	85405.7	351888	423126	386319	165181	4.33453e+07	2.96636e+06	255558	6.47073e+06	431495	8.39278e+06	2.24897e+07	1.68364e+07	546158	1.48902e+06	3.76785e+07	1.48951e+06	1.37979e+06	1.36438e+07	2.15586e+07	1.97297e+06	1.64153e+08	4.62312e+06	3.48305e+06	1.57863e+07	73996.2	1.6491e+08	7.83146e+07	986253	3.08067e+06	7.66573e+07	1.60216e+08	1.01914e+08
505 M	Negative	2.53619e+06	126186	6.82381e+06	4.32449e+06	6.10099e+06	655067	1.65794e+06	4.27304e+06	3.29417e+06	551675	845638	2.73e+06	5.42421e+07	2.01509e+07	1.13838e+08	58095.9	63296.5	448771	1.19024e+06	53408.1	8.53301e+06	1.86145e+06	145002	3.07305e+06	135408	1.72216e+07	2.64537e+07	1.55222e+07	1.03384e+06	440177	1.04771e+08	2.56039e+06	2.1839e+06	5.51338e+06	2.47627e+07	1.75637e+06	2.23629e+08	2.2496e+06	4.54619e+06	1.21038e+07	23732	8.71701e+07	1.25198e+08	1.70825e+06	7.94803e+06	5.0147e+07	9.18663e+07	1.32453e+08
508 M	Negative	573940	133507	8.61012e+06	4.416e+06	8.71187e+06	731708	1.35613e+06	6.33355e+06	4.30385e+06	2.20721e+06	652984	2.88353e+06	81340587	6.75475e+07	1.49367e+08	67822	30130.4	137203	888170	207765	1.36732e+07	2.0204e+06	172276	3.69902e+06	351308	3.20418e+07	2.93293e+07	5.61798e+06	556049	408152	154873896	2.30412e+06	2.85913e+06	3.79826e+06	1.94944e+07	2.42369e+06	1.41665e+08	2.53199e+06	2.24011e+06	4.07671e+06	71608.1	8.90082e+07	7.95806e+07	967844	3.72537e+06	5.05912e+07	8.79209e+07	1.01679e+08
514 M	Negative	512644	220809	8.15333e+06	4.94245e+06	6.53344e+06	838622	718114	5.72724e+06	4.30994e+06	1.66535e+06	679153	814094	4.17694e+07	1.72217e+08	4.75983e+07	65076.5	64239.5	122588	358441	98727.6	1.43647e+07	2.14758e+06	164442	2.63091e+06	79303.4	2.86172e+07	2.25092e+07	1.21112e+07	1.00154e+06	476859	1.58893e+08	627499	2.43964e+06	2.80751e+06	2.24073e+07	1.54146e+06	2.08138e+08	2.89013e+06	3.47322e+06	9.00383e+06	86897	1.22102e+08	4.83231e+07	2.2294e+06	6.30015e+06	5.73398e+07	7.7167e+07	1.12842e+08
517M	Negative	1.87038e+06	218360	7.03642e+06	3.61732e+06	7.23207e+06	1.24872e+06	865687	3.31424e+06	1.86762e+06	1.31172e+06	642009	4.90722e+06	9.08504e+07	3.30966e+07	8.65331e+07	1.60665e+07	101005	608639	328758	126292	1.44058e+07	1.729e+06	176996	1.60565e+06	126759	1.87396e+07	3.39932e+07	8.53931e+06	767069	377741	1.0837e+08	1.14297e+06	1.73634e+06	4.8459e+06	2.03121e+07	1.90654e+06	2.50297e+08	4.32093e+06	3.40367e+06	1.2093e+07	54373.2	8.6126e+07	1.48029e+08	1.42117e+06	6.68312e+06	4.07168e+07	4.87146e+07	1.40324e+08
519B-M	Negative	402766	154002	2.97142e+06	1.10785e+06	5.38735e+06	1.08223e+06	615138	2.8855e+06	2.54457e+06	1.39318e+07	296308	591546	8.85238e+07	4.70609e+08	1.38962e+08	21910.8	581962	68781.6	51699.6	1.08875e+06	1.47881e+07	577627	44237	1.20905e+06	690014	1.61548e+07	8.28746e+06	3.80382e+06	349738	368268	1.37148e+08	1.33516e+06	676854	5.78543e+06	4.05684e+06	730066	9.20167e+07	3.70081e+06	1.79975e+06	5.25765e+06	19339.9	7.53032e+07	3.71572e+07	614453	1.61398e+06	1.42535e+07	3.37652e+07	4.18306e+07
524 M	Negative	2.52668e+06	307361	6.80613e+06	4.1635e+06	3.12172e+07	954471	1.17888e+06	8.13717e+06	2.45045e+06	440262	1.01666e+06	1.98475e+06	7.68097e+07	4.01895e+07	6.67872e+07	36605.9	45847.3	631200	682835	71325.2	3.5488e+07	1.71685e+06	167215	4.23157e+06	68292.8	2.11566e+07	3.09128e+07	6.07024e+06	814591	396445	1.11036e+08	2.99506e+06	1.12081e+06	3.1849e+06	1.98243e+07	1.50146e+06	219476839	3.26892e+06	3.91808e+06	5.61638e+06	43205.6	8.97432e+07	9.22745e+07	1.45325e+06	5.3387e+06	4.67491e+07	1.4621e+08	1.09534e+08
500 M	Negative	803613	119788	7.12729e+06	2.25352e+06	9.02328e+06	1.12381e+06	1.48074e+06	9.0935e+06	4.35096e+06	347062	530395	1.06902e+06	7.07544e+07	1.14373e+08	1.96442e+08	75141.7	315909	116593	301575	36470.1	1.02045e+06	1.74669e+06	96475.8	3.18389e+06	22659.8	2.66293e+07	2.11593e+07	5.72027e+06	575584	473248	1.36349e+08	468866	3.07819e+06	5.10235e+06	3.23169e+07	2.07167e+06	1.88936e+08	3.84151e+06	3.50918e+06	5.1753e+06	35068.7	8.70645e+07	4.92172e+07	943018	4.08401e+06	2.63643e+07	8.66131e+07	8.6681e+07
503 M	Negative	1.31765e+06	65995.7	5.12419e+06	9.529e+06	5.03517e+06	636163	245383	3.80175e+06	2.32428e+06	555439	577173	1.6168e+06	9.25869e+07	7.71218e+07	1.43476e+07	48919.9	92853.5	217869	176101	69367.1	2.47697e+07	4.2928e+06	383442	2.87581e+06	40140	1.35183e+07	1.61843e+07	7.46086e+06	565454	1.15223e+06	89468641	1.01012e+06	216878	1.63519e+07	5.42249e+06	1.57813e+06	324376148	1.94756e+06	2.81181e+06	8.06764e+06	82662.2	8.1932e+07	6.89547e+07	1.8936e+06	5.41163e+06	1.12486e+08	111777458	1.25193e+08
506 M	Negative	83195.4	191582	3.58308e+06	1.09051e+06	6.47707e+06	331866	615150	6.07201e+07	1.05431e+07	7.11149e+07	186708	606700	2.39813e+07	311997959	3.03349e+08	223613	344581	10830.2	279310	2.67655e+06	3.33135e+07	565098	62481.8	526053	540730	1.78954e+07	1.0255e+07	2.07744e+06	309950	261315	1.71384e+08	408365	1.9405e+06	1.36804e+06	6.38535e+06	610899	3.28461e+07	1.22485e+06	1.67228e+06	3.58891e+06	40545.2	4.10282e+07	3.53761e+07	662754	2.40461e+06	1.18531e+07	1.9103e+07	2.03794e+07
512 M	Negative	2.53009e+06	89685.8	4.79771e+06	4.07064e+06	8.08355e+06	2.48364e+06	639698	4.99793e+06	1.78419e+06	140397	1.17893e+06	3.93966e+06	2.68172e+07	2.87054e+07	6.85213e+07	41778.4	245378	464603	364656	20400.4	2.38365e+06	1.82376e+06	143155	4.8996e+06	22752.8	1.84788e+07	2.23969e+07	6.12416e+06	878829	164421	1.00881e+08	2.29592e+06	1.02249e+06	1.11564e+06	2.41244e+07	1.19889e+06	1.91037e+08	8.37455e+06	2.34174e+06	7.16712e+06	52579.3	214758368	1.4234e+08	2.06241e+06	1.07433e+07	4.58333e+07	1.15518e+08	1.40957e+08
515 M	Negative	1.78336e+06	250513	1.32232e+07	7.04498e+06	8.95689e+06	611245	716293	5.52648e+06	2.82695e+06	1.9409e+06	450258	2.63597e+06	5.61897e+07	5.05637e+07	7.69395e+07	72389.7	61708.6	533034	653438	482969	2.03128e+07	3.15879e+06	320033	3.88954e+06	422845	3.78216e+07	3.18163e+07	1.67725e+07	783319	300405	2.05689e+08	787877	1.62041e+06	6.75389e+06	2.82944e+07	1.4127e+06	1.57415e+08	2.07019e+06	3.45727e+06	1.02021e+07	52274.3	8.30688e+07	97288664	1.79205e+06	5.03801e+06	8.09971e+07	8.20976e+07	1.04956e+08
518 M	Negative	1.80307e+06	131143	1.15644e+07	7.00687e+06	1.79277e+07	815702	635665	4.11911e+06	2.6762e+06	198814	734331	1.3502e+06	4.25704e+07	3.94649e+07	5.7282e+07	39090.1	101190	187732	306226	134535	6.12007e+06	3.01087e+06	268619	3.58817e+06	203761	1.54659e+07	1.19384e+07	1.71534e+07	704629	307201	6.91385e+07	1.27576e+06	546342	1.63776e+06	2.17686e+07	2.14668e+06	3.37717e+08	2.73158e+06	2.51477e+06	8.74209e+06	40294.4	1.42014e+08	5.64501e+07	1.58424e+06	4.49986e+06	85741590	7.24368e+07	1.63476e+08
522 M	Negative	2.13321e+06	63170.5	5.72507e+06	7.66261e+06	8.48623e+06	376129	756721	5.63162e+06	2.94465e+06	253356	797784	2.11601e+06	5.29546e+07	4.92735e+07	5.91898e+07	41318.6	65069.6	293718	580351	20535.2	2.194e+07	3.4901e+06	320062	3.40915e+06	6624.18	2.20812e+07	2.05647e+07	7.63867e+06	535113	554488	1.17234e+08	999447	308202	5.3188e+06	1.4839e+07	1.90094e+06	2.83342e+08	1.26241e+06	3.19181e+06	7.21597e+06	72084.2	7.87019e+07	8.88419e+07	1.85457e+06	7.3292e+06	7.53478e+07	1.04456e+08	1.47535e+08
525 M	Negative	2.62943e+06	107854	8.30228e+06	1.41668e+06	4.91098e+06	585793	1.89912e+06	7.2281e+06	3.61515e+06	254538	974531	3.4841e+06	7.58209e+07	6.60514e+07	305778281	66621.2	1.1465e+06	144476	981189	86551.8	1.5594e+07	1.34515e+06	41894.3	1.47912e+06	162675	1.86844e+07	1.5272e+07	1.60485e+07	1.12344e+06	404731	1.29394e+08	4.18012e+06	2.27506e+06	2.50793e+06	2.59678e+07	2.13772e+06	140733879	2.05619e+06	4.62102e+06	1.06335e+07	21436.1	5.41147e+07	9.17714e+07	1.42009e+06	4.5561e+06	1.526e+07	4.40782e+07	7.8179e+07
529 M	Negative	3.69813e+06	101122	8.96073e+06	4.67181e+06	1.12817e+07	683614	916194	7.28508e+06	3.48932e+06	353552	974013	2.64333e+06	4.77656e+07	8.46528e+07	5.70222e+07	57335.7	75988.8	266079	828106	66435.9	1.72304e+07	2.29366e+06	184134	2.73829e+06	41795.1	2.37275e+07	2.10134e+07	9.35702e+06	857606	633640	1.37755e+08	1.40495e+06	776235	3.39264e+06	3.28979e+07	2.11444e+06	2.44269e+08	2.39891e+06	3.96814e+06	5.61202e+06	54432.7	9.56716e+07	1.11808e+08	2.40836e+06	9.7277e+06	5.36932e+07	7.02666e+07	1.23561e+08
532 M	Negative	2.26951e+06	303420	5.64323e+06	2.7091e+06	1.01215e+07	705478	1.56483e+06	7.54354e+06	2.60366e+06	945505	1.13512e+06	3.45063e+06	7.26631e+07	4.87017e+07	1.18564e+08	99791	71490.9	469889	635638	92978.7	1.07234e+07	1.27994e+06	86139.6	2.86743e+06	130016	1.81545e+07	2.97221e+07	1.03957e+07	868659	524198	1.03683e+08	2.26543e+06	4.24315e+06	2.36037e+06	2.3102e+07	1.87118e+06	2.12442e+08	2.40001e+06	4.89877e+06	1.04251e+07	69163.9	8.05901e+07	1.8116e+08	1.43591e+06	5.45765e+06	2.46922e+07	8.31261e+07	9.53678e+07
541 M	Negative	3.4166e+06	215554	1.14948e+07	2.7273e+06	1.2194e+07	1.46372e+06	1.78555e+06	1.17431e+07	4.03276e+06	132991	831592	7.43314e+06	6.39597e+07	2.82766e+07	1.59944e+08	83072.1	83065.6	789689	1.25343e+06	81485.7	3.40931e+07	1.24059e+06	118329	3.58449e+06	101786	2.20737e+07	3.56315e+07	1.40672e+07	766401	708130	1.39784e+08	1.86222e+06	1.17213e+06	6.26414e+06	2.66337e+07	2.66729e+06	1.31104e+08	5.3601e+06	3.08679e+06	9.50471e+06	52871.4	1.00572e+08	1.25708e+08	1.67618e+06	4.90872e+06	3.47291e+07	8.40605e+07	7.8929e+07
543 M	Negative	2.97995e+06	669957	7.81048e+06	4.97177e+06	7.22925e+06	876313	1.01201e+06	6.54324e+06	3.03965e+06	240376	719990	2.73716e+06	6.83136e+07	6.20101e+07	1.0263e+08	45943.8	72882.7	538412	462136	75884.9	1.25293e+07	2.75762e+06	191144	3.14045e+06	102049	1.52744e+07	3.39249e+07	1.0198e+07	961611	535998	8.01449e+07	2.24414e+06	1.84526e+06	3.17245e+06	2.30793e+07	1.89638e+06	218456494	3.48551e+06	2.96947e+06	7.13329e+06	43893.5	1.23212e+08	8.38587e+07	1.33652e+06	6.62905e+06	6.16741e+07	1.21127e+08	128953408
546 M	Negative	1.57009e+06	389766	8.84981e+06	1.76559e+06	8.4896e+07	2.03438e+06	1.35607e+06	9.90925e+06	4.56358e+06	185833	429482	924305	4.74196e+07	1.07541e+08	2.0257e+08	119575	176854	148166	530408	19612.1	1.98039e+07	1.13136e+06	75632.5	2.12502e+06	90207.8	1.95794e+07	1.04166e+07	1.4498e+07	534970	654911	9.75091e+07	1.06051e+06	2.25839e+06	4.15897e+06	1.88891e+07	1.02998e+06	1.57366e+08	7.14906e+06	2.21982e+06	4.20152e+06	21433.3	9.74956e+07	4.91991e+07	973148	5.44288e+06	1.93457e+07	6.74914e+07	1.08308e+08
548 M	Negative	1.24731e+06	125417	6.64136e+06	7.95055e+06	6.5878e+06	485416	833672	5.14704e+06	1.92667e+06	22825.1	921785	3.76548e+06	6.59743e+07	3.627e+07	6.44971e+07	33551.3	60918.6	511722	1.22397e+06	10666.1	6.165e+06	3.52706e+06	323810	3.90289e+06	14189.9	2.06803e+07	2.88825e+07	1.28565e+07	768457	269156	1.08205e+08	1.93524e+06	648377	4.3225e+06	1.95039e+07	2.12564e+06	2.28857e+08	1.60874e+06	3.82827e+06	1.31811e+07	68832.8	9.40496e+07	1.42846e+08	1.52195e+06	7.25868e+06	9.91915e+07	8.32705e+07	1.30592e+08
551 M	Negative	1.7655e+06	71430.4	5.15255e+06	4.44127e+06	3.22336e+06	602890	2318544	3.50761e+06	4.20688e+06	633814	677587	3.21801e+06	5.64951e+07	6.46597e+07	1.68428e+08	51424.2	32066	204463	889159	26261.3	9.46979e+06	1.90736e+06	130325	1.49574e+06	47789.1	2.05995e+07	1.8195e+07	7.27413e+06	1.24169e+06	324387	1.2572e+08	2.27383e+06	1.60589e+06	1.89703e+06	3.04926e+07	2.68815e+06	1.80295e+08	2.17943e+06	5.0127e+06	5.72384e+06	37103.1	3.94606e+07	1.55017e+08	3.1231e+06	1.30728e+07	4.87107e+07	5.24419e+07	1.15381e+08
530 M	Negative	1.51067e+06	418630	8.50437e+06	2.80965e+06	5.73407e+06	987274	781698	9.60641e+06	2.265e+06	929525	913311	1.36102e+06	4.30949e+07	9.41692e+07	1.38791e+08	43191	138604	246560	778173	95749.6	1.05871e+07	1.59742e+06	143161	1.78386e+06	87666.4	2.60511e+07	1.85845e+07	9.70122e+06	774564	315497	1.6808e+08	1.59726e+06	4.21069e+06	4.27781e+06	2.50908e+07	1.52685e+06	2.36155e+08	3.5265e+06	4.10607e+06	6.38205e+06	20962.2	1.04725e+08	6.52821e+07	1.4758e+06	7.36864e+06	4.44072e+07	4.56207e+07	1.02572e+08
533 M	Negative	1.31774e+06	430468	7.70728e+06	3.53858e+06	5.85518e+06	600458	1.23414e+06	8.30188e+06	2.54271e+06	1.35871e+06	936744	8.06838e+06	8.6058e+07	7.33149e+07	1.48004e+08	66323.4	134651	278938	1.02142e+06	133563	15639957	3.00514e+06	139490	4.05446e+06	147937	2.99606e+07	2.35566e+07	9.91352e+06	418782	457765	1.48866e+08	2.29603e+06	2.87313e+06	2.95798e+06	1.46036e+07	1.69535e+06	1.47576e+08	2.14349e+06	3.43774e+06	9.58218e+06	63464.4	1.05662e+08	7.15514e+07	860061	3.5338e+06	4.13419e+07	9.0513e+07	1.05313e+08
539 M	Negative	1.15215e+06	24436.1	4.52801e+06	1.67482e+06	5.32208e+06	444526	722655	7.80027e+06	2.1516e+06	324181	534329	1.46219e+06	8.10938e+07	1.66837e+08	5.0722e+08	60200.8	164017	134315	486248	57343.3	1.65257e+07	2.56233e+07	87612.2	1.06675e+06	119458	2.85937e+06	1.31858e+07	5.87914e+06	520534	473685	2.89451e+07	3.2024e+06	1.98764e+06	2.1677e+06	1.84176e+07	1.48485e+06	1.08513e+08	1.53671e+06	1.99605e+06	4.40001e+06	61315	4.80419e+07	6.07843e+07	1.00444e+06	5.53593e+06	1.93946e+07	2.99783e+07	4.34689e+07
541A- M	Negative	3.24498e+06	238910	9.51974e+06	2.94032e+06	1.3537e+07	1.52401e+06	1.78201e+06	1.24785e+07	5.04468e+06	366796	935812	6.16969e+06	5.93002e+07	3.16794e+07	1.70801e+08	71032.1	83072	645092	1.12707e+06	158233	3.4437e+07	1.30221e+06	91963.5	2.6711e+06	274441	2.26914e+07	3.32473e+07	1.01271e+07	766743	870867	1.16144e+08	1.49883e+06	1.49106e+06	7.55475e+06	2.52374e+07	2.00227e+06	1.6119e+08	5.13846e+06	3.85783e+06	8.71316e+06	43147.3	8.58222e+07	1.20251e+08	1.66219e+06	4.46509e+06	3.67204e+07	7.60833e+07	9.53185e+07
544 M	Negative	2.47483e+06	151303	1.06157e+07	2.21676e+06	9.14007e+06	343503	1.33122e+06	5.55173e+06	4.95124e+06	477899	1.14455e+06	1.8401e+06	5.76068e+07	1.06815e+08	8.13127e+07	102425	61667.4	295951	599492	117424	8.65349e+06	1.08397e+06	91907.3	4.47698e+06	212102	2.46201e+07	1.69026e+07	2.05677e+07	698019	347375	1.10617e+08	1.52638e+06	1.13948e+06	2.51767e+06	2.08983e+07	2.18758e+06	1.96147e+08	1.09621e+06	4.28194e+06	1.47019e+07	29854.5	1.00047e+08	7.37023e+07	1.37166e+06	4.82555e+06	2.29957e+07	1.12301e+08	1.6265e+08
549 M	Negative	826141	71766.2	5.74497e+06	3.35852e+06	4.94189e+06	2.16852e+06	1.39074e+06	4.49305e+06	3.14815e+06	509275	610661	2.0711e+06	7.33323e+07	4.73646e+07	3.4802e+08	41363.4	339813	125558	505593	61325.5	9.67675e+06	1.5528e+06	172536	2.10224e+06	106968	8.43169e+06	1.38496e+07	8.87581e+06	789930	329693	5.63455e+07	2.13388e+06	1.68506e+06	2.51784e+06	1.81267e+07	1.13364e+06	1.68816e+08	7.44573e+06	2.66888e+06	5.27376e+06	37036.3	9.14946e+07	6.72099e+07	1.73661e+06	4.14305e+06	4.13685e+07	6.41804e+07	1.00456e+08
552 M	Negative	803249	30030.4	6.34029e+06	3.07008e+06	3.69748e+06	1.45825e+06	1.73955e+06	6.85517e+06	2.16491e+06	662342	1.58272e+06	4.20477e+06	1.03146e+08	2.10763e+07	185142170	76274.8	310827	157201	228288	85169	2.56362e+07	1.36491e+06	132389	2.69222e+06	176509	1.70886e+07	1.67529e+07	7.43789e+06	663070	332262	1.18294e+08	2.59596e+06	1.42645e+06	3.14558e+06	1.26622e+07	1.80426e+06	1.537e+08	4.96603e+06	3.65951e+06	1.52008e+07	65489	1.28395e+08	1.15259e+08	996036	6.43274e+06	3.86676e+07	7.73994e+07	9.02742e+07
534 M	Negative	938929	57028.6	5.97722e+06	2.5122e+06	8.45235e+06	1.23182e+06	1.71389e+06	7.77621e+06	1.9025e+06	119807	750107	9.2439e+06	8.71499e+07	3.15147e+07	2.80674e+08	61437.3	260831	182835	272965	25256.2	1.96891e+07	1.15141e+07	93637.4	1.68543e+06	10701.6	2.08402e+07	1.30416e+07	6.3496e+06	304828	533998	1.19681e+08	1.40999e+06	1.88671e+06	1.87495e+06	9.27998e+06	1.23837e+06	1.86e+08	4.40534e+06	2.20359e+06	9.1064e+06	31378.1	9.63126e+07	6.19949e+07	806844	2.77286e+06	3.00342e+07	4.34682e+07	9.95019e+07
540 M	Negative	2.86723e+06	71491.3	1.0582e+07	4.50934e+06	1.1881e+07	434307	1.76878e+06	7.69798e+06	4.21275e+06	431935	922530	2.29309e+06	6.85656e+07	4.36069e+07	6.06686e+07	54241.8	31723	203796	1.98752e+06	62671	1.72761e+07	1.97922e+06	181381	3.2286e+06	55742.8	3.03224e+07	1.5375e+07	1.86944e+07	664716	706111	1.85994e+08	1.95653e+06	1.02659e+06	6.62857e+06	2.4629e+07	2.47632e+06	2.04008e+08	1.33602e+06	5.52169e+06	1.43073e+07	32784	7.67142e+07	7.65076e+07	2.04728e+06	7.14287e+06	5.16551e+07	1.06678e+08	1.06853e+08
542 M	Negative	2.72941e+06	51327	8.56584e+06	2.35463e+06	6.48424e+06	898323	719892	7.61108e+06	4.23734e+06	230254	602995	2.1046e+06	1.01603e+08	50609000	4.02967e+08	111531	181058	287308	553009	55086	2.78816e+07	1.6995e+07	102585	1.73302e+06	103503	3.29435e+06	2.29706e+07	6.94675e+06	618959	513679	2.57256e+07	2.70603e+06	1.64091e+06	4.51949e+06	1.97938e+07	1.79374e+06	1.3303e+08	3.19408e+06	2.51565e+06	6.40737e+06	157004	6.99939e+07	8.9769e+07	1.06816e+06	2.76613e+06	2.87618e+07	6.87422e+07	8.41682e+07
545 M	Negative	1.91315e+06	108724	9.84677e+06	5.36784e+06	9.77666e+06	473317	607508	6.23829e+06	2.24641e+06	279930	706663	2.8092e+06	4.12075e+07	7.91547e+07	6.18156e+07	49322.5	57363.4	645223	509669	53549.3	8.68589e+06	2.46986e+06	190938	3.62868e+06	74936.4	1.71905e+07	4.64057e+07	1.53839e+07	1.07191e+06	530197	8.40775e+07	1.34259e+06	1.00564e+06	5.06509e+06	2.26184e+07	2.7597e+06	2.33597e+08	1.57225e+06	5.05272e+06	1.25103e+07	38364.6	1.33925e+08	1.09904e+08	1.72992e+06	1.19522e+07	6.50014e+07	8.95903e+07	1.24613e+08
550 M	Negative	2.43352e+06	986042	6.64186e+06	4.03497e+06	7.70311e+06	657235	2.01408e+06	5.5324e+06	3.83806e+06	370566	934954	1.6803e+06	9.6039e+07	2.6148e+07	1.28558e+08	2.70417e+07	58857.1	264325	484423	41096.2	1.10207e+07	1.95104e+06	150466	1.11271e+06	24633	2.10493e+07	2.58817e+07	1.70679e+07	1.5105e+06	569189	1.43789e+08	2.92625e+06	6.06215e+06	4.47501e+06	4.61695e+07	2.27659e+06	1.95379e+08	2.17621e+06	4.63581e+06	8.48506e+06	110998	7.9533e+07	7.36939e+07	2.45178e+06	9.40763e+06	4.685e+07	4.4554e+07	1.08758e+08
554 M	Negative	1.71919e+06	1.01203e+06	8.83293e+06	4.16855e+06	4.36424e+06	514541	418441	6.64647e+06	2.34338e+06	738112	659953	2.45343e+06	114681203	1.18369e+07	7.21195e+07	49792.3	73342.5	732281	671910	125559	7.29751e+06	1.88413e+06	222127	3.1828e+06	139875	3.40292e+07	4.6584e+07	1.54548e+07	898819	343348	1.55128e+08	1.10948e+06	408859	1.37354e+06	1.52387e+07	2.03297e+06	182000398	1.7997e+06	4.47775e+06	1.76256e+07	39382	1.36745e+08	8.18172e+07	1.03256e+06	5.75807e+06	6.02824e+07	1.04481e+08	1.2191e+08
557 M	Negative	3.46374e+06	492972	8.43721e+06	4.56475e+06	7.99206e+06	569803	893607	8.60084e+06	3.01596e+06	91839.6	2.12993e+06	3.45076e+06	7.64534e+07	3.39264e+07	6.14529e+07	60214.6	78331.5	788079	751288	36836.6	1.78029e+07	1.88541e+06	163984	4.64443e+06	99271	2.41102e+07	2.57509e+07	1.14712e+07	500922	829751	1.13091e+08	2.68696e+06	1.3089e+06	5.3963e+06	1.40365e+07	2.75984e+06	2.06802e+08	1.80283e+06	4.46328e+06	1.35121e+07	32257.6	1.22091e+08	1.18234e+08	1.29458e+06	5.07053e+06	5.33007e+07	1.17821e+08	1.3383e+08
567 M	Negative	3.34696e+06	359295	1.00901e+07	7.9389e+06	7.56385e+06	962303	1.32852e+06	2.45401e+07	3.65847e+06	400196	612692	2.8482e+06	5.79801e+07	3.57732e+07	8.46809e+07	33150.6	87481.8	794932	1.18177e+06	174251	9.02242e+06	3.55634e+06	366740	3.59671e+06	336201	3.35829e+07	4.44642e+07	1.97634e+07	834089	666985	1.57628e+08	946687	1.62101e+06	4.12234e+06	2.45301e+07	2.23952e+06	1.21609e+08	3.3323e+06	3.183e+06	1.2579e+07	26275.5	1.173e+08	9.93201e+07	1.52155e+06	8.90254e+06	9.57303e+07	1.00159e+08	9.06965e+07
570 M	Negative	4.43341e+06	155902	9.12168e+06	4.62551e+06	5.87615e+06	2.04568e+06	988158	5.04305e+06	4.19442e+06	1.96156e+06	1.28018e+06	2.47516e+06	1.08667e+08	1.01599e+08	2.21374e+07	76926.2	91560.6	359986	311738	191567	2.63159e+07	2.19303e+06	167456	2.06603e+06	231119	2.04816e+07	2.80528e+07	1.54717e+07	1.34183e+06	864797	1.35135e+08	2.4237e+06	1.35165e+06	7.33452e+06	4.25113e+07	2.29134e+06	1.62965e+08	7.321e+06	3.44643e+06	1.08316e+07	49051.3	9.02879e+07	1.06086e+08	3.9941e+06	1.26366e+07	5.75192e+07	7.28257e+07	1.15521e+08
576 M	Negative	920442	124415	6.60684e+06	7.95058e+06	4.23004e+06	1.27048e+06	1.27655e+06	4.0041e+06	2.30655e+06	137940	1.24622e+06	2.21799e+06	6.9815e+07	1.25191e+07	1.60512e+08	60783.8	69887.9	290930	644532	84466	8.73983e+06	3.5544e+06	344033	3.9898e+06	136099	1.79686e+07	2.60655e+07	1.18527e+07	742801	314762	1.08199e+08	3.12481e+06	336800	3.44162e+06	1.64939e+07	1.69316e+06	1.8869e+08	4.14217e+06	3.0278e+06	1.03538e+07	43757.3	1.26221e+08	5.56795e+07	1.9679e+06	5.26805e+06	9.30619e+07	1.15116e+08	1.0547e+08
579 M	Negative	1.37895e+06	258243	8.85463e+06	5.08301e+06	8.6201e+06	1.11203e+06	1.77814e+06	6.31574e+06	4.25905e+06	275808	1.08513e+06	1.87774e+06	9.39328e+07	4.30756e+07	94720334	63345.6	58644.6	218117	1.56198e+06	57124.4	2.60843e+07	2.25481e+06	181175	3.75169e+06	81510.3	1.84949e+07	2.58497e+07	1.36112e+07	1.00583e+06	601839	9.50426e+07	1.56717e+06	1.85285e+06	1.07114e+07	2.89235e+07	2.47069e+06	1.43609e+08	3.75337e+06	3.43211e+06	1.27849e+07	46289.1	9.62395e+07	6.27828e+07	2.84998e+06	1.1425e+07	6.32924e+07	1.27912e+08	144507709
555 M	Negative	4.3594e+06	718056	1.06028e+07	4.58829e+06	4.1833e+06	680106	1.59506e+06	9.57778e+06	5.47725e+06	192992	1.46267e+06	2.234e+06	7.05541e+07	3.9678e+07	1.02168e+08	69241.3	64800.2	569027	1.36648e+06	0	9.79827e+06	2.09701e+06	193424	2.77558e+06	0	2.22154e+07	3.88818e+07	1.36331e+07	1.17355e+06	721753	1.19891e+08	3.49667e+06	2.10176e+06	9.63957e+06	5.5662e+07	2.95543e+06	1.57104e+08	2.37398e+06	3.80408e+06	7.63357e+06	62484.6	6.7255e+07	1.12918e+08	2.12997e+06	8.44319e+06	5.3029e+07	1.26818e+08	9.49729e+07
558 M	Negative	1.9173e+06	25851.7	1.25076e+07	4.41016e+06	1.23133e+07	1.60238e+06	924410	1.07697e+07	3.44171e+06	1.99632e+06	458309	2.01421e+06	9.81098e+07	7.60961e+07	5.82308e+07	60459.2	22429.1	173276	965231	316636	46189695	1.88206e+06	146063	2.94742e+06	915358	2.51848e+07	1.62237e+07	1.09013e+07	685033	942778	131450171	1.07511e+06	710133	3.20835e+06	1.6014e+07	2.39899e+06	2.19395e+08	5.43002e+06	4.67027e+06	1.16504e+07	50031.2	1.34773e+08	6.20447e+07	1.20729e+06	3.30135e+06	4.83116e+07	6.90373e+07	1.00779e+08
560 M	Negative	2.46042e+06	57482.6	6.05122e+06	7.26794e+06	4.85678e+06	1.61041e+06	655794	4.40718e+06	2.83203e+06	1.58282e+06	723745	4.46336e+06	6.507e+07	6.95866e+07	1.88569e+07	36703.5	54140.2	311338	235052	250961	1.4785e+07	3.33332e+06	289723	3.93653e+06	244419	2.86672e+07	1.43285e+07	1.56579e+07	553110	607357	1.64415e+08	774014	533883	3.71671e+06	1.51872e+07	1.88315e+06	2.203e+08	5.43688e+06	4.0637e+06	9.58763e+06	59440.8	7.06423e+07	1.35316e+08	1.29695e+06	3.28677e+06	8.27618e+07	1.0432e+08	1.34065e+08
563M	Negative	3.97872e+06	217426	1.05774e+07	4.06477e+06	7.99971e+06	1.16791e+06	696943	1.26214e+07	2.77576e+06	151551	629924	3.21049e+06	6.02232e+07	2.90648e+07	8.61805e+07	80569.9	66838.6	501323	1.11071e+06	26154.1	1.06836e+07	1.88784e+06	186265	3.85054e+06	16183.4	3.20468e+07	2.79968e+07	2.18067e+07	760659	352401	1.79418e+08	1.07163e+06	1.90673e+06	2.92441e+06	3.41682e+07	2.24925e+06	157421899	4.23232e+06	3.77317e+06	7.58008e+06	74308	1.46103e+08	1.1527e+08	3.59218e+06	7.69331e+06	5.05135e+07	8.79267e+07	9.51307e+07
568 M	Negative	5.3525e+06	77308.3	7.86015e+06	5.36141e+06	3.67808e+06	621542	2.07377e+06	7.98114e+06	4.80438e+06	752901	1.48759e+06	3.62201e+06	7.14476e+07	8.29033e+06	9.78745e+07	60084.5	36142	767833	687133	96277.4	9.35176e+06	2.31543e+06	173156	2.72314e+06	109413	1.76955e+07	3.42294e+07	6.21731e+06	1.30627e+06	549255	1.11733e+08	1.51322e+06	785614	4.06894e+06	2.61891e+07	3.60275e+06	185755938	2.04682e+06	4.85054e+06	1.32229e+07	24176.9	8.69845e+07	1.61674e+08	2.04056e+06	6.79866e+06	6.65097e+07	8.29607e+07	1.24818e+08
577M	Negative	615143	118417	8.68768e+06	4.39788e+06	4.25901e+06	836266	779037	7.16242e+06	1.9391e+06	249784	1.11474e+06	1.69656e+06	7.07457e+07	1.93752e+07	145400984	60880.1	75123	173214	479229	116175	1.64668e+07	2.21059e+06	140113	5.18268e+06	185948	2.12849e+07	1.87912e+07	1.08016e+07	594456	426786	9.47856e+07	1.10572e+06	1.98574e+06	3.15245e+06	1.20637e+07	1.51058e+06	2.45068e+08	3.18432e+06	4.39939e+06	1.25013e+07	38262.3	1.91937e+08	6.33568e+07	1.41798e+06	4.96245e+06	4.37977e+07	8.93198e+07	9.99114e+07
580 M	Negative	802806	184631	7.80696e+06	2.75186e+06	9.38645e+06	1.20601e+06	3.65493e+06	6.23968e+06	3.57257e+06	369510	1.02871e+06	1.79252e+06	6.99308e+07	8.20505e+07	1.72827e+08	80267.3	235845	158937	927399	41434.7	18450047	1.29673e+06	108886	3.643e+06	24671.9	2.11394e+07	2.4407e+07	1.47294e+07	1.57163e+06	983053	1.15965e+08	2.49261e+06	3.64923e+06	5.95971e+06	2.06079e+07	2.29712e+06	1.13621e+08	4.56972e+06	3.48052e+06	1.69303e+07	40743.5	7.8019e+07	8.1697e+07	2.0977e+06	1.09682e+07	3.14834e+07	9.59506e+07	7.28959e+07
583 M	Negative	3.15163e+06	295434	1.16957e+07	5.47431e+06	6.4264e+06	1.56261e+06	1.22207e+06	9.68878e+06	5.87798e+06	3.55084e+06	1.07692e+06	2.07322e+06	43211028	4.48333e+07	9.3437e+07	115017	116550	402517	1.00329e+06	179141	1.92254e+07	2.43151e+06	201734	3.65125e+06	40943.6	2.45433e+07	2.80234e+07	2.01453e+07	1.0175e+06	740237	126399745	1.49495e+06	2.8098e+06	6.608e+06	3.26666e+07	1.71336e+06	1.66844e+08	5.19569e+06	3.61555e+06	6.2344e+06	62359.5	1.1752e+08	8.24405e+07	1.83375e+06	7.38132e+06	6.04074e+07	1.13703e+08	1.28079e+08
556 M	Negative	3.00932e+06	137889	7.19588e+06	2.49298e+06	1.5264e+07	512965	1.27933e+06	7.44905e+06	2.39375e+06	123762	848465	2.01371e+06	6.36517e+07	4.85096e+07	1.81778e+08	44267.6	211931	269146	507363	0	8.53328e+06	1.12572e+06	98807.4	2.73398e+06	0	2.56491e+07	1.54874e+07	1.23409e+07	484850	483239	144607716	1.73973e+06	1.37457e+06	4.05383e+06	1.81113e+07	2.86226e+06	2.38859e+08	1.84977e+06	3.75264e+06	7.68838e+06	20567.6	7.97138e+07	9.61483e+07	809342	2.40595e+06	2.89937e+07	5.86926e+07	1.05492e+08
558A- M	Negative	2.81529e+06	90773.6	8.65849e+06	6.92245e+06	1.06834e+07	492482	512079	6.27911e+06	2.56103e+06	127064	1.08591e+06	2.12155e+06	5.93453e+07	1.07822e+08	4.02825e+07	44328.3	71598.9	367100	958822	50038.3	1.06992e+07	2.9966e+06	279808	3.06845e+06	117812	2.1246e+07	2.05028e+07	1.39702e+07	909276	409384	1.21253e+08	1.79642e+06	1.1354e+06	2.39034e+06	2.16328e+07	2.60143e+06	2.2214e+08	1.65271e+06	6.46022e+06	1.39936e+07	77866.5	8.10496e+07	8.39973e+07	1.89163e+06	9.48238e+06	8.08874e+07	8.07297e+07	1.73237e+08
561 M	Negative	2.38878e+06	30307.4	8.48761e+06	6.76424e+06	6.34004e+06	587832	1.6411e+06	5.93679e+06	2.80198e+06	1.73796e+06	831534	1.70475e+06	4.23262e+07	1.6155e+07	9.72174e+07	46004.4	96195.6	313486	452641	174849	6.59394e+06	3.15445e+06	279090	3.43582e+06	159253	2.65589e+07	2.30981e+07	1.61593e+07	1.05852e+06	295307	1.38376e+08	651409	2.08691e+06	4.04603e+06	2.81303e+07	1.91305e+06	243000829	1.87139e+06	4.59085e+06	1.26619e+07	31668.9	1.11943e+08	6.64071e+07	3.48737e+06	1.17044e+07	7.96809e+07	9.13251e+07	1.28458e+08
565 M	Negative	1.66012e+06	340010	7.204e+06	3.35942e+06	6.46797e+06	695997	407482	6.53159e+06	2.99264e+06	1.63403e+06	1.02908e+06	2.61742e+06	6.38656e+07	1.75914e+08	2.59574e+07	8.14364e+06	75626.8	298347	789784	182346	2.50382e+07	1.43468e+06	123603	3.54647e+06	291705	4.16067e+07	2.48706e+07	1.06627e+07	667881	542587	1.87225e+08	1.81479e+06	1.29145e+06	3.77794e+06	2.42334e+07	1.27361e+06	1.56926e+08	2.56112e+06	4.39806e+06	6.15582e+06	36318.3	7.67072e+07	1.01317e+08	1.3913e+06	5.41088e+06	3.81968e+07	9.83984e+07	9.83549e+07
569 M	Negative	1.34662e+06	1.28487e+06	8.13559e+06	3.63217e+06	8.73544e+06	1.16159e+06	717441	4.55868e+06	8.70613e+06	4.83494e+07	459619	3.64223e+06	102315520	7.8853e+07	1.0523e+08	91431	108891	366974	790622	1.5553e+06	4.49371e+07	1.59863e+06	140858	2.33514e+06	2.09727e+06	1.06103e+07	4.17354e+07	8.78286e+06	699396	824567	6.14642e+07	846531	867603	2.46369e+06	2.13243e+07	1.7171e+06	2.11675e+08	3.88761e+06	3.23849e+06	9.93724e+06	46920.3	1.00091e+08	7.83331e+07	1.50369e+06	4.07843e+06	4.0443e+07	8.30724e+07	1.03906e+08
572 M	Negative	1.98158e+06	66633	7.74684e+06	978577	7.17924e+06	803657	945356	8.17765e+06	3.0737e+06	217520	1.20014e+06	1.79514e+06	7.31123e+07	1.58416e+08	1.30079e+08	48507.3	787396	270387	612163	70137.8	3.35376e+07	719170	44037.2	2.77941e+06	181188	2.47165e+07	1.43679e+07	1.44876e+07	716452	616104	1.18386e+08	553850	1.13528e+06	5.65776e+06	1.8009e+07	1.84288e+06	2.00203e+08	2.748e+06	4.66979e+06	1.307e+07	25873.1	1.04917e+08	6.83909e+07	1.23711e+06	5.86856e+06	1.07179e+07	6.32595e+07	9.9504e+07
581 M	Negative	1.04228e+06	896358	8.925e+06	4.60842e+06	3.88801e+06	697050	2.29679e+06	5.2377e+06	4.44856e+06	538278	626808	957996	5.60804e+07	147643033	9.43781e+07	98573.2	153126	101671	452363	126420	2.19899e+07	4.50115e+06	204853	1.75165e+06	303422	3.00166e+07	1.81478e+07	6.34208e+06	774173	611697	1.66016e+08	1.50947e+06	2.68763e+06	3.50831e+06	2.73266e+07	2.03778e+06	1.55593e+08	2.43378e+06	1.84465e+06	5.28574e+06	52644.4	150436822	4.87458e+07	2.23548e+06	4.16729e+06	5.63805e+07	6.30368e+07	7.03936e+07
584 M	Negative	2.68072e+06	70899.1	5.12239e+06	3.09927e+06	3.75117e+06	270926	1.0216e+06	7.77754e+06	1.70736e+06	139520	1.00292e+06	7.01979e+06	4.26374e+07	1.85647e+07	5.81572e+07	36247.4	37308.6	653801	844362	64413.9	1.41465e+07	1.37971e+06	142606	2.23094e+06	43040.6	2.18626e+07	1.68895e+07	5.98359e+06	612998	801708	1.05201e+08	932173	376241	2.28727e+06	1.31538e+07	2.22804e+06	3.07338e+08	895933	4.19044e+06	6.84563e+07	136836	9.2254e+07	1.96537e+08	306570	8.83991e+06	3.76151e+07	4.28525e+07	116226928
585 M	Negative	891018	605491	8.223e+06	5.90984e+06	9.30797e+06	517777	687079	5.85754e+06	2.34423e+06	212542	986062	2.34159e+06	6.12836e+07	8.1734e+07	5.93524e+07	2.04317e+07	68947.3	251503	701573	38271.8	1.35627e+07	2.58489e+06	234197	2.37948e+06	26164.4	2.98732e+07	4.15129e+07	1.08168e+07	1.00065e+06	660407	1.76698e+08	1.69457e+06	1.09707e+06	7.1824e+06	2.8131e+07	2.48659e+06	179427332	2.53311e+06	3.76101e+06	1.18022e+07	58256.5	8.65024e+07	9.25341e+07	1.63695e+06	7.47909e+06	7.08984e+07	9.02009e+07	9.85091e+07
588 M	Negative	2.05474e+06	1.75672e+06	1.11935e+06	1.33859e+06	9.64245e+06	446179	2.79431e+06	3.70776e+06	1.45767e+07	58811.8	922342	1.42791e+06	6.02252e+07	3.45351e+07	8.07426e+07	152351	70297	155132	260764	0	1.15485e+07	815338	110605	916669	0	1.0311e+07	3.51906e+07	9.8775e+06	3.52353e+06	818745	110337606	2.65513e+06	5.52716e+06	1.69865e+07	9.39713e+07	3.49277e+06	1.71555e+08	1.47457e+06	5.0433e+06	3.98059e+06	313308	7.36352e+07	1.61195e+08	8.36798e+06	1.04577e+07	1.74476e+07	6.66832e+07	1.26535e+08
599	Negative	1.69608e+06	143860	7.77508e+06	5.96192e+06	7.42953e+06	502266	1.74106e+06	1.33948e+07	3.10698e+06	220755	467691	1.57063e+06	5.63544e+07	5.20649e+07	8.22623e+07	43927.7	126463	321142	1.2558e+06	15346.4	9.29809e+06	2.58144e+06	248313	2.09537e+06	72582	18954970	2.13939e+07	1.11138e+07	762237	454105	1.26698e+08	2.19697e+06	948643	5.13237e+06	1.76998e+07	1.84504e+06	2.37396e+08	1.71959e+06	4.43964e+06	2.19094e+07	75892.9	5.6464e+07	7.23739e+07	1.3252e+06	9.05079e+06	6.76106e+07	7.88306e+07	1.63568e+08
601M	Negative	903905	94089.4	6.21498e+06	4.17107e+06	1.65518e+07	509654	1.03648e+06	1.5667e+07	3.1931e+06	485467	858820	1.8725e+06	6.13613e+07	5.3466e+07	1.04799e+08	54066.1	67078.7	227365	540615	110608	2.56885e+07	1.78207e+06	164727	1.92223e+06	167221	1.73589e+07	2.1137e+07	9.27704e+06	590734	879097	1.12059e+08	2.07776e+06	2.05009e+06	8.36688e+06	1.88965e+07	1.66923e+06	2.36778e+08	1.56005e+06	3.33954e+06	1.75278e+07	135712	7.61484e+07	9.7934e+07	1.74784e+06	5.33969e+06	4.64808e+07	7.97919e+07	1.48006e+08
604M	Negative	3.17479e+06	226517	4.13299e+06	3.56836e+06	2.31046e+06	1.51026e+06	1.35569e+06	2.2207e+07	2.99365e+06	1.14858e+06	814474	9.35636e+06	7.10791e+07	7.47281e+07	2.62421e+08	57438.6	639613	297376	326233	156685	1.1988e+08	5.90705e+06	112534	382049	695133	2.27887e+06	4.08868e+07	693681	1.19583e+06	702583	2.67172e+07	3.12424e+06	898484	8.41374e+06	2.68002e+07	1.07535e+06	8.80734e+07	5.21582e+06	3.26203e+06	2.23434e+07	61982.3	5.8742e+07	8.45181e+07	2.08739e+06	5.92426e+06	4.11251e+07	9.02157e+07	6.60693e+07
592 M	Negative	3.39384e+06	1.63939e+06	8.35434e+06	3.43244e+06	8.14662e+06	376833	650529	2.4152e+07	3.25628e+06	287735	758271	2.18182e+06	7.7234e+07	2.48342e+07	8.87347e+07	49073.2	66531.1	840434	861200	27382	2.27574e+07	1.43191e+06	129264	3.92046e+06	44782.5	1.81918e+07	4.51806e+07	1.2459e+07	748220	538906	8.55158e+07	2.32396e+06	1.84507e+06	5.13142e+06	2.8973e+07	1.6515e+06	2.17002e+08	1.17113e+06	4.18397e+06	2.09357e+07	105679	8.65318e+07	1.16982e+08	1.80813e+06	8.10617e+06	4.15035e+07	1.06721e+08	145703020
595 M	Negative	1.94209e+06	72491.6	5.05037e+06	5.34734e+06	9.63687e+06	402783	1.14895e+06	1.16174e+07	2.77115e+06	84653.5	1.18758e+06	2.08871e+06	5.83897e+07	1.21821e+08	7.54095e+07	22543.7	65003.4	403053	532403	51752.2	1.92342e+07	2.38674e+06	218861	4.10712e+06	101031	1.28913e+07	2.15065e+07	9.37955e+06	665141	316241	9.57529e+07	1.2176e+06	1.2344e+06	3.65549e+06	1.53661e+07	1.48457e+06	2.45224e+08	1.26771e+06	3.02227e+06	1.72367e+07	62731.1	6.99587e+07	9.85252e+07	1.16964e+06	5.62341e+06	6.34857e+07	1.29768e+08	9.68036e+07
598 -M	Negative	1.91681e+06	380598	5.49771e+06	3.41529e+06	3.23482e+06	885723	1.69779e+06	1.06033e+07	3.38528e+06	293643	429713	6.96505e+06	7.98438e+07	1.86143e+07	2.8085e+08	108337	1.20347e+06	274356	390366	37355.6	4.27272e+07	4.2877e+06	165435	530161	68600.4	3.54449e+06	1.77763e+07	3.35818e+06	594598	634216	2.52841e+07	1.31298e+06	1.8038e+06	4.57073e+06	1.36895e+07	932206	1.89781e+08	2.95961e+06	1.88826e+06	1.84303e+07	45076	5.79452e+07	7.76542e+07	721096	3.82088e+06	4.31368e+07	1.17576e+08	1.08558e+08
600 M	Negative	2.33637e+06	775256	5.78878e+06	2.57102e+06	3.70706e+06	369100	2.34466e+06	1.31804e+07	3.42085e+06	328920	600906	3.40216e+06	7.30641e+07	4.28342e+07	2.02491e+08	33421.3	71397	748893	501155	66728.1	3.08975e+07	1.5587e+06	141799	559791	148373	6.64198e+06	3.61591e+07	3.6093e+06	700929	653594	4.46671e+07	856855	914652	7.01378e+06	1.72216e+07	1.54226e+06	174582190	1.33161e+06	2.76453e+06	1.9316e+07	24621	6.52733e+07	1.24483e+08	1.32341e+06	4.23247e+06	3.45253e+07	9.14571e+07	9.55712e+07
602M	Negative	1.40475e+06	704613	7.52543e+06	4.03394e+06	9.68249e+06	653030	2.28973e+06	9.55772e+06	3.44682e+06	137761	448900	1.28863e+06	4.02652e+07	5.53648e+07	1.14932e+08	53687.6	138776	270925	507846	33969.3	1.25228e+07	1.71931e+06	184156	2.3518e+06	58594.9	2.23505e+07	1.66779e+07	6.86899e+06	390903	562084	123504848	1.78e+06	1.15451e+06	3.96263e+06	1.28522e+07	1.39663e+06	2.0245e+08	1.82662e+06	2.36809e+06	1.21991e+07	17274.9	8.09338e+07	8.50084e+07	889621	3.49583e+06	4.6037e+07	8.25311e+07	1.61162e+08
605M	Negative	952197	372366	3.84608e+06	2.75376e+06	5.19499e+06	1.09933e+06	550031	1.23866e+07	1.75894e+06	540958	809268	796685	2.22798e+07	2.2016e+08	7.64697e+07	30936.9	203980	76386.7	140144	70457.2	5.49122e+06	1.24289e+06	122934	2.88616e+06	79080.6	1.92619e+07	1.16759e+07	6.02379e+06	491319	289732	8.67558e+07	833553	1.22588e+07	2.62964e+06	1.59303e+07	1.0324e+06	2.9599e+08	3.67915e+06	2.57665e+06	1.97909e+07	56009.2	6.38454e+07	4.25013e+07	776887	4.31482e+06	3.12279e+07	7.53724e+07	1.6266e+08
609M	Negative	5.9491e+06	245628	5.36478e+06	1.1546e+06	5.16499e+06	342847	1.9502e+06	2.36165e+07	2.81935e+06	369955	288802	1.16538e+06	5.0204e+07	3.03165e+07	1.37686e+08	31318.6	103458	1.02199e+06	227054	119392	1.45265e+07	512894	49388.5	959747	191186	3.85554e+07	3.39317e+07	6.49038e+06	1.11471e+06	1.0132e+06	3.02798e+08	762028	277822	2.32053e+06	3.05379e+07	1.96827e+06	1.50087e+08	1.28721e+06	2.89279e+06	1.72623e+07	26914.5	9.29313e+07	7.209e+07	1.14913e+06	5.1951e+06	1.41343e+07	4.23656e+07	7.13888e+07
587 M	Negative	1.90631e+06	506545	9.28227e+06	5.40583e+06	1.19881e+07	745104	1.56787e+06	2.46102e+07	5.17151e+06	251059	610294	2.14626e+06	3.45105e+07	4.5344e+07	5.48743e+07	7.57882e+07	62069.2	316518	189300	62051.2	4.39551e+07	1.53657e+06	159660	799895	65712.7	2.22399e+07	2.34755e+07	2.35071e+06	611487	618908	1.3113e+08	779514	474632	1.26053e+07	3.00395e+07	1.64442e+06	1.66869e+08	2.81144e+06	2.31526e+06	1.56453e+07	467713	5.52791e+07	1.02672e+08	1.56399e+06	4.19928e+06	4.25898e+07	120196036	1.05066e+08
[truncated: 54 more rows]
[truncated: 78 more columns]

## Sheet: Metabolomics (AQ)
Name	Label	Adenosine	Sphingosine	L-Tryptophan	L-Alanine	L-Arginine	L-Cystine	L-Glutamate	L-Histidine	L-Isoleucine	L-Lysine	L-Methionine	L-Phenylalanine	L-Proline	L-Serine	L-Threonine	L-Tyrosine	L-Valine	L-Carnitine	O-Propanoylcarnitine	O-Butanoylcarnitine	acyl-C5 (isovalerylcarnitine)	acyl-C8 (L-octanoylcarnitine	L-Kynurenine	L-Glutamine	Lactate	Fumarate	Succinate	2-Oxoglutarate	D-Glucose	Citrate	Hexadecanoic acid	L-Aspartic acid	S1P
[truncated: 831 more rows]

## Sheet: Metabolomics and Clinical
	Label	Sex	Death	Blood group	RH	Age (Y)	Race	(5-L-Glutamyl)-L-glutamine	(R)-S-Lactoylglutathione	(Z)-5-Oxohex-2-enedioate	3-Methyleneoxindole	5-Guanidino-2-oxopentanoate	5-Hydroxyindoleacetate	5-Hydroxyisourate	5-Oxoproline	Adenine	Adenosine	Allantoate	Anthranilate	choline	Creatine	Creatinine	Dopamine	gamma-Glutamyl-gamma-aminobutyrate	gamma-L-Glutamyl-D-alanine	Guanidinoacetate	Guanosine	Hypoxanthine	Indole	Indole-3-acetaldehyde	Indolepyruvate	Inosine	L-Adrenaline	L-Alanine	L-Arginine	L-Asparagine	L-Aspartate	L-Carnitine	L-Citrulline	L-Cystine	L-Glutamate	L-Glutamine	L-Histidine	L-Isoleucine	L-Kynurenine	L-Lysine	L-Methionine	L-Methionine S-oxide	L-Phenylalanine
[truncated: 831 more rows]
[truncated: 150 more columns]

[truncated: 15 more sheets: Time series 188, Time series 701, Time series 707, Correlation to Age, Correlation to IL-6, Correlation to ALT, Correlations to BUN, Correlation to AST, Correlation to LDH, Markers of Death, Correlation to Coagulation, Correlation to CRP, MetaboDrift 5min pos, MetaboDrift 5min neg, Lipidomics]
