# Supplementary material for: Biological and Clinical Factors contributing to the Metabolic Heterogeneity of Hospitalized Patients with and without COVID-19
Source: Research Square preprint supplement (doi:10.21203/rs.3.rs-480167/v1), 2021-05-10
Supplement: Supplementary file [file c42b2c4ec5c866697522b629.pdf]

# SUPPLEMENTARY MATERIAL

## TABLE OF CONTENTS

|                                                                                       |             |
|---------------------------------------------------------------------------------------|-------------|
| <b>SUPPLEMENTARY FIGURES.....</b>                                                     | <b>2</b>    |
| <i>SUPPLEMENTARY FIGURE 1 .....</i>                                                   | <i>2</i>    |
| <i>SUPPLEMENTARY FIGURE 2 .....</i>                                                   | <i>3</i>    |
| <i>SUPPLEMENTARY FIGURE 3 .....</i>                                                   | <i>5</i>    |
| <i>SUPPLEMENTARY FIGURE 4 .....</i>                                                   | <i>6</i>    |
| <i>SUPPLEMENTARY FIGURE 5 .....</i>                                                   | <i>8</i>    |
| <i>SUPPLEMENTARY FIGURE 6 .....</i>                                                   | <i>9</i>    |
| <i>SUPPLEMENTARY FIGURE 7 .....</i>                                                   | <i>11</i>   |
| <i>SUPPLEMENTARY FIGURE 8 .....</i>                                                   | <i>12</i>   |
| <i>SUPPLEMENTARY FIGURE 9 .....</i>                                                   | <i>13</i>   |
| <i>SUPPLEMENTARY FIGURE 10.....</i>                                                   | <i>14</i>   |
| <i>SUPPLEMENTARY FIGURE 11.....</i>                                                   | <i>15</i>   |
| <i>SUPPLEMENTARY FIGURE 12.....</i>                                                   | <i>16</i>   |
| <i>SUPPLEMENTARY FIGURE 13.....</i>                                                   | <i>17</i>   |
| <i>SUPPLEMENTARY FIGURE 14.....</i>                                                   | <i>18</i>   |
| <i>SUPPLEMENTARY FIGURE 15.....</i>                                                   | <i>19</i>   |
| <i>SUPPLEMENTARY FIGURE 16.....</i>                                                   | <i>20</i>   |
| <b>SUPPLEMENTARY DATA TABLE (PLEASE REFER TO “LEGEND” SHEET WITHIN THE FILE).....</b> | <b>XLSX</b> |

***SUPPLEMENTARY FIGURES***

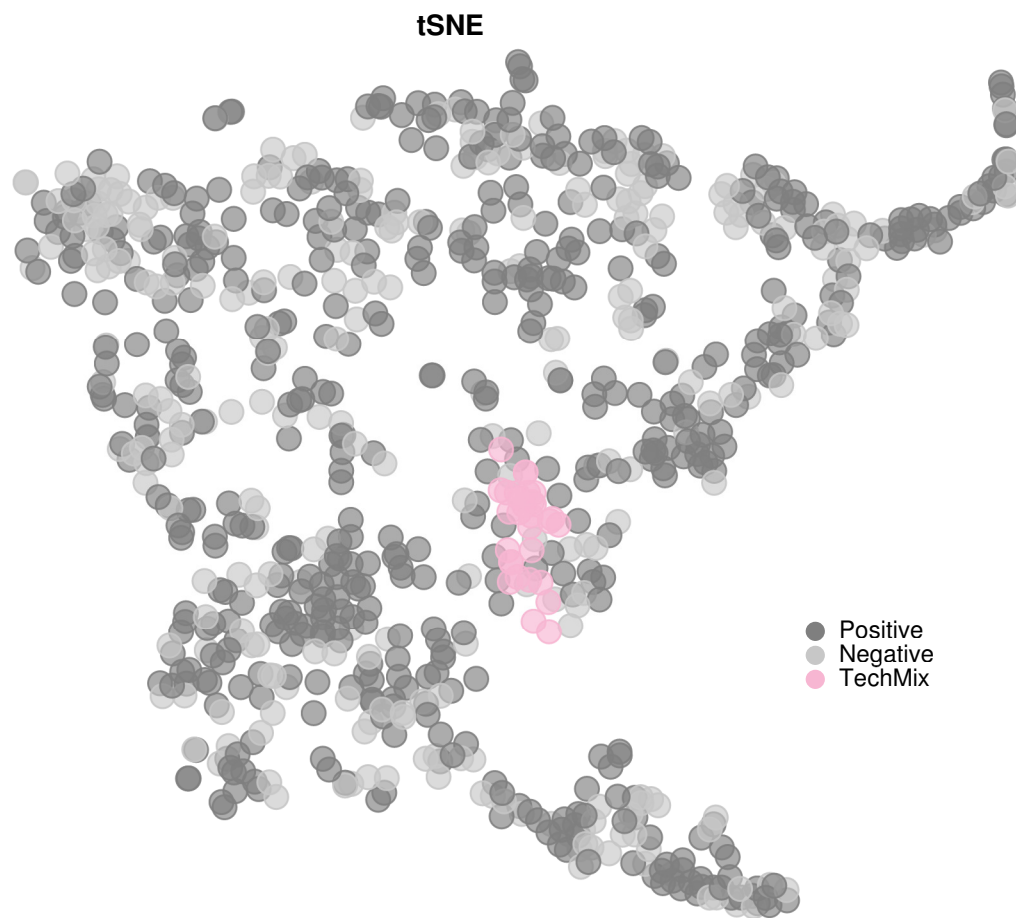

**Supplementary Figure 1 – tSNE Analysis of Metabolomics data confirms quality of the analysis, with technical mixes clustering together (pink).**

Impact of IL-6

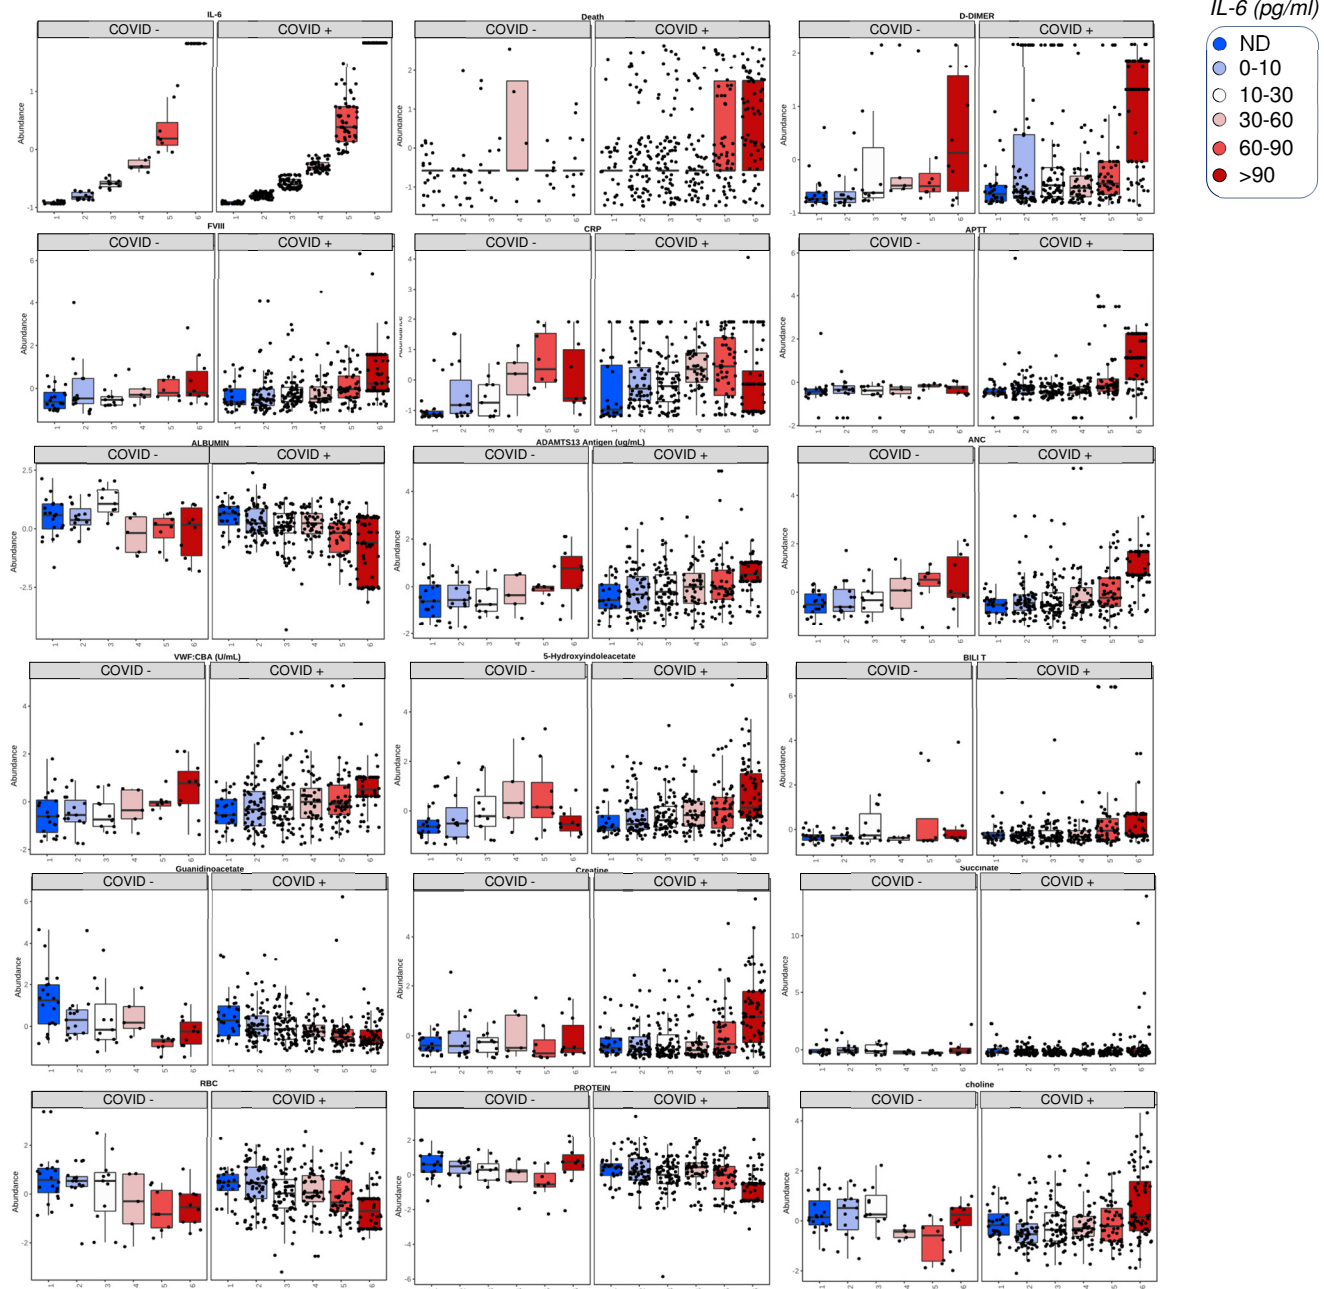

continues →

# Impact of IL-6

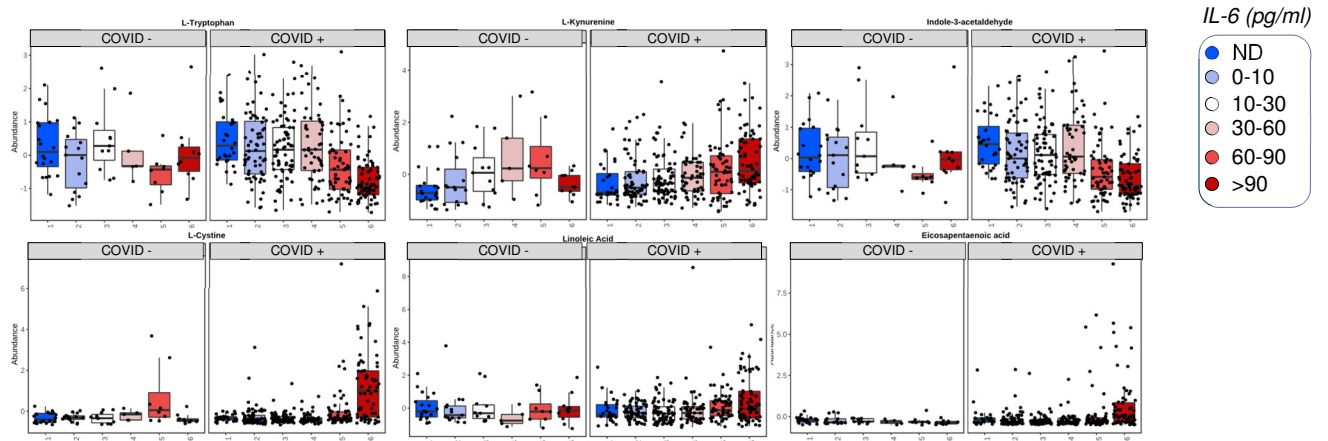

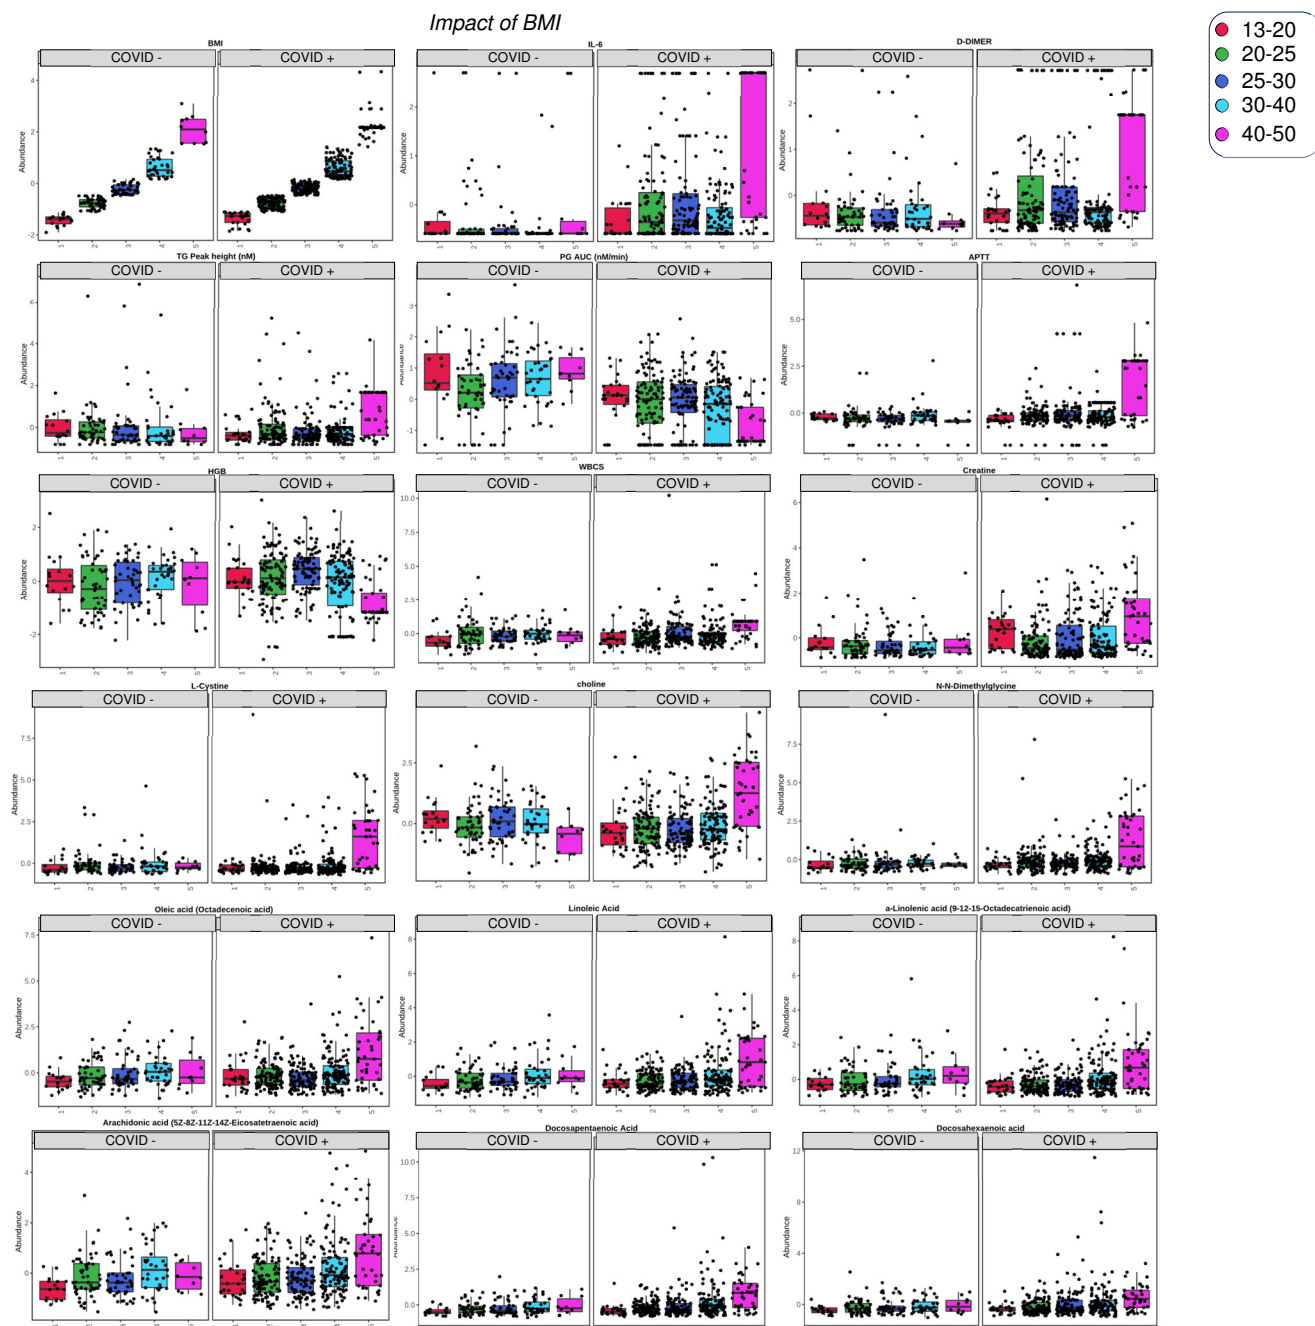

**Supplementary Figure 3 – Markers of BMI in COVID negative (-) and positive (+) patients, as determined by Two-way ANOVA.**

# Impact of Age

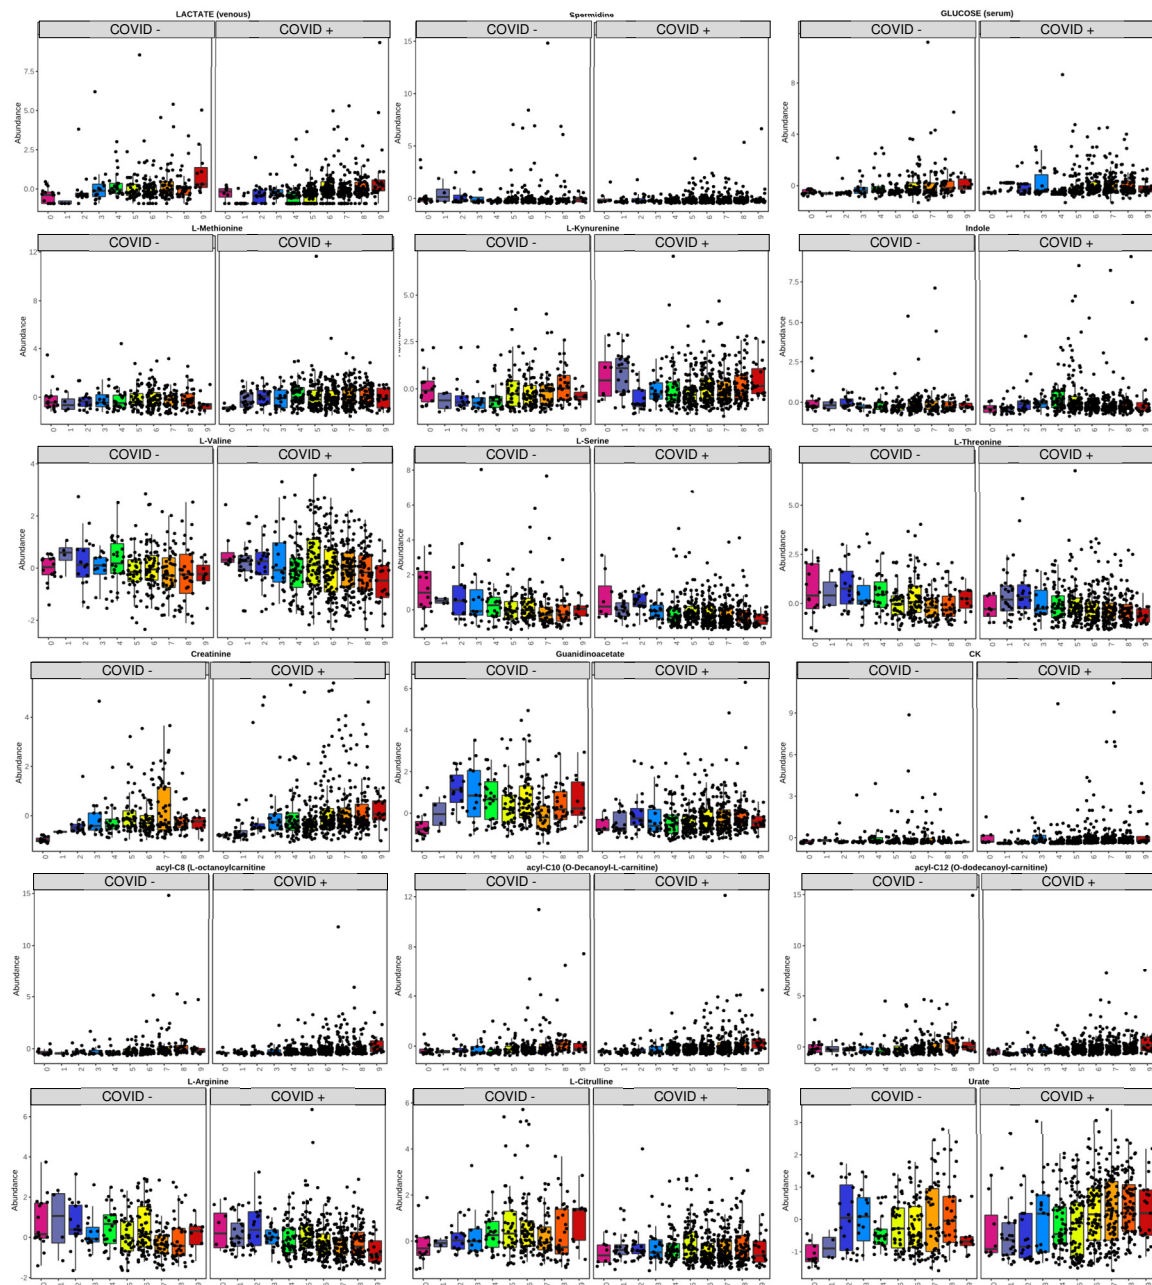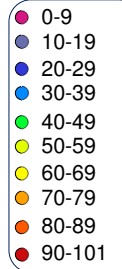

continues →

# Impact of Age

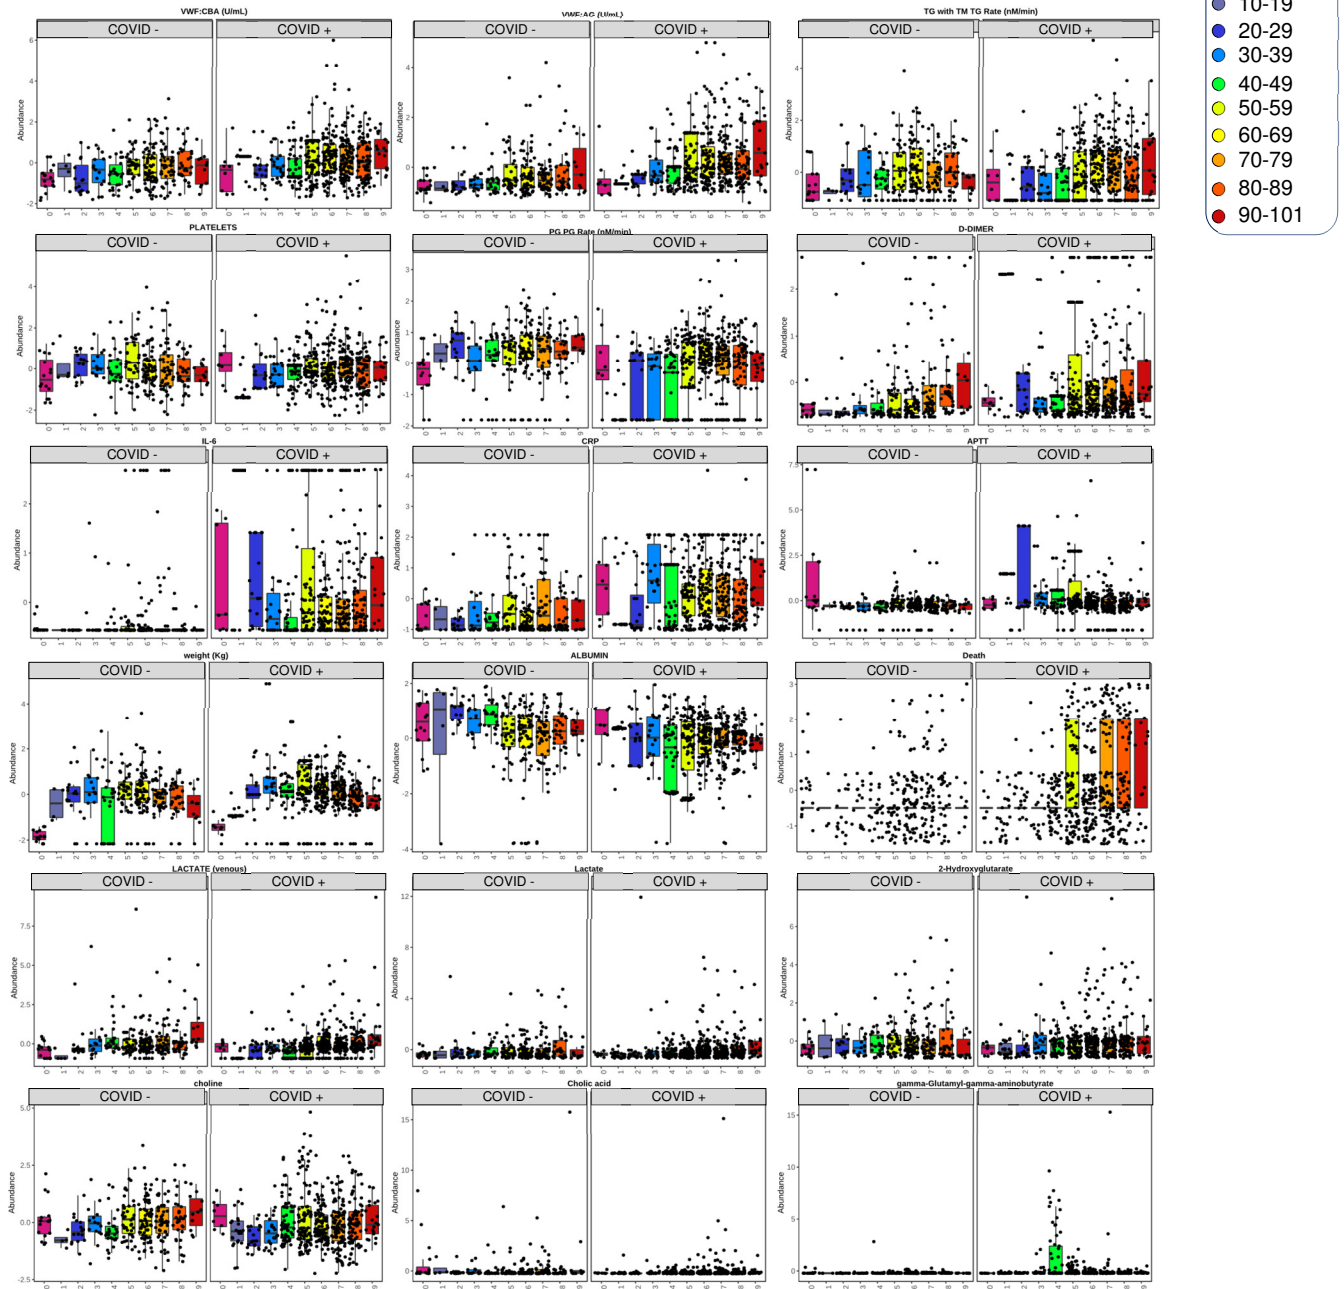

**Supplementary Figure 4 – Markers of age in COVID negative (-) and positive (+) patients, as determined by Two-way ANOVA.**

# Impact of Sex

Female  
Male

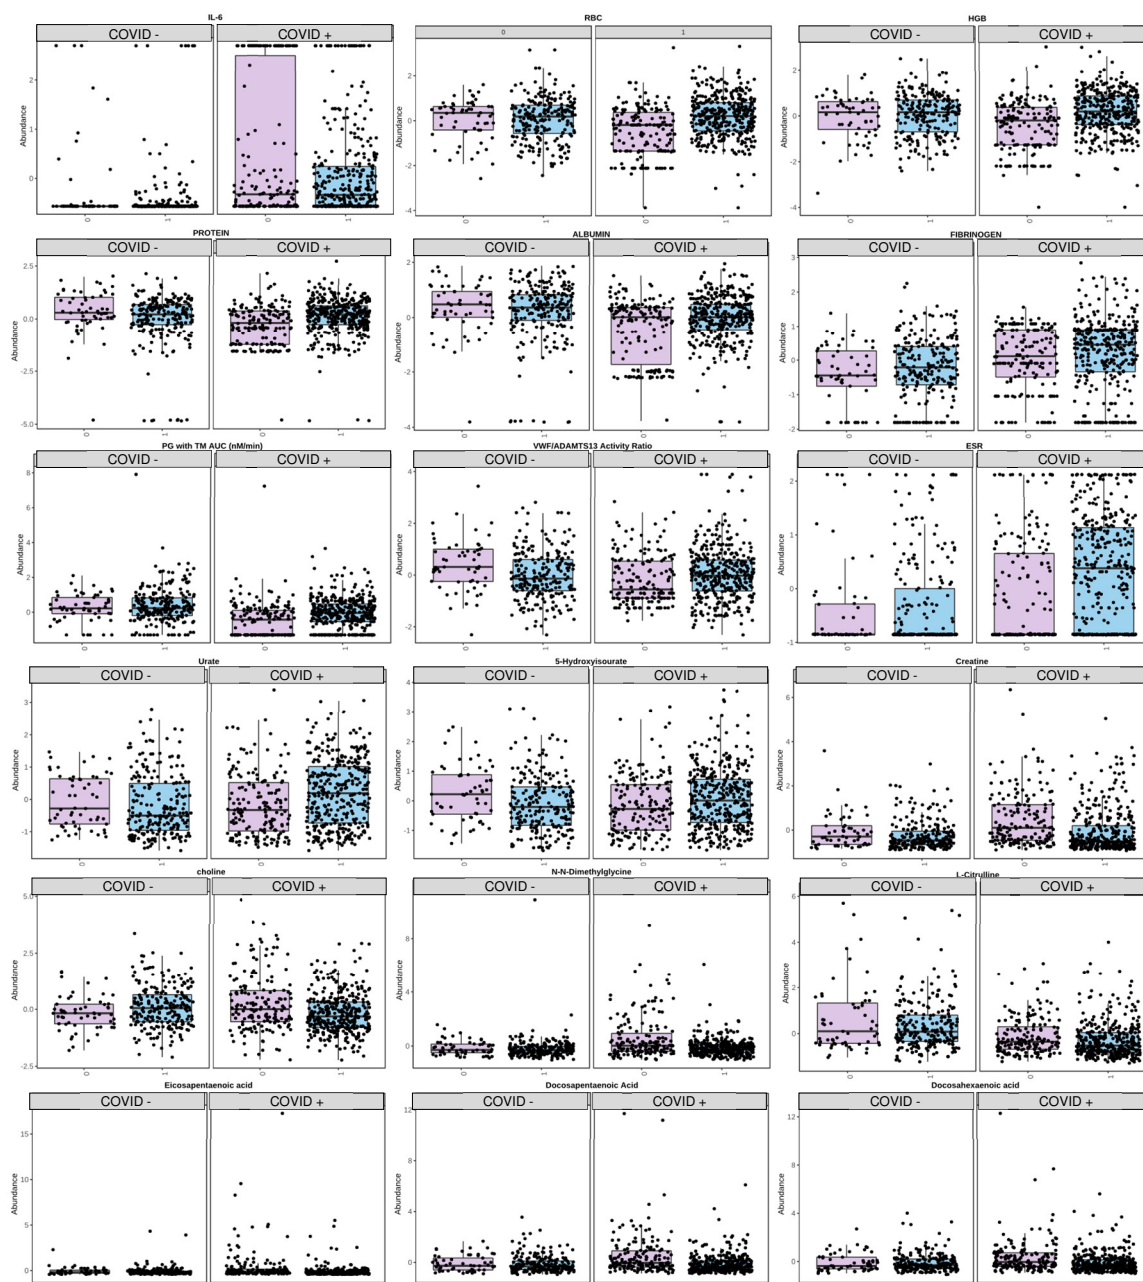

**Supplementary Figure 5 – Markers of sex in COVID negative (-) and positive (+) patients, as determined by Two-way ANOVA (0 = female; 1 = male).**

# Impact of RBC counts ( $1 \times 10^6/\mu\text{l}$ )

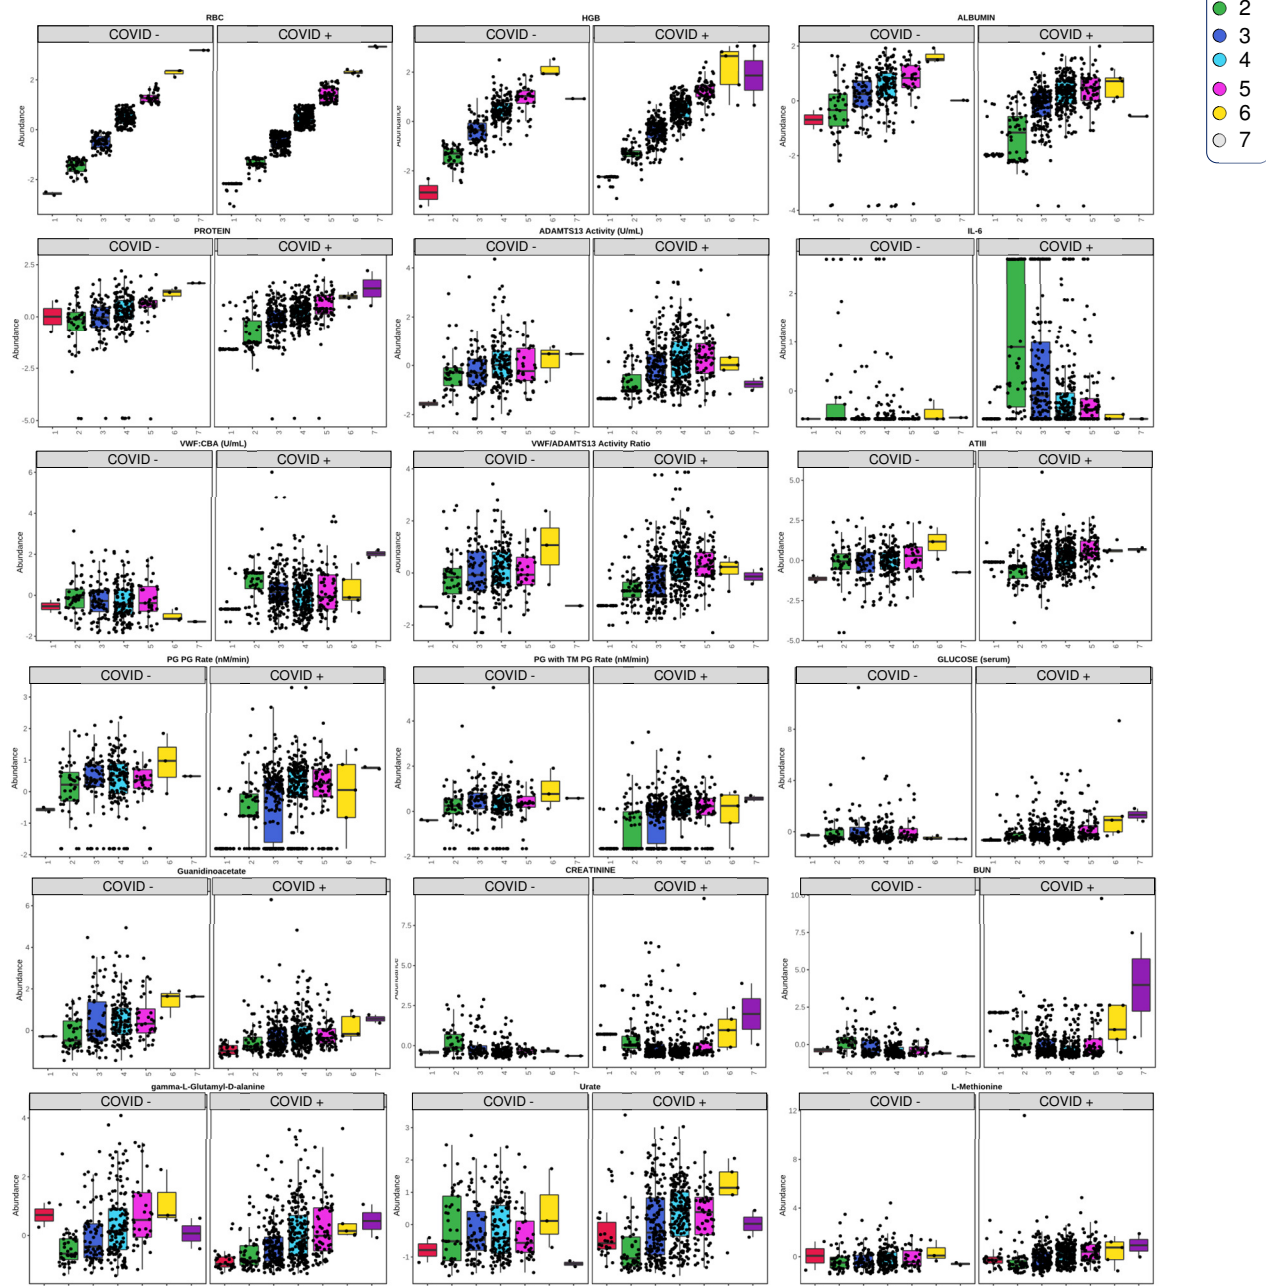

continues →

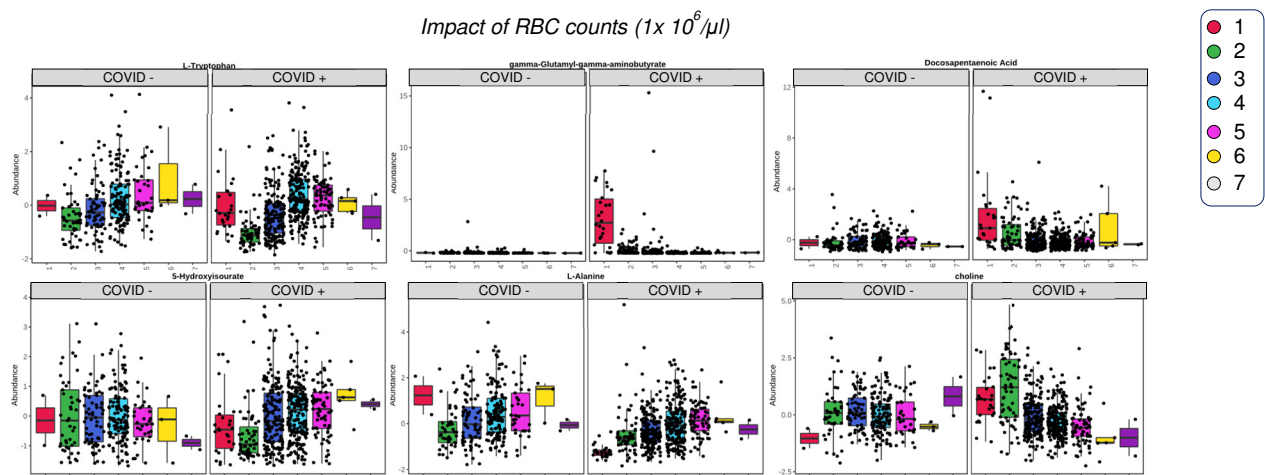

**Supplementary Figure 6 – Markers of RBC counts in COVID negative (-) and positive (+) patients, as determined by Two-way ANOVA (numbers in the legend indicate RBC count in millions per microliter).**

# Impact of Race

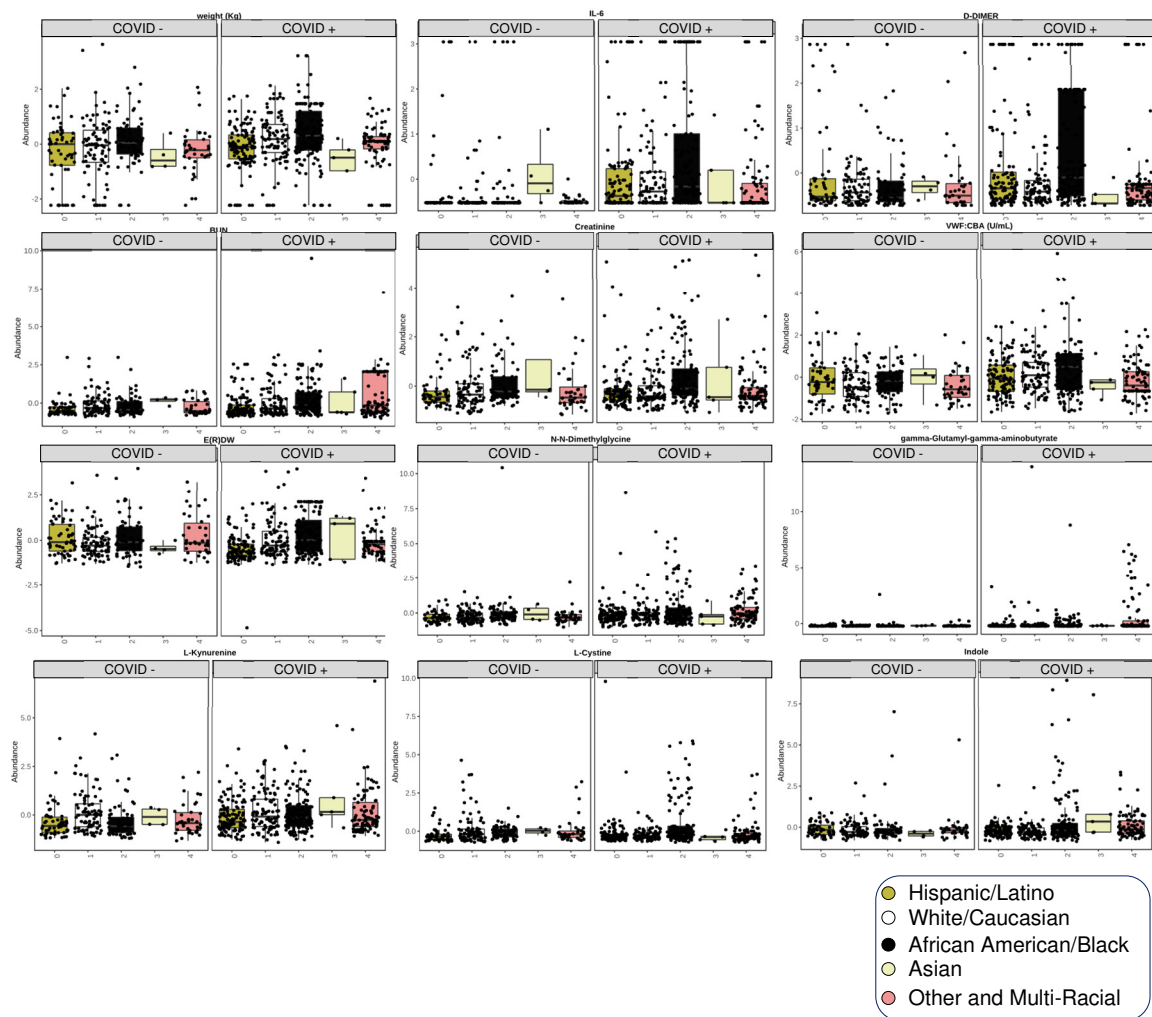

**Supplementary Figure 7 – Markers of race in COVID negative (-) and positive (+) patients, as determined by Two-way ANOVA.**

# Impact of Blood Group

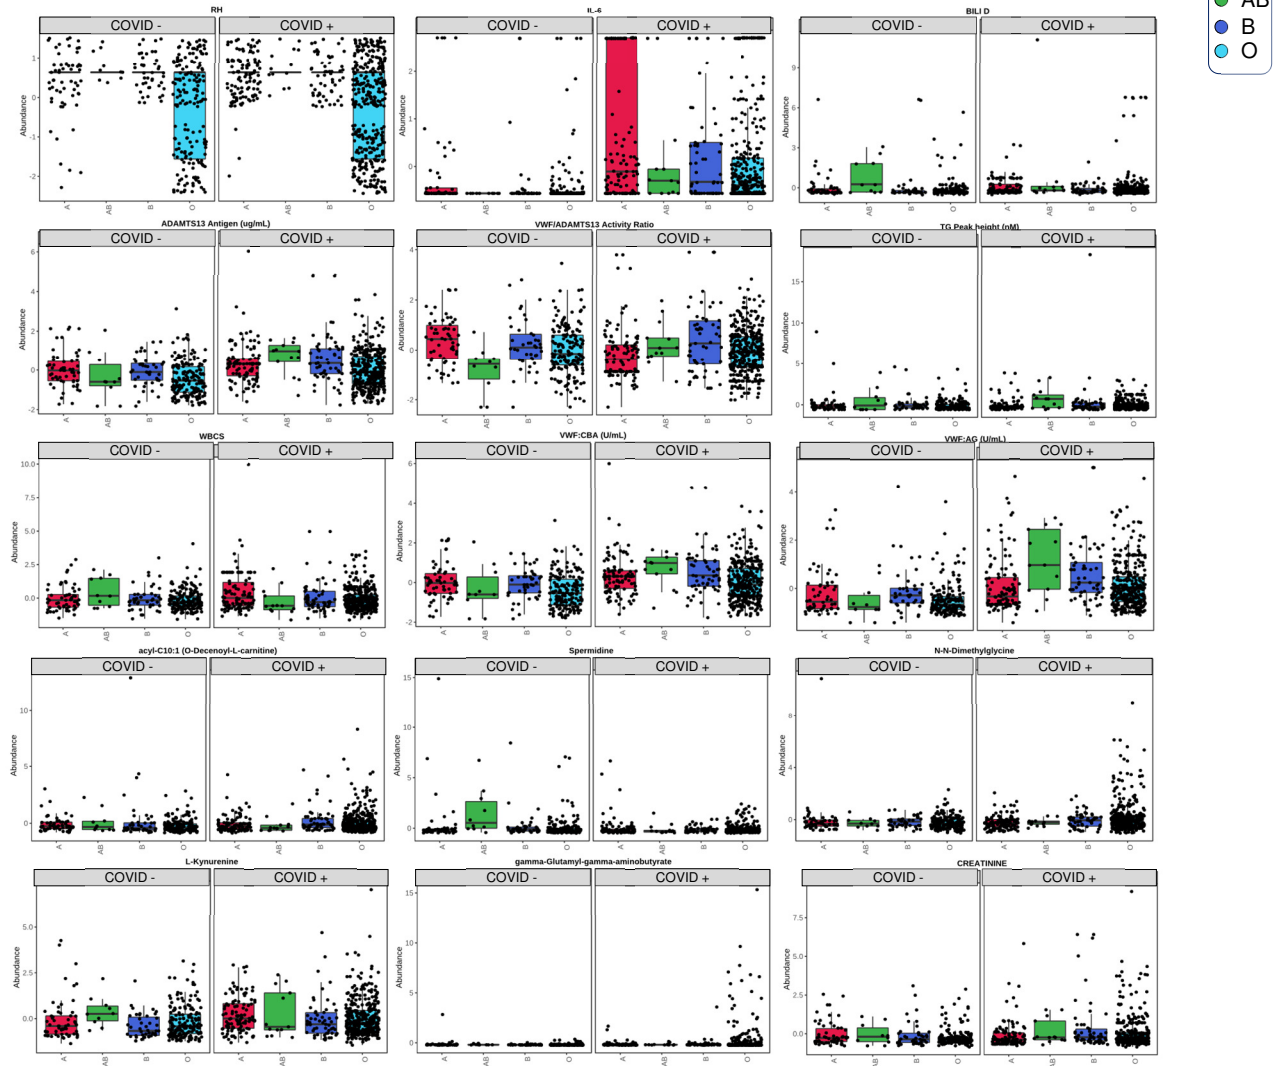

**Supplementary Figure 8 – Markers of blood group in COVID negative (-) and positive (+) patients, as determined by Two-way ANOVA.**

### Markers of mortality

○ Survived  
● Deceased

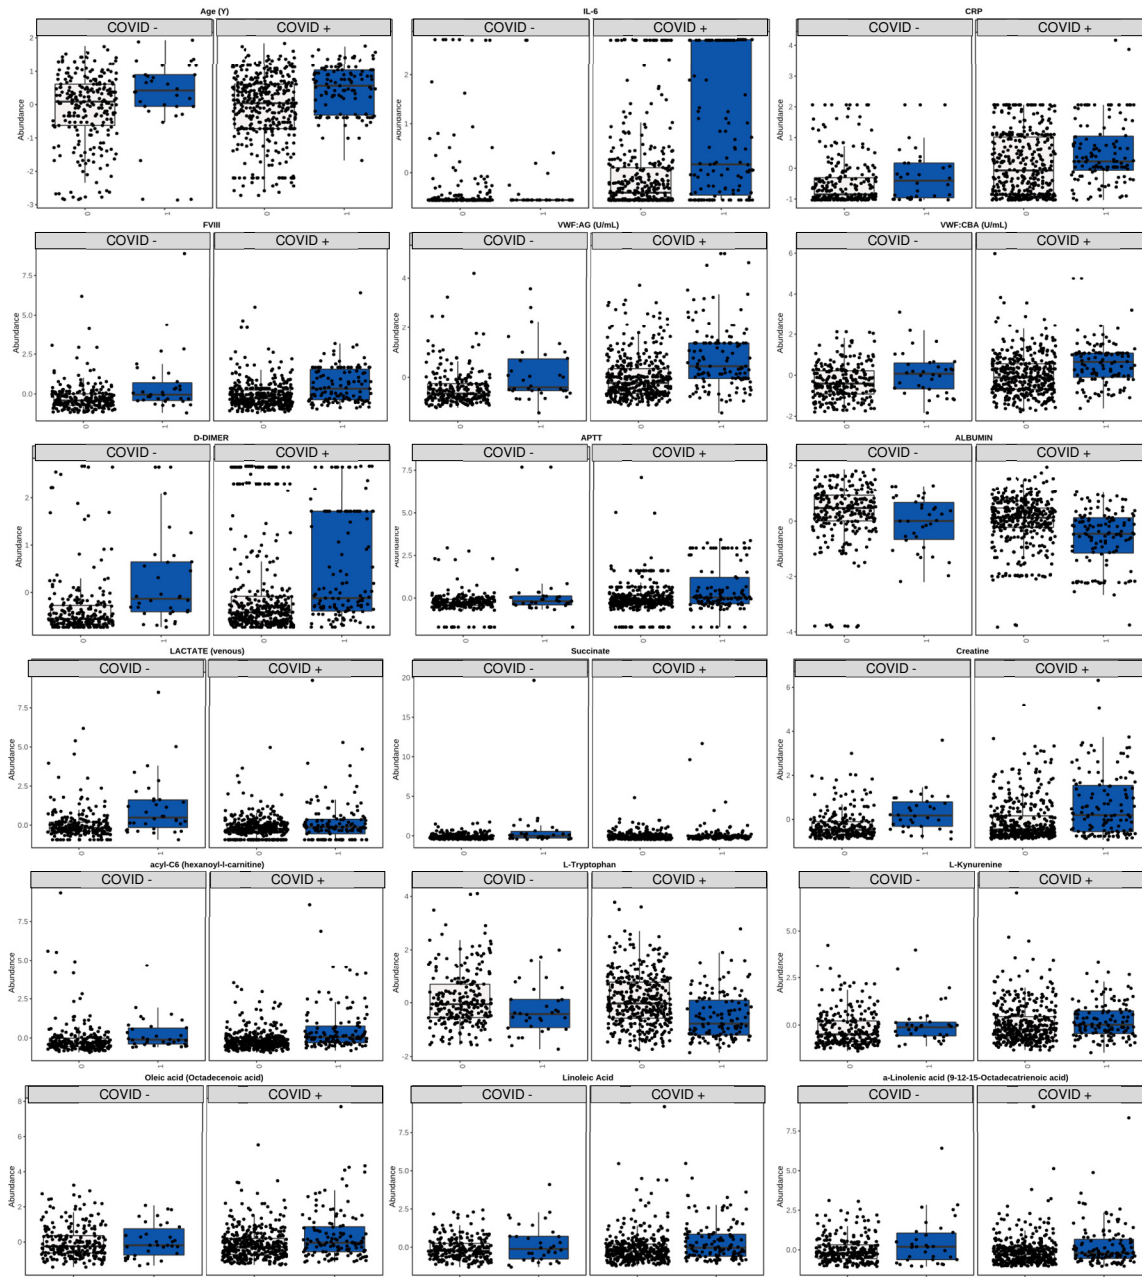

**Supplementary Figure 9 – Markers of mortality in COVID negative (-) and positive (+) patients, as determined by Two-way ANOVA (0 = survived; 1 = dead).**

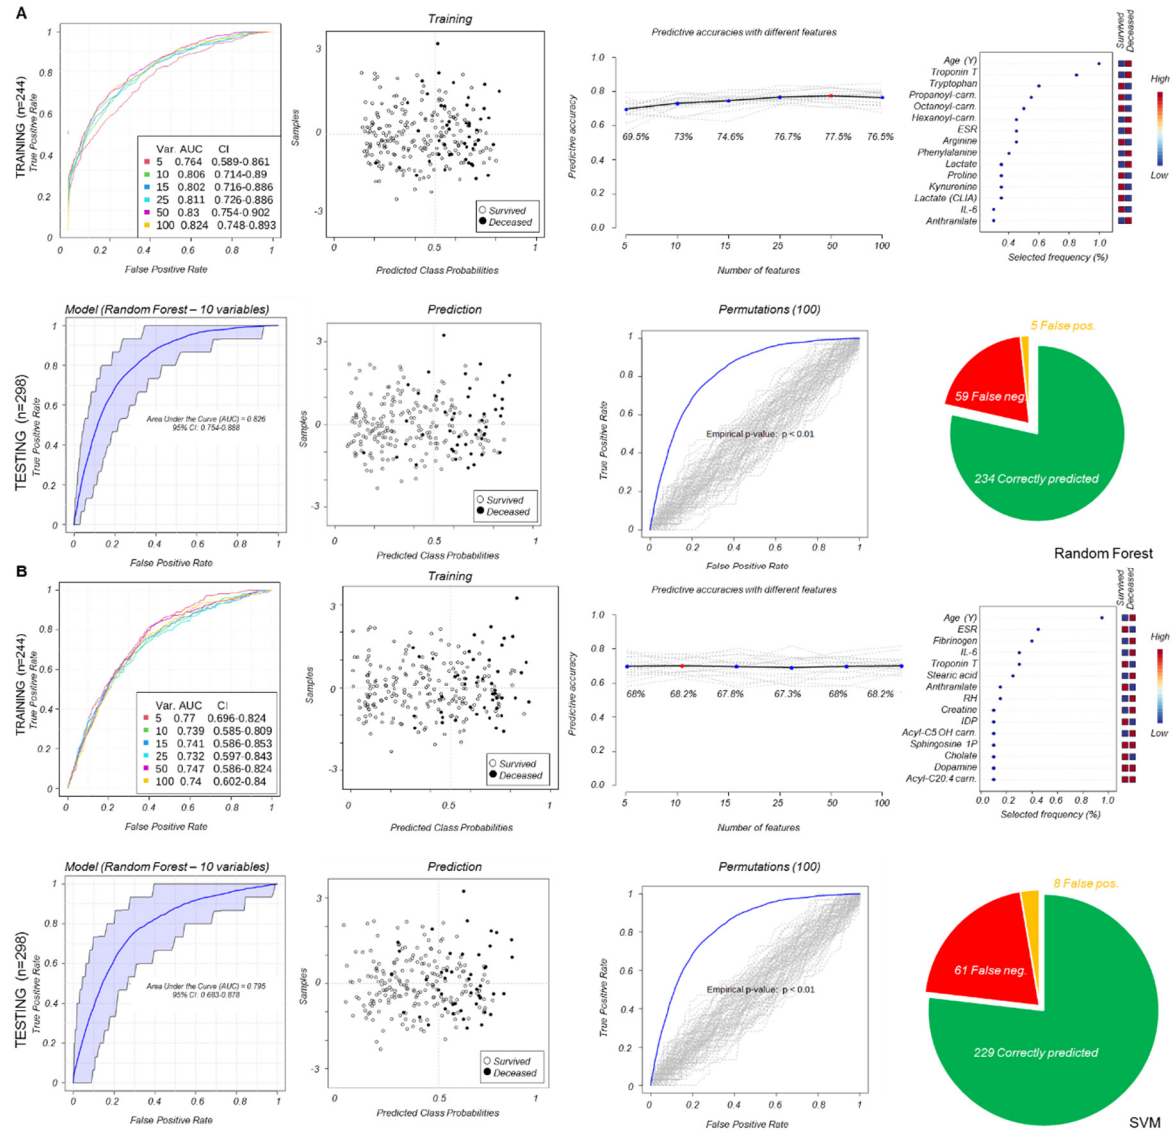

**Supplementary Figure 10– Comparison of predictive models of mortality via Random Forest (A) and SVM (B) algorithms. Patients were curated for metabolomics, clinical, coagulation and inflammatory variables (total n = 542). The cohort was then divided in two groups, one for training (n = 244) and one for testing (n = 298) of the algorithm, which resulted to be ~78% and ~75% accurate, respectively.**

*Impact of being on ventilator*

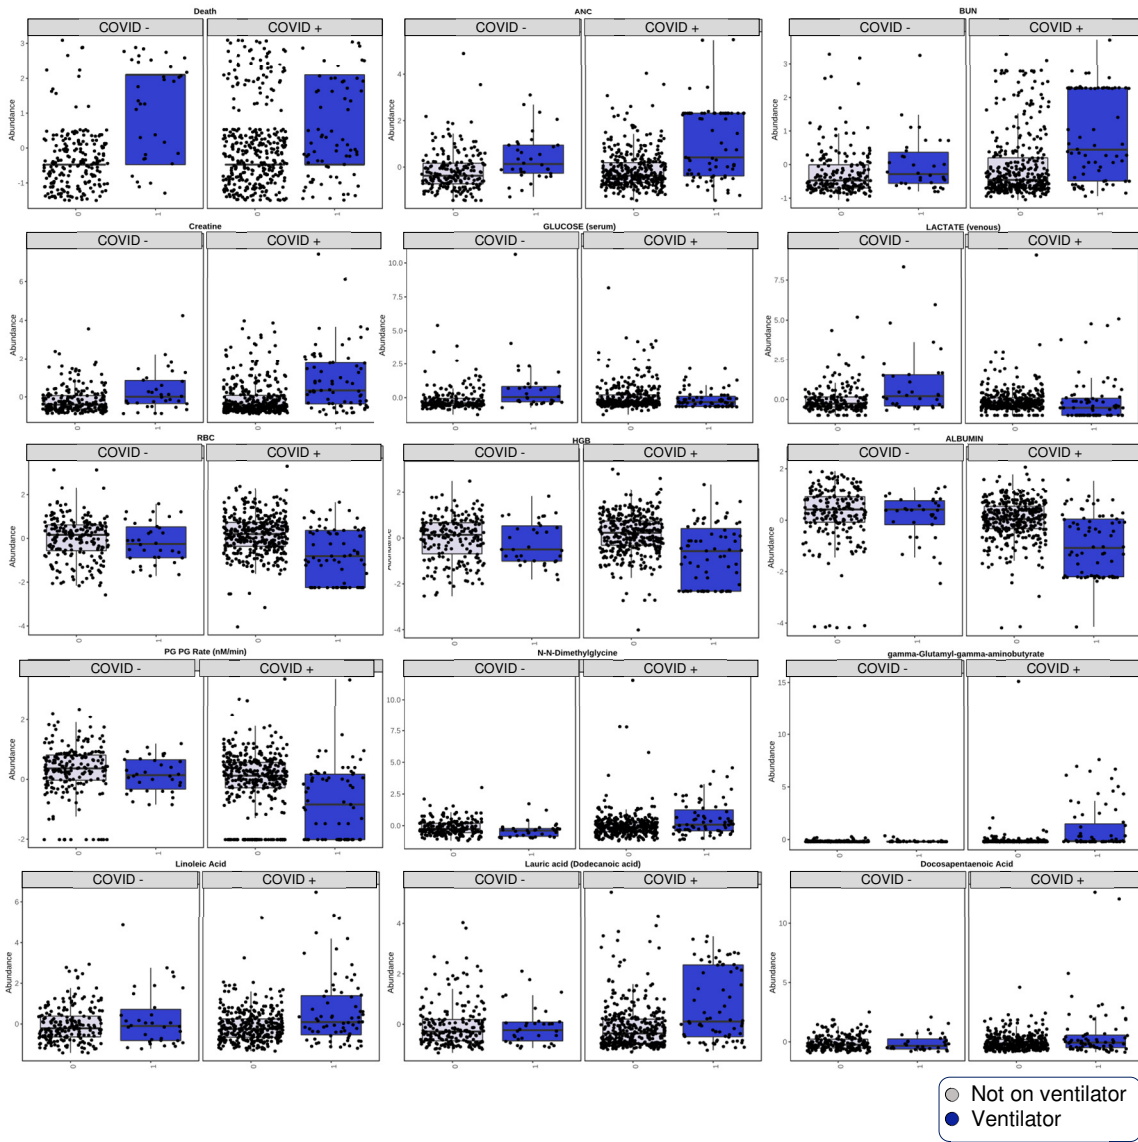

**Supplementary Figure 11 – Markers of ventilators in COVID negative (-) and positive (+) patients, as determined by Two-way ANOVA (0 = not on ventilator; 1 = on ventilator).**

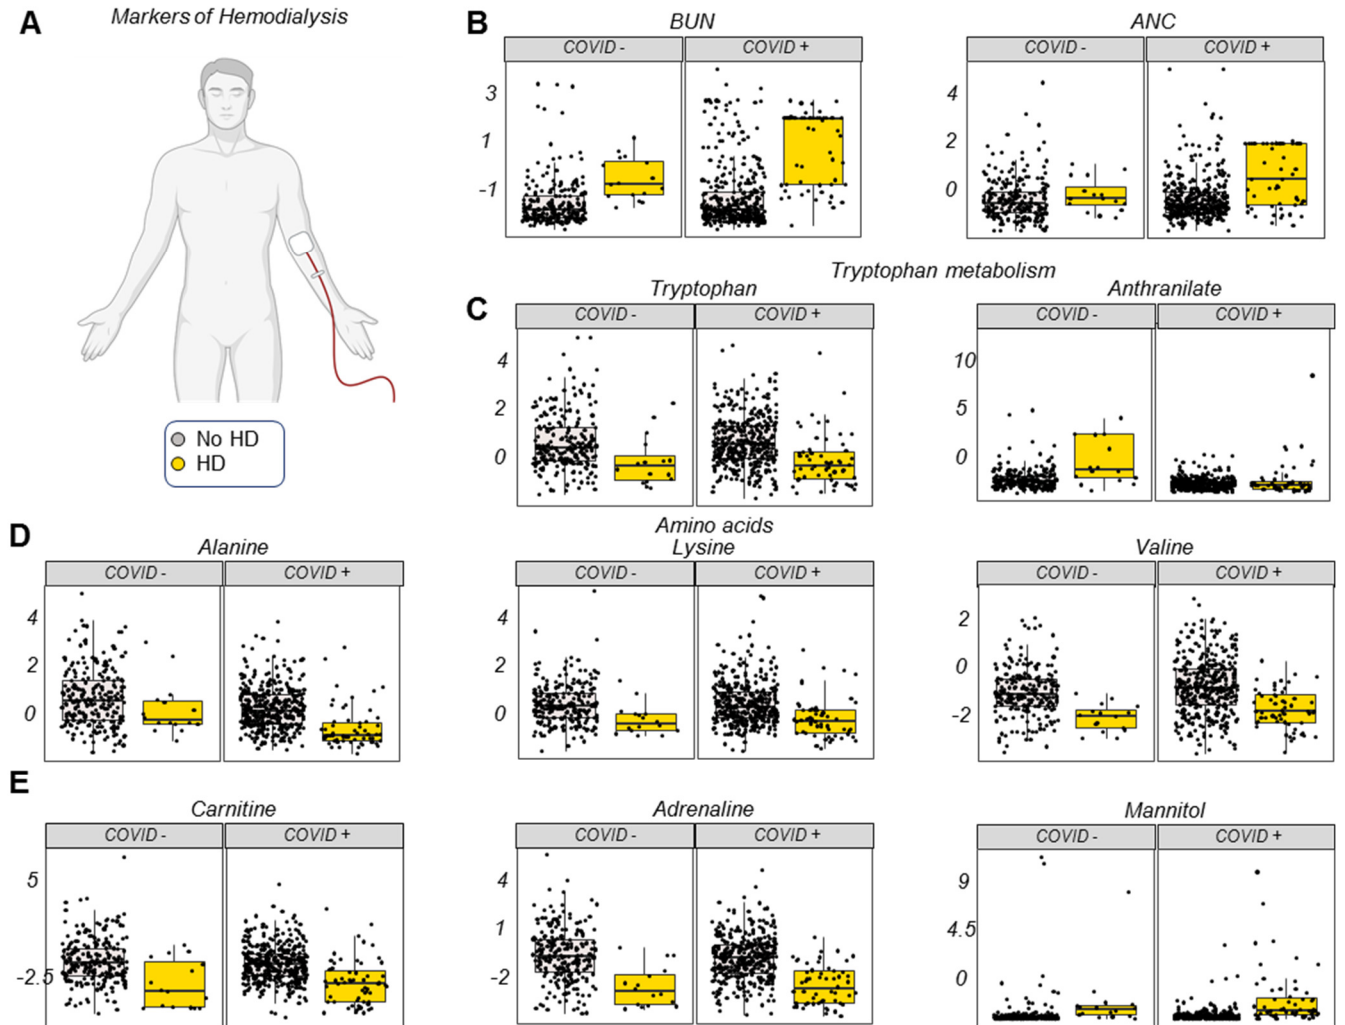

**Supplementary Figure 12 – Markers of hemodialysis (without clotting) in COVID negative (-) and positive (+) patients, as determined by Two-way ANOVA (0 = no hemodialysis; 1 = on hemodialysis).**

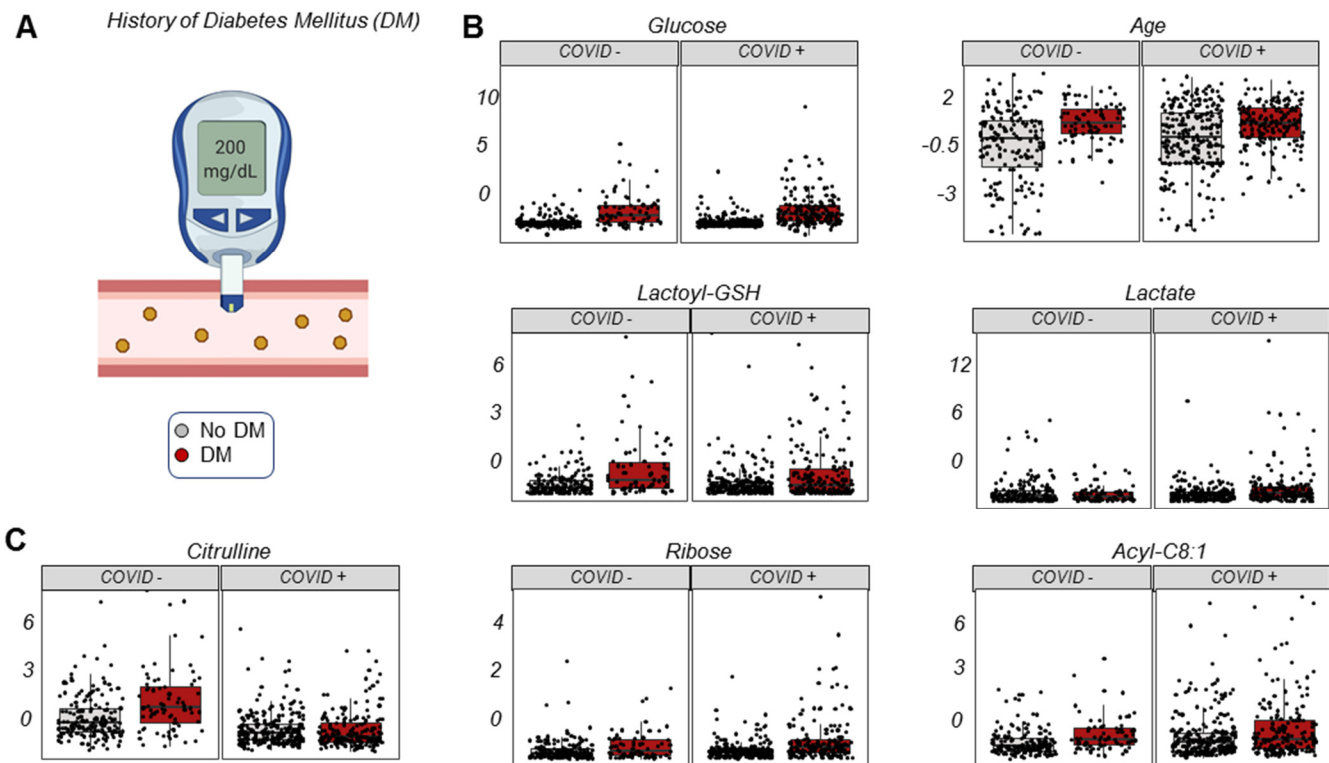

**Supplementary Figure 13 – Impact of pre-existing conditions such as diabetes in COVID negative (-) and positive (+) patients, as determined by Two-way ANOVA (0 = no history of diabetes; 1 = diabetes).**

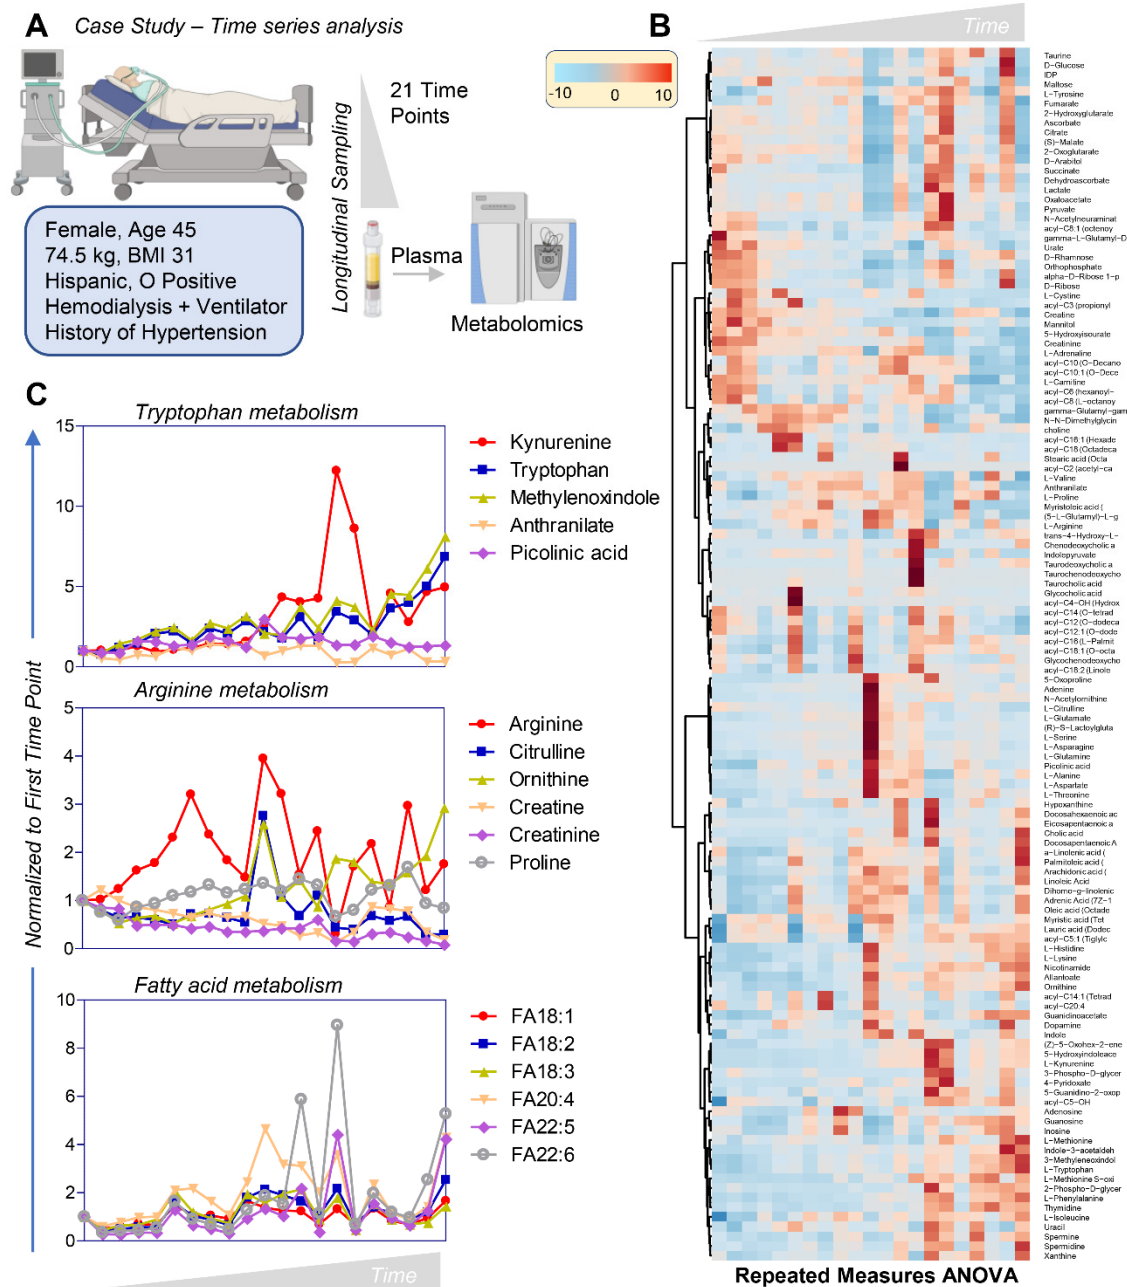

Supplementary Figure 14 – Time course analysis of a critically ill patient who survived.



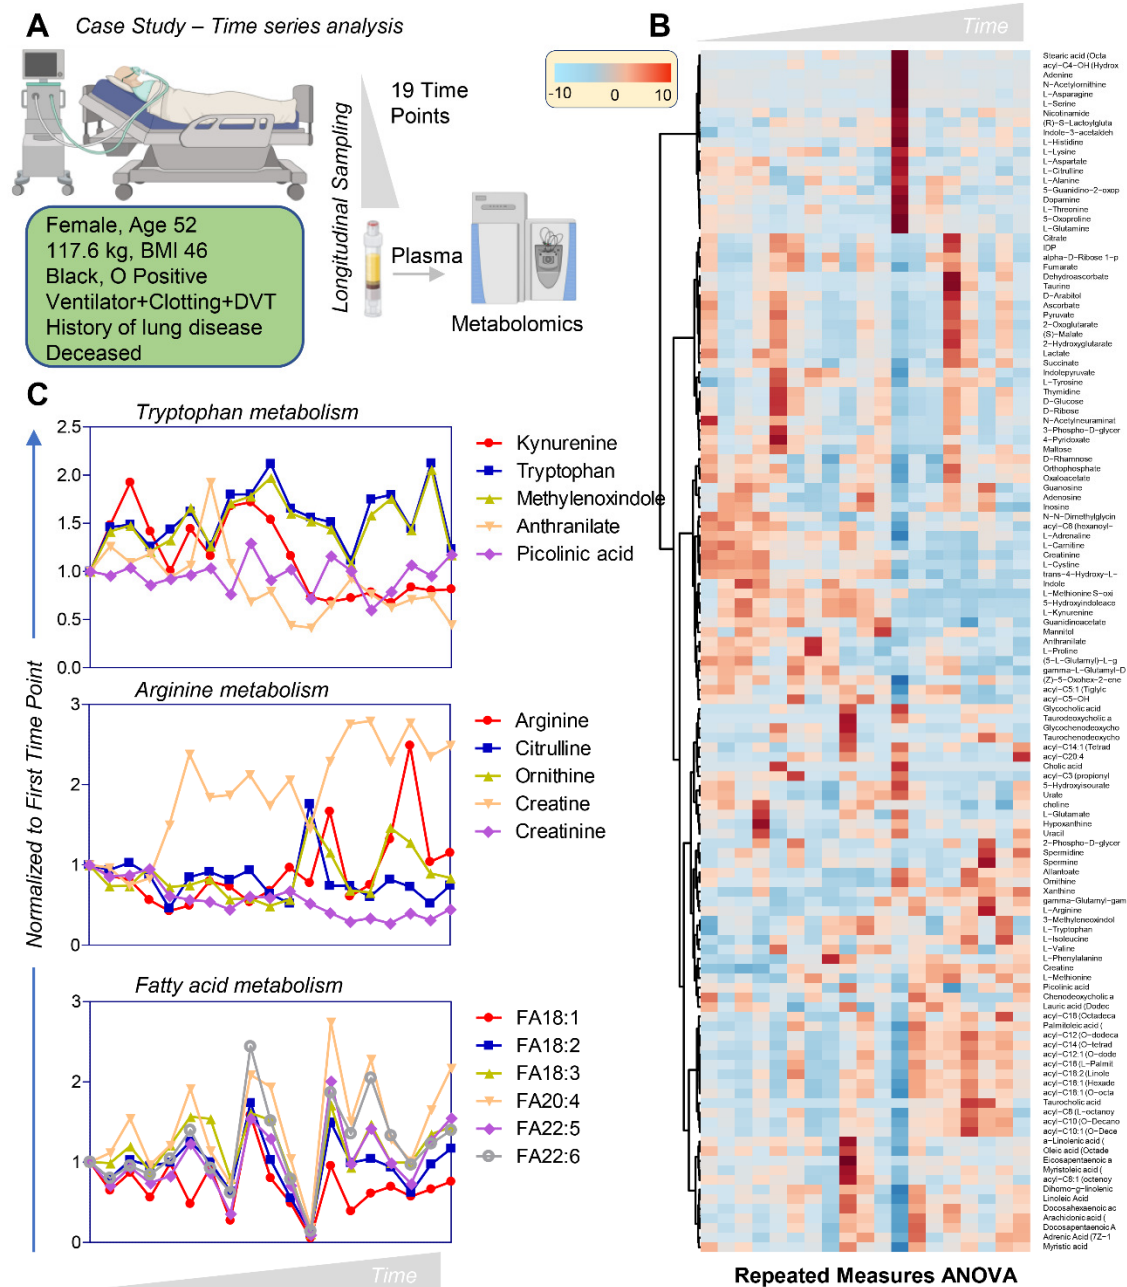

Supplementary Figure 16 – Time course analysis of a critically ill patient who died (vectorial version of in manuscript figure).
